# Supplementary material for: A Needs-Based Analysis of Teaching on Vaccinations and COVID-19 in German Medical Schools
Source: MDPI journal article supplement (doi:10.3390/vaccines10060975), 2022-06-19
Supplement: s1 [file s1]

## **Coding Guide**

*How could teaching about vaccination education and immunization be further improved?*

Approach:

- Qualitative content analysis
- Inductive category formation
- n = 248

## Thematic overview map

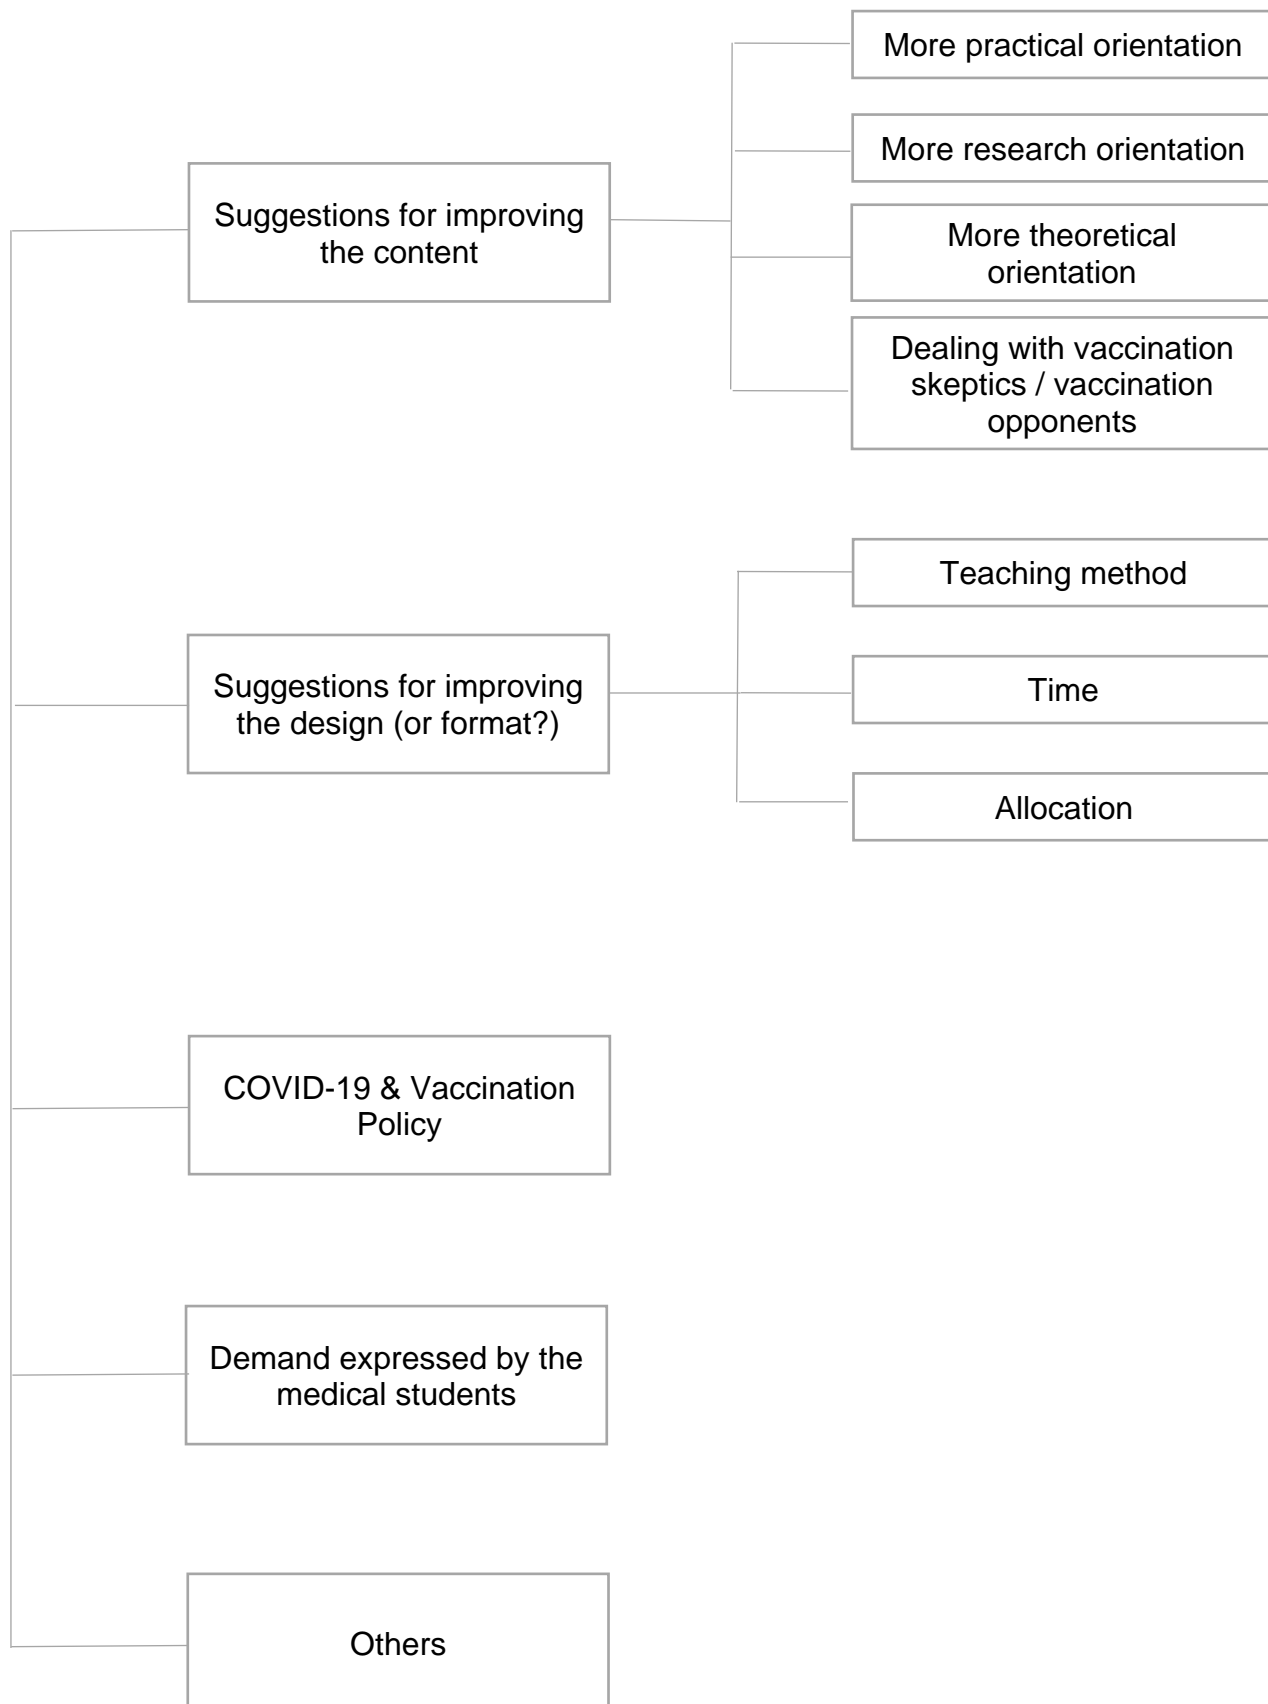

### Suggestions for improving the content

|                                      | Coding | Quantity |
|--------------------------------------|--------|----------|
| <b>More practical orientation</b>    | Total  | 48       |
| Practical exercises (not specified)  | MP02   | 12       |
| Simulation patients / role plays     | MP01   | 11       |
| Vaccination education / Consultation | MP03   | 10       |
| Practice vaccination                 | MP08   | 8        |
| Case studies from clinical practice  | MP06   | 6        |
| Excursion to a vaccine manufacturer  | MP07   | 1        |

|                                                      | Coding | Quantity |
|------------------------------------------------------|--------|----------|
| <b>More research orientation</b>                     | Total  | 21       |
| Dealing with epidemiological and scientific findings | MF02   | 18       |
| Recommended reading                                  | MF03   | 2        |
| Abmoss article                                       | MF04   | 1        |

|                                                                                                             | Coding | Quantity |
|-------------------------------------------------------------------------------------------------------------|--------|----------|
| <b>More theoretical orientation</b>                                                                         | Total  | 27       |
| Background knowledge on vaccination, vaccines, vaccine commission, etc.                                     | MT01   | 15       |
| Recognizing misinformation                                                                                  | MT03   | 8        |
| Ethics and immunization education                                                                           | MT04   | 3        |
| Vaccination in relation to general practitioners / Immunization knowledge as it relates to family practice. | MT02   | 1        |

|                                                                            | Coding | Quantity |
|----------------------------------------------------------------------------|--------|----------|
| <b>Dealing with vaccination skeptics / vaccination opponents</b>           | Total  | 82       |
| Conducting conversations with vaccination skeptics / vaccination opponents | UI01   | 42       |
| Pro and contra vaccination                                                 | UI04   | 26       |
| Vaccination as a free decision                                             | UI02   | 8        |
| Discussion sessions, e.g. with vaccination skeptics                        | UI03   | 6        |

### Formale Verbesserungsvorschläge der Medizinstudierenden

|                                                                                      | Coding | Quantity |
|--------------------------------------------------------------------------------------|--------|----------|
| <b>Teaching method</b>                                                               | Total  | 35       |
| As an elective course offering                                                       | LM03   | 9        |
| As interactive teaching formats e.g. seminar, POL, etc.                              | LM12   | 8        |
| As a lecture                                                                         | LM02   | 6        |
| Up-to-date and available (learning) materials, e.g. via the teaching platform Moodle | LM13   | 5        |
| No additional examination                                                            | LM05   | 4        |

|                                                |      |   |
|------------------------------------------------|------|---|
| Classroom teaching                             | LM07 | 2 |
| Physicians from clinical practice as lecturers | LM10 | 1 |

|                                                     |        |          |
|-----------------------------------------------------|--------|----------|
|                                                     | Coding | Quantity |
| <b>Time</b>                                         | Total  | 8        |
| To be offered in the first semesters of study       | ZP01   | 3        |
| To be offered continuously in the course of studies | ZP03   | 4        |
| To be offered in the higher semesters               | ZP02   | 1        |

|                                                                |        |          |
|----------------------------------------------------------------|--------|----------|
|                                                                | Coding | Quantity |
| <b>Allocation</b>                                              | Total  | 12       |
| Provide immunization/vaccination education across disciplines. | ZU01   | 5        |
| With reference to interviewing Gesprächsführung?               | ZU03   | 3        |
| With reference to general medicine                             | ZU02   | 2        |
| With reference to microbiology/virology                        | ZU04   | 2        |

### **COVID-19 & Vaccination Policy**

|                                                                                 |        |          |
|---------------------------------------------------------------------------------|--------|----------|
|                                                                                 | Coding | Quantity |
| <b>COVID-19 &amp; Vaccination Policy</b>                                        | Total  | 46       |
| Criticism of teaching on COVID-19                                               | C03    | 25       |
| Criticism of vaccination campaign in Germany (general and specific to COVID-19) | C02    | 9        |
| Criticism of vaccine distribution to students                                   | C04    | 4        |
| Promotion of student projects                                                   | WI04   | 4        |
| Vaccination education in schools                                                | S05    | 4        |

### **Demand expressed by the medical students**

|                                                                      |        |          |
|----------------------------------------------------------------------|--------|----------|
|                                                                      | Coding | Quantity |
| <b>Demand expressed by the medical students</b>                      | Total  | 48       |
| Wish to integrate immunization/vaccine education into the curriculum | BD02   | 38       |
| Satisfied with current teaching on immunization                      | BD03   | 7        |
| No interest in more teaching on immunization/vaccine education       | BD01   | 3        |

### **Others**

|                                                                                                                                                     |        |          |
|-----------------------------------------------------------------------------------------------------------------------------------------------------|--------|----------|
|                                                                                                                                                     | Coding | Quantity |
| <b>Others</b>                                                                                                                                       | Total  | 44       |
| Student has not yet attended a course on immunization/vaccine education and does not indicate whether it will be offered during the course of study | S04    | 21       |
| Not usable                                                                                                                                          | S02    | 12       |

|                                                                                           |     |   |
|-------------------------------------------------------------------------------------------|-----|---|
| Course on vaccination/vaccination education is only offered later in the course of study. | S03 | 6 |
| So far not part of the medical studies                                                    | S01 | 5 |

\*Relevant categories for the results section > 10
