# Supplementary material for: A Needs-Based Analysis of Teaching on Vaccinations and COVID-19 in German Medical Schools
Source: MDPI journal article supplement (doi:10.3390/vaccines10060975), 2022-06-19
Supplement: s1 [file s1]

### German to English translated non-demographic, questionnaire/items included in this study

[illegible][illegible]



|                                                                                      |                          |                          |                          |                          |                          |                          |                          |
|--------------------------------------------------------------------------------------|--------------------------|--------------------------|--------------------------|--------------------------|--------------------------|--------------------------|--------------------------|
| I am confident that I can answer questions from patients about the disease COVID-19. | <input type="checkbox"/> |
|--------------------------------------------------------------------------------------|--------------------------|--------------------------|--------------------------|--------------------------|--------------------------|--------------------------|--------------------------|

|                                                                                                                                                                 |
|-----------------------------------------------------------------------------------------------------------------------------------------------------------------|
| <b>4. What could be done to further improve teaching on the topic of ‘vaccination’ and ‘vaccination education’? Would you like to write us another comment?</b> |
|                                                                                                                                                                 |
