# Supplementary material for: A Needs-Based Analysis of Teaching on Vaccinations and COVID-19 in German Medical Schools
Source: Vaccines (Basel). 2022 Jun 19;10(6):975. doi: 10.3390/vaccines10060975 (PMC9228741; doi:10.3390/vaccines10060975)
Supplement: Supplementary file 1 [file vaccines-10-00975-s001.zip › Table S1.xlsx]

## Sheet: in
lfdn	external_lfdn	tester	dispcode	lastpage	quality	duration	c_0001	c_0002	p_0001	p_0002	p_0003	STUDYPHASE	FACHSEMESTER	AGE	GENDER	Engagement_Impfaufklaerungsinitiative	Verteilung_Dekanat	Verteilung_Fachschaft	Verteilung_bvmd	Verteilung_sonstigeSocialMedia	Verteilung_Andere	Verteilung_Andere_TXT	INFO_RESPONSIBILITY	INFO_INFORM_OTHERS	INFO_CONFIDENT_CVACC	INFO_CONFIDENT_COVID	TEACHING_STATUS_COVID	TEACHING_STATUS_CVACC	TEACHING_STATUS_VACCDISEASE	TEACHING_STATUS_NNRKR	TEACHING_STATUS_COMMUNICATION	TEACHING_STATUS_SCEPSIS	TEACHING_WISH_IMPORTANCE	TEACHING_WISH_NNRKR	TEACHING_WISH_EDUCATION_VACC	TEACHING_WISH_PROVACC	TEACHING_WISH_PRACTICAL_EXERCISE	TEACHING_WISH_DIGITAL_COMMUNICATION	TEACHING_WISH_SCEPSIS	TEACHING_WISH_PRACTICAL	TEACHING_WISH_PRESENCE	TEACHING_WISH_ONLINE	TEACHING_WISH_PRESENCE_ONLINE	TEACHING_WISH_TEST_VACC	TEACHING_WISH_TEST_EDUCATION	TEACHING_WISH_TXT	v_4841	browser	referer
900	0	0	31	5822659	-77	2504	-77	-77	-99	-99	d	3	13	26	1	1	0	0	0	0	1	Selbst Organisator	7	7	6	4	3	3	7	4	2	1	7	7	7	7	7	6	7	7	6	5	4	6	7	Studentische Projekte fördern	SDH	Mozilla/5.0 (Linux; Android 7.0; SAMSUNG SM-A310F) AppleWebKit/537.36 (KHTML, like Gecko) SamsungBrowser/13.2 Chrome/83.0.4103.106 Mobile Safari/537.36	-99
78	0	0	31	5822659	-77	791	-77	-77	-99	-99	d	2	4	21	2	2	0	1	0	0	0	-99	5	6	4	4	5	7	5	3	6	5	4	4	6	4	5	4	5	5	5	2	2	4	4	-99	-66	Mozilla/5.0 (Windows NT 10.0; Win64; x64; rv:87.0) Gecko/20100101 Firefox/87.0	-99
79	0	0	31	5822659	-77	1095	-77	-77	-99	-99	d	2	4	22	1	2	0	1	0	0	0	-99	1	5	2	6	2	2	3	7	2	1	7	7	5	5	2	2	4	6	7	4	5	1	1	-99	-66	Mozilla/5.0 (Macintosh; Intel Mac OS X 10_15) AppleWebKit/605.1.15 (KHTML, like Gecko) Version/13.0.3 Safari/605.1.15	-99
81	0	0	31	5822659	-77	1009	-77	-77	-99	-99	d	5	2	28	2	2	1	0	0	0	0	-99	1	1	0	3	0	0	0	0	0	0	0	0	0	0	0	0	0	0	0	0	0	0	0	-99	-66	Mozilla/5.0 (Linux; Android 11; SAMSUNG SM-G991B/G991BXXU1ATLD) AppleWebKit/537.36 (KHTML, like Gecko) SamsungBrowser/13.2 Chrome/83.0.4103.106 Mobile Safari/537.36	-99
82	0	0	31	5822659	-77	949	-77	-77	-99	-99	d	2	4	24	2	2	1	0	0	0	0	-99	3	5	5	5	3	4	3	3	3	2	6	7	6	6	6	6	6	5	6	2	4	2	2	-99	-66	Mozilla/5.0 (iPhone; CPU iPhone OS 14_4_1 like Mac OS X) AppleWebKit/605.1.15 (KHTML, like Gecko) Version/14.0.3 Mobile/15E148 Safari/604.1	-99
84	0	0	31	5822659	-77	1014	-77	-77	-99	-99	d	2	4	24	2	2	1	0	0	0	0	-99	6	6	3	2	2	2	5	6	6	6	7	5	5	4	3	3	3	4	4	3	3	2	3	-99	-66	Mozilla/5.0 (Linux; Android 9; MRD-LX1) AppleWebKit/537.36 (KHTML, like Gecko) Chrome/89.0.4389.105 Mobile Safari/537.36	-99
83	0	0	31	5822659	-77	1066	-77	-77	-99	-99	d	2	8	25	2	2	1	0	0	0	0	-99	6	7	7	6	5	2	3	5	5	3	3	2	6	7	5	5	6	6	6	6	5	4	3	-99	-66	Mozilla/5.0 (iPhone; CPU iPhone OS 14_4_1 like Mac OS X) AppleWebKit/605.1.15 (KHTML, like Gecko) Version/14.0.3 Mobile/15E148 Safari/604.1	-99
87	0	0	31	5822659	-77	962	-77	-77	-99	-99	d	2	8	22	2	2	1	0	0	0	0	-99	6	6	5	5	2	1	5	3	3	5	6	5	6	5	3	5	5	6	3	7	6	3	3	-99	-66	Mozilla/5.0 (iPhone; CPU iPhone OS 14_4_1 like Mac OS X) AppleWebKit/605.1.15 (KHTML, like Gecko) Version/14.0.3 Mobile/15E148 Safari/604.1	-99
88	0	0	31	5812245	-77	11	-77	-77	-99	-99	d	4	-66	-66	-77	-77	-77	-77	-77	-77	-77	-66	-77	-77	-77	-77	-77	-77	-77	-77	-77	-77	-77	-77	-77	-77	-77	-77	-77	-77	-77	-77	-77	-77	-77	-66	-66	Mozilla/5.0 (Android 10; Mobile; rv:87.0) Gecko/87.0 Firefox/87.0	-99
89	0	0	31	5822659	-77	1162	-77	-77	-99	-99	d	2	8	25	1	2	0	1	0	0	0	-99	7	7	3	3	1	1	1	1	1	1	1	1	5	4	4	3	4	5	3	4	4	1	1	-99	-66	Mozilla/5.0 (iPhone; CPU iPhone OS 14_0_1 like Mac OS X) AppleWebKit/605.1.15 (KHTML, like Gecko) Version/14.0 Mobile/15E148 Safari/604.1	-99
91	0	0	31	5822659	-77	1313	-77	-77	-99	-99	d	3	11	24	1	2	1	0	0	0	0	-99	4	5	6	6	2	2	7	5	5	6	7	7	7	7	7	7	7	7	7	1	1	7	7	-99	-66	Mozilla/5.0 (Linux; Android 8.0.0; SAMSUNG SM-A320FL) AppleWebKit/537.36 (KHTML, like Gecko) SamsungBrowser/13.2 Chrome/83.0.4103.106 Mobile Safari/537.36	-99
92	0	0	31	5822659	-77	1159	-77	-77	-99	-99	d	2	8	30	2	2	1	0	0	0	0	-99	5	6	4	1	2	1	3	3	1	1	7	7	7	7	7	7	7	7	5	3	7	5	4	-99	-66	Mozilla/5.0 (Linux; Android 8.0.0; SAMSUNG SM-A520F) AppleWebKit/537.36 (KHTML, like Gecko) SamsungBrowser/13.2 Chrome/83.0.4103.106 Mobile Safari/537.36	-99
137	0	0	31	5822659	-77	1074	-77	-77	-99	-99	d	2	10	25	1	2	1	1	0	0	0	-99	6	7	7	7	4	1	5	5	5	4	6	4	3	5	5	2	4	5	7	1	1	2	2	-99	-66	Mozilla/5.0 (Macintosh; Intel Mac OS X 10_14_6) AppleWebKit/605.1.15 (KHTML, like Gecko) Version/14.0.3 Safari/605.1.15	-99
90	0	0	31	5822659	-77	777	-77	-77	-99	-99	d	2	2	35	2	2	1	0	0	0	0	-99	5	6	6	5	2	2	1	1	1	1	7	6	6	6	5	5	7	6	1	6	4	5	5	-99	-66	Mozilla/5.0 (Windows NT 10.0; Win64; x64) AppleWebKit/537.36 (KHTML, like Gecko) Chrome/89.0.4389.82 Safari/537.36	https://mail.google.com/
93	0	0	31	5822659	-77	892	-77	-77	-99	-99	d	2	4	20	2	2	0	1	0	0	0	-99	6	6	5	5	3	7	3	1	2	1	7	7	7	7	7	7	7	7	7	7	7	3	3	-99	-66	Mozilla/5.0 (Linux; Android 10; SAMSUNG SM-G960F) AppleWebKit/537.36 (KHTML, like Gecko) SamsungBrowser/13.2 Chrome/83.0.4103.106 Mobile Safari/537.36	-99
94	0	0	31	5822659	-77	657	-77	-77	-99	-99	d	2	6	22	2	2	1	0	0	0	0	-99	5	5	4	5	3	3	3	3	3	1	7	5	2	5	3	5	5	7	7	1	1	1	1	Da ich das nirgendwo anders schreiben kann: Ich hatte Famulatur in der Hausarztpraxis. Ich habe trotz Nachfrage keine Impfung bekommen. Dann wurde ich positiv für Covid 19 getestet und bin jetzt einfach nur extrem sauer.	-66	Mozilla/5.0 (Linux; Android 10; H8324) AppleWebKit/537.36 (KHTML, like Gecko) Chrome/85.0.4183.127 Mobile Safari/537.36 (Ecosia android@85.0.4183.127)	-99
96	0	0	31	5822659	-77	1980	-77	-77	-99	-99	d	3	8	28	1	2	1	0	0	0	0	-99	5	7	5	5	1	1	6	2	1	1	7	7	7	4	1	4	7	7	4	4	7	4	4	-99	-66	Mozilla/5.0 (iPhone; CPU iPhone OS 14_2 like Mac OS X) AppleWebKit/605.1.15 (KHTML, like Gecko) Version/14.0.1 Mobile/15E148 Safari/604.1	-99
95	0	0	31	5822659	-77	836	-77	-77	-99	-99	d	2	9	25	2	2	0	1	0	0	0	-99	6	7	5	5	1	1	5	4	1	1	7	7	4	7	5	3	7	7	4	4	5	2	2	-99	-66	Mozilla/5.0 (Macintosh; Intel Mac OS X 10_15_6) AppleWebKit/605.1.15 (KHTML, like Gecko) Version/14.0.3 Safari/605.1.15	-99
99	0	0	31	5822659	-77	1123	-77	-77	-99	-99	d	2	10	25	2	2	0	1	0	0	0	-99	5	4	4	4	2	2	5	5	3	2	7	5	6	5	5	5	6	5	4	5	4	3	3	-99	-66	Mozilla/5.0 (iPhone; CPU iPhone OS 14_4_2 like Mac OS X) AppleWebKit/605.1.15 (KHTML, like Gecko) Version/14.0.3 Mobile/15E148 Safari/604.1	-99
97	0	0	32	5822659	-77	-1	-77	-77	-99	-99	d	2	10	24	1	2	1	0	0	0	0	-99	7	7	5	6	1	1	5	3	1	1	7	6	7	7	7	5	7	7	4	4	4	3	3	-99	-99	Mozilla/5.0 (Linux; Android 10; ELE-L09) AppleWebKit/537.36 (KHTML, like Gecko) Chrome/89.0.4389.105 Mobile Safari/537.36	-99
109	0	0	31	5822659	-77	961	-77	-77	-99	-99	d	2	9	24	2	2	1	1	0	0	0	-99	5	5	4	4	4	4	5	4	4	4	7	7	5	5	4	3	5	6	3	4	6	4	2	-99	-66	Mozilla/5.0 (Android 10; Mobile; rv:87.0) Gecko/87.0 Firefox/87.0	-99
98	0	0	31	5822659	-77	1743	-77	-77	-99	-99	d	2	8	23	2	2	1	1	0	0	0	-99	5	6	6	6	5	5	7	7	7	7	7	3	5	3	5	6	5	6	6	4	7	4	4	-99	-66	Mozilla/5.0 (iPhone; CPU iPhone OS 14_4_2 like Mac OS X) AppleWebKit/605.1.15 (KHTML, like Gecko) Version/14.0.3 Mobile/15E148 Safari/604.1	-99
102	0	0	31	5822659	-77	1005	-77	-77	-99	-99	d	2	10	25	1	2	1	0	0	0	0	-99	7	7	6	6	1	1	5	2	1	2	7	7	7	4	6	4	7	7	7	1	7	5	5	-99	-66	Mozilla/5.0 (Windows NT 10.0; Win64; x64; rv:87.0) Gecko/20100101 Firefox/87.0	-99
105	0	0	31	5822659	-77	1066	-77	-77	-99	-99	d	2	10	24	2	2	0	1	0	0	0	-99	7	7	7	7	4	5	7	7	5	3	6	7	3	4	3	4	4	5	2	4	4	1	1	-99	-66	Mozilla/5.0 (Windows NT 10.0; Win64; x64; rv:79.0) Gecko/20100101 Firefox/79.0	https://deref-web.de/mail/client/x9Lv80FeR9U/dereferrer/?redirectUrl=https%3A%2F%2Fww3.unipark.de%2Fuc%2FCOVRAM%2F%3Fa%3D%26b%3D%26c%3Dd
100	0	0	31	5822659	-77	1321	-77	-77	-99	-99	d	2	9	32	2	2	0	1	0	0	0	-99	6	7	7	5	1	1	2	4	4	4	7	7	7	7	5	4	4	4	4	4	4	1	1	-99	-66	Mozilla/5.0 (Windows NT 6.1; Win64; x64) AppleWebKit/537.36 (KHTML, like Gecko) Chrome/89.0.4389.90 Safari/537.36	-99
101	0	0	32	5822659	-77	-1	-77	-77	-99	-99	d	2	6	25	2	2	0	1	0	0	0	-99	5	5	5	4	2	3	2	3	3	1	0	0	0	0	0	0	0	0	0	0	0	0	0	-99	-99	Mozilla/5.0 (Macintosh; Intel Mac OS X 10_15_7) AppleWebKit/537.36 (KHTML, like Gecko) Chrome/89.0.4389.90 Safari/537.36	-99
103	0	0	31	5822659	-77	1017	-77	-77	-99	-99	d	3	13	24	3	2	1	0	0	0	0	-99	4	5	5	5	1	1	6	6	5	5	6	4	4	4	4	5	5	6	4	4	4	4	4	-99	-66	Mozilla/5.0 (Linux; Android 10; SAMSUNG SM-A715F) AppleWebKit/537.36 (KHTML, like Gecko) SamsungBrowser/13.2 Chrome/83.0.4103.106 Mobile Safari/537.36	-99
107	0	0	31	5822659	-77	823	-77	-77	-99	-99	d	2	10	23	2	2	1	0	0	0	0	-99	2	5	5	5	2	2	6	6	6	3	7	7	7	7	7	7	7	7	7	4	4	4	4	-99	-66	Mozilla/5.0 (Linux; Android 10; ELE-L29 Build/HUAWEIELE-L29) AppleWebKit/537.36 (KHTML, like Gecko) Version/4.0 Chrome/89.0.4389.105 Mobile Safari/537.36 Hawk/TurboBrowser/v3.0.0.4.23.12271827	-99
106	0	0	31	5822659	-77	1136	-77	-77	-99	-99	d	2	8	21	1	2	1	0	0	0	0	-99	6	7	6	5	3	3	4	2	1	1	7	7	7	7	5	5	7	7	7	5	5	2	2	-99	-66	Mozilla/5.0 (Linux; Android 11; SM-G970F) AppleWebKit/537.36 (KHTML, like Gecko) Chrome/89.0.4389.105 Mobile Safari/537.36	android-app://com.google.android.gm/
108	0	0	31	5822659	-77	647	-77	-77	-99	-99	d	2	5	21	1	2	1	0	0	0	0	-99	5	5	6	6	3	3	5	2	3	2	7	7	7	7	7	7	7	7	4	6	5	2	2	-99	-66	Mozilla/5.0 (Linux; Android 10; HMA-L29) AppleWebKit/537.36 (KHTML, like Gecko) Chrome/89.0.4389.105 Mobile Safari/537.36	-99
111	0	0	31	5822659	-77	737	-77	-77	-99	-99	d	2	9	25	1	2	1	0	0	0	0	-99	6	6	4	7	3	3	4	4	3	1	6	6	6	6	2	2	5	5	5	2	3	2	2	-99	-66	Mozilla/5.0 (Windows NT 10.0; Win64; x64; rv:87.0) Gecko/20100101 Firefox/87.0	-99
115	0	0	31	5822659	-77	978	-77	-77	-99	-99	d	2	9	26	2	2	1	1	0	0	0	-99	7	7	5	5	1	4	5	1	1	3	7	7	6	5	6	7	6	7	7	5	7	2	2	-99	-66	Mozilla/5.0 (iPhone; CPU iPhone OS 14_4_1 like Mac OS X) AppleWebKit/605.1.15 (KHTML, like Gecko) Version/14.0.3 Mobile/15E148 Safari/604.1	-99
117	0	0	31	5822659	-77	2116	-77	-77	-99	-99	d	2	6	21	2	2	1	0	0	0	0	-99	6	7	5	4	5	4	2	2	2	2	7	7	5	7	5	7	7	7	5	5	7	3	7	-99	-66	Mozilla/5.0 (iPhone; CPU iPhone OS 14_4 like Mac OS X) AppleWebKit/605.1.15 (KHTML, like Gecko) Version/14.0.3 Mobile/15E148 Safari/604.1	-99
118	0	0	31	5822659	-77	1068	-77	-77	-99	-99	d	2	4	28	1	2	1	0	0	0	0	-99	7	7	7	7	2	2	1	1	1	1	7	6	7	7	7	1	7	7	7	3	3	7	7	-99	-66	Mozilla/5.0 (Linux; Android 10; SHIFT6mq) AppleWebKit/537.36 (KHTML, like Gecko) Chrome/89.0.4389.105 Mobile Safari/537.36	android-app://com.google.android.gm/
119	0	0	31	5822659	-77	1275	-77	-77	-99	-99	d	2	4	21	2	2	0	1	0	0	0	-99	4	6	4	5	6	6	3	2	6	1	7	5	6	5	7	1	6	7	7	3	5	2	2	-99	-66	Mozilla/5.0 (Linux; Android 11; SM-G973F) AppleWebKit/537.36 (KHTML, like Gecko) Chrome/89.0.4389.105 Mobile Safari/537.36	android-app://com.google.android.gm/
121	0	0	31	5822659	-77	1809	-77	-77	-99	-99	d	2	5	22	2	2	0	1	0	0	0	-99	5	5	3	6	4	3	6	5	4	3	6	4	5	6	5	5	5	5	4	6	5	5	5	-99	-66	Mozilla/5.0 (Linux; Android 11; Mi Note 10 Pro) AppleWebKit/537.36 (KHTML, like Gecko) Chrome/89.0.4389.105 Mobile Safari/537.36	android-app://com.google.android.gm/
123	0	0	31	5822659	-77	717	-77	-77	-99	-99	d	2	10	25	2	2	0	1	0	0	0	-99	7	7	5	5	5	5	5	5	5	5	7	7	7	7	7	7	7	7	2	6	5	7	7	-99	-66	Mozilla/5.0 (iPhone; CPU iPhone OS 14_4_1 like Mac OS X) AppleWebKit/605.1.15 (KHTML, like Gecko) Version/14.0.3 Mobile/15E148 Safari/604.1	-99
124	0	0	31	5822659	-77	1258	-77	-77	-99	-99	d	2	9	24	2	2	0	0	0	0	1	Studierendenportal	5	5	4	4	0	0	0	5	5	4	5	5	5	5	5	3	4	3	4	4	4	3	3	-99	-66	Mozilla/5.0 (Android 10; Mobile; rv:87.0) Gecko/87.0 Firefox/87.0	-99
125	0	0	31	5822659	-77	841	-77	-77	-99	-99	d	2	10	26	2	2	0	1	0	0	0	-99	7	7	4	3	1	1	3	1	1	3	7	7	7	7	7	7	7	7	4	4	7	7	7	-99	-66	Mozilla/5.0 (Macintosh; Intel Mac OS X 10_15_6) AppleWebKit/605.1.15 (KHTML, like Gecko) Version/14.0.3 Safari/605.1.15	-99
127	0	0	32	5822659	-77	-1	-77	-77	-99	-99	d	2	10	23	2	2	1	0	0	0	0	-99	6	6	6	7	3	2	6	5	4	4	6	6	6	4	5	4	6	6	7	2	4	2	2	-99	-66	Mozilla/5.0 (iPhone; CPU iPhone OS 14_4_2 like Mac OS X) AppleWebKit/605.1.15 (KHTML, like Gecko) Version/14.0 EdgiOS/46.2.0 Mobile/15E148 Safari/605.1.15	-99
126	0	0	31	5822659	-77	1424	-77	-77	-99	-99	d	2	10	24	2	2	0	1	0	0	0	-99	3	3	2	5	3	2	1	4	2	2	7	7	7	6	7	6	7	7	4	4	4	3	3	Definitiv mit einem Mix aus Informationsteil und praktischen Übungen mit Schauspielpatienten.	-66	Mozilla/5.0 (Linux; Android 9; SAMSUNG SM-G960F) AppleWebKit/537.36 (KHTML, like Gecko) SamsungBrowser/13.2 Chrome/83.0.4103.106 Mobile Safari/537.36	-99
128	0	0	31	5822659	-77	680	-77	-77	-99	-99	d	2	7	35	2	2	0	1	0	0	0	-99	1	2	2	2	2	1	1	1	2	2	7	7	6	6	6	6	6	5	6	5	6	5	4	-99	-66	Mozilla/5.0 (iPhone; CPU iPhone OS 14_4_1 like Mac OS X) AppleWebKit/605.1.15 (KHTML, like Gecko) Version/14.0.3 Mobile/15E148 Safari/604.1	-99
129	0	0	31	5822659	-77	1625	-77	-77	-99	-99	d	2	10	24	2	2	1	0	0	0	0	-99	4	5	5	5	1	1	5	6	6	2	5	5	6	5	2	2	6	4	4	4	4	4	3	-99	-66	Mozilla/5.0 (Windows NT 10.0; Win64; x64) AppleWebKit/537.36 (KHTML, like Gecko) Chrome/89.0.4389.90 Safari/537.36	-99
132	0	0	31	5822659	-77	1370	-77	-77	-99	-99	d	2	10	25	2	2	1	0	0	0	0	-99	7	7	6	7	1	1	7	5	1	3	7	7	5	6	3	3	6	5	5	3	6	2	2	-99	-66	Mozilla/5.0 (iPhone; CPU iPhone OS 13_6 like Mac OS X) AppleWebKit/605.1.15 (KHTML, like Gecko) Version/13.1.2 Mobile/15E148 Safari/604.1	-99
133	0	0	31	5822659	-77	1752	-77	-77	-99	-99	d	2	10	27	1	2	1	0	0	0	0	-99	3	3	7	7	5	6	6	6	3	4	7	7	5	7	4	5	5	7	6	5	7	4	4	-99	-66	Mozilla/5.0 (iPhone; CPU iPhone OS 14_4_2 like Mac OS X) AppleWebKit/605.1.15 (KHTML, like Gecko) Version/14.0.3 Mobile/15E148 Safari/604.1	-99
134	0	0	31	5822659	-77	813	-77	-77	-99	-99	d	2	10	27	1	2	0	1	0	0	0	-99	7	7	7	7	4	4	7	7	7	1	7	7	4	7	4	7	7	4	1	7	1	1	1	-99	-66	Mozilla/5.0 (iPhone; CPU iPhone OS 14_4_2 like Mac OS X) AppleWebKit/605.1.15 (KHTML, like Gecko) Version/14.0.3 Mobile/15E148 Safari/604.1	-99
136	0	0	31	5822659	-77	1167	-77	-77	-99	-99	d	2	6	22	2	2	1	1	0	0	0	-99	1	1	1	1	1	1	1	1	1	1	7	6	6	5	4	4	5	5	7	5	6	4	4	-99	-66	Mozilla/5.0 (Macintosh; Intel Mac OS X 10_15_6) AppleWebKit/605.1.15 (KHTML, like Gecko) Version/14.0.3 Safari/605.1.15	-99
138	0	0	31	5822659	-77	917	-77	-77	-99	-99	d	2	10	22	2	2	1	0	0	0	0	-99	3	3	6	6	3	2	4	4	3	5	6	5	6	6	6	6	6	6	4	6	6	3	5	-99	-66	Mozilla/5.0 (Windows NT 10.0; Win64; x64) AppleWebKit/537.36 (KHTML, like Gecko) Chrome/89.0.4389.90 Safari/537.36	-99
141	0	0	31	5822659	-77	1456	-77	-77	-99	-99	d	2	10	26	1	2	0	1	0	0	0	-99	4	2	5	5	1	1	5	5	3	2	7	5	6	7	7	4	7	5	6	4	7	2	2	-99	-66	Mozilla/5.0 (iPhone; CPU iPhone OS 14_4_1 like Mac OS X) AppleWebKit/605.1.15 (KHTML, like Gecko) Version/14.0.3 Mobile/15E148 Safari/604.1	-99
142	0	0	31	5822659	-77	1228	-77	-77	-99	-99	d	2	4	28	2	1	1	0	0	0	0	-99	6	6	6	7	2	2	2	1	1	1	7	7	7	7	7	7	7	7	7	4	4	5	5	-99	-66	Mozilla/5.0 (iPhone; CPU iPhone OS 14_4_1 like Mac OS X) AppleWebKit/605.1.15 (KHTML, like Gecko) Version/14.0.3 Mobile/15E148 Safari/604.1	-99
152	0	0	31	5822659	-77	1579	-77	-77	-99	-99	d	2	8	25	3	2	1	0	0	0	0	-99	5	3	5	5	2	1	1	5	2	1	5	5	4	5	7	7	7	7	7	7	7	6	5	-99	-66	Mozilla/5.0 (Android 8.0.0; Mobile; rv:87.0) Gecko/87.0 Firefox/87.0	-99
146	0	0	31	5822659	-77	711	-77	-77	-99	-99	d	2	6	27	2	2	1	0	0	0	0	-99	5	6	6	6	2	2	3	3	3	3	7	7	6	7	6	6	6	7	4	4	4	2	2	-99	-66	Mozilla/5.0 (Windows NT 10.0; Win64; x64) AppleWebKit/537.36 (KHTML, like Gecko) Chrome/89.0.4389.114 Safari/537.36	-99
147	0	0	31	5822659	-77	1198	-77	-77	-99	-99	d	2	9	24	2	2	1	1	0	0	0	-99	6	7	7	5	5	6	7	6	3	2	5	5	4	5	1	5	6	7	4	5	6	2	2	-99	-66	Mozilla/5.0 (Windows NT 10.0; Win64; x64) AppleWebKit/537.36 (KHTML, like Gecko) Chrome/89.0.4389.90 Safari/537.36	https://click.mail.ru/
148	0	0	31	5822659	-77	1132	-77	-77	-99	-99	d	2	2	20	2	2	1	0	0	0	0	-99	7	7	6	5	5	5	6	5	3	5	7	5	4	7	5	4	5	4	4	5	4	4	4	-99	-66	Mozilla/5.0 (iPhone; CPU iPhone OS 13_7 like Mac OS X) AppleWebKit/605.1.15 (KHTML, like Gecko) Version/13.1.2 Mobile/15E148 Safari/604.1	-99
2386	0	0	31	5822659	-77	1831	-77	-77	-99	-99	d	2	8	25	2	3	1	1	0	0	0	-99	3	4	4	4	3	3	6	6	5	2	7	6	7	6	6	6	6	6	6	6	6	6	5	Praktische Übungen	-99	Mozilla/5.0 (Linux; Android 7.0; SM-A310F) AppleWebKit/537.36 (KHTML, like Gecko) Chrome/89.0.4389.105 Mobile Safari/537.36	-99
149	0	0	31	5822659	-77	1436	-77	-77	-99	-99	d	2	8	30	2	2	0	1	0	0	0	-99	2	1	2	3	2	2	3	2	2	2	7	7	6	6	6	6	6	7	6	4	5	5	5	-99	-66	Mozilla/5.0 (Linux; Android 10; ELE-L29) AppleWebKit/537.36 (KHTML, like Gecko) Chrome/89.0.4389.105 Mobile Safari/537.36	-99
150	0	0	31	5822659	-77	1844	-77	-77	-99	-99	d	2	3	19	1	2	1	1	0	0	0	-99	5	5	2	5	6	7	6	0	5	0	7	2	4	0	0	0	5	0	0	0	0	0	0	-99	-66	Mozilla/5.0 (Linux; Android 10; FP3) AppleWebKit/537.36 (KHTML, like Gecko) Chrome/88.0.4324.181 Mobile Safari/537.36 (Ecosia android@88.0.4324.181)	android-app://com.google.android.gm/
151	0	0	31	5822659	-77	1479	-77	-77	-99	-99	d	2	6	28	1	2	1	0	0	0	0	-99	2	2	2	2	1	1	1	1	1	1	7	7	7	6	3	3	7	6	6	6	4	1	1	-99	-66	Mozilla/5.0 (Linux; Android 10; CLT-L29) AppleWebKit/537.36 (KHTML, like Gecko) Chrome/89.0.4389.105 Mobile Safari/537.36	-99
206	0	0	31	5822659	-77	952	-77	-77	-99	-99	d	2	8	29	2	2	1	1	0	0	0	-99	7	7	5	5	3	3	6	6	6	7	7	7	7	7	2	5	7	7	4	4	4	1	1	-99	-66	Mozilla/5.0 (Linux; Android 7.0; HTC One M9) AppleWebKit/537.36 (KHTML, like Gecko) Chrome/87.0.4280.141 Mobile Safari/537.36	-99
153	0	0	31	5822659	-77	1335	-77	-77	-99	-99	d	2	7	22	2	2	0	1	0	0	0	-99	5	6	5	6	5	2	6	3	2	2	7	7	7	7	2	2	7	5	5	3	4	3	3	-99	-66	Mozilla/5.0 (iPhone; CPU iPhone OS 14_4_2 like Mac OS X) AppleWebKit/605.1.15 (KHTML, like Gecko) Version/14.0.3 Mobile/15E148 Safari/604.1	-99
154	0	0	32	5822659	-77	-1	-77	-77	-99	-99	d	3	12	29	1	2	1	0	0	0	0	-99	5	5	5	5	1	1	3	2	2	1	6	6	0	6	4	6	5	0	5	3	6	5	4	-99	-66	Mozilla/5.0 (iPhone; CPU iPhone OS 14_4_2 like Mac OS X) AppleWebKit/605.1.15 (KHTML, like Gecko) Version/14.0.3 Mobile/15E148 Safari/604.1	-99
155	0	0	32	5822659	-77	-1	-77	-77	-99	-99	d	2	8	22	2	2	0	1	0	0	0	-99	6	6	6	6	2	2	4	3	1	1	7	7	7	7	7	5	7	7	7	2	3	5	5	-99	-66	Mozilla/5.0 (iPhone; CPU iPhone OS 14_4_2 like Mac OS X) AppleWebKit/605.1.15 (KHTML, like Gecko) Version/14.0.3 Mobile/15E148 Safari/604.1	-99
156	0	0	31	5822659	-77	1008	-77	-77	-99	-99	d	2	10	24	2	2	1	0	0	0	0	-99	1	1	1	1	1	1	6	3	3	3	7	7	7	7	5	6	7	7	4	4	4	4	4	-99	-66	Mozilla/5.0 (Macintosh; Intel Mac OS X 10_15_6) AppleWebKit/605.1.15 (KHTML, like Gecko) Version/14.0.3 Safari/605.1.15	-99
159	0	0	31	5812245	-77	16	-77	-77	-99	-99	d	4	-66	-66	-77	-77	-77	-77	-77	-77	-77	-66	-77	-77	-77	-77	-77	-77	-77	-77	-77	-77	-77	-77	-77	-77	-77	-77	-77	-77	-77	-77	-77	-77	-77	-66	-66	Mozilla/5.0 (iPhone; CPU iPhone OS 14_4_2 like Mac OS X) AppleWebKit/605.1.15 (KHTML, like Gecko) Version/14.0.3 Mobile/15E148 Safari/604.1	-99
160	0	0	31	5822659	-77	782	-77	-77	-99	-99	d	2	10	32	2	2	1	0	0	0	0	-99	7	7	7	7	4	7	7	4	1	1	7	7	7	7	7	7	7	7	5	5	7	3	2	In einem QSB einbauen und dazu auch wirklich drei/vier Kurse anbieten, die besucht werden müssen inklusive Praxisbezug	-66	Mozilla/5.0 (Android 10; Mobile; rv:87.0) Gecko/87.0 Firefox/87.0	-99
161	0	0	31	5822659	-77	1097	-77	-77	-99	-99	d	2	11	24	1	2	0	0	0	1	0	-99	6	7	5	5	1	1	7	6	6	5	6	3	5	6	4	3	5	3	6	3	4	1	1	-99	-66	Mozilla/5.0 (Linux; Android 10; SM-G975F) AppleWebKit/537.36 (KHTML, like Gecko) Chrome/89.0.4389.105 Mobile Safari/537.36	android-app://com.google.android.gm/
162	0	0	31	5822659	-77	852	-77	-77	-99	-99	d	2	8	22	2	2	1	0	0	0	0	-99	5	5	2	4	3	2	5	6	3	2	6	4	7	7	7	5	7	5	6	5	5	4	3	-99	-66	Mozilla/5.0 (Macintosh; Intel Mac OS X 10.10; rv:77.0) Gecko/20100101 Firefox/77.0	-99
164	0	0	32	5822659	-77	-1	-77	-77	-99	-99	d	2	2	25	1	2	0	1	0	0	0	-99	6	6	4	4	1	1	0	0	0	0	0	0	0	0	0	0	0	0	0	0	0	0	0	-99	-66	Mozilla/5.0 (Windows NT 10.0; Win64; x64) AppleWebKit/537.36 (KHTML, like Gecko) Chrome/89.0.4389.90 Safari/537.36 Edg/89.0.774.63	-99
165	0	0	31	5822659	-77	1085	-77	-77	-99	-99	d	2	8	30	2	2	1	0	0	0	0	-99	5	7	5	5	5	5	5	5	4	4	7	7	7	7	5	7	7	7	4	7	5	4	4	-99	-66	Mozilla/5.0 (Android 8.0.0; Mobile; rv:87.0) Gecko/87.0 Firefox/87.0	-99
168	0	0	31	5822659	-77	1916	-77	-77	-99	-99	d	2	10	24	2	2	0	1	0	0	0	-99	6	5	4	4	1	2	5	2	4	2	7	7	7	6	7	7	7	7	4	6	7	2	2	-99	-66	Mozilla/5.0 (iPhone; CPU iPhone OS 14_4_1 like Mac OS X) AppleWebKit/605.1.15 (KHTML, like Gecko) Version/14.0.3 Mobile/15E148 Safari/604.1	-99
169	0	0	31	5822659	-77	1060	-77	-77	-99	-99	d	2	4	30	2	2	1	0	0	0	0	-99	7	7	5	3	2	2	6	1	1	1	7	7	7	7	7	7	7	7	4	7	4	4	7	-99	-66	Mozilla/5.0 (Linux; Android 8.0.0; BAH2-W19) AppleWebKit/537.36 (KHTML, like Gecko) Chrome/89.0.4389.105 Safari/537.36	https://mail.google.com/
171	0	0	31	5822659	-77	679	-77	-77	-99	-99	d	2	2	19	2	2	0	1	0	0	0	-99	7	7	4	4	2	4	0	0	0	0	5	0	0	7	7	7	7	7	4	0	7	0	0	-99	-66	Mozilla/5.0 (iPhone; CPU iPhone OS 14_4_1 like Mac OS X) AppleWebKit/605.1.15 (KHTML, like Gecko) Version/14.0.3 Mobile/15E148 Safari/604.1	-99
172	0	0	31	5822659	-77	2343	-77	-77	-99	-99	d	2	4	29	1	2	1	0	0	0	0	-99	4	6	6	6	2	3	1	1	2	1	7	6	6	5	4	1	6	7	7	1	4	1	1	Auf jeden Fall sollte kein neues Fach zusätzlich zum Studium dazu kommen, mit zusätzlichen Prüfungen. Das Medizinstudium ist sowieso schon mit zu vielen Themen überfrachtet, die für den späteren Beruf völlig irrelevant und nutzlos sind. Und unsere Studienzeit ist begrenzt, die menschliche Auffassungsgabe auch. Statt dieser Themen kann man die Studienzeit nutzen, um das Thema Impfen mehr anzusprec…	-66	Mozilla/5.0 (Windows NT 10.0; Win64; x64; rv:87.0) Gecko/20100101 Firefox/87.0	-99
173	0	0	31	5822659	-77	1109	-77	-77	-99	-99	d	2	6	21	2	2	0	1	0	0	0	-99	6	1	1	1	2	1	3	2	4	2	7	5	3	5	4	4	5	6	5	2	5	2	1	-99	-66	Mozilla/5.0 (Android 8.0.0; Mobile; rv:87.0) Gecko/87.0 Firefox/87.0	-99
174	0	0	31	5822659	-77	1261	-77	-77	-99	-99	d	2	10	22	2	2	1	0	0	0	0	-99	7	7	6	7	5	1	7	1	1	1	7	7	7	7	4	7	7	7	7	7	7	5	5	-99	-66	Mozilla/5.0 (Macintosh; Intel Mac OS X 10_15_1) AppleWebKit/537.36 (KHTML, like Gecko) Chrome/88.0.4324.192 Safari/537.36	-99
176	0	0	31	5822659	-77	1022	-77	-77	-99	-99	d	2	10	30	2	2	1	0	0	0	0	-99	6	7	4	4	0	0	0	0	0	0	0	0	0	0	0	0	0	0	0	0	0	0	0	-99	-66	Mozilla/5.0 (Linux; Android 11; SM-T860) AppleWebKit/537.36 (KHTML, like Gecko) Chrome/89.0.4389.105 Safari/537.36	-99
179	0	0	31	5822659	-77	1114	-77	-77	-99	-99	d	2	6	20	2	2	0	1	0	0	0	-99	7	7	3	6	1	1	1	1	1	1	7	7	2	2	2	2	5	6	7	1	1	5	1	-99	-66	Mozilla/5.0 (Windows NT 10.0; WOW64; Trident/7.0; rv:11.0) like Gecko	-99
180	0	0	31	5822659	-77	1136	-77	-77	-99	-99	d	2	10	22	2	2	1	0	0	0	0	-99	6	7	6	5	3	1	2	2	2	2	7	7	5	7	7	5	6	7	5	6	6	3	3	-99	-66	Mozilla/5.0 (iPhone; CPU iPhone OS 14_4_2 like Mac OS X) AppleWebKit/605.1.15 (KHTML, like Gecko) Version/14.0.3 Mobile/15E148 Safari/604.1	-99
181	0	0	31	5822659	-77	1226	-77	-77	-99	-99	d	2	4	28	2	2	1	0	0	0	0	-99	7	7	6	6	3	4	2	2	3	4	7	7	7	7	5	3	5	7	7	1	6	6	6	-99	-66	Mozilla/5.0 (Macintosh; Intel Mac OS X 10_15_4) AppleWebKit/605.1.15 (KHTML, like Gecko) Version/13.1 Safari/605.1.15	-99
183	0	0	31	5822659	-77	1216	-77	-77	-99	-99	d	2	8	22	2	2	0	1	0	0	0	-99	5	5	4	4	3	2	6	5	3	3	7	7	7	7	7	7	6	7	3	7	4	3	2	-99	-66	Mozilla/5.0 (iPhone; CPU iPhone OS 12_5_1 like Mac OS X) AppleWebKit/605.1.15 (KHTML, like Gecko) Version/12.1.2 Mobile/15E148 Safari/604.1	-99
185	0	0	31	5822659	-77	1139	-77	-77	-99	-99	d	2	5	29	2	2	0	1	0	0	0	-99	6	6	6	6	1	1	1	1	1	1	7	6	5	4	1	1	5	5	1	7	1	1	1	-99	-66	Mozilla/5.0 (iPhone; CPU iPhone OS 14_4_1 like Mac OS X) AppleWebKit/605.1.15 (KHTML, like Gecko) Version/14.0.3 Mobile/15E148 Safari/604.1	-99
184	0	0	31	5812245	-77	12	-77	-77	-99	-99	d	6	-66	-66	-77	-77	-77	-77	-77	-77	-77	-66	-77	-77	-77	-77	-77	-77	-77	-77	-77	-77	-77	-77	-77	-77	-77	-77	-77	-77	-77	-77	-77	-77	-77	-66	-66	Mozilla/5.0 (iPhone; CPU iPhone OS 14_4_2 like Mac OS X) AppleWebKit/605.1.15 (KHTML, like Gecko) Version/14.0.3 Mobile/15E148 Safari/604.1	-99
186	0	0	31	5822659	-77	855	-77	-77	-99	-99	d	2	10	23	2	2	0	1	0	0	0	-99	2	3	2	2	2	2	2	2	2	1	7	6	6	6	6	5	6	6	6	1	4	2	2	-99	-66	Mozilla/5.0 (Linux; Android 11; SAMSUNG SM-A515F) AppleWebKit/537.36 (KHTML, like Gecko) SamsungBrowser/13.2 Chrome/83.0.4103.106 Mobile Safari/537.36	-99
187	0	0	31	5822659	-77	1192	-77	-77	-99	-99	d	2	3	23	2	2	1	0	0	0	0	-99	7	7	5	5	2	5	1	2	1	1	7	7	7	7	7	7	7	7	4	4	4	2	2	-99	-66	Mozilla/5.0 (Macintosh; Intel Mac OS X 10_15_6) AppleWebKit/605.1.15 (KHTML, like Gecko) Version/14.0.3 Safari/605.1.15	https://student.uniklinikum-leipzig.de/studium/allgemeines_interessantes.php
189	0	0	31	5822659	-77	748	-77	-77	-99	-99	d	2	9	25	2	2	0	1	0	0	0	-99	6	6	5	4	2	1	4	3	2	2	7	7	7	7	5	3	7	7	4	6	7	4	4	-99	-66	Mozilla/5.0 (iPhone; CPU iPhone OS 14_4_2 like Mac OS X) AppleWebKit/605.1.15 (KHTML, like Gecko) Version/14.0.3 Mobile/15E148 Safari/604.1	-99
190	0	0	31	5822659	-77	2481	-77	-77	-99	-99	d	2	10	32	2	2	1	0	0	0	0	-99	5	5	5	5	2	3	5	4	1	1	6	6	7	7	7	7	7	7	4	5	4	5	5	-99	-66	Mozilla/5.0 (iPhone; CPU iPhone OS 14_4_2 like Mac OS X) AppleWebKit/605.1.15 (KHTML, like Gecko) Version/14.0.3 Mobile/15E148 Safari/604.1	-99
192	0	0	31	5822659	-77	1067	-77	-77	-99	-99	d	2	3	21	1	2	1	0	0	0	0	-99	7	7	6	4	6	6	4	3	1	1	7	6	7	4	5	4	6	5	4	4	4	4	4	-99	-66	Mozilla/5.0 (Windows NT 6.3; Win64; x64) AppleWebKit/537.36 (KHTML, like Gecko) Chrome/89.0.4389.90 Safari/537.36	-99
193	0	0	31	5822659	-77	1201	-77	-77	-99	-99	d	2	10	24	2	2	0	1	0	0	0	-99	5	5	5	5	4	4	6	5	5	3	6	6	5	5	5	4	6	6	6	4	4	3	3	-99	-66	Mozilla/5.0 (Linux; Android 10; Redmi Note 8) AppleWebKit/537.36 (KHTML, like Gecko) Chrome/85.0.4183.127 Mobile Safari/537.36 (Ecosia android@85.0.4183.127)	-99
194	0	0	31	5822659	-77	1318	-77	-77	-99	-99	d	2	1	20	2	2	1	0	0	0	0	-99	6	7	6	3	2	1	6	2	1	3	7	7	7	7	7	7	7	7	2	5	7	6	5	-99	-66	Mozilla/5.0 (iPhone; CPU iPhone OS 14_4_1 like Mac OS X) AppleWebKit/605.1.15 (KHTML, like Gecko) Version/14.0.3 Mobile/15E148 Safari/604.1	-99
195	0	0	31	5822659	-77	1065	-77	-77	-99	-99	d	2	2	21	2	2	0	1	0	0	0	-99	5	2	2	3	1	1	1	1	1	1	0	0	0	0	0	0	0	0	0	0	0	0	0	-99	-66	Mozilla/5.0 (Macintosh; Intel Mac OS X 10_15_6) AppleWebKit/605.1.15 (KHTML, like Gecko) Version/14.0.3 Safari/605.1.15	-99
197	0	0	31	5822659	-77	953	-77	-77	-99	-99	d	3	12	27	2	2	0	1	0	0	0	-99	6	5	4	5	4	4	6	2	3	4	7	7	7	5	3	3	7	6	4	4	4	4	4	-99	-66	Mozilla/5.0 (Windows NT 10.0; Win64; x64; rv:87.0) Gecko/20100101 Firefox/87.0	-99
198	0	0	31	5822659	-77	1241	-77	-77	-99	-99	d	2	7	29	2	2	1	0	0	0	0	-99	7	6	2	3	2	2	5	2	1	1	7	6	5	7	3	2	5	4	3	4	3	2	2	Eine Online-Vorlesung und Handout, die man runterladen kann. Klare Auflistung von Argumente gegen Impfgegner. Gut aufgearbeitet Infos zu COVID. Studenten auf dem laufenden halten über Impfungen etc/ Verteiler	-66	Mozilla/5.0 (iPhone; CPU iPhone OS 14_4 like Mac OS X) AppleWebKit/605.1.15 (KHTML, like Gecko) Version/14.0.3 Mobile/15E148 Safari/604.1	-99
199	0	0	31	5822659	-77	988	-77	-77	-99	-99	d	2	10	32	2	2	1	0	0	0	0	-99	2	2	2	2	2	2	2	2	2	2	6	6	5	5	5	5	4	4	6	2	2	6	6	-99	-66	Mozilla/5.0 (Macintosh; Intel Mac OS X 10_14_6) AppleWebKit/605.1.15 (KHTML, like Gecko) Version/14.0.3 Safari/605.1.15	-99
200	0	0	31	5822659	-77	945	-77	-77	-99	-99	d	3	12	26	2	2	1	1	0	0	0	-99	7	7	7	7	2	1	6	6	3	4	7	5	7	4	7	4	7	7	4	4	4	4	4	-99	-66	Mozilla/5.0 (Windows NT 10.0; Win64; x64; rv:87.0) Gecko/20100101 Firefox/87.0	-99
202	0	0	31	5822659	-77	1667	-77	-77	-99	-99	d	2	8	22	2	2	1	0	0	0	0	-99	5	5	4	4	5	2	5	5	2	2	7	6	6	5	5	3	7	7	6	4	6	4	4	-99	-66	Mozilla/5.0 (Linux; Android 8.0.0; SAMSUNG SM-G930F) AppleWebKit/537.36 (KHTML, like Gecko) SamsungBrowser/13.2 Chrome/83.0.4103.106 Mobile Safari/537.36	-99
203	0	0	31	5822659	-77	1016	-77	-77	-99	-99	d	2	8	21	2	2	1	0	0	0	0	-99	7	7	7	6	2	3	5	4	3	3	6	4	2	3	1	2	3	1	1	1	0	0	0	-99	-66	Mozilla/5.0 (iPhone; CPU iPhone OS 14_4_1 like Mac OS X) AppleWebKit/605.1.15 (KHTML, like Gecko) Version/14.0.3 Mobile/15E148 Safari/604.1	-99
204	0	0	31	5822659	-77	972	-77	-77	-99	-99	d	2	6	25	2	2	0	1	0	0	0	-99	7	7	7	7	3	1	3	3	3	1	7	7	7	6	7	7	7	6	7	2	4	2	2	-99	-66	Mozilla/5.0 (iPhone; CPU iPhone OS 14_4_2 like Mac OS X) AppleWebKit/605.1.15 (KHTML, like Gecko) Version/14.0.3 Mobile/15E148 Safari/604.1	-99
205	0	0	31	5822659	-77	1474	-77	-77	-99	-99	d	2	6	24	2	2	0	1	0	0	0	-99	4	5	5	4	4	6	3	3	3	3	7	7	6	5	5	5	5	5	3	6	3	3	3	-99	-66	Mozilla/5.0 (iPhone; CPU iPhone OS 14_4 like Mac OS X) AppleWebKit/605.1.15 (KHTML, like Gecko) Version/14.0.3 Mobile/15E148 Safari/604.1	-99
207	0	0	31	5822659	-77	1064	-77	-77	-99	-99	d	3	16	27	2	2	1	0	0	0	0	-99	7	7	6	6	1	1	4	3	1	1	7	7	7	7	7	5	7	7	4	4	4	3	3	Das Thema sollte prinzipiell erst mal vorkommen (abgesehen davon, dass man in der Pädiatrie das Impfschema auswendig lernen muss).	-66	Mozilla/5.0 (Windows NT 10.0; Win64; x64; rv:87.0) Gecko/20100101 Firefox/87.0	-99
208	0	0	31	5822659	-77	1275	-77	-77	-99	-99	d	2	4	20	1	2	1	0	0	0	0	-99	7	7	7	6	1	6	1	1	1	1	6	4	5	6	4	4	6	7	4	4	4	1	1	-99	-66	Mozilla/5.0 (iPhone; CPU iPhone OS 14_5 like Mac OS X) AppleWebKit/605.1.15 (KHTML, like Gecko) Version/14.1 Mobile/15E148 Safari/604.1	-99
209	0	0	31	5822659	-77	1450	-77	-77	-99	-99	d	2	4	22	2	2	1	0	0	0	0	-99	5	5	3	5	3	6	2	2	2	2	7	6	5	6	5	2	6	3	3	4	5	3	3	-99	-66	Mozilla/5.0 (iPhone; CPU iPhone OS 14_4 like Mac OS X) AppleWebKit/605.1.15 (KHTML, like Gecko) CriOS/87.0.4280.77 Mobile/15E148 Safari/604.1	https://student.uniklinikum-leipzig.de/studium/allgemeines_interessantes.php
210	0	0	31	5822659	-77	1197	-77	-77	-99	-99	d	2	8	21	1	2	0	1	0	0	0	-99	5	5	5	5	3	2	5	5	6	6	7	3	4	2	2	5	4	3	7	1	1	3	3	-99	-66	Mozilla/5.0 (iPhone; CPU iPhone OS 14_4 like Mac OS X) AppleWebKit/605.1.15 (KHTML, like Gecko) Version/14.0.3 Mobile/15E148 Safari/604.1	-99
213	0	0	31	5822659	-77	1545	-77	-77	-99	-99	d	2	4	21	1	2	1	0	0	0	0	-99	5	3	1	3	3	2	0	0	0	0	6	6	0	0	0	0	0	0	0	0	0	0	0	-99	-66	Mozilla/5.0 (iPhone; CPU iPhone OS 14_4_1 like Mac OS X) AppleWebKit/605.1.15 (KHTML, like Gecko) Version/14.0.3 Mobile/15E148 Safari/604.1	https://student.uniklinikum-leipzig.de/studium/allgemeines_interessantes.php
212	0	0	31	5822659	-77	1096	-77	-77	-99	-99	d	2	6	23	2	2	1	1	0	0	0	-99	5	6	1	1	2	2	2	2	2	1	5	5	3	1	1	1	3	1	1	3	1	1	1	-99	-66	Mozilla/5.0 (Macintosh; Intel Mac OS X 10_15_7) AppleWebKit/605.1.15 (KHTML, like Gecko) Version/13.1.3 Safari/605.1.15	-99
214	0	0	31	5822659	-77	894	-77	-77	-99	-99	d	2	2	30	1	2	1	0	0	0	0	-99	5	5	5	3	3	4	4	4	4	4	6	6	6	6	6	6	6	7	4	6	6	5	6	-99	-66	Mozilla/5.0 (Windows NT 10.0; Win64; x64; rv:87.0) Gecko/20100101 Firefox/87.0	-99
215	0	0	31	5822659	-77	1401	-77	-77	-99	-99	d	3	12	24	2	2	1	1	0	0	0	-99	6	5	4	5	5	6	6	4	3	5	5	6	6	5	5	4	4	5	5	3	4	5	5	-99	-66	Mozilla/5.0 (Windows NT 10.0; Win64; x64) AppleWebKit/537.36 (KHTML, like Gecko) Chrome/89.0.4389.114 Safari/537.36	https://student.uniklinikum-leipzig.de/
216	0	0	31	5822659	-77	768	-77	-77	-99	-99	d	2	5	21	2	2	1	0	0	0	0	-99	7	7	7	7	1	1	1	1	1	1	7	7	7	7	4	7	7	7	7	7	7	4	4	-99	-66	Mozilla/5.0 (iPhone; CPU iPhone OS 14_4_1 like Mac OS X) AppleWebKit/605.1.15 (KHTML, like Gecko) Version/14.0.3 Mobile/15E148 Safari/604.1	-99
218	0	0	31	5822659	-77	922	-77	-77	-99	-99	d	2	4	21	2	2	0	1	0	0	0	-99	6	6	6	6	2	2	5	2	3	2	6	6	6	6	5	5	6	6	3	6	5	2	2	-99	-66	Mozilla/5.0 (Linux; Android 10; EML-L29) AppleWebKit/537.36 (KHTML, like Gecko) Chrome/89.0.4389.105 Mobile Safari/537.36	-99
219	0	0	31	5822659	-77	1333	-77	-77	-99	-99	d	2	5	22	2	2	1	0	0	0	0	-99	6	7	6	6	1	1	1	1	1	1	7	7	7	4	7	7	4	7	4	7	6	2	2	-99	-66	Mozilla/5.0 (iPhone; CPU iPhone OS 14_4_1 like Mac OS X) AppleWebKit/605.1.15 (KHTML, like Gecko) Version/14.0.3 Mobile/15E148 Safari/604.1	-99
220	0	0	31	5822659	-77	1109	-77	-77	-99	-99	d	5	6	32	1	2	1	0	0	0	0	-99	5	5	6	6	1	1	7	6	5	4	7	7	7	7	7	7	7	4	4	4	4	4	4	-99	-66	Mozilla/5.0 (iPhone; CPU iPhone OS 14_4 like Mac OS X) AppleWebKit/605.1.15 (KHTML, like Gecko) Version/14.0.3 Mobile/15E148 Safari/604.1	-99
221	0	0	31	5822659	-77	698	-77	-77	-99	-99	d	2	4	20	2	2	1	0	0	0	0	-99	7	7	5	3	1	2	1	2	1	1	7	7	7	7	7	7	7	7	7	7	7	4	4	-99	-66	Mozilla/5.0 (iPhone; CPU iPhone OS 14_4_2 like Mac OS X) AppleWebKit/605.1.15 (KHTML, like Gecko) Version/14.0.3 Mobile/15E148 Safari/604.1	-99
222	0	0	31	5822659	-77	913	-77	-77	-99	-99	d	2	4	27	2	2	1	0	0	0	0	-99	7	7	7	7	1	1	1	1	1	1	7	7	7	7	7	7	7	7	1	7	3	4	4	-99	-66	Mozilla/5.0 (iPhone; CPU iPhone OS 14_4_2 like Mac OS X) AppleWebKit/605.1.15 (KHTML, like Gecko) Version/14.0.3 Mobile/15E148 Safari/604.1	-99
226	0	0	31	5822659	-77	2991	-77	-77	-99	-99	d	2	2	26	1	2	1	0	0	0	0	-99	3	4	4	5	5	6	3	4	3	2	5	4	4	5	4	4	5	4	2	5	4	3	5	-99	-66	Mozilla/5.0 (Windows NT 10.0; Win64; x64) AppleWebKit/537.36 (KHTML, like Gecko) Chrome/89.0.4389.90 Safari/537.36	https://student.uniklinikum-leipzig.de/
1347	0	0	31	5822659	-77	860	-77	-77	-99	-99	d	2	4	23	2	2	1	0	0	0	0	-99	6	6	0	0	1	1	2	1	1	2	7	6	7	7	6	5	6	7	4	4	6	6	7	-99	-99	Mozilla/5.0 (Macintosh; Intel Mac OS X 10_15_6) AppleWebKit/605.1.15 (KHTML, like Gecko) Version/14.0.3 Safari/605.1.15	-99
227	0	0	31	5822659	-77	1306	-77	-77	-99	-99	d	2	7	37	2	2	1	0	0	0	0	-99	6	6	5	0	0	0	0	0	0	0	7	6	4	5	4	5	5	4	7	5	7	5	6	-99	-66	Mozilla/5.0 (Windows NT 10.0; Win64; x64) AppleWebKit/537.36 (KHTML, like Gecko) Chrome/89.0.4389.90 Safari/537.36	-99
224	0	0	31	5822659	-77	889	-77	-77	-99	-99	d	2	3	21	2	2	0	1	0	0	0	-99	3	6	3	3	2	2	2	2	2	4	7	7	7	7	7	7	7	7	7	7	7	7	7	-99	-66	Mozilla/5.0 (iPhone; CPU iPhone OS 14_4_1 like Mac OS X) AppleWebKit/605.1.15 (KHTML, like Gecko) Version/14.0.3 Mobile/15E148 Safari/604.1	-99
228	0	0	31	5822659	-77	763	-77	-77	-99	-99	d	2	4	21	2	2	1	0	0	0	0	-99	7	4	5	5	3	3	3	2	2	2	7	7	7	7	5	5	7	5	5	2	2	2	2	-99	-66	Mozilla/5.0 (Android 11; Mobile; rv:87.0) Gecko/87.0 Firefox/87.0	-99
229	0	0	32	5822659	-77	-1	-77	-77	-99	-99	d	5	6	23	2	2	1	0	0	0	0	-99	5	5	4	3	1	1	1	1	1	1	7	7	7	7	7	7	7	7	2	6	4	4	4	-99	-99	Mozilla/5.0 (iPhone; CPU iPhone OS 14_4_2 like Mac OS X) AppleWebKit/605.1.15 (KHTML, like Gecko) Version/14.0.3 Mobile/15E148 Safari/604.1	-99
231	0	0	31	5822659	-77	2629	-77	-77	-99	-99	d	2	3	19	2	2	0	1	0	0	0	-99	4	3	4	4	4	1	1	1	1	1	7	6	7	6	6	6	5	5	2	6	4	4	4	-99	-66	Mozilla/5.0 (iPhone; CPU iPhone OS 14_4_2 like Mac OS X) AppleWebKit/605.1.15 (KHTML, like Gecko) Version/14.0.3 Mobile/15E148 Safari/604.1	-99
234	0	0	31	5822659	-77	1031	-77	-77	-99	-99	d	2	2	19	2	2	0	1	0	0	0	-99	7	7	7	7	1	1	1	1	1	1	7	7	7	1	7	7	7	7	7	7	7	1	1	In dem er erstmal stattfindet	-66	Mozilla/5.0 (Macintosh; Intel Mac OS X 10_15_7) AppleWebKit/605.1.15 (KHTML, like Gecko) Version/14.0.3 Safari/605.1.15	-99
235	0	0	31	5822659	-77	1041	-77	-77	-99	-99	d	2	1	19	2	2	1	0	0	0	0	-99	5	5	1	1	5	2	2	2	0	0	0	0	0	0	0	0	0	0	0	0	0	0	0	-99	-66	Mozilla/5.0 (Linux; Android 9; STF-L09) AppleWebKit/537.36 (KHTML, like Gecko) Chrome/89.0.4389.105 Mobile Safari/537.36	android-app://com.google.android.gm/
239	0	0	31	5812245	-77	15	-77	-77	-99	-99	d	1	-66	-66	-77	-77	-77	-77	-77	-77	-77	-66	-77	-77	-77	-77	-77	-77	-77	-77	-77	-77	-77	-77	-77	-77	-77	-77	-77	-77	-77	-77	-77	-77	-77	-66	-66	Mozilla/5.0 (Linux; Android 9; SNE-LX1) AppleWebKit/537.36 (KHTML, like Gecko) Chrome/89.0.4389.105 Mobile Safari/537.36	-99
238	0	0	31	5822659	-77	1033	-77	-77	-99	-99	d	5	2	24	2	2	1	0	0	0	0	-99	7	7	5	4	1	1	1	1	1	1	5	6	4	3	4	3	4	3	3	3	3	2	2	-99	-66	Mozilla/5.0 (iPhone; CPU iPhone OS 14_4_2 like Mac OS X) AppleWebKit/605.1.15 (KHTML, like Gecko) Version/14.0.3 Mobile/15E148 Safari/604.1	-99
241	0	0	31	5822659	-77	1382	-77	-77	-99	-99	d	2	5	25	1	2	0	1	0	0	0	-99	4	4	6	6	6	6	6	6	6	6	5	3	1	1	1	1	1	1	7	1	1	1	1	-99	-66	Mozilla/5.0 (Linux; Android 11; SAMSUNG SM-G973F) AppleWebKit/537.36 (KHTML, like Gecko) SamsungBrowser/13.2 Chrome/83.0.4103.106 Mobile Safari/537.36	-99
242	0	0	31	5822659	-77	758	-77	-77	-99	-99	d	2	1	21	1	2	0	1	0	0	0	-99	3	6	6	6	0	0	0	0	0	0	0	0	0	0	0	0	0	0	0	0	0	0	0	-99	-66	Mozilla/5.0 (Linux; Android 10; SM-G960F) AppleWebKit/537.36 (KHTML, like Gecko) Chrome/89.0.4389.105 Mobile Safari/537.36	android-app://com.google.android.gm/
246	0	0	31	5822659	-77	1007	-77	-77	-99	-99	d	2	2	25	1	2	1	0	0	0	0	-99	4	4	5	5	4	4	4	4	4	4	7	4	4	4	4	4	5	4	4	4	4	4	4	-99	-66	Mozilla/5.0 (Windows NT 10.0; Win64; x64; rv:86.0) Gecko/20100101 Firefox/86.0	-99
244	0	0	31	5822659	-77	1580	-77	-77	-99	-99	d	2	1	22	2	2	0	1	0	0	0	-99	5	5	4	3	5	1	1	1	1	1	7	6	6	5	4	2	5	6	7	2	4	2	2	-99	-66	Mozilla/5.0 (iPhone; CPU iPhone OS 14_4_1 like Mac OS X) AppleWebKit/605.1.15 (KHTML, like Gecko) Version/14.0.3 Mobile/15E148 Safari/604.1	-99
245	0	0	31	5822659	-77	1522	-77	-77	-99	-99	d	2	5	20	2	2	1	0	0	0	0	-99	6	7	5	5	3	2	2	1	1	2	7	7	6	5	5	5	6	5	3	5	6	6	6	-99	-66	Mozilla/5.0 (Linux; Android 9; SAMSUNG SM-A530F) AppleWebKit/537.36 (KHTML, like Gecko) SamsungBrowser/13.2 Chrome/83.0.4103.106 Mobile Safari/537.36	-99
247	0	0	31	5822659	-77	635	-77	-77	-99	-99	d	5	3	19	2	2	0	1	0	0	0	-99	2	2	2	2	3	2	2	2	2	2	6	6	6	6	6	6	4	7	7	2	0	4	5	-99	-66	Mozilla/5.0 (Macintosh; Intel Mac OS X 10_15_6) AppleWebKit/605.1.15 (KHTML, like Gecko) Version/14.0.3 Safari/605.1.15	-99
249	0	0	31	5822659	-77	1243	-77	-77	-99	-99	d	2	4	20	2	2	1	0	0	0	0	-99	4	2	5	5	2	2	2	3	3	3	5	6	6	5	5	4	5	6	6	3	4	4	4	-99	-66	Mozilla/5.0 (iPhone; CPU iPhone OS 14_4_2 like Mac OS X) AppleWebKit/605.1.15 (KHTML, like Gecko) Version/14.0.3 Mobile/15E148 Safari/604.1	-99
251	0	0	31	5822659	-77	1694	-77	-77	-99	-99	d	2	3	28	1	2	1	0	0	0	0	-99	6	6	6	6	1	1	1	1	1	1	7	7	7	7	7	5	7	7	7	2	4	4	4	-99	-66	Mozilla/5.0 (iPhone; CPU iPhone OS 14_4_2 like Mac OS X) AppleWebKit/605.1.15 (KHTML, like Gecko) Version/14.0.3 Mobile/15E148 Safari/604.1	-99
253	0	0	32	5822659	-77	-1	-77	-77	-99	-99	d	2	3	28	1	2	1	0	0	0	0	-99	5	3	6	5	1	1	1	1	1	1	6	4	4	6	2	2	6	4	6	4	4	2	2	-99	-66	Mozilla/5.0 (Linux; Android 11; SM-G781B) AppleWebKit/537.36 (KHTML, like Gecko) Chrome/87.0.4280.141 Mobile Safari/537.36 OPR/62.3.3146.57763	-99
252	0	0	31	5822659	-77	687	-77	-77	-99	-99	d	5	4	20	2	2	1	0	0	0	0	-99	7	7	7	7	1	1	1	1	1	1	5	5	5	6	6	5	4	5	5	4	4	5	5	-99	-66	Mozilla/5.0 (iPhone; CPU iPhone OS 14_4_2 like Mac OS X) AppleWebKit/605.1.15 (KHTML, like Gecko) Version/14.0.3 Mobile/15E148 Safari/604.1	-99
264	0	0	31	5822659	-77	3918	-77	-77	-99	-99	d	5	5	24	2	2	1	0	0	0	0	-99	4	7	5	4	1	1	2	1	2	2	7	7	7	7	7	7	7	7	2	7	7	2	2	-99	-99	Mozilla/5.0 (Linux; Android 10; EML-L29) AppleWebKit/537.36 (KHTML, like Gecko) Chrome/89.0.4389.105 Mobile Safari/537.36	android-app://com.google.android.gm/
254	0	0	31	5822659	-77	1141	-77	-77	-99	-99	d	2	4	26	2	2	1	0	0	0	0	-99	4	4	3	4	3	3	2	2	2	2	6	6	6	5	5	5	5	4	3	5	6	3	3	-99	-66	Mozilla/5.0 (iPhone; CPU iPhone OS 14_4_2 like Mac OS X) AppleWebKit/605.1.15 (KHTML, like Gecko) Version/14.0.3 Mobile/15E148 Safari/604.1	-99
278	0	0	31	5812245	-77	10	-77	-77	-99	-99	d	1	-66	-66	-77	-77	-77	-77	-77	-77	-77	-66	-77	-77	-77	-77	-77	-77	-77	-77	-77	-77	-77	-77	-77	-77	-77	-77	-77	-77	-77	-77	-77	-77	-77	-66	-66	Mozilla/5.0 (iPhone; CPU iPhone OS 14_4_1 like Mac OS X) AppleWebKit/605.1.15 (KHTML, like Gecko) Version/14.0.3 Mobile/15E148 Safari/604.1	-99
256	0	0	31	5812245	-77	18	-77	-77	-99	-99	d	1	-66	-66	-77	-77	-77	-77	-77	-77	-77	-66	-77	-77	-77	-77	-77	-77	-77	-77	-77	-77	-77	-77	-77	-77	-77	-77	-77	-77	-77	-77	-77	-77	-77	-66	-66	Mozilla/5.0 (iPhone; CPU iPhone OS 14_4_1 like Mac OS X) AppleWebKit/605.1.15 (KHTML, like Gecko) Version/14.0.3 Mobile/15E148 Safari/604.1	-99
255	0	0	31	5822659	-77	936	-77	-77	-99	-99	d	2	5	25	2	2	1	0	0	0	0	-99	4	3	4	4	2	1	1	1	1	1	7	5	5	6	2	4	7	6	2	4	7	5	5	Es wäre schön, wenn wir lernen würde, die publizierten Studien und Reviews zu interpretieren, damit wir eigenständig Schwerpunkte setzen und uns in Primärquellen informieren können.	-66	Mozilla/5.0 (Windows NT 10.0; Win64; x64; rv:87.0) Gecko/20100101 Firefox/87.0	-99
1411	0	0	31	5822659	-77	1728	-77	-77	-99	-99	d	2	4	28	2	2	1	0	0	0	0	-99	4	6	5	5	1	1	0	3	2	1	7	4	7	3	7	5	7	7	4	4	4	1	1	-99	-99	Mozilla/5.0 (Linux; Android 10; Nokia 5.1 Plus) AppleWebKit/537.36 (KHTML, like Gecko) Chrome/89.0.4389.105 Mobile Safari/537.36	android-app://com.google.android.gm/
462	0	0	31	5822659	-77	1056	-77	-77	-99	-99	d	2	3	23	2	2	1	0	0	0	0	-99	1	4	5	5	5	1	4	2	2	2	7	7	7	2	5	4	5	7	7	2	4	1	1	-99	-66	Mozilla/5.0 (iPhone; CPU iPhone OS 14_4_1 like Mac OS X) AppleWebKit/605.1.15 (KHTML, like Gecko) Version/14.0.3 Mobile/15E148 Safari/604.1	-99
257	0	0	31	5822659	-77	897	-77	-77	-99	-99	d	2	2	27	1	2	1	0	0	0	0	-99	6	6	5	5	3	1	1	1	1	1	6	6	6	6	6	5	7	7	7	4	6	6	6	-99	-66	Mozilla/5.0 (Linux; Android 11; SAMSUNG SM-G770F) AppleWebKit/537.36 (KHTML, like Gecko) SamsungBrowser/13.2 Chrome/83.0.4103.106 Mobile Safari/537.36	-99
258	0	0	31	5822659	-77	991	-77	-77	-99	-99	d	5	5	27	2	2	1	0	0	0	0	-99	7	7	7	7	1	1	1	1	1	1	7	7	7	5	7	7	7	7	7	7	7	1	1	-99	-66	Mozilla/5.0 (iPhone; CPU iPhone OS 14_4_1 like Mac OS X) AppleWebKit/605.1.15 (KHTML, like Gecko) Version/14.0.3 Mobile/15E148 Safari/604.1	-99
261	0	0	31	5822659	-77	1956	-77	-77	-99	-99	d	2	8	22	1	2	1	1	0	0	0	-99	6	7	6	6	5	4	6	6	5	5	7	4	5	4	5	5	5	5	6	6	6	1	1	-99	-66	Mozilla/5.0 (Linux; Android 9; VTR-L09) AppleWebKit/537.36 (KHTML, like Gecko) Chrome/88.0.4324.181 Mobile Safari/537.36 (Ecosia android@88.0.4324.181)	-99
263	0	0	31	5822659	-77	1214	-77	-77	-99	-99	d	2	3	25	2	2	1	0	0	0	0	-99	5	5	4	5	3	1	1	1	1	1	7	4	5	5	5	5	5	4	4	4	4	4	4	-99	-66	Mozilla/5.0 (Macintosh; Intel Mac OS X 10_15_6) AppleWebKit/605.1.15 (KHTML, like Gecko) Version/13.1.2 Safari/605.1.15	-99
262	0	0	31	5812245	-77	11	-77	-77	-99	-99	d	1	-66	-66	-77	-77	-77	-77	-77	-77	-77	-66	-77	-77	-77	-77	-77	-77	-77	-77	-77	-77	-77	-77	-77	-77	-77	-77	-77	-77	-77	-77	-77	-77	-77	-66	-66	Mozilla/5.0 (iPhone; CPU iPhone OS 14_4_2 like Mac OS X) AppleWebKit/605.1.15 (KHTML, like Gecko) Version/14.0.3 Mobile/15E148 Safari/604.1	-99
1250	0	0	31	5822659	-77	643	-77	-77	-99	-99	d	2	10	24	2	2	1	1	0	0	0	-99	5	6	3	6	6	5	6	3	2	1	7	7	7	7	7	7	7	7	7	7	7	7	7	-99	-99	Mozilla/5.0 (Windows NT 10.0; Win64; x64) AppleWebKit/537.36 (KHTML, like Gecko) Chrome/89.0.4389.90 Safari/537.36	-99
265	0	0	31	5822659	-77	994	-77	-77	-99	-99	d	2	3	23	1	2	1	0	0	0	0	-99	4	5	5	6	5	3	4	3	2	3	6	6	4	5	3	3	5	4	5	3	3	4	3	-99	-66	Mozilla/5.0 (Linux; Android 10; Armor 7E) AppleWebKit/537.36 (KHTML, like Gecko) Chrome/89.0.4389.105 Mobile Safari/537.36	-99
268	0	0	31	5822659	-77	1003	-77	-77	-99	-99	d	2	4	24	2	2	0	1	0	0	0	-99	7	7	7	5	1	1	1	1	4	1	7	7	5	5	3	4	4	5	4	5	4	4	4	-99	-66	Mozilla/5.0 (Linux; Android 9; SM-G950F) AppleWebKit/537.36 (KHTML, like Gecko) Chrome/89.0.4389.105 Mobile Safari/537.36	android-app://com.google.android.gm/
272	0	0	31	5812245	-77	20	-77	-77	-99	-99	d	1	-66	-66	-77	-77	-77	-77	-77	-77	-77	-66	-77	-77	-77	-77	-77	-77	-77	-77	-77	-77	-77	-77	-77	-77	-77	-77	-77	-77	-77	-77	-77	-77	-77	-66	-66	Mozilla/5.0 (iPhone; CPU iPhone OS 14_4_2 like Mac OS X) AppleWebKit/605.1.15 (KHTML, like Gecko) Version/14.0.3 Mobile/15E148 Safari/604.1	-99
269	0	0	31	5822659	-77	1376	-77	-77	-99	-99	d	2	2	19	2	3	1	1	0	0	0	-99	6	6	6	5	2	5	6	5	2	2	6	6	7	7	7	6	7	6	2	7	5	6	6	-99	-66	Mozilla/5.0 (Linux; Android 11; Mi A3 Build/RKQ1.200903.002; wv) AppleWebKit/537.36 (KHTML, like Gecko) Version/4.0 Chrome/89.0.4389.105 Mobile Safari/537.36 StudoBrowser/4.02.4-android-studo (https://studo.com/studo-browser-information-and-contact)	-99
273	0	0	31	5822659	-77	665	-77	-77	-99	-99	d	2	3	24	2	2	1	0	0	0	0	-99	5	6	5	5	5	5	4	4	4	4	7	6	6	6	5	5	5	6	4	4	6	4	4	-99	-66	Mozilla/5.0 (iPhone; CPU iPhone OS 14_4_2 like Mac OS X) AppleWebKit/605.1.15 (KHTML, like Gecko) Version/14.0.3 Mobile/15E148 Safari/604.1	-99
270	0	0	31	5822659	-77	1218	-77	-77	-99	-99	d	2	3	23	2	2	1	0	0	0	0	-99	7	7	6	7	5	1	1	1	1	1	7	7	7	7	3	3	7	7	1	7	4	1	1	-99	-66	Mozilla/5.0 (iPhone; CPU iPhone OS 14_4_2 like Mac OS X) AppleWebKit/605.1.15 (KHTML, like Gecko) Version/14.0.3 Mobile/15E148 Safari/604.1	-99
277	0	0	31	5822659	-77	860	-77	-77	-99	-99	d	2	3	25	2	2	1	0	0	0	0	-99	6	7	7	5	2	1	1	1	1	1	7	6	5	5	4	3	4	5	6	4	5	3	3	-99	-66	Mozilla/5.0 (iPhone; CPU iPhone OS 14_4_1 like Mac OS X) AppleWebKit/605.1.15 (KHTML, like Gecko) Version/14.0.3 Mobile/15E148 Safari/604.1	-99
784	0	0	31	5822659	-77	1807	-77	-77	-99	-99	d	2	3	26	2	2	1	0	0	0	0	-99	4	4	3	3	2	2	2	2	2	2	6	4	4	0	0	0	0	0	0	0	0	0	0	-99	-99	Mozilla/5.0 (iPhone; CPU iPhone OS 14_4 like Mac OS X) AppleWebKit/605.1.15 (KHTML, like Gecko) Version/14.0.3 Mobile/15E148 Safari/604.1	-99
275	0	0	31	5822659	-77	1397	-77	-77	-99	-99	d	2	5	21	2	2	1	0	0	0	0	-99	6	5	4	5	5	2	6	6	3	3	6	6	6	6	4	6	5	5	2	7	4	2	2	-99	-66	Mozilla/5.0 (iPhone; CPU iPhone OS 14_4_2 like Mac OS X) AppleWebKit/605.1.15 (KHTML, like Gecko) Version/14.0.3 Mobile/15E148 Safari/604.1	-99
274	0	0	31	5812245	-77	15	-77	-77	-99	-99	d	1	-66	-66	-77	-77	-77	-77	-77	-77	-77	-66	-77	-77	-77	-77	-77	-77	-77	-77	-77	-77	-77	-77	-77	-77	-77	-77	-77	-77	-77	-77	-77	-77	-77	-66	-66	Mozilla/5.0 (iPhone; CPU iPhone OS 14_4_1 like Mac OS X) AppleWebKit/605.1.15 (KHTML, like Gecko) Version/14.0.3 Mobile/15E148 Safari/604.1	-99
276	0	0	31	5822659	-77	1113	-77	-77	-99	-99	d	2	3	26	1	2	0	1	0	0	0	-99	6	6	1	2	2	1	1	1	1	1	1	1	1	1	1	1	1	1	4	4	4	2	4	In der Vorklinik keine Relevanz	-66	Mozilla/5.0 (Macintosh; Intel Mac OS X 10_15_6) AppleWebKit/605.1.15 (KHTML, like Gecko) Version/14.0.3 Safari/605.1.15	-99
665	0	0	31	5822659	-77	1364	-77	-77	-99	-99	d	2	9	28	1	2	1	0	0	0	0	-99	6	7	5	7	6	4	6	5	4	4	7	6	6	6	6	7	5	6	7	6	7	5	5	#NAME?	Doppelte Verneinungen sind teils verwirrend.	Mozilla/5.0 (Windows NT 10.0; Win64; x64) AppleWebKit/537.36 (KHTML, like Gecko) Chrome/89.0.4389.114 Safari/537.36	https://deref-gmx.net/
280	0	0	31	5812245	-77	10	-77	-77	-99	-99	d	1	-66	-66	-77	-77	-77	-77	-77	-77	-77	-66	-77	-77	-77	-77	-77	-77	-77	-77	-77	-77	-77	-77	-77	-77	-77	-77	-77	-77	-77	-77	-77	-77	-77	-66	-66	Mozilla/5.0 (Linux; Android 11; KB2003) AppleWebKit/537.36 (KHTML, like Gecko) Chrome/89.0.4389.105 Mobile Safari/537.36	-99
279	0	0	31	5812245	-77	7	-77	-77	-99	-99	d	1	-66	-66	-77	-77	-77	-77	-77	-77	-77	-66	-77	-77	-77	-77	-77	-77	-77	-77	-77	-77	-77	-77	-77	-77	-77	-77	-77	-77	-77	-77	-77	-77	-77	-66	-66	Mozilla/5.0 (iPhone; CPU iPhone OS 14_4_2 like Mac OS X) AppleWebKit/605.1.15 (KHTML, like Gecko) Version/14.0.3 Mobile/15E148 Safari/604.1	-99
282	0	0	31	5822659	-77	1003	-77	-77	-99	-99	d	3	11	29	2	2	1	0	0	0	0	-99	5	5	3	4	3	1	5	6	5	4	7	6	6	6	6	6	5	5	6	6	6	7	7	-99	-66	Mozilla/5.0 (Linux; Android 11; Pixel 4a) AppleWebKit/537.36 (KHTML, like Gecko) Chrome/89.0.4389.105 Mobile Safari/537.36	-99
285	0	0	31	5822659	-77	1035	-77	-77	-99	-99	d	2	10	27	2	2	1	0	0	0	0	-99	7	7	6	6	5	4	7	5	4	1	7	7	7	7	7	6	7	7	5	5	7	3	3	-99	-66	Mozilla/5.0 (iPhone; CPU iPhone OS 14_4_1 like Mac OS X) AppleWebKit/605.1.15 (KHTML, like Gecko) Version/14.0.3 Mobile/15E148 Safari/604.1	-99
284	0	0	31	5822659	-77	693	-77	-77	-99	-99	d	2	9	24	2	2	1	0	0	0	0	-99	7	7	6	5	4	4	6	4	1	2	7	7	7	7	7	7	7	7	7	7	7	5	5	-99	-66	Mozilla/5.0 (Linux; Android 11; Pixel 4a) AppleWebKit/537.36 (KHTML, like Gecko) Chrome/89.0.4389.105 Mobile Safari/537.36	android-app://com.google.android.gm/
286	0	0	31	5829623	-77	38	-77	-77	-99	-99	d	2	4	2	1	2	1	1	0	0	0	-99	-77	-77	-77	-77	-77	-77	-77	-77	-77	-77	-77	-77	-77	-77	-77	-77	-77	-77	-77	-77	-77	-77	-77	-66	-66	Mozilla/5.0 (iPhone; CPU iPhone OS 14_4_2 like Mac OS X) AppleWebKit/605.1.15 (KHTML, like Gecko) Version/14.0.3 Mobile/15E148 Safari/604.1	-99
297	0	0	31	5822659	-77	2674	-77	-77	-99	-99	d	2	1	20	1	2	0	1	0	0	0	-99	6	6	4	4	6	6	1	2	4	5	7	7	7	1	4	7	7	4	4	4	4	4	4	-99	-66	Mozilla/5.0 (iPhone; CPU iPhone OS 14_4 like Mac OS X) AppleWebKit/605.1.15 (KHTML, like Gecko) Version/14.0.3 Mobile/15E148 Safari/604.1	-99
287	0	0	31	5822659	-77	3081	-77	-77	-99	-99	d	2	5	25	2	2	1	0	0	0	0	-99	4	4	2	3	3	1	3	3	3	2	5	5	4	5	5	5	5	5	3	6	4	4	4	-99	-66	Mozilla/5.0 (Linux; Android 9; SM-G950F) AppleWebKit/537.36 (KHTML, like Gecko) Chrome/89.0.4389.105 Mobile Safari/537.36	-99
289	0	0	31	5822659	-77	931	-77	-77	-99	-99	d	3	11	26	2	2	0	1	0	0	0	-99	4	4	4	4	4	4	6	6	6	4	4	4	4	1	1	2	1	4	4	4	4	4	4	Menschen frei entscheiden lassen ob Sie sich impfen lassen möchten und niemanden dazu überreden!	-66	Mozilla/5.0 (Linux; Android 8.0.0; SAMSUNG SM-G930U) AppleWebKit/537.36 (KHTML, like Gecko) SamsungBrowser/13.2 Chrome/83.0.4103.106 Mobile Safari/537.36	-99
288	0	0	31	5822659	-77	1232	-77	-77	-99	-99	d	2	5	21	2	2	0	1	0	0	0	-99	7	7	5	5	2	2	1	1	2	1	7	7	7	7	7	7	7	7	7	2	5	2	2	-99	-66	Mozilla/5.0 (Linux; Android 11; Pixel 2 XL) AppleWebKit/537.36 (KHTML, like Gecko) Chrome/89.0.4389.105 Mobile Safari/537.36	android-app://com.google.android.gm/
294	0	0	31	5822659	-77	1314	-77	-77	-99	-99	d	2	9	26	2	2	1	1	0	0	0	-99	5	5	4	4	1	1	1	1	1	1	7	7	7	6	6	6	6	7	4	4	7	4	4	-99	-66	Mozilla/5.0 (Linux; Android 10; HMA-L09) AppleWebKit/537.36 (KHTML, like Gecko) Chrome/89.0.4389.105 Mobile Safari/537.36	android-app://com.google.android.gm/
292	0	0	31	5822659	-77	1414	-77	-77	-99	-99	d	2	6	21	2	2	1	0	0	0	0	-99	4	5	5	4	2	1	5	5	2	2	6	4	4	5	4	3	4	5	4	4	6	4	4	-99	-66	Mozilla/5.0 (iPhone; CPU iPhone OS 14_4_2 like Mac OS X) AppleWebKit/605.1.15 (KHTML, like Gecko) Version/14.0.3 Mobile/15E148 Safari/604.1	-99
291	0	0	31	5812245	-77	9	-77	-77	-99	-99	d	1	-66	-66	-77	-77	-77	-77	-77	-77	-77	-66	-77	-77	-77	-77	-77	-77	-77	-77	-77	-77	-77	-77	-77	-77	-77	-77	-77	-77	-77	-77	-77	-77	-77	-66	-66	Mozilla/5.0 (iPhone; CPU iPhone OS 14_4_2 like Mac OS X) AppleWebKit/605.1.15 (KHTML, like Gecko) Version/14.0.3 Mobile/15E148 Safari/604.1	-99
1285	0	0	31	5822659	-77	822	-77	-77	-99	-99	d	2	10	22	2	2	1	0	0	0	0	-99	7	7	7	7	0	0	0	0	0	0	0	0	0	0	0	0	0	0	0	0	0	0	0	-99	-99	Mozilla/5.0 (Macintosh; Intel Mac OS X 10_15_6) AppleWebKit/605.1.15 (KHTML, like Gecko) Version/14.0.3 Safari/605.1.15	-99
295	0	0	31	5822659	-77	922	-77	-77	-99	-99	d	3	12	46	2	2	0	1	0	0	0	-99	7	7	5	6	3	3	6	6	4	4	7	7	7	7	5	5	7	7	5	5	4	7	5	-99	-66	Mozilla/5.0 (iPhone; CPU iPhone OS 12_4_9 like Mac OS X) AppleWebKit/605.1.15 (KHTML, like Gecko) Version/12.1.2 Mobile/15E148 Safari/604.1	-99
296	0	0	31	5812245	-77	14	-77	-77	-99	-99	d	1	-66	-66	-77	-77	-77	-77	-77	-77	-77	-66	-77	-77	-77	-77	-77	-77	-77	-77	-77	-77	-77	-77	-77	-77	-77	-77	-77	-77	-77	-77	-77	-77	-77	-66	-66	Mozilla/5.0 (iPhone; CPU iPhone OS 14_4_2 like Mac OS X) AppleWebKit/605.1.15 (KHTML, like Gecko) Version/14.0.3 Mobile/15E148 Safari/604.1	-99
3484	0	0	31	5822659	-77	907	-77	-77	-99	-99	d	2	8	23	2	2	1	1	0	0	0	-99	4	4	2	2	2	2	5	4	2	2	5	5	5	5	2	5	5	3	1	6	4	1	5	-99	-99	Mozilla/5.0 (Windows NT 10.0; Win64; x64; rv:87.0) Gecko/20100101 Firefox/87.0	-99
304	0	0	31	5822659	-77	1201	-77	-77	-99	-99	d	2	5	21	2	2	1	0	0	0	0	-99	3	3	4	5	2	2	2	2	2	2	7	6	3	5	5	5	5	5	4	6	6	4	4	-99	-66	Mozilla/5.0 (Macintosh; Intel Mac OS X 10_15_6) AppleWebKit/605.1.15 (KHTML, like Gecko) Version/14.0.3 Safari/605.1.15	-99
298	0	0	31	5822659	-77	1116	-77	-77	-99	-99	d	2	9	34	1	2	1	0	0	0	0	-99	7	7	7	7	2	2	6	5	4	3	7	7	7	7	4	5	7	5	1	7	4	6	4	-99	-66	Mozilla/5.0 (iPhone; CPU iPhone OS 14_4_1 like Mac OS X) AppleWebKit/605.1.15 (KHTML, like Gecko) Version/14.0.3 Mobile/15E148 Safari/604.1	-99
299	0	0	31	5822659	-77	838	-77	-77	-99	-99	d	2	9	23	2	2	1	0	0	0	0	-99	6	6	6	5	2	2	4	4	4	1	7	6	5	4	2	5	3	5	4	4	7	4	4	-99	-66	Mozilla/5.0 (Macintosh; Intel Mac OS X 10_15_7) AppleWebKit/605.1.15 (KHTML, like Gecko) Version/14.0 Safari/605.1.15	-99
300	0	0	31	5822659	-77	745	-77	-77	-99	-99	d	3	12	28	1	2	1	0	0	0	0	-99	7	7	6	6	1	1	3	1	1	1	7	7	7	7	6	6	6	7	7	3	6	2	6	-99	-66	Mozilla/5.0 (iPhone; CPU iPhone OS 14_4_1 like Mac OS X) AppleWebKit/605.1.15 (KHTML, like Gecko) Version/14.0.3 Mobile/15E148 Safari/604.1	-99
303	0	0	31	5822659	-77	1068	-77	-77	-99	-99	d	2	2	18	2	2	1	0	0	0	0	-99	6	1	2	4	1	1	2	2	2	2	7	7	7	4	7	7	7	7	4	7	5	5	5	-99	-66	Mozilla/5.0 (iPhone; CPU iPhone OS 14_4_2 like Mac OS X) AppleWebKit/605.1.15 (KHTML, like Gecko) Version/14.0.3 Mobile/15E148 Safari/604.1	-99
302	0	0	31	5822659	-77	990	-77	-77	-99	-99	d	2	7	26	1	2	1	0	0	0	0	-99	6	7	7	7	1	1	1	5	1	1	7	7	7	7	7	5	7	7	4	4	7	7	7	-99	-66	Mozilla/5.0 (iPhone; CPU iPhone OS 14_4_2 like Mac OS X) AppleWebKit/605.1.15 (KHTML, like Gecko) Version/14.0.3 Mobile/15E148 Safari/604.1	-99
310	0	0	31	5822659	-77	1092	-77	-77	-99	-99	d	2	3	21	2	2	1	0	0	0	0	-99	3	1	1	1	1	1	1	1	1	1	7	4	4	4	4	4	4	4	4	4	4	4	4	Das ist kein Stoff für die Vorklinik. Deswegen kann ich das nur schlecht bewerten.	-66	Mozilla/5.0 (Windows NT 10.0; Win64; x64) AppleWebKit/537.36 (KHTML, like Gecko) Chrome/89.0.4389.90 Safari/537.36	-99
5557	0	0	31	5822659	-77	1387	-77	-77	-99	-99	d	2	7	21	1	2	1	0	0	0	0	-99	7	7	6	5	2	1	3	2	5	5	7	5	6	1	3	1	2	7	7	1	1	2	3	Es wäre gut das Thema einfach in den entsprechenden Bereichen der Physiologie und ärztlichen Gesprächsführung mit zu behandeln. Wichtig ist mir dabei einen differenzierten und patientenorientierten Umgang mit Impfungen zu lehren, und nicht das Individuum hinter der Gesellschaft zurückzustellen. Die Hintergründe einer Impfstoffzulassung sollten ebenfalls gelehrt werden, aber nur wenn sie sich wese…	-99	Mozilla/5.0 (Macintosh; Intel Mac OS X 10_15_6) AppleWebKit/605.1.15 (KHTML, like Gecko) Version/14.0.3 Safari/605.1.15	-99
305	0	0	32	5822659	-77	-1	-77	-77	-99	-99	d	2	10	27	1	2	1	0	0	0	0	-99	5	5	5	4	2	2	5	5	4	4	6	5	5	5	6	5	6	5	4	4	4	4	4	-99	-66	Mozilla/5.0 (Windows NT 10.0; Win64; x64) AppleWebKit/537.36 (KHTML, like Gecko) Chrome/89.0.4389.90 Safari/537.36	-99
306	0	0	31	5812245	-77	10	-77	-77	-99	-99	d	1	-66	-66	-77	-77	-77	-77	-77	-77	-77	-66	-77	-77	-77	-77	-77	-77	-77	-77	-77	-77	-77	-77	-77	-77	-77	-77	-77	-77	-77	-77	-77	-77	-77	-66	-66	Mozilla/5.0 (iPhone; CPU iPhone OS 14_4_1 like Mac OS X) AppleWebKit/605.1.15 (KHTML, like Gecko) Version/14.0.3 Mobile/15E148 Safari/604.1	-99
315	0	0	31	5822659	-77	1859	-77	-77	-99	-99	d	2	8	24	2	2	1	0	0	0	0	-99	2	2	1	1	0	0	0	0	0	0	0	0	0	0	0	0	0	0	0	0	0	0	0	-99	-66	Mozilla/5.0 (Windows NT 10.0; Win64; x64) AppleWebKit/537.36 (KHTML, like Gecko) Chrome/89.0.4389.114 Safari/537.36	-99
309	0	0	31	5822659	-77	1712	-77	-77	-99	-99	d	3	13	30	2	2	1	0	0	0	0	-99	6	6	4	4	2	2	6	6	5	5	7	5	6	5	5	5	5	5	5	5	5	5	5	-99	-66	Mozilla/5.0 (Linux; U; Android 10; de-de; Mi 9T Build/QKQ1.190825.002) AppleWebKit/537.36 (KHTML, like Gecko) Version/4.0 Chrome/79.0.3945.147 Mobile Safari/537.36 XiaoMi/MiuiBrowser/12.9.3-gn	-99
314	0	0	31	5822659	-77	1013	-77	-77	-99	-99	d	3	12	32	2	2	1	0	0	0	0	-99	6	6	4	3	1	1	5	5	5	3	7	7	7	7	6	6	6	6	6	6	6	3	2	-99	-66	Mozilla/5.0 (Linux; Android 8.0.0; SM-G930F) AppleWebKit/537.36 (KHTML, like Gecko) Chrome/89.0.4389.105 Mobile Safari/537.36	-99
312	0	0	31	5812245	-77	16	-77	-77	-99	-99	d	1	-66	-66	-77	-77	-77	-77	-77	-77	-77	-66	-77	-77	-77	-77	-77	-77	-77	-77	-77	-77	-77	-77	-77	-77	-77	-77	-77	-77	-77	-77	-77	-77	-77	-66	-66	Mozilla/5.0 (iPhone; CPU iPhone OS 14_4_1 like Mac OS X) AppleWebKit/605.1.15 (KHTML, like Gecko) Version/14.0.3 Mobile/15E148 Safari/604.1	-99
311	0	0	31	5822659	-77	525	-77	-77	-99	-99	d	2	10	27	2	2	1	0	0	0	0	-99	5	5	5	6	4	3	6	4	3	4	6	6	4	6	5	3	6	6	3	5	6	5	5	-99	-66	Mozilla/5.0 (Macintosh; Intel Mac OS X 10_15_7) AppleWebKit/605.1.15 (KHTML, like Gecko) Version/14.0 Safari/605.1.15	-99
313	0	0	31	5822659	-77	827	-77	-77	-99	-99	d	3	13	27	2	2	1	0	0	0	0	-99	4	6	6	5	2	2	6	7	6	2	6	6	4	7	1	1	6	7	7	1	4	4	4	-99	-66	Mozilla/5.0 (iPhone; CPU iPhone OS 14_4_2 like Mac OS X) AppleWebKit/605.1.15 (KHTML, like Gecko) Version/14.0.3 Mobile/15E148 Safari/604.1	-99
316	0	0	32	5822659	-77	-1	-77	-77	-99	-99	d	2	6	22	2	2	1	0	0	0	0	-99	7	7	5	4	6	3	0	0	0	0	0	0	0	0	0	0	0	0	0	0	0	0	0	-99	-66	Mozilla/5.0 (Linux; Android 11; SM-G973F) AppleWebKit/537.36 (KHTML, like Gecko) Chrome/89.0.4389.105 Mobile Safari/537.36	-99
317	0	0	31	5822659	-77	581	-77	-77	-99	-99	d	2	4	29	1	2	1	0	0	0	0	-99	6	6	5	5	4	4	4	4	4	4	4	4	4	4	4	4	4	4	4	4	4	4	4	-99	-66	Mozilla/5.0 (iPhone; CPU iPhone OS 14_4_2 like Mac OS X) AppleWebKit/605.1.15 (KHTML, like Gecko) Version/14.0.3 Mobile/15E148 Safari/604.1	-99
318	0	0	31	5822659	-77	1967	-77	-77	-99	-99	d	2	3	19	2	2	1	0	0	0	0	-99	6	6	4	5	2	1	3	2	2	1	5	6	6	6	6	6	6	5	6	4	6	6	5	-99	-66	Mozilla/5.0 (iPhone; CPU iPhone OS 14_4_1 like Mac OS X) AppleWebKit/605.1.15 (KHTML, like Gecko) Version/14.0.3 Mobile/15E148 Safari/604.1	-99
319	0	0	31	5822659	-77	848	-77	-77	-99	-99	d	2	10	25	2	2	1	0	0	0	0	-99	6	6	6	6	3	3	7	7	7	7	5	7	2	2	7	5	2	7	5	3	7	1	1	-99	-66	Mozilla/5.0 (Linux; Android 9; SAMSUNG SM-G950F) AppleWebKit/537.36 (KHTML, like Gecko) SamsungBrowser/13.2 Chrome/83.0.4103.106 Mobile Safari/537.36	-99
320	0	0	31	5822659	-77	1442	-77	-77	-99	-99	d	2	10	32	2	2	1	1	0	0	0	-99	4	5	5	5	3	1	1	1	2	1	7	7	4	7	2	3	5	5	7	7	7	1	1	Es wäre schön wenn die Universitätsmedizin Mainz es wie Gießen und andere Universitäten endlich schaffen würde ihre Medizinstudenten zu impfen, wenn wir schon gezwungen sind weiter unsere Famulaturen zu machen.	-66	Mozilla/5.0 (iPhone; CPU iPhone OS 14_4_2 like Mac OS X) AppleWebKit/605.1.15 (KHTML, like Gecko) Version/14.0.3 Mobile/15E148 Safari/604.1	-99
323	0	0	31	5822659	-77	1419	-77	-77	-99	-99	d	2	7	24	2	2	1	0	0	0	0	-99	6	6	6	6	4	5	7	6	5	5	6	5	7	7	4	6	6	4	4	2	5	3	3	-99	-66	Mozilla/5.0 (Macintosh; Intel Mac OS X 10_15_6) AppleWebKit/605.1.15 (KHTML, like Gecko) Version/14.0.3 Safari/605.1.15	https://student.uniklinikum-leipzig.de/studium/allgemeines_interessantes.php
321	0	0	31	5822659	-77	678	-77	-77	-99	-99	d	3	13	27	1	2	0	1	0	0	0	-99	7	7	7	7	3	1	6	7	2	2	7	7	7	7	5	3	5	6	4	4	4	2	1	-99	-66	Mozilla/5.0 (iPhone; CPU iPhone OS 14_4_2 like Mac OS X) AppleWebKit/605.1.15 (KHTML, like Gecko) Version/14.0.3 Mobile/15E148 Safari/604.1	-99
322	0	0	31	5822659	-77	1183	-77	-77	-99	-99	d	2	7	27	2	2	1	0	0	0	0	-99	7	7	5	5	1	1	5	5	3	1	7	7	7	7	7	7	7	7	4	4	4	7	7	Sehr guter Ansatz- der mir in der Lehre aktuell fehlt ! Diskussionsrunden zum Thema Impfen im Allgemeinen finde ich sehr sinnvoll	-66	Mozilla/5.0 (iPhone; CPU iPhone OS 14_4_2 like Mac OS X) AppleWebKit/605.1.15 (KHTML, like Gecko) Version/14.0.3 Mobile/15E148 Safari/604.1	-99
325	0	0	32	5822659	-77	-1	-77	-77	-99	-99	d	5	4	21	2	2	1	0	0	0	0	-99	3	4	3	3	3	2	0	2	1	1	7	7	7	5	6	6	7	6	4	4	5	2	2	-99	-99	Mozilla/5.0 (Linux; Android 10; SAMSUNG SM-G970F) AppleWebKit/537.36 (KHTML, like Gecko) SamsungBrowser/13.2 Chrome/83.0.4103.106 Mobile Safari/537.36	-99
326	0	0	31	5822659	-77	702	-77	-77	-99	-99	d	2	8	27	1	2	1	0	0	0	0	-99	6	7	7	7	2	3	4	3	4	1	7	6	7	7	7	6	6	6	3	7	7	3	4	-99	-66	Mozilla/5.0 (iPhone; CPU iPhone OS 14_4_1 like Mac OS X) AppleWebKit/605.1.15 (KHTML, like Gecko) Version/14.0.3 Mobile/15E148 Safari/604.1	-99
328	0	0	32	5822659	-77	-1	-77	-77	-99	-99	d	2	7	31	1	2	1	0	0	0	0	-99	2	4	5	5	3	3	4	3	5	4	4	5	5	2	2	1	2	5	6	1	3	3	2	Kritische Nutzen Risiko Abwägung, nicht nur Pro Impfung. Impfungen haben ihren Stellenwert, aber der Druck, sich gegen Covid impfen zu lassen ist sehr groß.	-99	Mozilla/5.0 (iPhone; CPU iPhone OS 14_4_1 like Mac OS X) AppleWebKit/605.1.15 (KHTML, like Gecko) Version/14.0.3 Mobile/15E148 Safari/604.1	-99
327	0	0	31	5822659	-77	1699	-77	-77	-99	-99	d	2	2	27	2	2	1	0	0	0	0	-99	6	6	6	6	3	1	1	1	1	1	7	6	6	6	6	6	6	6	2	4	4	3	3	-99	-66	Mozilla/5.0 (Macintosh; Intel Mac OS X 10_15_6) AppleWebKit/605.1.15 (KHTML, like Gecko) Version/14.0.3 Safari/605.1.15	-99
329	0	0	31	5822659	-77	724	-77	-77	-99	-99	d	2	10	30	2	2	1	0	0	0	0	-99	6	7	6	6	6	4	4	1	3	2	7	5	7	6	5	6	6	6	6	6	7	3	2	-99	-66	Mozilla/5.0 (iPhone; CPU iPhone OS 14_3 like Mac OS X) AppleWebKit/605.1.15 (KHTML, like Gecko) Version/14.0.2 Mobile/15E148 Safari/604.1	-99
330	0	0	31	5822659	-77	793	-77	-77	-99	-99	d	2	10	32	2	2	1	0	0	0	0	-99	2	5	2	5	3	1	4	1	2	1	4	5	5	7	2	1	7	5	6	2	4	1	1	-99	-66	Mozilla/5.0 (iPhone; CPU OS 14_4_2 like Mac OS X) AppleWebKit/605.1.15 (KHTML, like Gecko) FxiOS/33.0 Mobile/15E148 Safari/605.1.15	-99
331	0	0	31	5822659	-77	1419	-77	-77	-99	-99	d	2	7	28	2	2	1	0	0	0	0	-99	6	7	6	6	2	1	2	2	1	1	7	7	6	6	5	5	7	7	6	6	7	5	5	-99	-66	Mozilla/5.0 (Windows NT 10.0; Win64; x64) AppleWebKit/537.36 (KHTML, like Gecko) Chrome/89.0.4389.90 Safari/537.36 Edg/89.0.774.63	-99
333	0	0	31	5822659	-77	1786	-77	-77	-99	-99	d	2	5	27	1	2	1	0	0	0	0	-99	6	7	6	6	4	4	4	4	4	4	7	7	6	6	6	6	6	7	4	4	7	5	6	-99	-66	Mozilla/5.0 (iPhone; CPU iPhone OS 14_4 like Mac OS X) AppleWebKit/605.1.15 (KHTML, like Gecko) Version/14.0.3 Mobile/15E148 Safari/604.1	-99
335	0	0	31	5822659	-77	886	-77	-77	-99	-99	d	2	8	24	2	2	1	0	0	0	0	-99	7	6	3	5	1	1	4	1	1	3	3	7	7	7	7	7	7	7	7	3	7	7	7	Wahlfächer anbieten,Vorlesungen hochladen dazu	-66	Mozilla/5.0 (iPhone; CPU iPhone OS 14_4 like Mac OS X) AppleWebKit/605.1.15 (KHTML, like Gecko) Version/14.0.3 Mobile/15E148 Safari/604.1	-99
3412	0	0	31	5822659	-77	1546	-77	-77	-99	-99	d	2	10	25	2	1	0	1	0	0	0	-99	6	7	7	7	3	1	6	2	2	1	7	7	7	7	7	7	7	7	7	2	5	6	6	-99	-99	Mozilla/5.0 (iPhone; CPU iPhone OS 14_4_2 like Mac OS X) AppleWebKit/605.1.15 (KHTML, like Gecko) Version/14.0.3 Mobile/15E148 Safari/604.1	-99
336	0	0	31	5822659	-77	752	-77	-77	-99	-99	d	2	2	25	2	2	0	1	0	0	0	-99	7	7	4	2	1	1	1	1	1	1	7	7	6	5	4	4	3	4	4	4	4	4	4	-99	-66	Mozilla/5.0 (Windows NT 10.0; Win64; x64) AppleWebKit/537.36 (KHTML, like Gecko) Chrome/89.0.4389.90 Safari/537.36 Edg/89.0.774.63	-99
338	0	0	31	5822659	-77	1999	-77	-77	-99	-99	d	2	4	31	2	2	1	1	0	0	0	-99	4	5	2	4	1	1	1	1	1	1	7	7	4	5	4	4	6	4	3	4	4	4	4	Bessere impfaufklärung der Medizinstudierenden, Risiken und Nebenwirkungen der Impfung, Studien des Impfstoffes Bessere Erläuterung der Krankheit covid 19 folgen Prävention Diagnostik Spätfolgen etc. Bessere Kommunikation über Nachrichten, sozial Media etc. Wenn Krankenhäuser oder Altenheime Hilfe benötigen	-66	Mozilla/5.0 (iPhone; CPU iPhone OS 14_4 like Mac OS X) AppleWebKit/605.1.15 (KHTML, like Gecko) CriOS/87.0.4280.77 Mobile/15E148 Safari/604.1	-99
340	0	0	31	5822659	-77	1679	-77	-77	-99	-99	d	2	2	19	2	2	1	0	0	0	0	-99	4	5	4	3	5	5	4	6	5	2	5	6	5	4	4	3	5	5	4	2	3	3	2	-99	-66	Mozilla/5.0 (Linux; Android 8.0.0; SAMSUNG SM-G930F) AppleWebKit/537.36 (KHTML, like Gecko) SamsungBrowser/13.2 Chrome/83.0.4103.106 Mobile Safari/537.36	-99
341	0	0	31	5822659	-77	1257	-77	-77	-99	-99	d	2	4	20	2	2	1	0	0	0	0	-99	5	5	5	4	4	2	2	2	2	2	7	6	6	6	6	6	6	6	4	4	6	6	6	-99	-66	Mozilla/5.0 (Macintosh; Intel Mac OS X 10_15_6) AppleWebKit/605.1.15 (KHTML, like Gecko) Version/14.0.3 Safari/605.1.15	-99
349	0	0	31	5822659	-77	1704	-77	-77	-99	-99	d	2	6	27	2	2	1	0	0	0	0	-99	6	6	2	2	5	3	3	2	5	2	7	7	7	6	6	6	6	6	3	5	6	4	4	-99	-66	Mozilla/5.0 (Windows NT 10.0; Win64; x64; rv:87.0) Gecko/20100101 Firefox/87.0	-99
345	0	0	31	5822659	-77	4850	-77	-77	-99	-99	d	2	2	25	2	2	1	0	0	0	0	-99	1	1	1	1	2	1	1	1	1	1	5	5	5	4	4	3	4	4	3	3	3	1	1	-99	-66	Mozilla/5.0 (Macintosh; Intel Mac OS X 10_15_7) AppleWebKit/605.1.15 (KHTML, like Gecko) Version/14.0.3 Safari/605.1.15	-99
342	0	0	31	5822659	-77	2444	-77	-77	-99	-99	d	2	6	29	2	2	1	0	0	0	0	-99	5	5	5	6	1	1	1	1	1	1	7	7	7	7	7	6	7	7	4	6	0	0	0	-99	-66	Mozilla/5.0 (iPhone; CPU iPhone OS 13_6_1 like Mac OS X) AppleWebKit/605.1.15 (KHTML, like Gecko) Version/13.1.2 Mobile/15E148 Safari/604.1	-99
343	0	0	31	5822659	-77	999	-77	-77	-99	-99	d	2	2	37	2	2	1	0	0	0	0	-99	4	2	2	4	1	1	1	1	1	1	7	5	5	4	7	0	7	7	0	7	0	0	0	-99	-66	Mozilla/5.0 (iPhone; CPU iPhone OS 14_4_2 like Mac OS X) AppleWebKit/605.1.15 (KHTML, like Gecko) Version/14.0.3 Mobile/15E148 Safari/604.1	-99
347	0	0	31	5822659	-77	1437	-77	-77	-99	-99	d	2	10	27	1	2	1	0	0	0	0	-99	7	7	7	7	5	1	7	3	2	2	7	7	5	3	5	5	7	4	4	4	4	3	2	Die gängigen Argumente von Impfskeptikern sind bekannt. Es sollte im Studium vermittelt werden, wie man diese evidenzbasiert widerlegen kann.	-66	Mozilla/5.0 (Windows NT 6.1; Win64; x64; rv:85.0) Gecko/20100101 Firefox/85.0	-99
348	0	0	32	5822659	-77	-1	-77	-77	-99	-99	d	2	4	24	2	2	1	0	0	0	0	-99	6	6	4	4	1	1	1	1	1	1	7	7	6	6	1	2	5	7	5	5	7	4	4	-99	-99	Mozilla/5.0 (iPhone; CPU iPhone OS 14_4 like Mac OS X) AppleWebKit/605.1.15 (KHTML, like Gecko) Version/14.0.3 Mobile/15E148 Safari/604.1	-99
350	0	0	31	5822659	-77	746	-77	-77	-99	-99	d	3	12	29	1	2	1	0	0	0	0	-99	5	6	6	6	2	2	6	6	5	5	6	5	6	5	5	6	6	6	3	6	7	3	3	-99	-66	Mozilla/5.0 (Macintosh; Intel Mac OS X 10_15_6) AppleWebKit/605.1.15 (KHTML, like Gecko) Version/14.0.3 Safari/605.1.15	-99
351	0	0	31	5822659	-77	2058	-77	-77	-99	-99	d	2	3	28	1	2	1	0	0	0	0	-99	7	7	7	7	1	1	1	1	1	1	7	4	4	7	4	4	7	7	4	4	7	4	4	-99	-66	Mozilla/5.0 (Linux; Android 7.0; Moto G (4)) AppleWebKit/537.36 (KHTML, like Gecko) Chrome/88.0.4324.181 Mobile Safari/537.36 (Ecosia android@88.0.4324.181)	-99
353	0	0	31	5822659	-77	1451	-77	-77	-99	-99	d	5	4	23	1	3	0	1	0	0	0	-99	4	1	4	7	1	1	1	1	5	4	6	5	5	4	1	4	4	5	1	7	1	2	1	-99	-66	Mozilla/5.0 (Linux; Android 8.1.0; I4312) AppleWebKit/537.36 (KHTML, like Gecko) Chrome/89.0.4389.105 Mobile Safari/537.36	android-app://com.google.android.gm/
387	0	0	31	5822659	-77	1100	-77	-77	-99	-99	d	2	10	23	2	2	1	0	0	0	0	-99	5	5	3	5	1	1	6	7	5	2	7	5	6	6	2	5	6	6	3	6	3	1	1	-99	-66	Mozilla/5.0 (Windows NT 10.0; Win64; x64; rv:87.0) Gecko/20100101 Firefox/87.0	-99
352	0	0	31	5822659	-77	912	-77	-77	-99	-99	d	2	8	23	2	2	1	0	0	0	0	-99	6	6	2	2	2	2	6	6	6	2	7	7	7	7	7	6	6	7	4	5	7	3	3	-99	-66	Mozilla/5.0 (Linux; Android 9; moto g(7) play Build/PPYS29.105-134-12) AppleWebKit/537.36 (KHTML, like Gecko) Chrome/69.0.3497.128 Mobile Safari/537.36 (Ecosia android@69.0.3497.128)	-99
357	0	0	31	5812245	-77	17	-77	-77	-99	-99	d	1	-66	-66	-77	-77	-77	-77	-77	-77	-77	-66	-77	-77	-77	-77	-77	-77	-77	-77	-77	-77	-77	-77	-77	-77	-77	-77	-77	-77	-77	-77	-77	-77	-77	-66	-66	Mozilla/5.0 (Windows NT 10.0; Win64; x64) AppleWebKit/537.36 (KHTML, like Gecko) Chrome/89.0.4389.90 Safari/537.36 Edg/89.0.774.63	-99
359	0	0	31	5822659	-77	1912	-77	-77	-99	-99	d	3	13	36	2	2	1	0	0	0	0	-99	6	7	6	6	1	1	7	6	5	3	7	7	7	6	7	6	6	6	7	7	7	5	6	-99	-66	Mozilla/5.0 (iPhone; CPU iPhone OS 12_4_9 like Mac OS X) AppleWebKit/605.1.15 (KHTML, like Gecko) Version/12.1.2 Mobile/15E148 Safari/604.1	-99
358	0	0	31	5822659	-77	978	-77	-77	-99	-99	d	2	10	22	2	2	0	1	0	0	0	-99	6	5	2	3	2	2	5	2	2	2	7	7	7	7	7	7	7	7	7	7	7	2	2	zu Impfaufklärung habe ich in den letzten 9 Semestern kaum was gehört, zum Impfen allgemein auch kaum was, zum THema Impfskeptiker haben wir gar nicht gelernt	-66	Mozilla/5.0 (Windows NT 10.0; Win64; x64; rv:87.0) Gecko/20100101 Firefox/87.0	-99
360	0	0	31	5822659	-77	796	-77	-77	-99	-99	d	2	3	25	1	2	0	1	0	0	0	-99	6	6	6	3	1	1	5	4	4	1	7	2	5	5	2	3	5	6	6	3	4	2	3	-99	-66	Mozilla/5.0 (Linux; Android 10; SAMSUNG SM-A715F) AppleWebKit/537.36 (KHTML, like Gecko) SamsungBrowser/13.2 Chrome/83.0.4103.106 Mobile Safari/537.36	-99
361	0	0	32	5822659	-77	-1	-77	-77	-99	-99	d	2	10	31	1	2	1	0	0	0	0	-99	6	6	7	7	3	3	4	3	2	1	6	6	5	5	6	6	6	6	3	7	4	3	3	-99	-99	Mozilla/5.0 (iPhone; CPU iPhone OS 14_4_2 like Mac OS X) AppleWebKit/605.1.15 (KHTML, like Gecko) Version/14.0.3 Mobile/15E148 Safari/604.1	-99
362	0	0	31	5822659	-77	1234	-77	-77	-99	-99	d	2	9	36	2	2	1	0	0	0	0	-99	2	2	2	1	2	1	1	1	1	1	6	6	7	7	7	7	6	7	7	5	6	5	5	-99	-66	Mozilla/5.0 (Macintosh; Intel Mac OS X 10_15_6) AppleWebKit/605.1.15 (KHTML, like Gecko) Version/14.0.3 Safari/605.1.15	-99
363	0	0	31	5822659	-77	1099	-77	-77	-99	-99	d	2	4	26	2	2	1	0	0	0	0	-99	7	7	7	7	3	4	5	4	5	1	7	5	7	7	7	7	3	7	7	7	3	2	2	-99	-66	Mozilla/5.0 (iPhone; CPU iPhone OS 14_4_2 like Mac OS X) AppleWebKit/605.1.15 (KHTML, like Gecko) Version/14.0.3 Mobile/15E148 Safari/604.1	-99
364	0	0	31	5822659	-77	2138	-77	-77	-99	-99	d	2	10	28	2	2	1	0	0	0	0	-99	3	5	4	5	4	3	6	5	2	3	7	6	6	7	5	5	6	6	6	6	6	3	3	-99	-66	Mozilla/5.0 (iPhone; CPU iPhone OS 14_4 like Mac OS X) AppleWebKit/605.1.15 (KHTML, like Gecko) Version/14.0.3 Mobile/15E148 Safari/604.1	-99
366	0	0	31	5822659	-77	1838	-77	-77	-99	-99	d	2	5	27	2	2	0	1	0	0	0	-99	6	6	5	5	3	4	1	2	1	3	7	7	6	7	6	6	6	6	7	3	4	5	6	-99	-66	Mozilla/5.0 (iPhone; CPU iPhone OS 14_4_1 like Mac OS X) AppleWebKit/605.1.15 (KHTML, like Gecko) Version/14.0.3 Mobile/15E148 Safari/604.1	-99
368	0	0	31	5822659	-77	1163	-77	-77	-99	-99	d	2	3	24	2	2	1	0	0	0	0	-99	6	6	4	6	1	1	1	1	1	1	6	5	6	4	4	4	5	5	4	4	4	2	2	-99	-66	Mozilla/5.0 (iPhone; CPU iPhone OS 14_4_2 like Mac OS X) AppleWebKit/605.1.15 (KHTML, like Gecko) Version/14.0.3 Mobile/15E148 Safari/604.1	-99
369	0	0	31	5822659	-77	939	-77	-77	-99	-99	d	3	13	25	2	2	1	0	0	0	0	-99	7	7	6	7	0	0	5	5	3	2	7	7	7	7	7	7	7	7	5	6	7	3	2	-99	-66	Mozilla/5.0 (Windows NT 10.0; Win64; x64; rv:87.0) Gecko/20100101 Firefox/87.0	-99
370	0	0	31	5822659	-77	1006	-77	-77	-99	-99	d	2	11	25	2	2	1	0	0	0	0	-99	6	7	5	5	1	1	5	4	2	2	7	6	6	5	6	5	5	6	4	4	4	3	3	-99	-66	Mozilla/5.0 (Macintosh; Intel Mac OS X 10_15_7) AppleWebKit/605.1.15 (KHTML, like Gecko) Version/14.0.2 Safari/605.1.15	-99
372	0	0	31	5822659	-77	2564	-77	-77	-99	-99	d	2	7	25	2	2	1	0	0	0	0	-99	7	7	7	7	4	1	1	1	1	1	7	7	7	7	7	7	7	7	3	7	4	3	5	-99	-66	Mozilla/5.0 (iPhone; CPU iPhone OS 14_4_1 like Mac OS X) AppleWebKit/605.1.15 (KHTML, like Gecko) Version/14.0.3 Mobile/15E148 Safari/604.1	-99
377	0	0	31	5822659	-77	1976	-77	-77	-99	-99	d	3	12	35	1	2	1	0	0	0	0	-99	4	4	2	2	1	1	5	5	6	4	7	7	7	6	7	7	6	7	7	6	5	5	6	-99	-66	Mozilla/5.0 (iPhone; CPU iPhone OS 14_4 like Mac OS X) AppleWebKit/605.1.15 (KHTML, like Gecko) Version/14.0.3 Mobile/15E148 Safari/604.1	-99
373	0	0	31	5822659	-77	760	-77	-77	-99	-99	d	2	5	27	2	2	1	0	0	0	0	-99	5	5	5	6	6	3	3	5	0	2	7	7	7	7	7	7	7	0	7	7	7	7	7	-99	-66	Mozilla/5.0 (Windows NT 10.0; Win64; x64; rv:87.0) Gecko/20100101 Firefox/87.0	-99
389	0	0	31	5822659	-77	1224	-77	-77	-99	-99	d	3	13	25	1	2	1	0	0	0	0	-99	0	0	0	0	1	1	6	6	5	4	7	7	7	7	7	7	7	7	4	4	4	5	5	-99	-66	Mozilla/5.0 (Windows NT 10.0; Win64; x64; rv:87.0) Gecko/20100101 Firefox/87.0	-99
375	0	0	31	5822659	-77	829	-77	-77	-99	-99	d	2	10	32	1	2	1	0	0	0	0	-99	6	6	6	6	1	1	3	3	4	3	7	7	7	7	7	7	6	6	4	5	6	7	7	-99	-66	Mozilla/5.0 (Windows NT 10.0; Win64; x64) AppleWebKit/537.36 (KHTML, like Gecko) Chrome/89.0.4389.90 Safari/537.36 Edg/89.0.774.63	-99
376	0	0	31	5822659	-77	1106	-77	-77	-99	-99	d	2	8	25	2	2	1	0	0	0	0	-99	6	5	3	3	4	4	4	5	4	3	6	6	6	6	6	6	6	6	5	3	4	3	5	-99	-66	Mozilla/5.0 (Linux; Android 9; SAMSUNG SM-G950F) AppleWebKit/537.36 (KHTML, like Gecko) SamsungBrowser/13.2 Chrome/83.0.4103.106 Mobile Safari/537.36	-99
383	0	0	31	5822659	-77	1424	-77	-77	-99	-99	d	2	4	20	1	2	1	0	0	0	0	-99	6	6	5	5	4	4	6	4	2	2	7	7	7	6	6	6	6	6	5	5	5	5	5	-99	-66	Mozilla/5.0 (Windows NT 10.0; Win64; x64) AppleWebKit/537.36 (KHTML, like Gecko) Chrome/89.0.4389.114 Safari/537.36	-99
379	0	0	31	5822659	-77	686	-77	-77	-99	-99	d	2	8	22	1	2	1	0	0	0	0	-99	7	7	3	3	2	1	2	1	1	1	7	7	7	7	3	5	7	7	5	5	7	2	2	-99	-66	Mozilla/5.0 (Windows NT 10.0; Win64; x64) AppleWebKit/537.36 (KHTML, like Gecko) Chrome/88.0.4324.192 Safari/537.36 OPR/74.0.3911.218	-99
388	0	0	31	5822659	-77	1175	-77	-77	-99	-99	d	2	7	25	1	2	1	0	0	0	0	-99	6	7	6	5	2	3	0	0	0	0	7	6	6	5	6	6	6	6	4	5	5	0	0	-99	-66	Mozilla/5.0 (Macintosh; Intel Mac OS X 10_15_6) AppleWebKit/605.1.15 (KHTML, like Gecko) Version/14.0.3 Safari/605.1.15	-99
381	0	0	31	5822659	-77	852	-77	-77	-99	-99	d	2	2	21	1	2	1	1	0	0	0	-99	4	4	7	5	5	1	4	4	4	4	4	4	4	4	3	4	5	5	4	4	7	1	1	Sie sollten nicht so lange Umfragen machen!!	-66	Mozilla/5.0 (Linux; Android 10; POCOPHONE F1) AppleWebKit/537.36 (KHTML, like Gecko) Chrome/83.0.4103.101 Mobile Safari/537.36	-99
385	0	0	31	5822659	-77	1278	-77	-77	-99	-99	d	2	2	20	2	2	0	1	0	0	0	-99	1	7	1	1	1	1	1	1	1	1	5	5	5	4	5	4	4	4	1	7	1	1	1	-99	-66	Mozilla/5.0 (Windows NT 10.0; Win64; x64; rv:87.0) Gecko/20100101 Firefox/87.0	https://webmail.stud.uni-giessen.de/
1249	0	0	32	5822659	-77	-1	-77	-77	-99	-99	d	2	7	28	2	2	1	0	0	0	0	-99	6	7	4	6	2	1	2	2	2	5	7	7	6	7	7	7	7	7	7	2	2	7	7	-99	-99	Mozilla/5.0 (iPhone; CPU iPhone OS 14_4_2 like Mac OS X) AppleWebKit/605.1.15 (KHTML, like Gecko) Version/14.0.3 Mobile/15E148 Safari/604.1	-99
395	0	0	31	5822659	-77	695	-77	-77	-99	-99	d	2	7	24	2	2	1	0	0	0	0	-99	1	3	4	4	2	1	2	1	1	1	2	4	4	2	2	2	3	3	3	2	2	1	1	-99	-66	Mozilla/5.0 (Macintosh; Intel Mac OS X 10_15_6) AppleWebKit/605.1.15 (KHTML, like Gecko) Version/14.0.3 Safari/605.1.15	-99
393	0	0	31	5822659	-77	1455	-77	-77	-99	-99	d	5	5	39	2	2	1	0	0	0	0	-99	5	5	4	5	3	3	3	3	3	3	7	5	5	5	5	5	4	5	5	5	5	5	6	-99	-66	Mozilla/5.0 (Linux; Android 11; SAMSUNG SM-G970F) AppleWebKit/537.36 (KHTML, like Gecko) SamsungBrowser/13.2 Chrome/83.0.4103.106 Mobile Safari/537.36	-99
403	0	0	32	5822659	-77	-1	-77	-77	-99	-99	d	2	10	30	1	2	1	0	0	0	0	-99	2	7	7	7	1	1	6	7	7	5	7	7	5	5	5	5	5	6	4	4	6	3	3	-99	-66	Mozilla/5.0 (Windows NT 10.0; Win64; x64; rv:87.0) Gecko/20100101 Firefox/87.0	-99
392	0	0	31	5822659	-77	882	-77	-77	-99	-99	d	2	7	26	2	2	1	0	0	0	0	-99	6	7	5	4	1	1	1	2	1	1	6	6	5	5	3	4	3	6	4	4	6	4	5	-99	-66	Mozilla/5.0 (Linux; Android 10; SM-G975F) AppleWebKit/537.36 (KHTML, like Gecko) Chrome/89.0.4389.105 Mobile Safari/537.36	-99
396	0	0	31	5822659	-77	1232	-77	-77	-99	-99	d	2	5	39	2	3	1	0	0	0	0	-99	6	7	6	7	2	2	2	1	1	1	7	7	7	7	7	7	7	7	4	7	4	7	7	Studierende der Uni sollten dabei unterstützt werden, selbst Aufklärungskampagnen zu starten z Bsp in einem Wahfach oder in einem Fach wie Psychologie oder Medizinethik.	-66	Mozilla/5.0 (iPhone; CPU iPhone OS 14_1 like Mac OS X) AppleWebKit/605.1.15 (KHTML, like Gecko) Version/14.0 Mobile/15E148 Safari/604.1	-99
399	0	0	31	5822659	-77	1202	-77	-77	-99	-99	d	3	13	26	2	2	1	0	0	0	0	-99	7	7	6	6	3	2	6	4	2	2	7	7	7	7	4	4	7	4	4	4	4	4	4	Das Thema auch in anderen klinischen Fächern thematisieren und nicht nur -wie aktuell meist der Fall- in der Pädiatrie.	-66	Mozilla/5.0 (iPhone; CPU iPhone OS 14_3 like Mac OS X) AppleWebKit/605.1.15 (KHTML, like Gecko) Version/14.0.2 Mobile/15E148 Safari/604.1	-99
397	0	0	32	5822659	-77	-1	-77	-77	-99	-99	d	2	8	27	2	2	1	0	0	0	0	-99	5	6	5	4	1	1	1	1	1	1	7	7	7	7	4	7	7	7	4	5	7	5	5	-99	-99	Mozilla/5.0 (Linux; Android 9; LLD-L31) AppleWebKit/537.36 (KHTML, like Gecko) Chrome/89.0.4389.105 Mobile Safari/537.36	-99
400	0	0	31	5822659	-77	2913	-77	-77	-99	-99	d	2	2	24	2	2	0	1	0	0	0	-99	5	5	4	4	1	1	1	1	1	1	6	5	5	3	3	3	3	5	4	4	4	4	4	-99	-66	Mozilla/5.0 (Windows NT 10.0; Win64; x64) AppleWebKit/537.36 (KHTML, like Gecko) Chrome/89.0.4389.90 Safari/537.36 Edg/89.0.774.63	-99
398	0	0	31	5822659	-77	978	-77	-77	-99	-99	d	2	7	23	2	2	1	0	0	0	0	-99	7	7	7	7	1	1	1	1	1	1	7	7	7	7	7	7	7	7	7	7	7	4	4	-99	-66	Mozilla/5.0 (iPhone; CPU iPhone OS 14_4_2 like Mac OS X) AppleWebKit/605.1.15 (KHTML, like Gecko) Version/14.0.3 Mobile/15E148 Safari/604.1	-99
401	0	0	31	5822659	-77	903	-77	-77	-99	-99	d	2	8	30	1	2	1	0	0	0	0	-99	7	7	7	7	1	1	1	1	1	1	7	7	7	7	7	7	7	7	1	7	7	1	1	-99	-66	Mozilla/5.0 (Linux; Android 9; SM-G950F) AppleWebKit/537.36 (KHTML, like Gecko) Chrome/88.0.4324.181 Mobile Safari/537.36 (Ecosia android@88.0.4324.181)	-99
404	0	0	31	5822659	-77	916	-77	-77	-99	-99	d	2	5	22	1	2	1	0	0	0	0	-99	5	5	3	5	1	1	1	1	1	1	7	7	7	7	7	7	7	7	1	1	7	3	3	-99	-66	Mozilla/5.0 (Linux; Android 10; SM-A505FN) AppleWebKit/537.36 (KHTML, like Gecko) Chrome/89.0.4389.105 Mobile Safari/537.36	-99
402	0	0	31	5822659	-77	696	-77	-77	-99	-99	d	2	2	19	1	2	1	0	0	0	0	-99	7	7	4	5	5	5	5	0	0	0	7	7	7	7	7	7	7	0	7	1	0	1	1	-99	-66	Mozilla/5.0 (iPhone; CPU iPhone OS 14_2_1 like Mac OS X) AppleWebKit/605.1.15 (KHTML, like Gecko) Version/14.0.1 Mobile/15E148 Safari/604.1	-99
406	0	0	31	5822659	-77	1013	-77	-77	-99	-99	d	2	10	33	1	2	1	0	0	0	0	-99	7	7	7	6	5	2	5	3	2	2	7	7	7	7	7	7	7	7	5	5	7	5	3	-99	-66	Mozilla/5.0 (iPhone; CPU iPhone OS 14_4_2 like Mac OS X) AppleWebKit/605.1.15 (KHTML, like Gecko) Version/14.0.3 Mobile/15E148 Safari/604.1	-99
405	0	0	32	5822659	-77	-1	-77	-77	-99	-99	d	2	11	26	1	2	1	0	0	0	0	-99	6	5	5	6	2	2	5	5	2	1	5	5	6	5	6	5	6	5	6	4	4	3	2	-99	-99	Mozilla/5.0 (iPhone; CPU iPhone OS 14_4_2 like Mac OS X) AppleWebKit/605.1.15 (KHTML, like Gecko) Version/14.0.3 Mobile/15E148 Safari/604.1	-99
408	0	0	31	5822659	-77	1252	-77	-77	-99	-99	d	3	12	31	2	2	1	0	0	0	0	-99	5	5	5	5	2	1	6	6	5	5	7	3	3	5	4	2	4	5	5	5	5	1	1	-99	-66	Mozilla/5.0 (iPhone; CPU iPhone OS 14_4_1 like Mac OS X) AppleWebKit/605.1.15 (KHTML, like Gecko) Version/14.0.3 Mobile/15E148 Safari/604.1	-99
409	0	0	31	5822659	-77	1107	-77	-77	-99	-99	d	2	4	21	2	2	1	0	0	0	0	-99	3	2	1	1	2	3	1	1	1	1	6	4	5	1	3	7	5	5	1	7	1	1	1	-99	-66	Mozilla/5.0 (Macintosh; Intel Mac OS X 10_15_6) AppleWebKit/605.1.15 (KHTML, like Gecko) Version/14.0.3 Safari/605.1.15	-99
416	0	0	31	5822659	-77	892	-77	-77	-99	-99	d	2	6	23	1	2	1	0	0	0	0	-99	6	7	5	6	3	1	2	1	1	1	7	7	7	7	3	3	7	6	5	4	7	2	2	-99	-66	Mozilla/5.0 (iPhone; CPU iPhone OS 14_4_2 like Mac OS X) AppleWebKit/605.1.15 (KHTML, like Gecko) Version/14.0.3 Mobile/15E148 Safari/604.1	-99
410	0	0	31	5822659	-77	1290	-77	-77	-99	-99	d	2	8	25	2	2	1	0	0	0	0	-99	5	6	4	6	1	1	6	2	1	1	7	7	7	7	7	7	7	7	7	1	3	3	3	-99	-66	Mozilla/5.0 (Macintosh; Intel Mac OS X 10_13_6) AppleWebKit/605.1.15 (KHTML, like Gecko) Version/13.1.2 Safari/605.1.15	-99
412	0	0	31	5822659	-77	769	-77	-77	-99	-99	d	2	4	19	2	2	1	0	0	0	0	-99	5	7	3	4	1	1	1	1	1	1	7	7	7	7	7	7	7	7	2	6	6	4	4	-99	-66	Mozilla/5.0 (iPhone; CPU iPhone OS 14_4_1 like Mac OS X) AppleWebKit/605.1.15 (KHTML, like Gecko) Version/14.0.3 Mobile/15E148 Safari/604.1	-99
411	0	0	31	5822659	-77	520	-77	-77	-99	-99	d	2	8	22	2	2	0	1	0	0	0	-99	7	7	7	7	1	1	1	1	1	1	5	5	5	5	5	5	5	5	5	5	5	5	5	-99	-66	Mozilla/5.0 (Linux; Android 10; SM-M205FN) AppleWebKit/537.36 (KHTML, like Gecko) Chrome/89.0.4389.105 Mobile Safari/537.36	-99
419	0	0	31	5822659	-77	1072	-77	-77	-99	-99	d	2	10	33	2	2	1	0	0	0	0	-99	5	5	7	7	2	2	4	2	2	1	7	7	7	7	7	7	7	7	7	7	7	7	7	-99	-66	Mozilla/5.0 (Macintosh; Intel Mac OS X 10_15_6) AppleWebKit/605.1.15 (KHTML, like Gecko) Version/14.0.3 Safari/605.1.15	-99
413	0	0	31	5822659	-77	1823	-77	-77	-99	-99	d	2	6	24	2	2	1	0	0	0	0	-99	6	6	5	4	3	2	6	3	1	1	6	6	5	6	5	6	7	6	6	6	6	5	5	-99	-66	Mozilla/5.0 (Linux; Android 11; Mi A3) AppleWebKit/537.36 (KHTML, like Gecko) Chrome/88.0.4324.181 Mobile Safari/537.36 (Ecosia android@88.0.4324.181)	-99
415	0	0	31	5822659	-77	989	-77	-77	-99	-99	d	2	10	24	1	2	1	0	0	0	0	-99	6	6	4	4	1	1	1	1	1	1	7	5	5	5	5	5	5	4	5	5	5	3	3	-99	-66	Mozilla/5.0 (Macintosh; Intel Mac OS X 10_15_6) AppleWebKit/605.1.15 (KHTML, like Gecko) Version/14.0.3 Safari/605.1.15	-99
414	0	0	31	5822659	-77	863	-77	-77	-99	-99	d	5	5	21	2	2	1	0	0	0	0	-99	2	1	1	1	1	1	1	1	1	1	7	7	7	7	7	7	7	7	7	7	7	7	7	-99	-66	Mozilla/5.0 (iPhone; CPU iPhone OS 14_4_1 like Mac OS X) AppleWebKit/605.1.15 (KHTML, like Gecko) Version/14.0.3 Mobile/15E148 Safari/604.1	-99
631	0	0	32	5822659	-77	-1	-77	-77	-99	-99	d	2	6	21	2	2	1	0	0	0	0	-99	3	2	2	3	3	1	1	1	1	1	7	6	6	5	5	5	5	6	5	5	7	4	4	-99	-99	Mozilla/5.0 (Macintosh; Intel Mac OS X 10_15_4) AppleWebKit/537.36 (KHTML, like Gecko) Chrome/87.0.4280.141 Safari/537.36	https://wm.hrz.uni-giessen.de/
418	0	0	31	5822659	-77	1235	-77	-77	-99	-99	d	2	3	28	1	2	0	1	0	0	0	-99	1	1	1	4	1	1	1	1	1	1	7	4	5	4	4	4	4	4	4	4	4	4	4	-99	-66	Mozilla/5.0 (Windows NT 10.0; Win64; x64; rv:87.0) Gecko/20100101 Firefox/87.0	https://wm.hrz.uni-giessen.de/
427	0	0	31	5822659	-77	1650	-77	-77	-99	-99	d	2	9	24	1	2	0	1	0	0	0	-99	6	7	6	6	1	1	5	4	1	1	7	7	7	5	6	6	6	6	4	5	4	2	2	Impfstudien betrachten etc.	-66	Mozilla/5.0 (Windows NT 10.0; Win64; x64) AppleWebKit/537.36 (KHTML, like Gecko) Chrome/89.0.4389.114 Safari/537.36	-99
466	0	0	31	5822659	-77	770	-77	-77	-99	-99	d	2	2	23	1	2	1	0	0	0	0	-99	7	7	6	3	1	1	1	1	1	1	7	7	7	7	3	1	7	7	4	3	4	5	4	-99	-66	Mozilla/5.0 (iPhone; CPU iPhone OS 14_4 like Mac OS X) AppleWebKit/605.1.15 (KHTML, like Gecko) Version/14.0.3 Mobile/15E148 Safari/604.1	-99
421	0	0	31	5822659	-77	1762	-77	-77	-99	-99	d	5	10	28	1	2	1	0	0	0	0	-99	6	6	5	5	1	1	1	1	1	1	6	6	6	6	6	6	6	6	6	6	6	6	6	-99	-66	Mozilla/5.0 (Linux; Android 9; LLD-L31) AppleWebKit/537.36 (KHTML, like Gecko) Chrome/89.0.4389.105 Mobile Safari/537.36	-99
444	0	0	31	5812245	-77	32	-77	-77	-99	-99	d	1	-66	-66	-77	-77	-77	-77	-77	-77	-77	-66	-77	-77	-77	-77	-77	-77	-77	-77	-77	-77	-77	-77	-77	-77	-77	-77	-77	-77	-77	-77	-77	-77	-77	-66	-66	Mozilla/5.0 (iPhone; CPU iPhone OS 14_4_2 like Mac OS X) AppleWebKit/605.1.15 (KHTML, like Gecko) Version/14.0.3 Mobile/15E148 Safari/604.1	-99
424	0	0	31	5822659	-77	1580	-77	-77	-99	-99	d	2	8	34	2	2	1	0	0	0	0	-99	2	2	3	3	2	2	4	3	3	2	7	6	6	5	3	3	7	5	4	4	4	3	3	-99	-66	Mozilla/5.0 (iPhone; CPU iPhone OS 14_4_2 like Mac OS X) AppleWebKit/605.1.15 (KHTML, like Gecko) Version/14.0.3 Mobile/15E148 Safari/604.1	-99
422	0	0	31	5822659	-77	628	-77	-77	-99	-99	d	2	4	33	2	2	1	0	0	0	0	-99	5	6	4	4	1	1	1	2	1	1	7	7	7	7	7	7	7	7	7	7	7	7	7	-99	-66	Mozilla/5.0 (iPhone; CPU iPhone OS 13_5 like Mac OS X) AppleWebKit/605.1.15 (KHTML, like Gecko) Version/13.1.1 Mobile/15E148 Safari/604.1	-99
426	0	0	31	5822659	-77	964	-77	-77	-99	-99	d	2	10	24	2	2	1	0	0	0	0	-99	6	6	3	5	1	1	5	2	2	2	7	6	6	7	4	4	7	6	4	3	4	1	1	-99	-66	Mozilla/5.0 (Macintosh; Intel Mac OS X 10_15_6) AppleWebKit/605.1.15 (KHTML, like Gecko) Version/14.0.3 Safari/605.1.15	-99
428	0	0	31	5812245	-77	6	-77	-77	-99	-99	d	6	-66	-66	-77	-77	-77	-77	-77	-77	-77	-66	-77	-77	-77	-77	-77	-77	-77	-77	-77	-77	-77	-77	-77	-77	-77	-77	-77	-77	-77	-77	-77	-77	-77	-66	-66	Mozilla/5.0 (iPhone; CPU iPhone OS 14_4_1 like Mac OS X) AppleWebKit/605.1.15 (KHTML, like Gecko) Version/14.0.3 Mobile/15E148 Safari/604.1	-99
434	0	0	31	5822659	-77	1645	-77	-77	-99	-99	d	2	8	22	1	2	1	0	0	0	0	-99	5	5	5	3	2	2	2	1	2	1	5	5	5	4	1	5	5	4	5	4	7	1	1	-99	-66	Mozilla/5.0 (iPhone; CPU iPhone OS 14_3 like Mac OS X) AppleWebKit/605.1.15 (KHTML, like Gecko) Version/14.0.2 Mobile/15E148 Safari/604.1	-99
429	0	0	31	5812245	-77	16	-77	-77	-99	-99	d	1	-66	-66	-77	-77	-77	-77	-77	-77	-77	-66	-77	-77	-77	-77	-77	-77	-77	-77	-77	-77	-77	-77	-77	-77	-77	-77	-77	-77	-77	-77	-77	-77	-77	-66	-66	Mozilla/5.0 (Macintosh; Intel Mac OS X 10_15_6) AppleWebKit/605.1.15 (KHTML, like Gecko) Version/14.0.3 Safari/605.1.15	-99
430	0	0	31	5822659	-77	820	-77	-77	-99	-99	d	2	6	20	1	2	1	0	0	0	0	-99	7	7	7	7	1	1	1	1	1	1	7	7	5	7	7	3	7	7	7	7	7	7	7	-99	-66	Mozilla/5.0 (Macintosh; Intel Mac OS X 10_15_6) AppleWebKit/605.1.15 (KHTML, like Gecko) Version/14.0.3 Safari/605.1.15	-99
431	0	0	31	5822659	-77	998	-77	-77	-99	-99	d	2	7	22	1	2	1	0	0	0	0	-99	5	5	5	4	3	1	6	4	4	4	6	5	5	5	4	4	4	5	5	4	4	4	4	-99	-66	Mozilla/5.0 (Windows NT 10.0; Win64; x64) AppleWebKit/537.36 (KHTML, like Gecko) Chrome/89.0.4389.90 Safari/537.36	https://webmail.stud.uni-giessen.de/
432	0	0	31	5822659	-77	899	-77	-77	-99	-99	d	2	10	23	1	2	1	1	0	0	0	-99	3	2	6	5	3	2	6	5	6	6	7	6	5	6	6	4	5	5	4	3	5	3	3	-99	-66	Mozilla/5.0 (Windows NT 10.0; Win64; x64) AppleWebKit/537.36 (KHTML, like Gecko) Chrome/89.0.4389.90 Safari/537.36 Edg/89.0.774.63	-99
435	0	0	31	5822659	-77	690	-77	-77	-99	-99	d	2	2	25	2	2	1	0	0	0	0	-99	7	7	7	7	0	0	0	0	0	0	0	0	0	0	0	0	0	0	0	0	0	0	0	-99	-66	Mozilla/5.0 (iPhone; CPU iPhone OS 14_4 like Mac OS X) AppleWebKit/605.1.15 (KHTML, like Gecko) Version/14.0.3 Mobile/15E148 Safari/604.1	-99
436	0	0	31	5822659	-77	917	-77	-77	-99	-99	d	2	7	23	2	2	1	0	0	0	0	-99	5	4	3	4	5	5	4	3	2	4	6	6	7	7	5	6	5	5	2	6	5	1	1	-99	-66	Mozilla/5.0 (Linux; Android 8.0.0; RNE-L21) AppleWebKit/537.36 (KHTML, like Gecko) Chrome/89.0.4389.105 Mobile Safari/537.36	-99
438	0	0	31	5822659	-77	1399	-77	-77	-99	-99	d	2	3	21	2	2	1	0	0	0	0	-99	3	3	2	6	3	2	2	1	2	2	6	5	6	5	4	4	5	4	3	4	4	2	2	-99	-66	Mozilla/5.0 (iPhone; CPU iPhone OS 14_4_2 like Mac OS X) AppleWebKit/605.1.15 (KHTML, like Gecko) Version/14.0.3 Mobile/15E148 Safari/604.1	-99
440	0	0	32	5822659	-77	-1	-77	-77	-99	-99	d	2	11	24	2	2	1	0	0	0	0	-99	1	3	5	4	1	1	7	2	1	1	7	7	7	2	1	1	3	7	7	7	7	1	1	-99	-99	Mozilla/5.0 (iPhone; CPU iPhone OS 14_4_2 like Mac OS X) AppleWebKit/605.1.15 (KHTML, like Gecko) Version/14.0.3 Mobile/15E148 Safari/604.1	-99
441	0	0	31	5822659	-77	1222	-77	-77	-99	-99	d	2	4	21	1	2	0	1	0	0	0	-99	4	4	1	1	1	1	1	1	1	1	6	6	6	4	4	4	5	5	5	3	4	1	1	-99	-66	Mozilla/5.0 (Linux; Android 10; ELE-L29 Build/HUAWEIELE-L29; wv) AppleWebKit/537.36 (KHTML, like Gecko) Version/4.0 Chrome/83.0.4103.106 Mobile Safari/537.36 EdgW/1.0	-99
446	0	0	31	5822659	-77	798	-77	-77	-99	-99	d	2	10	27	2	2	1	0	0	0	0	-99	5	6	3	2	1	1	6	4	2	1	7	7	7	7	7	7	7	7	7	7	7	6	6	-99	-66	Mozilla/5.0 (Linux; Android 11; SAMSUNG SM-G991B) AppleWebKit/537.36 (KHTML, like Gecko) SamsungBrowser/13.2 Chrome/83.0.4103.106 Mobile Safari/537.36	-99
450	0	0	31	5822659	-77	1435	-77	-77	-99	-99	d	2	10	30	2	2	1	0	0	0	0	-99	4	5	3	3	4	3	4	4	3	3	6	6	5	4	5	5	5	5	4	4	5	3	3	-99	-66	Mozilla/5.0 (Linux; Android 10; SM-G960F) AppleWebKit/537.36 (KHTML, like Gecko) Chrome/89.0.4389.105 Mobile Safari/537.36	android-app://com.google.android.gm/
447	0	0	31	5812245	-77	17	-77	-77	-99	-99	d	1	-66	-66	-77	-77	-77	-77	-77	-77	-77	-66	-77	-77	-77	-77	-77	-77	-77	-77	-77	-77	-77	-77	-77	-77	-77	-77	-77	-77	-77	-77	-77	-77	-77	-66	-66	Mozilla/5.0 (iPhone; CPU iPhone OS 11_4_1 like Mac OS X) AppleWebKit/605.1.15 (KHTML, like Gecko) Version/11.0 Mobile/15E148 Safari/604.1	-99
448	0	0	31	5822659	-77	620	-77	-77	-99	-99	d	2	8	27	2	2	1	0	0	0	0	-99	7	7	7	5	3	1	5	5	5	5	7	7	7	7	1	6	5	5	5	5	5	2	2	-99	-66	Mozilla/5.0 (Macintosh; Intel Mac OS X 10.13; rv:87.0) Gecko/20100101 Firefox/87.0	https://student.uniklinikum-leipzig.de/
451	0	0	31	5822659	-77	1418	-77	-77	-99	-99	d	2	10	37	2	2	1	0	0	0	0	-99	4	5	4	4	1	1	3	1	1	1	5	7	6	5	5	5	5	6	4	4	4	4	4	-99	-66	Mozilla/5.0 (iPhone; CPU iPhone OS 14_4_1 like Mac OS X) AppleWebKit/605.1.15 (KHTML, like Gecko) Version/14.0.3 Mobile/15E148 Safari/604.1	-99
449	0	0	32	5822659	-77	-1	-77	-77	-99	-99	d	2	9	24	2	2	1	0	0	0	0	-99	5	5	5	2	2	2	5	1	1	1	7	7	7	7	2	7	7	7	7	2	4	7	7	-99	-99	Mozilla/5.0 (iPhone; CPU iPhone OS 14_4_1 like Mac OS X) AppleWebKit/605.1.15 (KHTML, like Gecko) Version/14.0.3 Mobile/15E148 Safari/604.1	-99
1491	0	0	31	5822659	-77	1365	-77	-77	-99	-99	d	2	11	31	2	2	1	0	0	0	0	-99	6	6	5	6	4	2	6	5	2	4	7	7	7	7	6	6	6	5	6	6	6	5	4	-99	-99	Mozilla/5.0 (Windows NT 10.0; Win64; x64; rv:87.0) Gecko/20100101 Firefox/87.0	-99
452	0	0	31	5822659	-77	3714	-77	-77	-99	-99	d	2	8	21	2	2	1	0	0	0	0	-99	6	7	4	4	2	1	6	5	2	2	7	6	5	6	4	3	4	7	6	2	5	2	2	Praktische Übungen i.m. Injektion	-99	Mozilla/5.0 (Linux; Android 11; SM-G973F) AppleWebKit/537.36 (KHTML, like Gecko) Chrome/89.0.4389.105 Mobile Safari/537.36	-99
457	0	0	31	5822659	-77	1042	-77	-77	-99	-99	d	2	3	24	1	2	1	0	0	0	0	-99	2	2	2	6	1	1	1	1	1	1	7	7	7	7	7	7	7	7	7	3	6	4	4	-99	-66	Mozilla/5.0 (Windows NT 10.0; Win64; x64) AppleWebKit/537.36 (KHTML, like Gecko) Chrome/89.0.4389.90 Safari/537.36 Edg/89.0.774.63	https://wm.hrz.uni-giessen.de/
453	0	0	31	5822659	-77	723	-77	-77	-99	-99	d	2	9	27	2	2	1	0	0	0	0	-99	7	7	7	7	2	2	3	1	1	2	7	7	7	7	7	7	7	7	5	5	7	7	7	-99	-66	Mozilla/5.0 (iPhone; CPU iPhone OS 14_4_1 like Mac OS X) AppleWebKit/605.1.15 (KHTML, like Gecko) Version/14.0.3 Mobile/15E148 Safari/604.1	-99
455	0	0	31	5822659	-77	730	-77	-77	-99	-99	d	2	4	22	2	2	1	0	0	0	0	-99	2	5	3	3	2	1	1	1	1	1	6	6	5	7	5	5	6	6	2	5	4	2	2	-99	-66	Mozilla/5.0 (Linux; Android 8.0.0; RNE-L21) AppleWebKit/537.36 (KHTML, like Gecko) Chrome/89.0.4389.105 Mobile Safari/537.36	-99
456	0	0	31	5822659	-77	1308	-77	-77	-99	-99	d	2	5	24	1	2	1	0	0	0	0	-99	5	6	5	6	3	1	3	1	1	1	7	7	3	5	2	2	6	7	2	6	3	1	1	-99	-66	Mozilla/5.0 (iPhone; CPU iPhone OS 14_4_2 like Mac OS X) AppleWebKit/605.1.15 (KHTML, like Gecko) Version/14.0.3 Mobile/15E148 Safari/604.1	-99
464	0	0	31	5822659	-77	1615	-77	-77	-99	-99	d	2	10	24	1	2	1	0	0	0	0	-99	5	6	6	6	1	1	3	3	2	1	6	7	7	7	7	7	7	6	4	6	4	5	5	-99	-66	Mozilla/5.0 (Windows NT 10.0; Win64; x64; rv:87.0) Gecko/20100101 Firefox/87.0	https://wm.hrz.uni-giessen.de/
459	0	0	31	5822659	-77	1022	-77	-77	-99	-99	d	2	10	27	1	2	1	0	0	0	0	-99	3	3	6	6	5	6	7	7	3	5	7	5	3	4	3	1	5	5	7	1	7	5	2	-99	-66	Mozilla/5.0 (iPhone; CPU iPhone OS 14_4_2 like Mac OS X) AppleWebKit/605.1.15 (KHTML, like Gecko) Version/14.0.3 Mobile/15E148 Safari/604.1	-99
461	0	0	31	5822659	-77	1244	-77	-77	-99	-99	d	2	1	19	2	2	1	0	0	0	0	-99	2	2	1	1	2	1	1	1	1	1	7	4	4	0	0	0	0	0	0	0	0	0	0	-99	-66	Mozilla/5.0 (Linux; Android 7.0; SM-A310F) AppleWebKit/537.36 (KHTML, like Gecko) Chrome/88.0.4324.181 Mobile Safari/537.36 (Ecosia android@88.0.4324.181)	-99
460	0	0	31	5822659	-77	1137	-77	-77	-99	-99	d	3	13	24	2	2	1	0	0	0	0	-99	6	4	4	5	1	1	7	3	1	2	7	7	7	1	7	7	7	7	4	4	4	1	1	-99	-66	Mozilla/5.0 (Linux; Android 10; Nokia 6.2) AppleWebKit/537.36 (KHTML, like Gecko) Chrome/89.0.4389.105 Mobile Safari/537.36	-99
469	0	0	31	5822659	-77	1027	-77	-77	-99	-99	d	5	14	26	1	2	0	1	0	0	0	-99	5	5	4	4	3	3	5	2	2	2	6	7	7	6	1	7	7	7	7	5	7	4	4	-99	-66	Mozilla/5.0 (iPhone; CPU iPhone OS 14_5 like Mac OS X) AppleWebKit/605.1.15 (KHTML, like Gecko) Version/14.1 Mobile/15E148 Safari/604.1	-99
463	0	0	31	5822659	-77	921	-77	-77	-99	-99	d	2	4	21	2	2	1	0	0	0	0	-99	7	7	7	6	5	6	5	4	3	5	7	4	7	7	7	7	7	7	4	4	4	5	5	-99	-66	Mozilla/5.0 (iPhone; CPU iPhone OS 14_4_1 like Mac OS X) AppleWebKit/605.1.15 (KHTML, like Gecko) Version/14.0.3 Mobile/15E148 Safari/604.1	-99
468	0	0	31	5822659	-77	853	-77	-77	-99	-99	d	2	5	22	2	2	1	0	0	0	0	-99	4	4	6	5	5	3	7	5	5	3	6	5	5	6	5	2	5	5	6	2	2	4	4	-99	-66	Mozilla/5.0 (iPhone; CPU iPhone OS 14_4_2 like Mac OS X) AppleWebKit/605.1.15 (KHTML, like Gecko) Version/14.0.3 Mobile/15E148 Safari/604.1	-99
467	0	0	31	5822659	-77	1388	-77	-77	-99	-99	d	2	7	24	2	2	0	1	0	0	0	-99	1	1	3	5	1	1	5	1	1	1	7	7	5	5	3	4	5	5	7	2	6	3	3	-99	-66	Mozilla/5.0 (iPhone; CPU iPhone OS 14_4_1 like Mac OS X) AppleWebKit/605.1.15 (KHTML, like Gecko) Version/14.0.3 Mobile/15E148 Safari/604.1	-99
470	0	0	31	5822659	-77	1180	-77	-77	-99	-99	d	2	4	25	2	2	1	0	0	0	0	-99	5	5	4	5	4	2	4	2	2	1	7	6	5	5	7	7	6	5	4	4	7	2	2	-99	-66	Mozilla/5.0 (iPhone; CPU iPhone OS 14_2 like Mac OS X) AppleWebKit/605.1.15 (KHTML, like Gecko) Version/14.0.1 Mobile/15E148 Safari/604.1	-99
488	0	0	31	5822659	-77	815	-77	-77	-99	-99	d	2	10	25	2	2	1	0	0	0	0	-99	3	4	5	5	3	3	6	2	2	2	6	6	7	4	7	2	4	6	5	2	4	4	4	-99	-66	Mozilla/5.0 (Windows NT 10.0; Win64; x64; rv:87.0) Gecko/20100101 Firefox/87.0	-99
471	0	0	31	5822659	-77	777	-77	-77	-99	-99	d	2	4	21	2	2	1	0	0	0	0	-99	6	5	4	4	3	3	3	2	2	2	7	7	7	7	4	5	6	5	4	4	4	0	4	-99	-66	Mozilla/5.0 (iPhone; CPU iPhone OS 14_4_2 like Mac OS X) AppleWebKit/605.1.15 (KHTML, like Gecko) Version/14.0.3 Mobile/15E148 Safari/604.1	-99
473	0	0	31	5822659	-77	1183	-77	-77	-99	-99	d	2	8	23	2	2	1	0	0	0	0	-99	6	6	6	5	3	2	5	2	1	1	7	6	6	7	6	5	5	7	6	4	7	4	4	-99	-66	Mozilla/5.0 (iPhone; CPU iPhone OS 14_4_2 like Mac OS X) AppleWebKit/605.1.15 (KHTML, like Gecko) Version/14.0.3 Mobile/15E148 Safari/604.1	-99
479	0	0	32	5822659	-77	-1	-77	-77	-99	-99	d	2	7	30	1	2	0	1	0	0	0	-99	6	6	6	6	2	2	5	5	1	1	7	6	6	7	7	7	6	6	4	5	5	3	3	-99	-99	Mozilla/5.0 (Linux; Android 7.0; SM-G920F) AppleWebKit/537.36 (KHTML, like Gecko) Chrome/87.0.4280.141 Mobile Safari/537.36 OPR/62.3.3146.57763	-99
478	0	0	31	5822659	-77	926	-77	-77	-99	-99	d	2	7	28	1	2	1	0	0	0	0	-99	6	7	5	4	2	1	3	3	1	1	5	6	3	5	2	3	2	5	5	5	5	1	1	-99	-66	Mozilla/5.0 (iPhone; CPU iPhone OS 12_5_1 like Mac OS X) AppleWebKit/605.1.15 (KHTML, like Gecko) Version/12.1.2 Mobile/15E148 Safari/604.1	-99
477	0	0	31	5822659	-77	1417	-77	-77	-99	-99	d	2	8	26	2	2	1	0	0	0	0	-99	3	3	4	4	2	2	2	1	1	1	7	7	7	6	6	6	6	5	4	4	4	1	1	-99	-66	Mozilla/5.0 (iPhone; CPU iPhone OS 14_4_1 like Mac OS X) AppleWebKit/605.1.15 (KHTML, like Gecko) Version/14.0.3 Mobile/15E148 Safari/604.1	-99
475	0	0	31	5822659	-77	978	-77	-77	-99	-99	d	2	5	25	2	2	1	0	0	0	0	-99	7	7	4	5	1	1	1	1	1	1	7	7	7	7	7	7	7	7	7	1	4	2	5	-99	-66	Mozilla/5.0 (iPhone; CPU iPhone OS 14_4 like Mac OS X) AppleWebKit/605.1.15 (KHTML, like Gecko) Version/14.0.3 Mobile/15E148 Safari/604.1	-99
476	0	0	31	5822659	-77	882	-77	-77	-99	-99	d	2	10	24	1	2	1	0	0	0	0	-99	7	7	7	7	1	1	7	7	7	7	7	7	7	7	7	7	7	7	7	7	7	3	3	-99	-66	Mozilla/5.0 (Linux; Android 11; Pixel 5) AppleWebKit/537.36 (KHTML, like Gecko) Chrome/77.0.3865.116 Mobile Safari/537.36 EdgA/46.03.4.5155	-99
484	0	0	32	5822659	-77	-1	-77	-77	-99	-99	d	3	11	24	2	2	1	1	0	0	0	-99	5	3	4	3	3	3	5	4	3	2	6	5	5	6	3	3	5	6	4	2	4	3	2	-99	-99	Mozilla/5.0 (iPhone; CPU iPhone OS 14_4_2 like Mac OS X) AppleWebKit/605.1.15 (KHTML, like Gecko) Version/14.0.3 Mobile/15E148 Safari/604.1	-99
480	0	0	31	5822659	-77	2289	-77	-77	-99	-99	d	2	9	23	1	2	1	0	0	0	0	-99	5	6	7	5	1	1	5	4	5	4	7	5	5	5	5	5	5	5	1	7	1	5	4	-99	-66	Mozilla/5.0 (Linux; Android 10; H8266) AppleWebKit/537.36 (KHTML, like Gecko) Chrome/89.0.4389.105 Mobile Safari/537.36	-99
483	0	0	31	5822659	-77	1660	-77	-77	-99	-99	d	2	6	21	2	2	1	0	0	0	0	-99	5	5	4	4	2	2	5	2	1	1	6	5	5	6	4	3	5	5	5	5	5	4	4	-99	-66	Mozilla/5.0 (Linux; Android 8.0.0; SM-G930F) AppleWebKit/537.36 (KHTML, like Gecko) Chrome/89.0.4389.105 Mobile Safari/537.36	-99
481	0	0	31	5822659	-77	631	-77	-77	-99	-99	d	2	10	21	3	2	1	0	0	0	0	-99	5	5	7	7	0	0	0	0	0	0	0	0	0	0	0	0	0	0	0	0	0	0	0	-99	-66	Mozilla/5.0 (iPhone; CPU iPhone OS 14_4_2 like Mac OS X) AppleWebKit/605.1.15 (KHTML, like Gecko) Version/14.0.3 Mobile/15E148 Safari/604.1	-99
486	0	0	31	5822659	-77	1442	-77	-77	-99	-99	d	2	3	22	1	2	1	0	0	0	0	-99	7	7	7	4	4	3	3	3	2	2	5	5	4	4	6	3	3	3	6	1	5	2	2	-99	-66	Mozilla/5.0 (iPhone; CPU iPhone OS 14_4 like Mac OS X) AppleWebKit/605.1.15 (KHTML, like Gecko) Version/14.0.3 Mobile/15E148 Safari/604.1	-99
482	0	0	31	5822659	-77	820	-77	-77	-99	-99	d	2	7	23	2	2	1	0	0	0	0	-99	4	4	5	4	1	1	1	1	1	1	7	7	7	7	7	7	7	7	7	3	7	4	4	-99	-66	Mozilla/5.0 (iPhone; CPU iPhone OS 14_4_1 like Mac OS X) AppleWebKit/605.1.15 (KHTML, like Gecko) Version/14.0.3 Mobile/15E148 Safari/604.1	-99
485	0	0	31	5822659	-77	1423	-77	-77	-99	-99	d	2	10	22	2	2	1	0	0	0	0	-99	7	7	7	7	2	1	5	5	1	5	6	6	6	6	4	6	7	6	4	6	4	5	5	-99	-66	Mozilla/5.0 (Linux; Android 9; SM-G955F Build/PPR1.180610.011; wv) AppleWebKit/537.36 (KHTML, like Gecko) Version/4.0 Chrome/89.0.4389.105 Mobile Safari/537.36 EdgW/1.0	-99
487	0	0	31	5822659	-77	791	-77	-77	-99	-99	d	2	8	31	2	1	1	1	0	0	0	-99	7	7	5	5	3	1	7	3	2	2	7	7	7	6	7	7	7	7	7	7	7	7	7	-99	-66	Mozilla/5.0 (iPhone; CPU iPhone OS 14_4_1 like Mac OS X) AppleWebKit/605.1.15 (KHTML, like Gecko) Version/14.0.3 Mobile/15E148 Safari/604.1	-99
492	0	0	31	5822659	-77	583	-77	-77	-99	-99	d	3	13	24	2	2	1	1	0	0	0	-99	6	6	5	5	1	1	4	2	1	1	7	7	6	7	4	4	5	7	5	4	7	3	3	-99	-66	Mozilla/5.0 (Linux; Android 11; SAMSUNG SM-G973F) AppleWebKit/537.36 (KHTML, like Gecko) SamsungBrowser/13.2 Chrome/83.0.4103.106 Mobile Safari/537.36	-99
493	0	0	32	5822659	-77	-1	-77	-77	-99	-99	d	2	10	24	1	2	0	1	0	0	0	-99	5	5	5	5	0	0	0	0	0	0	0	0	0	0	0	0	0	0	0	0	0	0	0	-99	-99	Mozilla/5.0 (Macintosh; Intel Mac OS X 10_15_6) AppleWebKit/605.1.15 (KHTML, like Gecko) Version/14.0.3 Safari/605.1.15	-99
495	0	0	31	5822659	-77	809	-77	-77	-99	-99	d	3	12	28	2	2	0	1	0	0	0	-99	3	5	4	5	3	2	7	3	2	3	7	7	7	2	2	2	7	5	4	6	7	3	3	-99	-66	Mozilla/5.0 (Linux; Android 11; SAMSUNG SM-A405FN) AppleWebKit/537.36 (KHTML, like Gecko) SamsungBrowser/13.2 Chrome/83.0.4103.106 Mobile Safari/537.36	-99
498	0	0	31	5822659	-77	992	-77	-77	-99	-99	d	2	3	26	2	2	1	0	0	0	0	-99	6	7	7	7	1	1	1	1	2	1	7	7	7	4	4	2	5	7	3	3	7	4	6	-99	-66	Mozilla/5.0 (iPhone; CPU iPhone OS 14_4_2 like Mac OS X) AppleWebKit/605.1.15 (KHTML, like Gecko) Version/14.0.3 Mobile/15E148 Safari/604.1	-99
497	0	0	31	5812245	-77	15	-77	-77	-99	-99	d	1	-66	-66	-77	-77	-77	-77	-77	-77	-77	-66	-77	-77	-77	-77	-77	-77	-77	-77	-77	-77	-77	-77	-77	-77	-77	-77	-77	-77	-77	-77	-77	-77	-77	-66	-66	Mozilla/5.0 (Windows NT 10.0; Win64; x64) AppleWebKit/537.36 (KHTML, like Gecko) Chrome/89.0.4389.90 Safari/537.36	-99
499	0	0	31	5822659	-77	685	-77	-77	-99	-99	d	2	4	22	1	2	1	0	0	0	0	-99	2	2	3	3	5	2	3	2	2	3	5	5	5	5	3	4	4	4	3	4	5	3	3	-99	-66	Mozilla/5.0 (Macintosh; Intel Mac OS X 10_15_6) AppleWebKit/605.1.15 (KHTML, like Gecko) Version/14.0.2 Safari/605.1.15	-99
500	0	0	31	5822659	-77	2427	-77	-77	-99	-99	d	2	5	29	2	2	1	0	0	0	0	-99	6	7	6	7	5	5	1	1	1	1	7	4	4	4	0	0	0	0	0	0	0	0	0	Ich kann den Aussagen zum Themenbereich Lehre und Impfen nicht zustimmen, weil ich erst ins klinische Semester starte und nicht weiß, wie stark die Gewichtung bislang ausfällt.	-66	Mozilla/5.0 (Windows NT 10.0; Win64; x64; rv:87.0) Gecko/20100101 Firefox/87.0	https://deref-web.de/
501	0	0	31	5822659	-77	1139	-77	-77	-99	-99	d	2	5	22	2	2	1	0	0	0	0	-99	5	7	6	7	1	1	1	3	1	1	7	7	7	7	7	7	7	7	7	7	7	7	7	Ich fände es wahnsinnig wichtig eine bundesweite einheitliche und breit Öffentliche Impfkampagne zu starten mit möglichst viel Medienbeteiligung. Leider habe ich das Gefühl, dass sich Patienten von all den gegensätzlichen Nachrichten zu Impfungen in den Medien für die am spekatulärst negativsten entscheiden. Meiner Meinung nach bleibt die Bundesregierung ihrer Verpflichtung schuldig, die Bürger v…	-66	Mozilla/5.0 (Windows NT 10.0; Win64; x64; rv:87.0) Gecko/20100101 Firefox/87.0	https://webmail.stud.uni-giessen.de/
503	0	0	31	5822659	-77	797	-77	-77	-99	-99	d	2	6	21	1	2	1	0	0	0	0	-99	5	5	4	4	0	0	0	0	0	0	0	0	0	0	0	0	0	0	0	0	0	0	0	-99	-66	Mozilla/5.0 (Linux; Android 10; ONEPLUS A6003) AppleWebKit/537.36 (KHTML, like Gecko) Chrome/89.0.4389.105 Mobile Safari/537.36	android-app://com.google.android.gm/
504	0	0	31	5822659	-77	840	-77	-77	-99	-99	d	2	4	23	2	2	0	1	0	0	0	-99	5	5	4	4	2	1	2	3	2	1	6	6	6	6	6	6	6	6	6	2	4	3	2	-99	-66	Mozilla/5.0 (iPhone; CPU iPhone OS 14_4_1 like Mac OS X) AppleWebKit/605.1.15 (KHTML, like Gecko) Version/14.0.3 Mobile/15E148 Safari/604.1	-99
509	0	0	31	5822659	-77	1200	-77	-77	-99	-99	d	2	2	22	2	2	1	0	0	0	0	-99	4	1	1	1	0	0	0	0	0	0	0	0	0	0	0	0	0	0	0	0	0	0	0	-99	-66	Mozilla/5.0 (Linux; Android 10; SM-J600G) AppleWebKit/537.36 (KHTML, like Gecko) Chrome/88.0.4324.181 Mobile Safari/537.36 (Ecosia android@88.0.4324.181)	-99
505	0	0	31	5822659	-77	927	-77	-77	-99	-99	d	2	11	25	1	2	1	0	0	0	0	-99	6	6	6	6	0	0	6	6	2	2	7	5	6	6	5	2	6	5	4	4	5	4	4	-99	-66	Mozilla/5.0 (Windows NT 10.0; Win64; x64) AppleWebKit/537.36 (KHTML, like Gecko) Chrome/89.0.4389.90 Safari/537.36	-99
507	0	0	31	5822659	-77	754	-77	-77	-99	-99	d	2	1	20	2	2	1	0	0	0	0	-99	6	6	5	5	2	2	2	2	2	2	7	7	5	7	5	5	5	6	7	4	7	3	3	-99	-66	Mozilla/5.0 (iPhone; CPU iPhone OS 14_4_1 like Mac OS X) AppleWebKit/605.1.15 (KHTML, like Gecko) Version/14.0.3 Mobile/15E148 Safari/604.1	-99
508	0	0	31	5822659	-77	2130	-77	-77	-99	-99	d	2	5	22	1	2	0	1	0	0	0	-99	5	5	6	5	4	4	4	4	4	4	4	4	4	4	4	4	4	4	4	4	4	4	5	-99	-66	Mozilla/5.0 (Linux; Android 11; SM-G980F) AppleWebKit/537.36 (KHTML, like Gecko) Chrome/89.0.4389.105 Mobile Safari/537.36	-99
513	0	0	31	5822659	-77	1188	-77	-77	-99	-99	d	2	9	31	1	2	1	0	0	0	0	-99	7	7	7	7	2	2	2	2	2	2	7	7	7	7	7	7	7	7	7	7	7	6	6	-99	-66	Mozilla/5.0 (Linux; Android 10; H8324) AppleWebKit/537.36 (KHTML, like Gecko) Chrome/89.0.4389.105 Mobile Safari/537.36	-99
510	0	0	31	5822659	-77	1415	-77	-77	-99	-99	d	2	5	24	2	2	1	1	0	0	0	-99	7	7	6	6	4	4	4	1	1	1	7	4	4	4	4	4	4	4	4	4	4	4	4	-99	-66	Mozilla/5.0 (iPhone; CPU iPhone OS 14_4_2 like Mac OS X) AppleWebKit/605.1.15 (KHTML, like Gecko) Version/14.0.3 Mobile/15E148 Safari/604.1	-99
512	0	0	31	5822659	-77	748	-77	-77	-99	-99	d	2	3	21	2	2	1	0	0	0	0	-99	7	7	6	5	5	5	5	2	4	2	7	7	7	6	7	5	7	6	4	4	7	5	5	-99	-66	Mozilla/5.0 (iPhone; CPU iPhone OS 14_4_1 like Mac OS X) AppleWebKit/605.1.15 (KHTML, like Gecko) Version/14.0.3 Mobile/15E148 Safari/604.1	-99
514	0	0	31	5822659	-77	601	-77	-77	-99	-99	d	2	8	27	2	2	1	0	0	0	0	-99	4	1	1	1	1	1	6	4	4	4	7	7	7	7	7	7	7	7	7	7	7	3	3	-99	-66	Mozilla/5.0 (Macintosh; Intel Mac OS X 10_15_6) AppleWebKit/605.1.15 (KHTML, like Gecko) Version/14.0.3 Safari/605.1.15	https://wm.hrz.uni-giessen.de/horde/imp/dynamic.php?page=mailbox
515	0	0	31	5822659	-77	1285	-77	-77	-99	-99	d	3	15	32	2	2	1	0	0	0	0	-99	4	4	4	4	2	2	5	4	2	2	7	5	6	7	7	6	7	6	6	3	7	4	4	-99	-66	Mozilla/5.0 (iPhone; CPU iPhone OS 14_4 like Mac OS X) AppleWebKit/605.1.15 (KHTML, like Gecko) Version/14.0.3 Mobile/15E148 Safari/604.1	-99
518	0	0	31	5822659	-77	1586	-77	-77	-99	-99	d	2	7	31	1	2	1	0	0	0	0	-99	5	6	6	6	2	2	6	6	6	6	7	7	6	5	6	4	6	6	5	5	5	4	4	-99	-66	Mozilla/5.0 (Linux; Android 11; SAMSUNG SM-M515F) AppleWebKit/537.36 (KHTML, like Gecko) SamsungBrowser/13.2 Chrome/83.0.4103.106 Mobile Safari/537.36	-99
519	0	0	31	5822659	-77	1104	-77	-77	-99	-99	d	2	2	24	2	2	0	1	0	0	0	-99	1	1	3	3	2	2	6	5	2	2	7	5	5	5	4	4	5	5	4	4	5	4	4	-99	-66	Mozilla/5.0 (Macintosh; Intel Mac OS X 10_15_6) AppleWebKit/605.1.15 (KHTML, like Gecko) Version/14.0.1 Safari/605.1.15	-99
523	0	0	31	5822659	-77	755	-77	-77	-99	-99	d	2	4	23	2	2	1	1	0	0	0	-99	7	7	5	5	4	4	2	2	2	2	7	7	7	7	7	5	7	7	2	6	2	3	3	-99	-66	Mozilla/5.0 (iPhone; CPU iPhone OS 14_4 like Mac OS X) AppleWebKit/605.1.15 (KHTML, like Gecko) Version/14.0.3 Mobile/15E148 Safari/604.1	https://wm.hrz.uni-giessen.de/horde/imp/smartmobile.php
522	0	0	31	5822659	-77	966	-77	-77	-99	-99	d	2	10	25	2	2	1	1	0	0	0	-99	6	6	2	2	2	2	5	5	5	4	7	7	5	5	4	4	4	6	5	5	6	5	5	-99	-66	Mozilla/5.0 (Linux; Android 10; SAMSUNG SM-G965F) AppleWebKit/537.36 (KHTML, like Gecko) SamsungBrowser/13.2 Chrome/83.0.4103.106 Mobile Safari/537.36	-99
525	0	0	31	5822659	-77	1032	-77	-77	-99	-99	d	2	7	22	2	2	1	0	0	0	0	-99	7	7	6	6	2	2	4	4	3	1	5	5	6	6	6	5	7	6	4	4	4	5	5	-99	-66	Mozilla/5.0 (Windows NT 10.0; Win64; x64) AppleWebKit/537.36 (KHTML, like Gecko) Chrome/89.0.4389.114 Safari/537.36	https://webmail.stud.uni-giessen.de/
534	0	0	31	5822659	-77	972	-77	-77	-99	-99	d	2	9	24	2	2	1	0	0	0	0	-99	6	6	6	6	1	1	4	2	2	2	6	6	6	6	5	5	7	6	2	6	6	6	6	-99	-66	Mozilla/5.0 (Windows NT 10.0; Win64; x64) AppleWebKit/537.36 (KHTML, like Gecko) Chrome/89.0.4389.90 Safari/537.36 Edg/89.0.774.63	https://wm.hrz.uni-giessen.de/
694	0	0	31	5822659	-77	951	-77	-77	-99	-99	d	2	6	25	1	2	1	0	0	0	0	-99	6	6	6	6	0	0	0	0	0	0	0	0	0	0	0	0	0	0	0	0	0	0	0	-99	-99	Mozilla/5.0 (Windows NT 10.0; Win64; x64; rv:87.0) Gecko/20100101 Firefox/87.0	https://webmail.stud.uni-giessen.de/
526	0	0	31	5812245	-77	6354	-77	-77	-99	-99	d	1	-66	-66	-77	-77	-77	-77	-77	-77	-77	-66	-77	-77	-77	-77	-77	-77	-77	-77	-77	-77	-77	-77	-77	-77	-77	-77	-77	-77	-77	-77	-77	-77	-77	-66	-66	Mozilla/5.0 (iPhone; CPU iPhone OS 14_4_2 like Mac OS X) AppleWebKit/605.1.15 (KHTML, like Gecko) Version/14.0.3 Mobile/15E148 Safari/604.1	-99
527	0	0	31	5822659	-77	946	-77	-77	-99	-99	d	2	10	26	2	2	1	0	0	0	0	-99	5	5	4	5	3	3	5	3	2	2	6	5	4	6	3	2	4	4	4	4	4	2	2	-99	-66	Mozilla/5.0 (iPhone; CPU iPhone OS 14_4 like Mac OS X) AppleWebKit/605.1.15 (KHTML, like Gecko) Version/14.0.3 Mobile/15E148 Safari/604.1	-99
528	0	0	31	5822659	-77	1846	-77	-77	-99	-99	d	2	10	30	2	2	1	0	0	0	0	-99	4	5	4	4	1	1	1	1	1	2	7	6	6	5	5	7	7	5	4	5	4	1	1	-99	-66	Mozilla/5.0 (iPhone; CPU iPhone OS 14_4_1 like Mac OS X) AppleWebKit/605.1.15 (KHTML, like Gecko) Version/14.0.3 Mobile/15E148 Safari/604.1	-99
529	0	0	31	5822659	-77	2088	-77	-77	-99	-99	d	2	5	22	2	2	0	1	0	0	0	-99	7	7	7	7	3	1	1	1	1	1	7	7	7	7	7	7	7	7	7	7	7	3	5	-99	-66	Mozilla/5.0 (Macintosh; Intel Mac OS X 10_15_6) AppleWebKit/605.1.15 (KHTML, like Gecko) Version/14.0.3 Safari/605.1.15	https://wm.hrz.uni-giessen.de/horde/imp/dynamic.php?page=mailbox
530	0	0	31	5822659	-77	1879	-77	-77	-99	-99	d	2	3	26	2	2	1	0	0	0	0	-99	5	6	3	3	1	1	1	1	1	1	7	5	4	5	2	2	6	6	7	2	7	4	3	-99	-66	Mozilla/5.0 (iPhone; CPU iPhone OS 14_4_2 like Mac OS X) AppleWebKit/605.1.15 (KHTML, like Gecko) Version/14.0.3 Mobile/15E148 Safari/604.1	-99
532	0	0	32	5822659	-77	-1	-77	-77	-99	-99	d	2	4	20	2	2	1	0	0	0	0	-99	3	5	3	3	2	2	2	2	5	3	7	7	5	5	5	5	5	6	6	5	5	3	3	-99	-99	Mozilla/5.0 (iPhone; CPU iPhone OS 14_4_2 like Mac OS X) AppleWebKit/605.1.15 (KHTML, like Gecko) Version/14.0.3 Mobile/15E148 Safari/604.1	-99
535	0	0	31	5822659	-77	958	-77	-77	-99	-99	d	2	10	26	1	2	1	0	0	0	0	-99	6	6	6	6	1	1	5	4	1	1	4	4	4	4	4	4	4	4	4	4	4	4	4	-99	-66	Mozilla/5.0 (Macintosh; Intel Mac OS X 10_15_6) AppleWebKit/605.1.15 (KHTML, like Gecko) Version/14.0.3 Safari/605.1.15	-99
536	0	0	31	5822659	-77	1000	-77	-77	-99	-99	d	2	9	22	2	2	1	0	0	0	0	-99	6	7	7	7	2	2	7	7	5	4	7	5	5	6	3	2	3	2	5	5	5	1	1	-99	-66	Mozilla/5.0 (iPhone; CPU iPhone OS 13_6_1 like Mac OS X) AppleWebKit/605.1.15 (KHTML, like Gecko) Version/13.1.2 Mobile/15E148 Safari/604.1	-99
538	0	0	31	5822659	-77	1303	-77	-77	-99	-99	d	2	2	27	2	2	1	0	0	0	0	-99	4	4	4	5	1	1	1	1	1	1	7	5	5	7	7	7	5	7	4	6	7	4	4	-99	-66	Mozilla/5.0 (iPhone; CPU iPhone OS 14_4_1 like Mac OS X) AppleWebKit/605.1.15 (KHTML, like Gecko) Version/14.0.3 Mobile/15E148 Safari/604.1	-99
537	0	0	31	5822659	-77	1126	-77	-77	-99	-99	d	2	10	26	2	2	0	1	0	0	0	-99	3	5	3	3	2	2	6	6	6	4	7	7	7	5	2	2	3	2	2	2	4	1	1	-99	-66	Mozilla/5.0 (iPhone; CPU iPhone OS 14_4_2 like Mac OS X) AppleWebKit/605.1.15 (KHTML, like Gecko) Version/14.0.3 Mobile/15E148 Safari/604.1	-99
539	0	0	31	5822659	-77	1244	-77	-77	-99	-99	d	3	13	30	1	2	1	0	0	0	0	-99	7	7	7	6	3	2	3	2	3	2	7	7	7	7	5	5	5	6	6	6	6	2	2	-99	-66	Mozilla/5.0 (iPhone; CPU iPhone OS 14_4_2 like Mac OS X) AppleWebKit/605.1.15 (KHTML, like Gecko) Version/14.0.3 Mobile/15E148 Safari/604.1	-99
540	0	0	31	5822659	-77	1235	-77	-77	-99	-99	d	2	10	23	2	2	1	0	0	0	0	-99	6	6	5	5	3	1	5	3	1	1	6	4	7	5	6	7	7	7	7	5	5	5	5	-99	-66	Mozilla/5.0 (Macintosh; Intel Mac OS X 10_15_7) AppleWebKit/605.1.15 (KHTML, like Gecko) Version/14.0 Safari/605.1.15	-99
543	0	0	31	5822659	-77	1126	-77	-77	-99	-99	d	2	4	20	2	2	1	0	0	0	0	-99	5	5	5	5	6	6	4	4	4	4	7	6	5	6	4	4	5	4	2	6	4	4	4	-99	-66	Mozilla/5.0 (Linux; Android 7.0; SM-A510F Build/NRD90M; wv) AppleWebKit/537.36 (KHTML, like Gecko) Version/4.0 Chrome/89.0.4389.105 Mobile Safari/537.36 StudoBrowser/4.02.4-android-studo (https://studo.com/studo-browser-information-and-contact)	-99
545	0	0	31	5822659	-77	917	-77	-77	-99	-99	d	2	7	30	1	2	1	0	0	0	0	-99	5	6	5	5	3	3	3	3	3	3	5	0	0	0	0	0	0	0	0	0	0	0	0	-99	-66	Mozilla/5.0 (Windows NT 10.0; Win64; x64) AppleWebKit/537.36 (KHTML, like Gecko) Chrome/88.0.4324.192 Safari/537.36 OPR/74.0.3911.218	https://webmail.stud.uni-giessen.de/horde/imp/dynamic.php?page=mailbox
544	0	0	31	5822659	-77	2761	-77	-77	-99	-99	d	2	2	30	2	2	1	0	0	0	0	-99	2	2	4	4	0	0	0	0	0	0	0	0	0	0	0	0	0	0	0	0	0	0	0	-99	-99	Mozilla/5.0 (Linux; Android 10; BLA-L29) AppleWebKit/537.36 (KHTML, like Gecko) Chrome/89.0.4389.105 Mobile Safari/537.36	-99
542	0	0	31	5822659	-77	868	-77	-77	-99	-99	d	2	5	24	2	2	1	0	0	0	0	-99	7	7	6	7	1	1	2	1	1	1	7	7	7	7	7	7	7	7	7	2	6	3	3	-99	-66	Mozilla/5.0 (iPhone; CPU iPhone OS 14_4_2 like Mac OS X) AppleWebKit/605.1.15 (KHTML, like Gecko) Version/14.0.3 Mobile/15E148 Safari/604.1	-99
546	0	0	32	5822659	-77	-1	-77	-77	-99	-99	d	2	8	30	1	2	1	0	0	0	0	-99	5	6	5	5	3	3	5	3	2	2	5	4	5	5	4	4	5	5	1	6	2	2	2	-99	-99	Mozilla/5.0 (Linux; Android 9; ANE-LX1) AppleWebKit/537.36 (KHTML, like Gecko) Chrome/89.0.4389.105 Mobile Safari/537.36	-99
549	0	0	31	5822659	-77	896	-77	-77	-99	-99	d	2	4	27	1	2	1	0	0	0	0	-99	4	5	4	4	3	3	3	3	3	3	7	7	7	7	7	7	7	7	7	1	1	4	7	-99	-66	Mozilla/5.0 (iPhone; CPU iPhone OS 14_4_1 like Mac OS X) AppleWebKit/605.1.15 (KHTML, like Gecko) Version/14.0.3 Mobile/15E148 Safari/604.1	-99
547	0	0	31	5822659	-77	842	-77	-77	-99	-99	d	2	6	20	2	2	1	0	0	0	0	-99	6	5	4	2	3	4	3	3	3	3	5	4	0	0	0	0	0	0	0	0	0	0	0	-99	-66	Mozilla/5.0 (iPhone; CPU iPhone OS 14_4_2 like Mac OS X) AppleWebKit/605.1.15 (KHTML, like Gecko) Version/14.0.3 Mobile/15E148 Safari/604.1	-99
548	0	0	31	5822659	-77	808	-77	-77	-99	-99	d	2	6	26	1	3	0	1	0	0	0	-99	4	5	6	6	4	4	7	4	4	4	7	7	7	7	7	4	6	7	7	5	6	4	4	-99	-66	Mozilla/5.0 (Android 11; Mobile; rv:87.0) Gecko/87.0 Firefox/87.0	https://wm.hrz.uni-giessen.de/
550	0	0	31	5812245	-77	12	-77	-77	-99	-99	d	1	-66	-66	-77	-77	-77	-77	-77	-77	-77	-66	-77	-77	-77	-77	-77	-77	-77	-77	-77	-77	-77	-77	-77	-77	-77	-77	-77	-77	-77	-77	-77	-77	-77	-66	-66	Mozilla/5.0 (Windows NT 10.0; Win64; x64; rv:87.0) Gecko/20100101 Firefox/87.0	-99
551	0	0	31	5812245	-77	17	-77	-77	-99	-99	d	1	-66	-66	-77	-77	-77	-77	-77	-77	-77	-66	-77	-77	-77	-77	-77	-77	-77	-77	-77	-77	-77	-77	-77	-77	-77	-77	-77	-77	-77	-77	-77	-77	-77	-66	-66	Mozilla/5.0 (Windows NT 10.0; Win64; x64) AppleWebKit/537.36 (KHTML, like Gecko) Chrome/89.0.4389.90 Safari/537.36 Edg/89.0.774.63	https://wm.hrz.uni-giessen.de/
552	0	0	31	5822659	-77	1082	-77	-77	-99	-99	d	2	6	29	2	1	1	0	0	0	0	-99	5	5	5	2	2	1	1	1	1	1	6	6	7	3	6	5	6	6	3	6	6	5	5	-99	-66	Mozilla/5.0 (iPhone; CPU iPhone OS 14_4_1 like Mac OS X) AppleWebKit/605.1.15 (KHTML, like Gecko) Version/14.0.3 Mobile/15E148 Safari/604.1	-99
553	0	0	32	5822659	-77	-1	-77	-77	-99	-99	d	2	9	32	1	1	1	0	0	0	0	-99	6	6	6	6	1	1	1	1	1	1	6	6	6	6	1	6	6	6	6	6	6	6	6	-99	-99	Mozilla/5.0 (Macintosh; Intel Mac OS X 11_2_3) AppleWebKit/537.36 (KHTML, like Gecko) Chrome/89.0.4389.90 Safari/537.36	https://webmail.stud.uni-giessen.de/
554	0	0	31	5822659	-77	1008	-77	-77	-99	-99	d	2	3	26	2	2	0	1	0	0	0	-99	6	6	5	5	1	1	1	1	1	1	7	6	6	6	3	3	6	4	4	4	4	4	4	-99	-66	Mozilla/5.0 (Macintosh; Intel Mac OS X 10_15_7) AppleWebKit/605.1.15 (KHTML, like Gecko) Version/14.0 Safari/605.1.15	https://wm.hrz.uni-giessen.de/horde/imp/dynamic.php?page=mailbox
558	0	0	31	5822659	-77	2188	-77	-77	-99	-99	d	2	8	24	1	2	1	0	0	0	0	-99	7	7	7	7	3	2	6	2	2	1	7	7	7	7	5	6	7	4	2	7	3	2	2	-99	-66	Mozilla/5.0 (iPhone; CPU iPhone OS 14_4_1 like Mac OS X) AppleWebKit/605.1.15 (KHTML, like Gecko) Version/14.0.3 Mobile/15E148 Safari/604.1	-99
556	0	0	31	5822659	-77	736	-77	-77	-99	-99	d	2	7	27	2	2	1	0	0	0	0	-99	7	7	5	6	1	2	1	1	1	1	7	7	7	7	7	7	7	7	4	4	4	7	3	-99	-66	Mozilla/5.0 (Linux; Android 11; SAMSUNG SM-G973F/G973FXXU9FUBD) AppleWebKit/537.36 (KHTML, like Gecko) SamsungBrowser/13.2 Chrome/83.0.4103.106 Mobile Safari/537.36	-99
557	0	0	31	5822659	-77	693	-77	-77	-99	-99	d	2	4	20	2	2	0	1	0	0	0	-99	5	5	5	4	0	0	0	0	0	0	0	0	0	0	0	0	0	0	0	0	0	0	0	-99	-66	Mozilla/5.0 (iPhone; CPU iPhone OS 14_4_1 like Mac OS X) AppleWebKit/605.1.15 (KHTML, like Gecko) Version/14.0.3 Mobile/15E148 Safari/604.1	-99
559	0	0	31	5822659	-77	806	-77	-77	-99	-99	d	2	6	22	2	2	1	0	0	0	0	-99	7	7	7	7	5	5	3	3	4	5	7	5	6	4	3	5	6	5	5	3	6	5	4	-99	-66	Mozilla/5.0 (iPhone; CPU iPhone OS 14_4 like Mac OS X) AppleWebKit/605.1.15 (KHTML, like Gecko) Version/14.0.3 Mobile/15E148 Safari/604.1	-99
560	0	0	31	5812245	-77	8	-77	-77	-99	-99	d	1	-66	-66	-77	-77	-77	-77	-77	-77	-77	-66	-77	-77	-77	-77	-77	-77	-77	-77	-77	-77	-77	-77	-77	-77	-77	-77	-77	-77	-77	-77	-77	-77	-77	-66	-66	Mozilla/5.0 (Linux; Android 11; POCO F2 Pro) AppleWebKit/537.36 (KHTML, like Gecko) Chrome/89.0.4389.105 Mobile Safari/537.36	-99
561	0	0	32	5822659	-77	-1	-77	-77	-99	-99	d	2	10	23	2	2	0	1	0	0	0	-99	7	7	4	4	1	1	7	5	7	6	7	5	5	6	2	2	5	7	4	6	7	1	1	-99	-99	Mozilla/5.0 (Linux; Android 10; RMX2063) AppleWebKit/537.36 (KHTML, like Gecko) Chrome/88.0.4324.181 Mobile Safari/537.36	-99
562	0	0	31	5822659	-77	1240	-77	-77	-99	-99	d	2	7	24	2	2	1	0	0	0	0	-99	7	7	6	5	2	1	2	3	1	1	7	7	7	7	7	7	7	7	7	4	7	4	4	-99	-66	Mozilla/5.0 (Linux; Android 8.0.0; SM-A520F) AppleWebKit/537.36 (KHTML, like Gecko) Chrome/89.0.4389.86 Mobile Safari/537.36	-99
563	0	0	32	5822659	-77	-1	-77	-77	-99	-99	d	2	1	19	1	2	0	1	0	0	0	-99	7	7	7	7	7	1	1	1	1	1	7	4	4	1	4	4	1	1	1	7	4	1	1	-99	-99	Mozilla/5.0 (Linux; Android 11; POCO F2 Pro) AppleWebKit/537.36 (KHTML, like Gecko) SamsungBrowser/13.2 Chrome/83.0.4103.106 Mobile Safari/537.36	-99
564	0	0	31	5822659	-77	973	-77	-77	-99	-99	d	2	10	30	1	2	0	1	0	0	0	-99	6	5	2	5	3	3	3	1	1	1	7	0	7	7	7	7	7	7	7	3	7	5	5	-99	-66	Mozilla/5.0 (Windows NT 10.0; Win64; x64; rv:87.0) Gecko/20100101 Firefox/87.0	-99
690	0	0	31	5822659	-77	1105	-77	-77	-99	-99	d	2	1	20	1	2	1	0	0	0	0	-99	5	6	6	4	3	3	3	3	3	3	6	4	4	4	4	4	4	4	4	4	5	3	3	-99	-99	Mozilla/5.0 (iPhone; CPU iPhone OS 14_4_2 like Mac OS X) AppleWebKit/605.1.15 (KHTML, like Gecko) Version/14.0.3 Mobile/15E148 Safari/604.1	-99
567	0	0	31	5822659	-77	2745	-77	-77	-99	-99	d	3	12	29	2	2	1	0	0	0	0	-99	5	5	5	6	0	0	0	0	0	0	0	0	0	0	0	0	0	0	0	0	0	0	0	-99	-99	Mozilla/5.0 (iPhone; CPU iPhone OS 14_4_2 like Mac OS X) AppleWebKit/605.1.15 (KHTML, like Gecko) Version/14.0.3 Mobile/15E148 Safari/604.1	-99
566	0	0	31	5812245	-77	7	-77	-77	-99	-99	d	4	-66	-66	-77	-77	-77	-77	-77	-77	-77	-66	-77	-77	-77	-77	-77	-77	-77	-77	-77	-77	-77	-77	-77	-77	-77	-77	-77	-77	-77	-77	-77	-77	-77	-66	-66	Mozilla/5.0 (iPhone; CPU iPhone OS 14_4_2 like Mac OS X) AppleWebKit/605.1.15 (KHTML, like Gecko) Version/14.0.3 Mobile/15E148 Safari/604.1	-99
569	0	0	31	5822659	-77	2320	-77	-77	-99	-99	d	2	6	28	2	2	1	0	0	0	0	-99	6	6	3	3	1	1	1	1	1	1	7	7	7	7	7	7	7	7	7	1	4	4	4	-99	-99	Mozilla/5.0 (Macintosh; Intel Mac OS X 10_15_6) AppleWebKit/605.1.15 (KHTML, like Gecko) Version/14.0.3 Safari/605.1.15	-99
570	0	0	31	5822659	-77	1401	-77	-77	-99	-99	d	2	2	20	2	2	1	0	0	0	0	-99	1	1	1	2	1	1	1	1	1	1	6	6	5	5	5	5	5	5	5	4	5	5	2	-99	-66	Mozilla/5.0 (iPhone; CPU iPhone OS 14_4_1 like Mac OS X) AppleWebKit/605.1.15 (KHTML, like Gecko) Version/14.0.3 Mobile/15E148 Safari/604.1	-99
571	0	0	31	5822659	-77	1300	-77	-77	-99	-99	d	2	5	22	2	2	1	0	0	0	0	-99	7	3	5	5	3	1	1	1	1	1	7	5	3	4	4	4	5	3	3	3	3	3	3	-99	-66	Mozilla/5.0 (Linux; Android 10; SM-G960F) AppleWebKit/537.36 (KHTML, like Gecko) Chrome/89.0.4389.105 Mobile Safari/537.36	https://wm.hrz.uni-giessen.de/
574	0	0	31	5822659	-77	829	-77	-77	-99	-99	d	2	10	25	1	2	1	0	0	0	0	-99	7	7	1	5	1	1	1	3	1	1	7	7	7	7	5	6	7	7	3	6	5	1	1	-99	-66	Mozilla/5.0 (iPhone; CPU iPhone OS 14_4_2 like Mac OS X) AppleWebKit/605.1.15 (KHTML, like Gecko) Version/14.0.3 Mobile/15E148 Safari/604.1	-99
575	0	0	31	5822659	-77	1020	-77	-77	-99	-99	d	2	5	28	1	2	1	0	0	0	0	-99	4	1	1	1	4	4	4	2	1	2	6	6	5	5	6	6	5	5	5	6	3	3	4	-99	-66	Mozilla/5.0 (Linux; Android 9; SAMSUNG SM-G950F) AppleWebKit/537.36 (KHTML, like Gecko) SamsungBrowser/13.2 Chrome/83.0.4103.106 Mobile Safari/537.36	-99
581	0	0	31	5822659	-77	1266	-77	-77	-99	-99	d	2	5	28	1	2	1	0	0	0	0	-99	7	7	7	6	5	5	4	3	2	1	7	6	7	6	6	5	6	7	4	3	5	6	6	-99	-66	Mozilla/5.0 (Windows NT 10.0; Win64; x64; rv:87.0) Gecko/20100101 Firefox/87.0	-99
578	0	0	31	5822659	-77	922	-77	-77	-99	-99	d	2	8	22	1	2	0	1	0	0	0	-99	5	6	5	5	2	2	6	5	6	5	6	6	5	4	5	6	4	6	7	2	4	3	3	-99	-66	Mozilla/5.0 (Windows NT 10.0; Win64; x64) AppleWebKit/537.36 (KHTML, like Gecko) Chrome/89.0.4389.114 Safari/537.36	-99
577	0	0	31	5822659	-77	1081	-77	-77	-99	-99	d	2	10	31	2	2	0	1	0	0	0	-99	4	6	6	7	2	1	4	4	3	3	7	7	7	7	7	7	7	7	7	7	7	7	7	-99	-66	Mozilla/5.0 (Windows NT 10.0; Win64; x64; rv:87.0) Gecko/20100101 Firefox/87.0	-99
579	0	0	31	5822659	-77	839	-77	-77	-99	-99	d	5	3	21	1	2	1	0	0	0	0	-99	6	6	6	6	5	6	5	6	5	4	6	5	6	5	5	4	4	5	5	5	5	3	5	-99	-66	Mozilla/5.0 (iPhone; CPU iPhone OS 14_4_1 like Mac OS X) AppleWebKit/605.1.15 (KHTML, like Gecko) Version/14.0.3 Mobile/15E148 Safari/604.1	-99
580	0	0	32	5822659	-77	-1	-77	-77	-99	-99	d	2	6	28	2	2	1	0	0	0	0	-99	2	5	6	6	1	1	1	2	1	1	7	7	7	7	7	7	7	7	7	1	1	7	4	-99	-99	Mozilla/5.0 (iPhone; CPU iPhone OS 14_4_2 like Mac OS X) AppleWebKit/605.1.15 (KHTML, like Gecko) Version/14.0.3 Mobile/15E148 Safari/604.1	-99
582	0	0	31	5822659	-77	1092	-77	-77	-99	-99	d	2	4	22	2	2	1	0	0	0	0	-99	5	5	3	5	2	2	1	1	5	3	5	5	3	2	2	2	5	2	2	4	5	3	4	-99	-66	Mozilla/5.0 (iPhone; CPU iPhone OS 14_4 like Mac OS X) AppleWebKit/605.1.15 (KHTML, like Gecko) Version/14.0.3 Mobile/15E148 Safari/604.1	-99
583	0	0	31	5822659	-77	1221	-77	-77	-99	-99	d	2	5	30	2	2	1	0	0	0	0	-99	6	7	5	6	2	2	3	2	2	2	7	6	5	7	1	1	6	3	1	7	4	2	3	-99	-66	Mozilla/5.0 (Linux; Android 9; SAMSUNG SM-G950F) AppleWebKit/537.36 (KHTML, like Gecko) SamsungBrowser/13.2 Chrome/83.0.4103.106 Mobile Safari/537.36	-99
584	0	0	31	5822659	-77	1672	-77	-77	-99	-99	d	2	6	23	1	2	1	0	0	0	0	-99	3	3	6	6	1	1	5	2	2	2	5	3	3	3	3	2	3	5	5	1	2	3	3	-99	-66	Mozilla/5.0 (Macintosh; Intel Mac OS X 10_15_6) AppleWebKit/605.1.15 (KHTML, like Gecko) Version/14.0.3 Safari/605.1.15	https://webmail.stud.uni-giessen.de/horde/imp/dynamic.php?page=mailbox
586	0	0	31	5822659	-77	1928	-77	-77	-99	-99	d	3	12	26	2	2	1	0	0	0	0	-99	5	6	6	5	5	3	5	4	5	3	6	7	2	5	2	2	5	5	4	4	5	2	2	-99	-99	Mozilla/5.0 (iPhone; CPU iPhone OS 14_4_2 like Mac OS X) AppleWebKit/605.1.15 (KHTML, like Gecko) Version/14.0.3 Mobile/15E148 Safari/604.1	-99
585	0	0	31	5822659	-77	1393	-77	-77	-99	-99	d	2	8	29	1	2	1	0	0	0	0	-99	6	7	5	5	3	3	4	5	4	2	6	5	5	5	4	4	5	5	4	4	4	4	4	-99	-66	Mozilla/5.0 (Windows NT 10.0; Win64; x64; rv:87.0) Gecko/20100101 Firefox/87.0	-99
588	0	0	31	5822659	-77	833	-77	-77	-99	-99	d	2	3	25	2	2	1	0	0	0	0	-99	4	4	4	4	3	1	1	1	1	1	7	4	4	4	4	4	4	4	5	4	4	4	4	-99	-66	Mozilla/5.0 (Linux; U; Android 10; de-de; Redmi Note 8 Pro Build/QP1A.190711.020) AppleWebKit/537.36 (KHTML, like Gecko) Version/4.0 Chrome/79.0.3945.147 Mobile Safari/537.36 XiaoMi/MiuiBrowser/12.9.3-gn	-99
590	0	0	31	5822659	-77	759	-77	-77	-99	-99	d	5	2	20	2	2	1	0	0	0	0	-99	3	2	2	3	1	2	1	1	1	1	7	7	7	5	1	1	5	6	5	1	1	2	5	-99	-66	Mozilla/5.0 (iPhone; CPU iPhone OS 14_4_2 like Mac OS X) AppleWebKit/605.1.15 (KHTML, like Gecko) Mobile/15E148 StudoBrowser/4.02.3-ios-studo (https://studo.com/studo-browser-information-and-contact)	-99
593	0	0	31	5822659	-77	864	-77	-77	-99	-99	d	2	11	27	2	2	1	1	0	0	0	-99	5	5	3	3	1	1	5	2	4	4	7	7	7	7	5	6	6	7	4	4	5	2	3	-99	-66	Mozilla/5.0 (iPhone; CPU iPhone OS 13_5_1 like Mac OS X) AppleWebKit/605.1.15 (KHTML, like Gecko) Version/13.1.1 Mobile/15E148 Safari/604.1	-99
596	0	0	31	5822659	-77	3728	-77	-77	-99	-99	d	2	9	22	2	2	1	0	0	0	0	-99	3	6	6	6	2	2	7	6	3	1	7	5	5	5	3	5	5	4	4	4	4	3	3	-99	-99	Mozilla/5.0 (iPhone; CPU iPhone OS 14_4_1 like Mac OS X) AppleWebKit/605.1.15 (KHTML, like Gecko) Version/14.0.3 Mobile/15E148 Safari/604.1	https://wm.hrz.uni-giessen.de/horde/imp/smartmobile.php
595	0	0	31	5812245	-77	5	-77	-77	-99	-99	d	4	-66	-66	-77	-77	-77	-77	-77	-77	-77	-66	-77	-77	-77	-77	-77	-77	-77	-77	-77	-77	-77	-77	-77	-77	-77	-77	-77	-77	-77	-77	-77	-77	-77	-66	-66	Mozilla/5.0 (iPhone; CPU iPhone OS 14_4_1 like Mac OS X) AppleWebKit/605.1.15 (KHTML, like Gecko) Version/14.0.3 Mobile/15E148 Safari/604.1	-99
603	0	0	31	5822659	-77	1027	-77	-77	-99	-99	d	2	4	27	2	2	1	0	0	0	0	-99	4	4	4	4	0	0	0	0	0	0	0	0	0	0	0	0	0	0	0	0	0	0	0	-99	-66	Mozilla/5.0 (Linux; Android 9; SAMSUNG SM-G950F) AppleWebKit/537.36 (KHTML, like Gecko) SamsungBrowser/13.2 Chrome/83.0.4103.106 Mobile Safari/537.36	-99
597	0	0	32	5822659	-77	-1	-77	-77	-99	-99	d	5	5	22	2	2	0	1	0	0	0	-99	5	5	4	4	3	3	2	2	2	2	7	7	7	7	5	7	7	6	6	6	5	4	4	-99	-99	Mozilla/5.0 (iPhone; CPU iPhone OS 14_4_2 like Mac OS X) AppleWebKit/605.1.15 (KHTML, like Gecko) Version/14.0.3 Mobile/15E148 Safari/604.1	-99
598	0	0	32	5822659	-77	-1	-77	-77	-99	-99	d	2	6	27	2	1	1	0	0	0	0	-99	5	5	3	5	4	3	4	3	3	2	7	6	7	5	4	4	5	5	5	2	6	3	3	-99	-99	Mozilla/5.0 (Linux; Android 11; SAMSUNG SM-G780F) AppleWebKit/537.36 (KHTML, like Gecko) SamsungBrowser/13.2 Chrome/83.0.4103.106 Mobile Safari/537.36	-99
599	0	0	31	5822659	-77	1734	-77	-77	-99	-99	d	2	10	27	2	2	1	0	0	0	0	-99	3	2	4	4	1	1	5	2	1	1	6	7	5	6	3	3	6	6	6	3	5	4	3	-99	-99	Mozilla/5.0 (Windows NT 10.0; Win64; x64; rv:87.0) Gecko/20100101 Firefox/87.0	-99
600	0	0	31	5822659	-77	689	-77	-77	-99	-99	d	3	12	26	2	2	1	0	0	0	0	-99	2	3	1	1	1	1	5	6	5	1	5	2	0	0	0	0	0	0	0	0	0	0	0	-99	-66	Mozilla/5.0 (Linux; U; Android 10; de-de; Mi 9 Lite Build/QKQ1.190828.002) AppleWebKit/537.36 (KHTML, like Gecko) Version/4.0 Chrome/79.0.3945.147 Mobile Safari/537.36 XiaoMi/MiuiBrowser/12.9.3-gn	-99
605	0	0	32	5822659	-77	-1	-77	-77	-99	-99	d	2	3	19	2	2	0	0	0	0	1	E-Mail- Verteiler der Uni im Auftrag der „Impf dich“-Gruppe Hamburg	1	1	1	1	0	0	0	0	0	0	7	5	5	5	5	5	5	5	2	3	6	2	2	-99	-99	Mozilla/5.0 (Macintosh; Intel Mac OS X 10_15_6) AppleWebKit/605.1.15 (KHTML, like Gecko) Version/14.0.3 Safari/605.1.15	https://wm.hrz.uni-giessen.de/horde/imp/dynamic.php?page=mailbox
615	0	0	31	5822659	-77	1502	-77	-77	-99	-99	d	2	5	21	2	2	1	0	0	0	0	-99	5	5	4	4	2	2	2	2	2	2	7	4	4	4	4	4	4	4	3	3	5	4	4	-99	-99	Mozilla/5.0 (Windows NT 10.0; Win64; x64; rv:87.0) Gecko/20100101 Firefox/87.0	-99
608	0	0	31	5822659	-77	1295	-77	-77	-99	-99	d	2	10	24	2	2	1	0	0	0	0	-99	5	7	5	5	1	1	1	1	1	5	7	7	7	7	4	7	6	7	7	7	7	5	5	-99	-99	Mozilla/5.0 (Linux; Android 10; moto g(8) power) AppleWebKit/537.36 (KHTML, like Gecko) Chrome/89.0.4389.105 Mobile Safari/537.36	android-app://com.google.android.gm/
609	0	0	31	5822659	-77	1208	-77	-77	-99	-99	d	2	8	26	2	2	0	1	0	0	0	-99	5	6	6	6	2	2	7	6	2	4	7	5	5	5	4	4	5	5	4	5	5	3	3	-99	-99	Mozilla/5.0 (Linux; Android 10; HRY-LX1T) AppleWebKit/537.36 (KHTML, like Gecko) Chrome/88.0.4324.152 Mobile Safari/537.36	https://wm.hrz.uni-giessen.de/
610	0	0	31	5822659	-77	3734	-77	-77	-99	-99	d	2	11	26	2	2	1	0	0	0	0	-99	7	7	4	6	2	1	7	4	4	4	7	7	7	7	7	7	7	7	3	7	4	5	5	-99	-99	Mozilla/5.0 (iPhone; CPU OS 14_4_1 like Mac OS X) AppleWebKit/605.1.15 (KHTML, like Gecko) FxiOS/33.0 Mobile/15E148 Safari/605.1.15	-99
614	0	0	31	5822659	-77	1236	-77	-77	-99	-99	d	2	3	28	2	2	1	0	0	0	0	-99	6	6	3	3	2	2	2	2	2	2	6	6	6	6	2	3	6	6	4	4	4	4	4	-99	-99	Mozilla/5.0 (Windows NT 10.0; Win64; x64; rv:87.0) Gecko/20100101 Firefox/87.0	https://wm.hrz.uni-giessen.de/
617	0	0	31	5822659	-77	1299	-77	-77	-99	-99	d	2	6	28	1	2	1	0	0	0	0	-99	2	4	6	6	0	0	0	0	0	0	0	0	0	0	0	0	0	0	0	0	0	0	0	-99	-99	Mozilla/5.0 (iPhone; CPU iPhone OS 14_4_2 like Mac OS X) AppleWebKit/605.1.15 (KHTML, like Gecko) Version/14.0.3 Mobile/15E148 Safari/604.1	-99
616	0	0	31	5822659	-77	3639	-77	-77	-99	-99	d	2	5	21	2	2	1	0	0	0	0	-99	5	5	4	4	2	2	2	2	1	1	7	7	7	7	7	7	7	7	5	4	4	3	3	-99	-99	Mozilla/5.0 (iPhone; CPU iPhone OS 14_4 like Mac OS X) AppleWebKit/605.1.15 (KHTML, like Gecko) Version/14.0.3 Mobile/15E148 Safari/604.1	-99
612	0	0	31	5822659	-77	1515	-77	-77	-99	-99	d	2	4	21	2	2	0	1	0	0	0	-99	5	5	2	2	0	0	0	0	0	0	0	0	0	0	0	0	0	0	0	0	0	0	0	-99	-99	Mozilla/5.0 (iPhone; CPU iPhone OS 14_4_2 like Mac OS X) AppleWebKit/605.1.15 (KHTML, like Gecko) Version/14.0.3 Mobile/15E148 Safari/604.1	-99
624	0	0	31	5822659	-77	1069	-77	-77	-99	-99	d	2	10	23	2	2	0	1	0	0	0	-99	6	7	7	7	2	2	4	2	1	1	7	7	7	7	7	6	7	7	7	4	4	5	5	Lehrschwerpunkte setzen auf: Wie gehe ich emphatisch mit Impfskeptikern um, ohne sie gleich abzuschrecken? Wie bleibt man mit diesen Patienten im Gespräch? Was glauben Impfskeptiker eigentlich? Was sind die Gründe, warum sie gegen Impfen sind und was sind vielleicht Fake News - wie kann ich die widerlegen?	-99	Mozilla/5.0 (Macintosh; Intel Mac OS X 10_15_7) AppleWebKit/605.1.15 (KHTML, like Gecko) Version/14.0.3 Safari/605.1.15	-99
613	0	0	31	5822659	-77	1047	-77	-77	-99	-99	d	5	3	26	2	2	0	1	1	0	0	-99	2	5	2	3	5	5	3	3	2	2	7	7	7	7	2	5	6	5	3	6	4	2	3	-99	-66	Mozilla/5.0 (Linux; Android 10; CLT-L29) AppleWebKit/537.36 (KHTML, like Gecko) Chrome/89.0.4389.105 Mobile Safari/537.36	-99
622	0	0	31	5822659	-77	1002	-77	-77	-99	-99	d	2	1	19	1	2	0	1	0	0	0	-99	5	6	5	2	4	4	4	4	4	4	7	4	7	7	5	4	7	5	6	2	2	4	6	-99	-99	Mozilla/5.0 (Windows NT 10.0; Win64; x64) AppleWebKit/537.36 (KHTML, like Gecko) Chrome/89.0.4389.90 Safari/537.36	-99
619	0	0	31	5822659	-77	1625	-77	-77	-99	-99	d	2	10	35	1	2	1	0	0	0	0	-99	4	1	2	4	1	1	6	1	1	1	6	6	6	6	4	4	4	5	5	2	4	4	4	Man sollte anfangen welchen zu betreiben.	Warum wird so selten darüber gesprochen, dass Inpchargen Probleme mit der Aufreinigung haben, dass Moderna angegeben hat, dass nur rund die Hälfte der mRNA in ihrem Impfstoff tatsächlich integer ist. Was passiert mit den Nanolipidtröpchen, die die Blut-Hirnschranke überwinden. Was passiert mit der nicht komplett durch DNAsen verdauten linearen cDNA. Hier wurde von Moderna eine Verunreinigung zuge…	Mozilla/5.0 (iPhone; CPU iPhone OS 13_6_1 like Mac OS X) AppleWebKit/605.1.15 (KHTML, like Gecko) Version/13.1.2 Mobile/15E148 Safari/604.1	-99
620	0	0	31	5822659	-77	1230	-77	-77	-99	-99	d	2	2	26	2	2	1	0	0	0	0	-99	2	4	2	6	2	2	2	1	1	2	7	5	7	4	6	5	4	5	5	5	5	2	3	-99	-99	Mozilla/5.0 (iPhone; CPU iPhone OS 14_4_1 like Mac OS X) AppleWebKit/605.1.15 (KHTML, like Gecko) Version/14.0.3 Mobile/15E148 Safari/604.1	-99
621	0	0	31	5822659	-77	3401	-77	-77	-99	-99	d	2	5	22	2	2	1	1	0	0	0	-99	6	6	4	3	5	5	6	7	4	4	6	6	7	7	4	4	5	6	4	6	7	2	2	-99	-99	Mozilla/5.0 (iPhone; CPU iPhone OS 14_4_2 like Mac OS X) AppleWebKit/605.1.15 (KHTML, like Gecko) Version/14.0.3 Mobile/15E148 Safari/604.1	-99
623	0	0	31	5822659	-77	1625	-77	-77	-99	-99	d	2	9	24	2	2	1	1	0	0	0	-99	2	3	5	3	1	1	2	1	1	1	7	5	6	6	2	4	5	5	3	7	7	1	2	-99	-99	Mozilla/5.0 (Linux; Android 9; ANE-LX1) AppleWebKit/537.36 (KHTML, like Gecko) Chrome/85.0.4183.127 Mobile Safari/537.36 (Ecosia android@85.0.4183.127)	-99
625	0	0	31	5822659	-77	605	-77	-77	-99	-99	d	2	7	22	2	2	1	0	0	0	0	-99	7	7	7	5	1	1	1	1	1	1	7	7	7	7	6	6	6	6	6	1	7	2	2	-99	-66	Mozilla/5.0 (Macintosh; Intel Mac OS X 10_15_5) AppleWebKit/605.1.15 (KHTML, like Gecko) Version/13.1.1 Safari/605.1.15	-99
626	0	0	31	5822659	-77	861	-77	-77	-99	-99	d	2	1	22	2	2	1	0	0	0	0	-99	6	7	5	6	5	4	4	4	3	2	7	7	7	7	7	7	7	7	4	4	7	5	5	-99	-99	Mozilla/5.0 (Linux; Android 8.0.0; SM-A520F) AppleWebKit/537.36 (KHTML, like Gecko) Chrome/89.0.4389.105 Mobile Safari/537.36	android-app://com.google.android.gm/
630	0	0	32	5822659	-77	-1	-77	-77	-99	-99	d	3	13	26	1	2	1	0	0	0	0	-99	5	7	6	5	0	0	4	4	3	2	7	5	5	5	4	5	4	5	5	3	5	2	2	-99	-99	Mozilla/5.0 (iPhone; CPU iPhone OS 14_4_2 like Mac OS X) AppleWebKit/605.1.15 (KHTML, like Gecko) Version/14.0.3 Mobile/15E148 Safari/604.1	-99
632	0	0	31	5822659	-77	2844	-77	-77	-99	-99	d	2	6	22	2	2	1	0	0	0	0	-99	7	6	4	5	1	1	1	2	1	1	7	7	7	7	7	7	7	7	2	6	4	5	5	-99	-99	Mozilla/5.0 (Linux; Android 10; SM-A505FN) AppleWebKit/537.36 (KHTML, like Gecko) Chrome/88.0.4324.181 Mobile Safari/537.36 (Ecosia android@88.0.4324.181)	-99
628	0	0	31	5822659	-77	1292	-77	-77	-99	-99	d	2	8	23	2	2	1	0	0	0	0	-99	7	7	6	2	1	1	4	1	1	3	5	4	2	5	2	6	4	4	1	5	2	2	2	-99	Manche Fragen sind doppelt	Mozilla/5.0 (iPhone; CPU iPhone OS 14_4_1 like Mac OS X) AppleWebKit/605.1.15 (KHTML, like Gecko) Version/14.0.3 Mobile/15E148 Safari/604.1	-99
627	0	0	31	5822659	-77	906	-77	-77	-99	-99	d	2	8	22	2	2	1	0	0	0	0	-99	4	4	3	4	1	1	2	3	1	1	5	6	6	6	5	6	6	6	5	1	3	3	4	-99	-99	Mozilla/5.0 (iPhone; CPU iPhone OS 14_4_2 like Mac OS X) AppleWebKit/605.1.15 (KHTML, like Gecko) Version/14.0.3 Mobile/15E148 Safari/604.1	-99
629	0	0	32	5822659	-77	-1	-77	-77	-99	-99	d	2	3	25	2	2	1	0	0	0	0	-99	5	5	4	4	2	2	2	2	2	2	7	6	6	6	6	4	5	6	6	3	3	4	5	-99	-99	Mozilla/5.0 (Windows NT 10.0; Win64; x64) AppleWebKit/537.36 (KHTML, like Gecko) Chrome/89.0.4389.114 Safari/537.36	https://wm.hrz.uni-giessen.de/
635	0	0	31	5822659	-77	792	-77	-77	-99	-99	d	5	6	24	2	2	1	0	0	0	0	-99	1	1	1	1	1	1	1	1	1	1	6	4	4	4	2	2	1	2	2	2	2	2	2	-99	-99	Mozilla/5.0 (Macintosh; Intel Mac OS X 10_15_6) AppleWebKit/605.1.15 (KHTML, like Gecko) Version/14.0.3 Safari/605.1.15	-99
637	0	0	31	5822659	-77	1083	-77	-77	-99	-99	d	2	8	33	2	2	0	1	0	0	0	-99	6	7	5	4	3	1	6	6	4	3	5	4	5	5	4	4	4	5	2	6	4	4	4	-99	-99	Mozilla/5.0 (iPhone; CPU iPhone OS 14_4_2 like Mac OS X) AppleWebKit/605.1.15 (KHTML, like Gecko) Version/14.0.3 Mobile/15E148 Safari/604.1	-99
636	0	0	31	5822659	-77	1102	-77	-77	-99	-99	d	2	5	35	1	2	0	1	0	0	0	-99	3	4	6	6	4	2	3	2	3	1	7	5	6	6	6	4	6	0	6	6	6	2	2	-99	-99	Mozilla/5.0 (Windows NT 10.0; Win64; x64; rv:87.0) Gecko/20100101 Firefox/87.0	-99
638	0	0	31	5822659	-77	1310	-77	-77	-99	-99	d	2	5	30	2	2	0	1	0	0	0	-99	5	5	4	5	7	2	2	2	2	2	6	7	7	6	4	4	4	6	4	4	4	1	1	-99	-99	Mozilla/5.0 (iPhone; CPU iPhone OS 14_4_1 like Mac OS X) AppleWebKit/605.1.15 (KHTML, like Gecko) Version/14.0.3 Mobile/15E148 Safari/604.1	https://wm.hrz.uni-giessen.de/horde/imp/smartmobile.php
640	0	0	32	5822659	-77	-1	-77	-77	-99	-99	d	2	3	26	1	2	1	0	0	0	0	-99	1	2	1	1	2	2	2	1	1	1	7	5	5	6	5	3	6	5	5	6	7	3	1	-99	-99	Mozilla/5.0 (Linux; Android 11; AC2003 Build/RP1A.201005.001; wv) AppleWebKit/537.36 (KHTML, like Gecko) Version/4.0 Chrome/89.0.4389.105 Mobile Safari/537.36 StudoBrowser/4.02.4-android-studo (https://studo.com/studo-browser-information-and-contact)	-99
641	0	0	31	5822659	-77	1761	-77	-77	-99	-99	d	2	5	27	1	2	1	0	0	0	0	-99	6	6	6	6	7	5	2	2	2	2	7	5	4	5	4	3	5	5	5	4	4	3	3	-99	-99	Mozilla/5.0 (Windows NT 10.0; Win64; x64) AppleWebKit/537.36 (KHTML, like Gecko) Chrome/89.0.4389.90 Safari/537.36 Edg/89.0.774.63	https://wm.hrz.uni-giessen.de/
642	0	0	31	5822659	-77	1079	-77	-77	-99	-99	d	3	13	23	2	2	1	1	0	0	0	-99	1	5	5	5	1	1	6	4	3	1	7	7	7	7	1	7	7	7	4	5	7	4	4	-99	-99	Mozilla/5.0 (iPhone; CPU iPhone OS 14_4 like Mac OS X) AppleWebKit/605.1.15 (KHTML, like Gecko) Version/14.0.3 Mobile/15E148 Safari/604.1	-99
643	0	0	31	5822659	-77	3004	-77	-77	-99	-99	d	2	7	22	2	2	1	0	0	0	0	-99	5	5	5	5	3	2	4	5	5	5	7	6	6	6	5	5	5	6	5	3	6	4	4	-99	-99	Mozilla/5.0 (iPhone; CPU iPhone OS 14_4_1 like Mac OS X) AppleWebKit/605.1.15 (KHTML, like Gecko) Version/14.0.3 Mobile/15E148 Safari/604.1	https://wm.hrz.uni-giessen.de/horde/imp/smartmobile.php
645	0	0	31	5822659	-77	1380	-77	-77	-99	-99	d	2	4	22	2	2	0	1	0	0	0	-99	7	7	7	5	3	5	3	3	4	4	6	5	5	6	6	6	6	5	5	5	5	4	4	-99	-99	Mozilla/5.0 (Windows NT 10.0; Win64; x64) AppleWebKit/537.36 (KHTML, like Gecko) Chrome/89.0.4389.90 Safari/537.36	https://wm.hrz.uni-giessen.de/
953	0	0	31	5822659	-77	1764	-77	-77	-99	-99	d	2	4	26	1	2	1	0	0	0	0	-99	5	5	5	5	3	1	1	1	1	1	7	6	5	5	5	5	5	5	3	5	6	2	3	-99	-99	Mozilla/5.0 (iPhone; CPU iPhone OS 14_4_2 like Mac OS X) AppleWebKit/605.1.15 (KHTML, like Gecko) Version/14.0.3 Mobile/15E148 Safari/604.1	-99
646	0	0	31	5822659	-77	982	-77	-77	-99	-99	d	2	7	22	1	2	0	1	0	0	0	-99	7	7	5	7	5	3	5	6	6	6	7	7	7	7	7	7	7	7	4	4	4	2	2	-99	-99	Mozilla/5.0 (iPhone; CPU iPhone OS 14_4_1 like Mac OS X) AppleWebKit/605.1.15 (KHTML, like Gecko) Version/14.0.3 Mobile/15E148 Safari/604.1	-99
647	0	0	31	5822659	-77	1073	-77	-77	-99	-99	d	2	7	23	2	2	1	0	0	0	0	-99	7	7	7	7	3	3	7	1	1	1	7	7	7	7	4	7	7	7	1	7	1	1	1	-99	-99	Mozilla/5.0 (iPhone; CPU iPhone OS 14_4_2 like Mac OS X) AppleWebKit/605.1.15 (KHTML, like Gecko) Version/14.0.3 Mobile/15E148 Safari/604.1	-99
650	0	0	31	5822659	-77	962	-77	-77	-99	-99	d	2	4	28	1	2	1	0	0	0	0	-99	1	3	3	1	3	4	4	4	4	4	4	4	4	4	4	4	4	4	4	4	3	0	0	-99	-99	Mozilla/5.0 (Linux; Android 9; SM-N950F) AppleWebKit/537.36 (KHTML, like Gecko) Chrome/89.0.4389.105 Mobile Safari/537.36	-99
648	0	0	31	5822659	-77	1590	-77	-77	-99	-99	d	2	9	23	2	1	1	0	0	0	0	-99	7	7	7	7	6	6	5	2	6	6	7	7	7	7	7	7	7	7	7	7	7	7	7	-99	-99	Mozilla/5.0 (Linux; Android 11; SM-G970F) AppleWebKit/537.36 (KHTML, like Gecko) Chrome/89.0.4389.105 Mobile Safari/537.36	-99
649	0	0	32	5822659	-77	-1	-77	-77	-99	-99	d	2	2	25	2	2	1	0	0	0	0	-99	3	3	2	1	1	1	1	1	1	1	7	7	6	6	2	2	7	7	1	1	7	1	1	-99	-99	Mozilla/5.0 (Windows NT 10.0; Win64; x64; rv:87.0) Gecko/20100101 Firefox/87.0	https://wm.hrz.uni-giessen.de/
652	0	0	32	5822659	-77	-1	-77	-77	-99	-99	d	5	3	29	2	2	1	0	0	0	0	-99	4	1	2	2	1	1	1	1	1	1	7	7	4	4	4	2	6	2	6	2	2	1	1	-99	Viel zu langer Fragebogen.	Mozilla/5.0 (iPhone; CPU iPhone OS 14_4_2 like Mac OS X) AppleWebKit/605.1.15 (KHTML, like Gecko) Version/14.0.3 Mobile/15E148 Safari/604.1	-99
653	0	0	31	5812245	-77	12	-77	-77	-99	-99	d	1	-66	-66	-77	-77	-77	-77	-77	-77	-77	-66	-77	-77	-77	-77	-77	-77	-77	-77	-77	-77	-77	-77	-77	-77	-77	-77	-77	-77	-77	-77	-77	-77	-77	-66	-66	Mozilla/5.0 (iPhone; CPU iPhone OS 14_4_2 like Mac OS X) AppleWebKit/605.1.15 (KHTML, like Gecko) Version/14.0.3 Mobile/15E148 Safari/604.1	-99
654	0	0	31	5822659	-77	1193	-77	-77	-99	-99	d	2	5	24	2	2	1	0	0	0	0	-99	2	6	6	7	6	6	5	4	1	1	7	5	4	6	4	4	7	4	4	4	4	4	5	-99	-99	Mozilla/5.0 (Macintosh; Intel Mac OS X 10_15_4) AppleWebKit/605.1.15 (KHTML, like Gecko) Version/13.1.2 Safari/605.1.15	-99
655	0	0	31	5822659	-77	604	-77	-77	-99	-99	d	2	2	25	1	2	1	0	0	0	0	-99	2	2	2	2	3	1	1	2	1	1	7	5	5	6	6	5	5	5	5	2	2	1	1	-99	-99	Mozilla/5.0 (Macintosh; Intel Mac OS X 10_15_6) AppleWebKit/605.1.15 (KHTML, like Gecko) Version/14.0.3 Safari/605.1.15	-99
662	0	0	31	5822659	-77	1273	-77	-77	-99	-99	d	2	8	25	2	2	1	0	0	0	0	-99	6	6	6	6	5	5	5	3	4	3	5	6	6	5	5	5	6	7	4	4	4	5	5	-99	-99	Mozilla/5.0 (iPhone; CPU iPhone OS 14_4 like Mac OS X) AppleWebKit/605.1.15 (KHTML, like Gecko) Version/14.0.3 Mobile/15E148 Safari/604.1	-99
664	0	0	31	5822659	-77	1292	-77	-77	-99	-99	d	2	8	22	2	2	1	0	0	0	0	-99	7	7	6	6	4	4	4	4	4	4	7	7	7	7	7	1	7	7	7	7	7	1	1	-99	-99	Mozilla/5.0 (Windows NT 10.0; Win64; x64) AppleWebKit/537.36 (KHTML, like Gecko) Chrome/89.0.4389.90 Safari/537.36	https://email.t-online.de/
663	0	0	31	5822659	-77	1053	-77	-77	-99	-99	d	5	6	20	2	2	1	0	0	0	0	-99	5	6	5	4	0	0	0	0	0	0	0	0	0	0	0	0	0	0	0	0	0	0	0	-99	-99	Mozilla/5.0 (iPhone; CPU iPhone OS 14_4_1 like Mac OS X) AppleWebKit/605.1.15 (KHTML, like Gecko) Version/14.0.3 Mobile/15E148 Safari/604.1	https://wm.hrz.uni-giessen.de/horde/imp/smartmobile.php
666	0	0	31	5812245	-77	26	-77	-77	-99	-99	d	6	-66	-66	-77	-77	-77	-77	-77	-77	-77	-66	-77	-77	-77	-77	-77	-77	-77	-77	-77	-77	-77	-77	-77	-77	-77	-77	-77	-77	-77	-77	-77	-77	-77	-66	-66	Mozilla/5.0 (Linux; Android 10; VOG-L29) AppleWebKit/537.36 (KHTML, like Gecko) Chrome/89.0.4389.105 Mobile Safari/537.36	-99
669	0	0	31	5822659	-77	909	-77	-77	-99	-99	d	2	8	31	1	2	0	1	0	0	0	-99	4	3	3	2	3	3	6	3	2	2	6	4	4	5	5	5	5	5	4	5	6	5	4	-99	-99	Mozilla/5.0 (Windows NT 10.0; Win64; x64; rv:87.0) Gecko/20100101 Firefox/87.0	https://webmail.stud.uni-giessen.de/
668	0	0	31	5822659	-77	1009	-77	-77	-99	-99	d	2	10	22	2	2	1	0	0	0	0	-99	5	5	3	5	2	1	1	1	2	4	5	5	4	5	3	3	5	5	3	4	4	2	2	-99	-99	Mozilla/5.0 (Linux; Android 10; SAMSUNG SM-A515F) AppleWebKit/537.36 (KHTML, like Gecko) SamsungBrowser/13.2 Chrome/83.0.4103.106 Mobile Safari/537.36	-99
670	0	0	31	5812245	-77	20	-77	-77	-99	-99	d	1	-66	-66	-77	-77	-77	-77	-77	-77	-77	-66	-77	-77	-77	-77	-77	-77	-77	-77	-77	-77	-77	-77	-77	-77	-77	-77	-77	-77	-77	-77	-77	-77	-77	-66	-66	Mozilla/5.0 (Macintosh; Intel Mac OS X 10_15_6) AppleWebKit/605.1.15 (KHTML, like Gecko) Version/14.0.3 Safari/605.1.15	-99
671	0	0	31	5822659	-77	1997	-77	-77	-99	-99	d	2	9	32	1	2	1	0	0	0	0	-99	6	6	2	2	2	1	5	2	3	2	7	7	5	5	5	2	5	6	6	2	3	1	1	-99	-99	Mozilla/5.0 (Linux; Android 10; LYA-L29) AppleWebKit/537.36 (KHTML, like Gecko) Chrome/87.0.4280.141 Mobile Safari/537.36 OPR/62.3.3146.57763	-99
672	0	0	31	5822659	-77	1116	-77	-77	-99	-99	d	3	12	26	2	2	1	0	0	0	0	-99	7	7	2	2	4	3	6	6	6	1	7	7	7	4	1	1	5	7	1	4	4	1	1	Im Fach Allgemeinmedizin nochmals darauf eingehen und Vor- und Nachteile aufführen (insbesondere praktische Beispiele, die absolut oder relativ gegen eine Impfung sprechen).	Insgesamt gesehen sind Studenten im letzten PJ-Tertial hier etwas zu kurz gekommen: Impfungen wurden erst im letzten Tertial möglich, abzüglich der Fehltage blieben kaum noch Tage mit Patientenkontakt. In der Klinik, wo ich zuletzt war, wurde erst relativ spät geimpft. Viele Angestellte mit mehr Patientenkontakt hatten noch gar keine Impfung erhalten, sodass diese Personen eher impfberechtigt war…	Mozilla/5.0 (Windows NT 10.0; Win64; x64; rv:87.0) Gecko/20100101 Firefox/87.0	-99
673	0	0	31	5822659	-77	621	-77	-77	-99	-99	d	2	2	23	2	2	1	0	0	0	0	-99	7	7	6	6	2	1	1	1	1	1	7	7	7	7	7	6	7	7	0	0	6	0	0	-99	-99	Mozilla/5.0 (iPhone; CPU iPhone OS 14_4_2 like Mac OS X) AppleWebKit/605.1.15 (KHTML, like Gecko) Version/14.0.3 Mobile/15E148 Safari/604.1	-99
674	0	0	31	5822659	-77	1049	-77	-77	-99	-99	d	2	10	24	1	2	0	1	0	0	0	-99	6	7	7	7	1	1	4	2	1	1	7	7	4	6	2	2	7	5	1	7	1	1	1	Aus meiner Sicht spielt weniger die Form (digital vs. Präsenz) eine Rolle (daher würde ich in der momentanen Situation stets für digital plädieren), als die Inhalte. Es ist wichtig, sich mit gängigen Fehlinformationen, die bewusst oder unbewusst von vielen Menschen verbreitet werden auseinanderzusetzen, sie zu kennen und zu lernen, warum sie nicht zutreffen.	-99	Mozilla/5.0 (Macintosh; Intel Mac OS X 10_15_6) AppleWebKit/605.1.15 (KHTML, like Gecko) Version/14.0.3 Safari/605.1.15	-99
676	0	0	31	5822659	-77	1055	-77	-77	-99	-99	d	2	6	22	2	2	1	0	0	0	0	-99	4	5	5	5	4	4	4	4	4	4	7	7	7	7	7	7	7	6	4	4	4	4	4	-99	-99	Mozilla/5.0 (iPhone; CPU iPhone OS 14_4_1 like Mac OS X) AppleWebKit/605.1.15 (KHTML, like Gecko) Version/14.0.3 Mobile/15E148 Safari/604.1	-99
736	0	0	31	5822659	-77	1836	-77	-77	-99	-99	d	3	12	43	2	2	0	1	0	0	0	-99	5	7	7	7	1	1	7	6	2	1	7	7	7	7	6	6	7	7	4	4	4	1	1	-99	-99	Mozilla/5.0 (Macintosh; Intel Mac OS X 10.13; rv:85.0) Gecko/20100101 Firefox/85.0	-99
679	0	0	31	5822659	-77	1573	-77	-77	-99	-99	d	2	10	23	2	2	1	0	0	0	0	-99	7	7	7	6	1	1	6	1	2	3	7	7	7	7	7	6	7	6	2	4	4	5	5	Thematisieren in Vorlesung und Seminar Allgemeinmedizin und Durchführung von impfgesprächen untereinander und mit schauspielpatienten	Mir fehlte t.w. Die antwortmöglichkeiten zwischen den extremen, die meine Antworten konkreter abgebildet hätten. Mir fehlte die Frage, aus welchen Medien ich meine Informationen zu Covid und den Impfungen beziehe und welche ich gut und weniger gut finde. Wichtig fand ich, dass astrazeneca getrennt betrachtet wurde.	Mozilla/5.0 (Linux; Android 9; ANE-LX1) AppleWebKit/537.36 (KHTML, like Gecko) Chrome/89.0.4389.105 Mobile Safari/537.36	-99
680	0	0	32	5822659	-77	-1	-77	-77	-99	-99	d	2	3	26	2	2	1	0	0	0	0	-99	5	3	3	5	2	2	2	2	2	3	7	7	6	6	6	5	5	5	5	4	5	4	5	-99	-99	Mozilla/5.0 (iPhone; CPU iPhone OS 14_4_1 like Mac OS X) AppleWebKit/605.1.15 (KHTML, like Gecko) Version/14.0.3 Mobile/15E148 Safari/604.1	-99
684	0	0	31	5822659	-77	1714	-77	-77	-99	-99	d	2	12	31	1	2	1	0	0	0	0	-99	6	6	4	4	4	4	7	7	6	6	7	6	6	6	5	4	7	6	6	4	5	5	5	-99	-99	Mozilla/5.0 (Linux; Android 8.1.0; Moto G (5S) Plus) AppleWebKit/537.36 (KHTML, like Gecko) Chrome/89.0.4389.105 Mobile Safari/537.36	-99
683	0	0	31	5822659	-77	1326	-77	-77	-99	-99	d	2	4	20	2	2	0	1	0	0	0	-99	6	6	3	6	2	2	1	1	1	1	7	7	7	7	7	7	7	5	2	6	7	5	5	-99	-99	Mozilla/5.0 (Macintosh; Intel Mac OS X 10_15_6) AppleWebKit/605.1.15 (KHTML, like Gecko) Version/14.0.2 Safari/605.1.15	-99
686	0	0	31	5822659	-77	1089	-77	-77	-99	-99	d	2	3	19	1	2	1	0	0	0	0	-99	6	6	6	6	5	5	5	5	7	6	7	7	7	7	7	7	7	7	7	3	3	7	7	-99	-99	Mozilla/5.0 (iPhone; CPU iPhone OS 12_5_2 like Mac OS X) AppleWebKit/605.1.15 (KHTML, like Gecko) Version/12.1.2 Mobile/15E148 Safari/604.1	-99
687	0	0	31	5822659	-77	1175	-77	-77	-99	-99	d	2	4	25	1	2	1	0	0	0	0	-99	5	5	6	6	4	6	3	3	3	3	6	5	5	4	3	3	5	6	6	2	4	1	1	-99	-99	Mozilla/5.0 (Macintosh; Intel Mac OS X 10_15_6) AppleWebKit/605.1.15 (KHTML, like Gecko) Version/14.0.3 Safari/605.1.15	https://student.uniklinikum-leipzig.de/studium/allgemeines_interessantes.php
689	0	0	31	5822659	-77	1132	-77	-77	-99	-99	d	2	9	23	2	2	1	0	0	0	0	-99	7	7	7	7	2	1	5	5	1	1	7	7	7	7	7	7	7	7	4	1	3	4	4	-99	-99	Mozilla/5.0 (iPhone; CPU iPhone OS 14_4_1 like Mac OS X) AppleWebKit/605.1.15 (KHTML, like Gecko) Version/14.0.3 Mobile/15E148 Safari/604.1	-99
691	0	0	31	5822659	-77	835	-77	-77	-99	-99	d	5	6	21	1	2	1	0	0	0	0	-99	6	6	3	3	2	3	3	5	5	4	7	7	7	7	3	3	6	6	6	6	6	6	5	-99	-99	Mozilla/5.0 (Macintosh; Intel Mac OS X 10_15_6) AppleWebKit/605.1.15 (KHTML, like Gecko) Version/14.0.3 Safari/605.1.15	-99
693	0	0	31	5822659	-77	1004	-77	-77	-99	-99	d	2	6	25	1	2	1	0	0	0	0	-99	6	7	7	7	2	2	2	2	2	2	6	6	5	5	3	5	5	5	5	3	6	3	3	-99	-99	Mozilla/5.0 (Macintosh; Intel Mac OS X 10_15_6) AppleWebKit/605.1.15 (KHTML, like Gecko) Version/14.0.3 Safari/605.1.15	-99
696	0	0	31	5822659	-77	1871	-77	-77	-99	-99	d	2	5	22	2	2	1	0	0	0	0	-99	7	4	1	1	5	2	1	1	2	1	7	7	7	7	7	7	7	7	7	1	4	6	5	-99	-99	Mozilla/5.0 (iPhone; CPU iPhone OS 14_4_2 like Mac OS X) AppleWebKit/605.1.15 (KHTML, like Gecko) Version/14.0.3 Mobile/15E148 Safari/604.1	-99
698	0	0	31	5822659	-77	754	-77	-77	-99	-99	d	2	4	20	2	2	1	1	0	0	0	-99	5	5	2	2	3	2	1	1	1	1	7	6	7	6	7	7	7	6	5	3	7	6	3	-99	-99	Mozilla/5.0 (Macintosh; Intel Mac OS X 10_15_6) AppleWebKit/605.1.15 (KHTML, like Gecko) Version/14.0.3 Safari/605.1.15	https://wm.hrz.uni-giessen.de/horde/imp/dynamic.php?page=mailbox
697	0	0	31	5822659	-77	787	-77	-77	-99	-99	d	2	10	28	2	2	0	1	0	0	0	-99	5	5	5	5	2	2	5	4	2	1	7	7	7	6	6	6	7	6	6	6	6	5	5	-99	Nein	Mozilla/5.0 (Linux; Android 9; SAMSUNG SM-G950F) AppleWebKit/537.36 (KHTML, like Gecko) SamsungBrowser/13.2 Chrome/83.0.4103.106 Mobile Safari/537.36	-99
699	0	0	31	5822659	-77	824	-77	-77	-99	-99	d	2	10	25	2	2	1	1	0	0	0	-99	6	7	4	6	1	1	5	5	5	3	7	7	6	7	6	6	7	7	7	6	6	7	7	-99	-99	Mozilla/5.0 (Windows NT 10.0; Win64; x64) AppleWebKit/537.36 (KHTML, like Gecko) Chrome/89.0.4389.90 Safari/537.36	-99
700	0	0	31	5822659	-77	813	-77	-77	-99	-99	d	2	2	28	1	2	1	0	0	0	0	-99	4	5	5	7	5	4	4	5	4	2	5	5	5	4	0	5	5	4	4	4	0	0	0	-99	-99	Mozilla/5.0 (Linux; Android 10; XQ-AS52) AppleWebKit/537.36 (KHTML, like Gecko) Chrome/89.0.4389.105 Mobile Safari/537.36	android-app://com.google.android.gm/
702	0	0	31	5822659	-77	788	-77	-77	-99	-99	d	2	2	20	1	2	1	0	0	0	0	-99	1	2	2	6	1	1	1	1	1	1	7	6	7	1	3	3	3	5	7	1	1	4	1	-99	-99	Mozilla/5.0 (Windows NT 10.0; Win64; x64) AppleWebKit/537.36 (KHTML, like Gecko) Chrome/89.0.4389.90 Safari/537.36 Edg/89.0.774.63	https://wm.hrz.uni-giessen.de/
705	0	0	31	5822659	-77	656	-77	-77	-99	-99	d	2	6	30	1	2	1	0	0	0	0	-99	1	7	7	5	1	1	2	2	1	1	4	2	1	1	1	1	1	7	4	4	4	2	1	-99	-99	Mozilla/5.0 (Macintosh; Intel Mac OS X 10_15_6) AppleWebKit/605.1.15 (KHTML, like Gecko) Version/14.0.3 Safari/605.1.15	-99
704	0	0	32	5822659	-77	-1	-77	-77	-99	-99	d	5	6	21	1	2	1	0	0	0	0	-99	2	1	1	2	2	0	2	2	2	2	5	5	5	5	5	2	5	5	1	1	7	2	2	-99	-99	Mozilla/5.0 (Windows NT 10.0; Win64; x64) AppleWebKit/537.36 (KHTML, like Gecko) Chrome/89.0.4389.114 Safari/537.36	-99
703	0	0	32	5822659	-77	-1	-77	-77	-99	-99	d	2	3	19	2	2	0	1	0	0	0	-99	6	6	7	5	1	1	1	1	1	1	7	4	4	7	3	3	7	4	3	2	2	2	2	-99	-99	Mozilla/5.0 (iPhone; CPU iPhone OS 14_4_1 like Mac OS X) AppleWebKit/605.1.15 (KHTML, like Gecko) Version/14.0.3 Mobile/15E148 Safari/604.1	-99
711	0	0	32	5822659	-77	-1	-77	-77	-99	-99	d	2	3	20	2	2	1	0	0	0	0	-99	5	7	6	3	5	7	3	2	5	2	7	5	5	2	3	2	5	7	3	5	7	4	4	-99	-99	Mozilla/5.0 (Linux; Android 11; SM-A405FN) AppleWebKit/537.36 (KHTML, like Gecko) Chrome/89.0.4389.105 Mobile Safari/537.36	-99
708	0	0	31	5822659	-77	1004	-77	-77	-99	-99	d	2	7	25	2	2	0	1	0	0	0	-99	7	7	6	5	1	1	5	3	1	1	7	7	7	7	7	7	7	7	7	7	7	4	4	-99	-99	Mozilla/5.0 (Linux; Android 10; SAMSUNG SM-G960F) AppleWebKit/537.36 (KHTML, like Gecko) SamsungBrowser/13.2 Chrome/83.0.4103.106 Mobile Safari/537.36	-99
709	0	0	31	5822659	-77	1363	-77	-77	-99	-99	d	2	10	26	2	2	1	0	0	0	0	-99	5	6	3	3	2	2	5	2	3	1	7	7	7	7	6	6	7	7	4	5	7	5	5	-99	-99	Mozilla/5.0 (Linux; Android 11; SM-G973F) AppleWebKit/537.36 (KHTML, like Gecko) Chrome/89.0.4389.105 Mobile Safari/537.36	-99
713	0	0	31	5822659	-77	3633	-77	-77	-99	-99	d	2	3	25	2	2	1	0	0	0	0	-99	7	7	6	7	1	1	1	1	1	1	6	6	4	4	4	4	7	4	2	5	2	2	2	-99	-99	Mozilla/5.0 (Windows NT 10.0; Win64; x64) AppleWebKit/537.36 (KHTML, like Gecko) Chrome/89.0.4389.114 Safari/537.36	https://webmail.stud.uni-giessen.de/
720	0	0	32	5822659	-77	-1	-77	-77	-99	-99	d	2	9	25	2	2	1	0	0	0	0	-99	5	5	3	3	2	2	5	4	3	2	7	6	6	6	5	5	5	5	5	5	5	5	4	-99	-99	Mozilla/5.0 (Macintosh; Intel Mac OS X 10_13_6) AppleWebKit/605.1.15 (KHTML, like Gecko) Version/13.1.2 Safari/605.1.15	-99
710	0	0	31	5822659	-77	836	-77	-77	-99	-99	d	2	5	22	2	2	1	0	0	0	0	-99	5	6	1	1	3	3	3	3	3	3	7	7	7	7	7	7	7	7	7	7	7	7	7	-99	-99	Mozilla/5.0 (Windows NT 10.0; Win64; x64; rv:77.0) Gecko/20100101 Firefox/77.0	https://webmail.stud.uni-giessen.de/horde/imp/dynamic.php?page=mailbox
712	0	0	31	5822659	-77	1038	-77	-77	-99	-99	d	2	3	27	1	2	0	1	0	0	0	-99	6	7	6	6	3	1	3	2	2	1	7	6	3	6	2	2	6	4	5	7	5	4	3	-99	Einige Fragen im Verlauf sind nicht sinnvoll, wenn man schon geimpft wurde.	Mozilla/5.0 (iPhone; CPU iPhone OS 14_4_2 like Mac OS X) AppleWebKit/605.1.15 (KHTML, like Gecko) Version/14.0.3 Mobile/15E148 Safari/604.1	-99
715	0	0	31	5822659	-77	1606	-77	-77	-99	-99	d	2	6	28	2	2	0	1	0	0	0	-99	7	7	5	4	3	2	3	3	3	1	7	7	7	7	7	7	7	7	7	5	7	5	5	-99	-99	Mozilla/5.0 (Linux; Android 11; SM-A515F) AppleWebKit/537.36 (KHTML, like Gecko) Chrome/89.0.4389.105 Mobile Safari/537.36	-99
714	0	0	31	5822659	-77	2872	-77	-77	-99	-99	d	2	2	20	1	2	1	0	0	0	0	-99	6	6	6	4	2	2	1	1	1	2	6	7	7	7	1	2	6	6	2	6	2	1	1	-99	-99	Mozilla/5.0 (iPhone; CPU iPhone OS 14_4_2 like Mac OS X) AppleWebKit/605.1.15 (KHTML, like Gecko) Version/14.0.3 Mobile/15E148 Safari/604.1	-99
716	0	0	31	5822659	-77	948	-77	-77	-99	-99	d	2	5	26	2	2	1	0	0	0	0	-99	5	3	3	3	1	1	4	3	2	2	7	7	7	7	6	4	7	7	7	5	7	3	3	-99	-99	Mozilla/5.0 (Linux; Android 10; SAMSUNG SM-G965F) AppleWebKit/537.36 (KHTML, like Gecko) SamsungBrowser/13.2 Chrome/83.0.4103.106 Mobile Safari/537.36	-99
717	0	0	31	5822659	-77	580	-77	-77	-99	-99	d	2	2	32	1	2	0	1	0	0	0	-99	3	7	7	7	1	1	1	1	1	1	7	7	7	7	7	7	7	7	7	7	7	7	7	-99	-99	Mozilla/5.0 (Macintosh; Intel Mac OS X 10_15_6) AppleWebKit/605.1.15 (KHTML, like Gecko) Version/14.0.3 Safari/605.1.15	-99
721	0	0	31	5822659	-77	912	-77	-77	-99	-99	d	2	10	25	2	2	1	0	0	0	0	-99	6	6	5	5	5	1	6	3	2	2	7	7	6	5	3	5	5	7	6	4	7	4	3	-99	-99	Mozilla/5.0 (Linux; Android 11; Pixel 4a) AppleWebKit/537.36 (KHTML, like Gecko) Chrome/89.0.4389.105 Mobile Safari/537.36	android-app://com.google.android.gm/
722	0	0	31	5822659	-77	1090	-77	-77	-99	-99	d	5	2	20	2	2	1	0	0	0	0	-99	3	3	3	2	3	3	1	2	3	2	7	7	7	7	7	7	7	7	7	2	3	4	4	-99	-99	Mozilla/5.0 (iPhone; CPU iPhone OS 14_4_1 like Mac OS X) AppleWebKit/605.1.15 (KHTML, like Gecko) Version/14.0.3 Mobile/15E148 Safari/604.1	-99
723	0	0	31	5822659	-77	998	-77	-77	-99	-99	d	2	6	24	2	2	1	0	0	0	0	-99	5	4	2	4	3	1	5	5	1	1	7	7	7	5	7	5	5	7	7	1	4	4	4	-99	-99	Mozilla/5.0 (Linux; Android 9; ANE-LX1 Build/HUAWEIANE-L01) AppleWebKit/537.36 (KHTML, like Gecko) Chrome/69.0.3497.128 Mobile Safari/537.36 (Ecosia android@69.0.3497.128)	https://webmail.stud.uni-giessen.de/horde/imp/smartmobile.php
724	0	0	32	5822659	-77	-1	-77	-77	-99	-99	d	2	3	21	1	2	1	0	0	0	0	-99	4	4	3	4	0	0	0	0	0	0	0	0	0	0	0	0	0	0	0	0	0	0	0	-99	-99	Mozilla/5.0 (iPhone; CPU iPhone OS 14_4_1 like Mac OS X) AppleWebKit/605.1.15 (KHTML, like Gecko) Version/14.0.3 Mobile/15E148 Safari/604.1	-99
727	0	0	31	5812245	-77	8	-77	-77	-99	-99	d	4	-66	-66	-77	-77	-77	-77	-77	-77	-77	-66	-77	-77	-77	-77	-77	-77	-77	-77	-77	-77	-77	-77	-77	-77	-77	-77	-77	-77	-77	-77	-77	-77	-77	-66	-66	Mozilla/5.0 (X11; Ubuntu; Linux x86_64; rv:87.0) Gecko/20100101 Firefox/87.0	-99
728	0	0	31	5822659	-77	1243	-77	-77	-99	-99	d	2	9	30	1	2	1	0	0	0	0	-99	3	5	1	2	1	1	5	4	1	1	7	7	7	7	7	7	7	4	4	4	4	4	5	-99	-99	Mozilla/5.0 (Linux; Android 10) AppleWebKit/537.36 (KHTML, like Gecko) Chrome/88.0.4324.182 Mobile Safari/537.36	android-app://com.google.android.gm/
730	0	0	31	5822659	-77	2002	-77	-77	-99	-99	d	2	7	24	1	2	1	0	0	0	0	-99	5	5	4	4	3	3	4	4	4	4	0	0	0	0	0	0	0	0	0	0	0	0	0	-99	-99	Mozilla/5.0 (Windows NT 6.1; Win64; x64) AppleWebKit/537.36 (KHTML, like Gecko) Chrome/89.0.4389.90 Safari/537.36	https://webmail.stud.uni-giessen.de/
1112	0	0	31	5822659	-77	929	-77	-77	-99	-99	d	2	2	20	2	2	1	0	0	0	0	-99	6	6	5	4	2	2	2	2	2	2	7	5	3	5	5	1	5	5	2	5	4	1	2	-99	-99	Mozilla/5.0 (Macintosh; Intel Mac OS X 10_15_6) AppleWebKit/605.1.15 (KHTML, like Gecko) Version/14.0.3 Safari/605.1.15	-99
731	0	0	31	5822659	-77	1034	-77	-77	-99	-99	d	3	13	29	2	2	1	0	0	0	0	-99	5	4	3	3	2	2	4	1	2	3	7	6	7	6	7	6	6	7	4	6	5	2	2	-99	-99	Mozilla/5.0 (Linux; Android 11; Pixel 3a) AppleWebKit/537.36 (KHTML, like Gecko) SamsungBrowser/13.2 Chrome/83.0.4103.106 Mobile Safari/537.36	https://wm.hrz.uni-giessen.de/horde/imp/smartmobile.php
732	0	0	32	5822659	-77	-1	-77	-77	-99	-99	d	2	2	24	2	2	1	0	0	0	0	-99	1	7	5	7	1	1	1	1	1	1	7	6	6	5	5	5	5	7	1	7	0	0	0	-99	-99	Mozilla/5.0 (iPhone; CPU iPhone OS 14_4_1 like Mac OS X) AppleWebKit/605.1.15 (KHTML, like Gecko) Mobile/15E148 StudoBrowser/4.02.3-ios-studo (https://studo.com/studo-browser-information-and-contact)	-99
734	0	0	31	5822659	-77	957	-77	-77	-99	-99	d	2	2	19	2	2	1	0	0	0	0	-99	5	5	3	3	3	3	4	3	0	0	7	5	6	6	5	5	6	6	5	3	4	3	3	-99	-99	Mozilla/5.0 (Linux; Android 10; SM-J600FN) AppleWebKit/537.36 (KHTML, like Gecko) Chrome/88.0.4324.181 Mobile Safari/537.36 (Ecosia android@88.0.4324.181)	-99
733	0	0	31	5822659	-77	1456	-77	-77	-99	-99	d	2	8	24	2	2	1	0	0	0	0	-99	5	5	3	6	5	1	4	1	1	1	7	7	7	7	7	7	7	7	4	6	4	5	4	-99	-99	Mozilla/5.0 (Linux; Android 11; SAMSUNG SM-G970F) AppleWebKit/537.36 (KHTML, like Gecko) SamsungBrowser/13.2 Chrome/83.0.4103.106 Mobile Safari/537.36	-99
735	0	0	31	5822659	-77	1246	-77	-77	-99	-99	d	2	6	22	2	2	1	0	0	0	0	-99	2	2	1	1	1	1	1	4	1	1	5	5	5	5	2	3	4	5	5	3	5	5	4	-99	-99	Mozilla/5.0 (iPhone; CPU iPhone OS 14_4_1 like Mac OS X) AppleWebKit/605.1.15 (KHTML, like Gecko) Version/14.0.3 Mobile/15E148 Safari/604.1	https://wm.hrz.uni-giessen.de/horde/imp/smartmobile.php
738	0	0	31	5822659	-77	1694	-77	-77	-99	-99	d	2	1	19	1	2	1	0	0	0	0	-99	4	4	5	5	4	4	4	4	4	4	4	4	4	4	4	4	4	4	4	4	4	4	4	-99	-99	Mozilla/5.0 (Macintosh; Intel Mac OS X 10_15_6) AppleWebKit/605.1.15 (KHTML, like Gecko) Version/14.0.3 Safari/605.1.15	-99
737	0	0	31	5822659	-77	1057	-77	-77	-99	-99	d	2	10	29	2	2	1	0	0	0	0	-99	5	6	4	5	1	1	5	4	2	2	7	7	7	7	6	5	5	5	4	5	6	5	5	-99	-99	Mozilla/5.0 (Linux; Android 10; SM-G960F) AppleWebKit/537.36 (KHTML, like Gecko) Chrome/89.0.4389.105 Mobile Safari/537.36	-99
739	0	0	31	5812245	-77	22	-77	-77	-99	-99	d	1	-66	-66	-77	-77	-77	-77	-77	-77	-77	-66	-77	-77	-77	-77	-77	-77	-77	-77	-77	-77	-77	-77	-77	-77	-77	-77	-77	-77	-77	-77	-77	-77	-77	-66	-66	Mozilla/5.0 (Linux; Android 10; MAR-LX1A) AppleWebKit/537.36 (KHTML, like Gecko) Chrome/89.0.4389.105 Mobile Safari/537.36	-99
743	0	0	31	5822659	-77	1175	-77	-77	-99	-99	d	5	1	29	2	2	1	0	0	0	0	-99	7	7	7	7	1	1	1	1	1	1	1	1	1	1	1	1	1	1	1	1	1	1	1	-99	-99	Mozilla/5.0 (iPhone; CPU iPhone OS 14_4 like Mac OS X) AppleWebKit/605.1.15 (KHTML, like Gecko) Version/14.0.3 Mobile/15E148 Safari/604.1	-99
776	0	0	31	5812245	-77	31	-77	-77	-99	-99	d	1	-66	-66	-77	-77	-77	-77	-77	-77	-77	-66	-77	-77	-77	-77	-77	-77	-77	-77	-77	-77	-77	-77	-77	-77	-77	-77	-77	-77	-77	-77	-77	-77	-77	-66	-66	Mozilla/5.0 (Macintosh; Intel Mac OS X 10_15_7) AppleWebKit/605.1.15 (KHTML, like Gecko) Version/14.0 Safari/605.1.15	-99
744	0	0	31	5822659	-77	1892	-77	-77	-99	-99	d	2	4	24	2	2	1	0	0	0	0	-99	5	4	3	5	1	1	1	1	1	1	6	5	4	4	3	3	4	5	5	5	5	3	3	-99	-99	Mozilla/5.0 (iPhone; CPU iPhone OS 14_4_1 like Mac OS X) AppleWebKit/605.1.15 (KHTML, like Gecko) Version/14.0.3 Mobile/15E148 Safari/604.1	-99
745	0	0	31	5822659	-77	1402	-77	-77	-99	-99	d	2	3	23	2	2	1	0	0	0	0	-99	6	6	6	6	3	3	4	5	7	6	6	6	5	5	6	5	6	5	4	4	6	4	4	-99	-99	Mozilla/5.0 (Macintosh; Intel Mac OS X 10_15_6) AppleWebKit/605.1.15 (KHTML, like Gecko) Version/14.0.3 Safari/605.1.15	-99
746	0	0	31	5822659	-77	877	-77	-77	-99	-99	d	2	8	22	2	2	1	0	0	0	0	-99	5	5	3	5	1	1	3	2	2	2	7	7	7	7	6	7	7	6	6	3	5	5	6	-99	-99	Mozilla/5.0 (iPhone; CPU iPhone OS 14_4_2 like Mac OS X) AppleWebKit/605.1.15 (KHTML, like Gecko) Version/14.0.3 Mobile/15E148 Safari/604.1	-99
1137	0	0	31	5812245	-77	16	-77	-77	-99	-99	d	1	-66	-66	-77	-77	-77	-77	-77	-77	-77	-66	-77	-77	-77	-77	-77	-77	-77	-77	-77	-77	-77	-77	-77	-77	-77	-77	-77	-77	-77	-77	-77	-77	-77	-66	-66	Mozilla/5.0 (Macintosh; Intel Mac OS X 10_15_6) AppleWebKit/605.1.15 (KHTML, like Gecko) Version/14.0.3 Safari/605.1.15	-99
749	0	0	31	5822659	-77	972	-77	-77	-99	-99	d	2	3	26	1	2	0	1	0	0	0	-99	4	4	6	6	6	6	6	6	6	6	4	4	4	4	4	4	4	4	4	4	4	4	4	-99	-99	Mozilla/5.0 (Macintosh; Intel Mac OS X 10_15_6) AppleWebKit/605.1.15 (KHTML, like Gecko) Version/14.0.3 Safari/605.1.15	-99
751	0	0	32	5822659	-77	-1	-77	-77	-99	-99	d	2	8	22	2	2	1	0	0	0	0	-99	6	7	7	6	6	2	6	0	0	0	0	0	0	0	0	0	0	0	0	0	0	0	0	-99	-99	Mozilla/5.0 (Windows NT 10.0; Win64; x64; rv:87.0) Gecko/20100101 Firefox/87.0	-99
753	0	0	31	5822659	-77	1487	-77	-77	-99	-99	d	2	10	25	1	2	0	1	0	0	0	-99	2	6	5	6	1	1	5	2	1	1	7	7	7	7	7	7	7	7	7	7	7	7	7	-99	-99	Mozilla/5.0 (Windows NT 10.0; Win64; x64) AppleWebKit/537.36 (KHTML, like Gecko) Chrome/89.0.4389.90 Safari/537.36 Edg/89.0.774.63	https://webmail.stud.uni-giessen.de/
755	0	0	31	5822659	-77	1282	-77	-77	-99	-99	d	2	4	23	1	2	1	0	0	0	0	-99	6	6	5	6	4	5	5	4	4	3	7	6	6	6	6	6	6	6	5	4	6	5	5	-99	-99	Mozilla/5.0 (iPhone; CPU iPhone OS 14_4_2 like Mac OS X) AppleWebKit/605.1.15 (KHTML, like Gecko) Version/14.0.3 Mobile/15E148 Safari/604.1	-99
757	0	0	31	5822659	-77	1094	-77	-77	-99	-99	d	2	7	29	1	2	1	0	0	0	0	-99	6	6	6	5	2	1	5	2	2	2	6	6	6	6	6	5	6	6	6	2	4	5	5	-99	Leider fand ich die Fragen zu Nebenwirkungen nicht ganz passend, um meine Einstellung dazu deutlich zu machen. Hier hätte man zwischen Impfreaktionen (der zu erwartenden Immunantwort mit den entsprechenden Symptomen) und wirklichen Nebenwirkungen unterscheiden können. Erstere habe ich erwartet, hatte ich, sind unangenehm aber beeinflussen meine Entscheidung kaum bis gar nicht.	Mozilla/5.0 (Windows NT 10.0; Win64; x64; rv:87.0) Gecko/20100101 Firefox/87.0	https://webmail.stud.uni-giessen.de/
756	0	0	31	5822659	-77	842	-77	-77	-99	-99	d	2	5	21	1	2	0	1	0	0	0	-99	4	4	4	4	4	4	5	6	4	4	7	7	7	7	7	7	7	7	7	1	4	4	4	-99	-99	Mozilla/5.0 (iPhone; CPU iPhone OS 14_2 like Mac OS X) AppleWebKit/605.1.15 (KHTML, like Gecko) Version/14.0.1 Mobile/15E148 Safari/604.1	-99
763	0	0	31	5822659	-77	956	-77	-77	-99	-99	d	2	4	31	1	2	1	0	0	0	0	-99	5	5	5	5	2	4	3	5	5	5	7	7	7	6	6	6	6	5	4	4	4	4	5	-99	-99	Mozilla/5.0 (Windows NT 10.0; Win64; x64; rv:87.0) Gecko/20100101 Firefox/87.0	-99
758	0	0	31	5822659	-77	750	-77	-77	-99	-99	d	2	2	27	2	2	0	1	0	0	0	-99	7	7	5	5	1	1	1	1	1	1	7	7	7	7	7	7	7	7	7	7	7	4	4	-99	-99	Mozilla/5.0 (iPhone; CPU iPhone OS 14_4_2 like Mac OS X) AppleWebKit/605.1.15 (KHTML, like Gecko) Version/14.0.3 Mobile/15E148 Safari/604.1	https://wm.hrz.uni-giessen.de/horde/imp/smartmobile.php
759	0	0	31	5822659	-77	2135	-77	-77	-99	-99	d	2	4	28	1	2	1	0	0	0	0	-99	5	6	5	4	1	1	1	1	1	1	5	5	5	6	5	5	6	4	3	5	4	4	4	-99	-99	Mozilla/5.0 (Windows NT 10.0; Win64; x64; rv:87.0) Gecko/20100101 Firefox/87.0	-99
761	0	0	31	5822659	-77	1208	-77	-77	-99	-99	d	2	7	23	2	2	1	0	0	0	0	-99	7	6	6	6	3	2	2	2	1	1	7	7	7	6	6	6	6	6	3	6	5	5	5	-99	-99	Mozilla/5.0 (Macintosh; Intel Mac OS X 10_15_6) AppleWebKit/605.1.15 (KHTML, like Gecko) Version/14.0.3 Safari/605.1.15	https://wm.hrz.uni-giessen.de/horde/imp/dynamic.php?page=mailbox
764	0	0	31	5812245	-77	20	-77	-77	-99	-99	d	1	-66	-66	-77	-77	-77	-77	-77	-77	-77	-66	-77	-77	-77	-77	-77	-77	-77	-77	-77	-77	-77	-77	-77	-77	-77	-77	-77	-77	-77	-77	-77	-77	-77	-66	-66	Mozilla/5.0 (Macintosh; Intel Mac OS X 10_15_6) AppleWebKit/605.1.15 (KHTML, like Gecko) Version/14.0.3 Safari/605.1.15	-99
769	0	0	31	5812245	-77	25	-77	-77	-99	-99	d	1	-66	-66	-77	-77	-77	-77	-77	-77	-77	-66	-77	-77	-77	-77	-77	-77	-77	-77	-77	-77	-77	-77	-77	-77	-77	-77	-77	-77	-77	-77	-77	-77	-77	-66	-66	Mozilla/5.0 (Macintosh; Intel Mac OS X 10_15_6) AppleWebKit/605.1.15 (KHTML, like Gecko) Version/14.0.3 Safari/605.1.15	-99
765	0	0	32	5822659	-77	-1	-77	-77	-99	-99	d	2	3	26	2	2	0	1	0	1	0	-99	7	7	7	7	1	1	1	1	1	1	7	7	7	7	7	5	7	7	6	2	4	3	3	-99	-99	Mozilla/5.0 (iPhone; CPU iPhone OS 14_4_2 like Mac OS X) AppleWebKit/605.1.15 (KHTML, like Gecko) Version/14.0.3 Mobile/15E148 Safari/604.1	-99
766	0	0	31	5822659	-77	870	-77	-77	-99	-99	d	2	10	24	2	2	1	0	0	0	0	-99	5	6	7	6	1	1	3	1	1	1	7	7	7	6	7	5	5	7	4	6	4	4	4	-99	Ich bin schon geimpft, einige Fragen haben deshalb für mich keinen Sinn ergeben	Mozilla/5.0 (Macintosh; Intel Mac OS X 10_15_7) AppleWebKit/605.1.15 (KHTML, like Gecko) Version/14.0.2 Safari/605.1.15	-99
767	0	0	31	5822659	-77	1014	-77	-77	-99	-99	d	2	4	20	2	2	1	0	0	0	0	-99	3	3	2	3	1	1	1	1	1	1	6	6	6	6	6	6	6	6	6	6	6	6	6	-99	-99	Mozilla/5.0 (Macintosh; Intel Mac OS X 10_15_6) AppleWebKit/605.1.15 (KHTML, like Gecko) Version/14.0.3 Safari/605.1.15	-99
771	0	0	31	5822659	-77	1323	-77	-77	-99	-99	d	2	7	23	2	2	1	0	0	0	0	-99	3	4	1	1	2	2	2	2	2	2	5	6	6	4	3	6	3	3	5	3	6	1	2	-99	-99	Mozilla/5.0 (Linux; Android 10; SNE-LX1) AppleWebKit/537.36 (KHTML, like Gecko) Chrome/89.0.4389.105 Mobile Safari/537.36	https://wm.hrz.uni-giessen.de/
772	0	0	31	5822659	-77	1439	-77	-77	-99	-99	d	3	12	27	2	2	1	0	0	0	0	-99	5	6	5	4	3	2	5	5	2	3	7	5	5	5	3	5	5	5	4	4	6	2	2	-99	-99	Mozilla/5.0 (iPhone; CPU iPhone OS 14_4_2 like Mac OS X) AppleWebKit/605.1.15 (KHTML, like Gecko) Version/14.0.3 Mobile/15E148 Safari/604.1	-99
773	0	0	31	5822659	-77	1066	-77	-77	-99	-99	d	2	5	29	2	2	1	0	0	0	0	-99	7	5	4	3	2	2	2	1	2	2	6	6	6	5	4	4	5	5	3	4	6	2	2	-99	-99	Mozilla/5.0 (iPhone; CPU iPhone OS 14_4_1 like Mac OS X) AppleWebKit/605.1.15 (KHTML, like Gecko) Version/14.0.3 Mobile/15E148 Safari/604.1	-99
775	0	0	31	5822659	-77	1058	-77	-77	-99	-99	d	2	4	30	1	2	0	1	0	0	0	-99	5	5	5	5	1	1	1	1	1	1	7	7	7	7	6	5	7	4	2	5	4	2	2	-99	-99	Mozilla/5.0 (Macintosh; Intel Mac OS X 10_15_6) AppleWebKit/605.1.15 (KHTML, like Gecko) Version/14.0.3 Safari/605.1.15	-99
777	0	0	31	5822659	-77	1680	-77	-77	-99	-99	d	2	9	22	2	2	1	1	0	0	0	-99	6	6	5	6	3	3	6	4	2	3	6	5	5	5	4	4	5	5	4	4	4	4	4	-99	-99	Mozilla/5.0 (Linux; Android 10; COL-L29) AppleWebKit/537.36 (KHTML, like Gecko) Chrome/89.0.4389.105 Mobile Safari/537.36	-99
785	0	0	31	5822659	-77	1055	-77	-77	-99	-99	d	2	5	25	2	2	1	0	0	0	0	-99	4	4	1	1	2	2	4	2	1	1	7	7	7	4	5	4	7	4	1	7	4	1	1	-99	-99	Mozilla/5.0 (Linux; Android 10; RMX2001) AppleWebKit/537.36 (KHTML, like Gecko) Chrome/89.0.4389.105 Mobile Safari/537.36	android-app://com.google.android.gm/
781	0	0	31	5822659	-77	1226	-77	-77	-99	-99	d	2	13	25	2	2	1	0	0	0	0	-99	3	3	4	2	1	1	7	6	2	2	7	7	5	5	5	5	5	5	4	4	4	6	3	-99	-99	Mozilla/5.0 (Windows NT 10.0; Win64; x64; rv:82.0) Gecko/20100101 Firefox/82.0	-99
780	0	0	31	5822659	-77	1459	-77	-77	-99	-99	d	2	10	24	2	1	1	0	0	0	0	-99	5	7	7	6	2	1	2	2	2	1	7	7	7	7	5	5	6	6	6	5	7	4	4	-99	-99	Mozilla/5.0 (iPhone; CPU iPhone OS 14_4_2 like Mac OS X) AppleWebKit/605.1.15 (KHTML, like Gecko) Version/14.0.3 Mobile/15E148 Safari/604.1	-99
782	0	0	31	5822659	-77	778	-77	-77	-99	-99	d	2	5	29	2	2	1	0	0	0	0	-99	7	7	4	6	1	1	2	2	1	1	7	7	7	7	5	3	7	7	5	5	5	5	3	-99	-99	Mozilla/5.0 (Macintosh; Intel Mac OS X 10_15_6) AppleWebKit/605.1.15 (KHTML, like Gecko) Version/14.0.3 Safari/605.1.15	-99
786	0	0	31	5822659	-77	976	-77	-77	-99	-99	d	2	4	21	2	2	0	1	0	0	0	-99	6	6	4	5	6	6	4	2	2	2	5	5	6	4	5	5	6	5	5	5	4	4	4	-99	-99	Mozilla/5.0 (Windows NT 10.0; Win64; x64; rv:86.0) Gecko/20100101 Firefox/86.0	https://student.uniklinikum-leipzig.de/studium/allgemeines_interessantes.php
787	0	0	31	5812245	-77	18	-77	-77	-99	-99	d	1	-66	-66	-77	-77	-77	-77	-77	-77	-77	-66	-77	-77	-77	-77	-77	-77	-77	-77	-77	-77	-77	-77	-77	-77	-77	-77	-77	-77	-77	-77	-77	-77	-77	-66	-66	Mozilla/5.0 (Macintosh; Intel Mac OS X 10.15; rv:85.0) Gecko/20100101 Firefox/85.0	-99
788	0	0	31	5822659	-77	1029	-77	-77	-99	-99	d	2	6	23	2	2	1	0	0	0	0	-99	7	7	6	6	2	1	2	1	1	1	7	7	7	7	7	6	7	7	5	7	4	4	4	-99	-99	Mozilla/5.0 (iPhone; CPU iPhone OS 14_4_2 like Mac OS X) AppleWebKit/605.1.15 (KHTML, like Gecko) Version/14.0.3 Mobile/15E148 Safari/604.1	https://wm.hrz.uni-giessen.de/horde/imp/smartmobile.php
790	0	0	31	5812245	-77	15	-77	-77	-99	-99	d	1	-66	-66	-77	-77	-77	-77	-77	-77	-77	-66	-77	-77	-77	-77	-77	-77	-77	-77	-77	-77	-77	-77	-77	-77	-77	-77	-77	-77	-77	-77	-77	-77	-77	-66	-66	Mozilla/5.0 (iPhone; CPU iPhone OS 14_4_2 like Mac OS X) AppleWebKit/605.1.15 (KHTML, like Gecko) Version/14.0.3 Mobile/15E148 Safari/604.1	-99
792	0	0	31	5822659	-77	1146	-77	-77	-99	-99	d	2	4	27	2	2	1	0	0	0	0	-99	2	2	1	1	2	2	2	1	2	1	7	5	7	6	7	0	6	7	6	2	5	1	1	-99	-99	Mozilla/5.0 (Linux; Android 8.0.0; WAS-LX1A) AppleWebKit/537.36 (KHTML, like Gecko) Chrome/89.0.4389.105 Mobile Safari/537.36	android-app://com.google.android.gm/
791	0	0	31	5822659	-77	1548	-77	-77	-99	-99	d	2	7	23	1	2	0	1	0	0	0	-99	6	7	5	5	5	1	7	4	2	1	7	6	7	6	4	4	6	5	4	4	4	2	2	-99	-99	Mozilla/5.0 (Windows NT 10.0; Win64; x64) AppleWebKit/537.36 (KHTML, like Gecko) Chrome/89.0.4389.90 Safari/537.36	https://wm.hrz.uni-giessen.de/
794	0	0	31	5822659	-77	1338	-77	-77	-99	-99	d	2	3	20	2	2	1	0	0	0	0	-99	5	5	5	3	2	1	1	1	1	2	7	6	7	6	7	7	7	7	7	7	7	4	5	-99	-99	Mozilla/5.0 (iPhone; CPU iPhone OS 14_4 like Mac OS X) AppleWebKit/605.1.15 (KHTML, like Gecko) Mobile/15E148 StudoBrowser/4.02.3-ios-studo (https://studo.com/studo-browser-information-and-contact)	-99
793	0	0	31	5812245	-77	12	-77	-77	-99	-99	d	1	-66	-66	-77	-77	-77	-77	-77	-77	-77	-66	-77	-77	-77	-77	-77	-77	-77	-77	-77	-77	-77	-77	-77	-77	-77	-77	-77	-77	-77	-77	-77	-77	-77	-66	-66	Mozilla/5.0 (iPhone; CPU iPhone OS 14_4_2 like Mac OS X) AppleWebKit/605.1.15 (KHTML, like Gecko) Version/14.0.3 Mobile/15E148 Safari/604.1	-99
796	0	0	31	5822659	-77	2054	-77	-77	-99	-99	d	2	3	21	1	2	0	1	0	0	0	-99	7	6	6	6	1	1	1	1	1	1	7	6	7	7	7	4	7	7	4	4	4	5	5	-99	-99	Mozilla/5.0 (iPhone; CPU iPhone OS 14_4_1 like Mac OS X) AppleWebKit/605.1.15 (KHTML, like Gecko) Version/14.0.3 Mobile/15E148 Safari/604.1	-99
797	0	0	31	5812245	-77	8	-77	-77	-99	-99	d	4	-66	-66	-77	-77	-77	-77	-77	-77	-77	-66	-77	-77	-77	-77	-77	-77	-77	-77	-77	-77	-77	-77	-77	-77	-77	-77	-77	-77	-77	-77	-77	-77	-77	-66	-66	Mozilla/5.0 (iPhone; CPU iPhone OS 14_4_2 like Mac OS X) AppleWebKit/605.1.15 (KHTML, like Gecko) Version/14.0.3 Mobile/15E148 Safari/604.1	-99
798	0	0	31	5822659	-77	1248	-77	-77	-99	-99	d	2	8	24	1	2	1	0	0	0	0	-99	3	5	5	5	5	3	6	6	2	3	7	5	5	5	4	6	5	6	6	3	5	4	5	-99	-99	Mozilla/5.0 (Linux; Android 6.0; ALE-L21) AppleWebKit/537.36 (KHTML, like Gecko) Chrome/89.0.4389.105 Mobile Safari/537.36	-99
799	0	0	31	5822659	-77	751	-77	-77	-99	-99	d	2	10	23	2	2	0	1	0	0	0	-99	7	7	4	5	1	1	3	3	2	2	5	5	5	5	5	5	6	7	6	5	4	4	4	-99	-99	Mozilla/5.0 (iPhone; CPU iPhone OS 14_4_2 like Mac OS X) AppleWebKit/605.1.15 (KHTML, like Gecko) Version/14.0.3 Mobile/15E148 Safari/604.1	-99
800	0	0	31	5822659	-77	1188	-77	-77	-99	-99	d	2	5	27	2	2	1	0	0	0	0	-99	6	4	2	2	1	1	6	6	4	1	7	7	7	7	7	7	7	7	5	5	7	5	5	-99	-99	Mozilla/5.0 (Android 10; Mobile; rv:87.0) Gecko/87.0 Firefox/87.0	-99
801	0	0	31	5822659	-77	3213	-77	-77	-99	-99	d	2	9	49	1	2	1	0	0	0	0	-99	2	3	2	2	1	1	4	4	1	1	7	5	2	1	1	1	1	3	3	1	2	1	1	Wie eigentlich in allen Fächern: Dozenten sollen vernünftigen Unterricht gestalten anstelle mit ihrem eignen Wissen zu prahlen. Albereien wie Patientenschauspieler und Rollenspiel sind unnütz.	-99	Mozilla/5.0 (Windows NT 10.0; WOW64; Trident/7.0; rv:11.0) like Gecko	-99
804	0	0	31	5822659	-77	874	-77	-77	-99	-99	d	3	11	32	2	2	0	1	0	0	0	-99	6	6	6	6	2	2	5	5	2	2	7	7	7	7	7	7	7	7	7	7	7	5	5	-99	-99	Mozilla/5.0 (iPhone; CPU iPhone OS 14_4_1 like Mac OS X) AppleWebKit/605.1.15 (KHTML, like Gecko) Version/14.0.3 Mobile/15E148 Safari/604.1	-99
802	0	0	31	5822659	-77	813	-77	-77	-99	-99	d	2	5	23	2	2	1	0	0	0	0	-99	5	5	1	1	1	1	1	1	1	1	7	7	7	7	6	6	6	7	7	4	7	5	5	-99	-99	Mozilla/5.0 (iPhone; CPU iPhone OS 14_4_1 like Mac OS X) AppleWebKit/605.1.15 (KHTML, like Gecko) Version/14.0.3 Mobile/15E148 Safari/604.1	-99
866	0	0	31	5822659	-77	1213	-77	-77	-99	-99	d	2	5	22	2	2	1	0	0	0	0	-99	6	7	6	6	3	1	5	2	1	1	5	5	6	7	5	3	5	5	2	5	6	1	1	-99	-99	Mozilla/5.0 (Windows NT 10.0; Win64; x64; rv:86.0) Gecko/20100101 Firefox/86.0	https://wm.hrz.uni-giessen.de/horde/imp/dynamic.php?page=mailbox
805	0	0	31	5822659	-77	1118	-77	-77	-99	-99	d	2	2	20	2	2	1	0	0	0	0	-99	5	3	2	4	2	1	3	1	1	1	6	6	5	6	6	6	6	4	7	4	4	4	4	-99	-99	Mozilla/5.0 (iPhone; CPU iPhone OS 14_4_1 like Mac OS X) AppleWebKit/605.1.15 (KHTML, like Gecko) Version/14.0.3 Mobile/15E148 Safari/604.1	-99
807	0	0	31	5822659	-77	822	-77	-77	-99	-99	d	5	9	24	1	2	1	0	0	0	0	-99	5	6	6	5	0	0	0	0	0	0	0	0	0	0	0	0	0	0	0	0	0	0	0	-99	-99	Mozilla/5.0 (iPhone; CPU iPhone OS 14_4_1 like Mac OS X) AppleWebKit/605.1.15 (KHTML, like Gecko) Version/14.0.3 Mobile/15E148 Safari/604.1	-99
808	0	0	31	5822659	-77	1269	-77	-77	-99	-99	d	3	12	25	2	2	1	0	0	0	0	-99	6	5	5	4	5	6	6	5	2	2	7	5	6	7	4	2	7	6	7	3	5	4	2	-99	-99	Mozilla/5.0 (iPhone; CPU iPhone OS 14_4_2 like Mac OS X) AppleWebKit/605.1.15 (KHTML, like Gecko) Version/14.0.3 Mobile/15E148 Safari/604.1	-99
809	0	0	31	5812245	-77	5	-77	-77	-99	-99	d	1	-66	-66	-77	-77	-77	-77	-77	-77	-77	-66	-77	-77	-77	-77	-77	-77	-77	-77	-77	-77	-77	-77	-77	-77	-77	-77	-77	-77	-77	-77	-77	-77	-77	-66	-66	Mozilla/5.0 (iPhone; CPU iPhone OS 14_4_2 like Mac OS X) AppleWebKit/605.1.15 (KHTML, like Gecko) Version/14.0.3 Mobile/15E148 Safari/604.1	-99
811	0	0	31	5822659	-77	1324	-77	-77	-99	-99	d	2	6	22	2	2	0	1	0	0	0	-99	2	2	1	1	3	2	4	3	3	3	6	6	5	4	1	5	4	4	4	4	4	4	4	-99	-99	Mozilla/5.0 (Windows NT 10.0; Win64; x64; rv:87.0) Gecko/20100101 Firefox/87.0	https://student.uniklinikum-leipzig.de/
812	0	0	31	5822659	-77	2226	-77	-77	-99	-99	d	5	9	25	2	2	1	0	0	0	0	-99	5	6	5	3	1	1	4	3	2	1	6	5	5	7	4	4	6	4	4	5	5	3	4	-99	-99	Mozilla/5.0 (iPhone; CPU iPhone OS 14_4_1 like Mac OS X) AppleWebKit/605.1.15 (KHTML, like Gecko) Version/14.0.3 Mobile/15E148 Safari/604.1	-99
814	0	0	32	5822659	-77	-1	-77	-77	-99	-99	d	2	7	24	2	2	0	1	0	0	0	-99	2	1	2	2	3	1	3	1	1	1	6	7	6	6	2	3	3	6	7	3	3	3	4	-99	-99	Mozilla/5.0 (Linux; Android 10; SAMSUNG SM-G960F/G960FXXSFFUB3) AppleWebKit/537.36 (KHTML, like Gecko) SamsungBrowser/13.2 Chrome/83.0.4103.106 Mobile Safari/537.36	-99
813	0	0	31	5822659	-77	700	-77	-77	-99	-99	d	2	10	27	2	1	1	0	0	0	0	-99	7	7	7	7	1	1	2	3	1	1	7	7	7	7	7	7	7	7	7	7	7	7	7	-99	-99	Mozilla/5.0 (iPhone; CPU iPhone OS 14_4_1 like Mac OS X) AppleWebKit/605.1.15 (KHTML, like Gecko) Version/14.0.3 Mobile/15E148 Safari/604.1	-99
816	0	0	32	5822659	-77	-1	-77	-77	-99	-99	d	3	14	26	1	2	1	1	0	0	0	-99	7	7	6	6	2	2	2	2	2	1	7	7	7	7	6	6	6	6	6	7	7	4	4	-99	-99	Mozilla/5.0 (Linux; Android 11; SM-G973F) AppleWebKit/537.36 (KHTML, like Gecko) Chrome/89.0.4389.72 Mobile Safari/537.36	-99
823	0	0	31	5822659	-77	1402	-77	-77	-99	-99	d	2	4	22	2	2	1	0	0	0	0	-99	5	5	2	5	0	0	0	0	0	0	0	0	0	0	0	0	0	0	0	0	0	0	0	-99	-99	Mozilla/5.0 (Macintosh; Intel Mac OS X 10_13_6) AppleWebKit/605.1.15 (KHTML, like Gecko) Version/13.1.2 Safari/605.1.15	https://wm.hrz.uni-giessen.de/horde/imp/dynamic.php?page=mailbox
822	0	0	31	5822659	-77	1140	-77	-77	-99	-99	d	3	13	28	2	2	1	0	0	0	0	-99	6	6	4	4	2	1	2	1	1	1	5	5	5	5	5	4	5	5	5	5	5	3	3	-99	-99	Mozilla/5.0 (Windows NT 10.0; Win64; x64) AppleWebKit/537.36 (KHTML, like Gecko) Chrome/89.0.4389.90 Safari/537.36 Edg/89.0.774.63	-99
824	0	0	31	5812245	-77	13	-77	-77	-99	-99	d	1	-66	-66	-77	-77	-77	-77	-77	-77	-77	-66	-77	-77	-77	-77	-77	-77	-77	-77	-77	-77	-77	-77	-77	-77	-77	-77	-77	-77	-77	-77	-77	-77	-77	-66	-66	Mozilla/5.0 (Macintosh; Intel Mac OS X 10_15_6) AppleWebKit/605.1.15 (KHTML, like Gecko) Version/14.0.3 Safari/605.1.15	https://wm.hrz.uni-giessen.de/horde/imp/dynamic.php?page=mailbox
826	0	0	31	5822659	-77	1340	-77	-77	-99	-99	d	2	6	22	2	1	1	1	0	0	0	-99	6	7	7	5	2	1	3	1	2	1	6	6	7	5	7	6	6	7	7	5	4	5	5	-99	-99	Mozilla/5.0 (Macintosh; Intel Mac OS X 10_15_6) AppleWebKit/605.1.15 (KHTML, like Gecko) Version/14.0.3 Safari/605.1.15	-99
827	0	0	32	5822659	-77	-1	-77	-77	-99	-99	d	2	4	24	1	2	1	0	0	0	0	-99	6	6	6	6	4	4	4	4	4	4	7	5	6	5	4	3	4	6	6	3	5	4	4	-99	-99	Mozilla/5.0 (Windows NT 10.0; Win64; x64) AppleWebKit/537.36 (KHTML, like Gecko) Chrome/89.0.4389.90 Safari/537.36	-99
1064	0	0	31	5822659	-77	1093	-77	-77	-99	-99	d	5	4	20	2	2	1	0	0	0	0	-99	4	4	3	4	0	0	0	0	0	0	7	6	4	5	0	0	0	0	0	0	0	0	0	-99	-99	Mozilla/5.0 (iPhone; CPU iPhone OS 14_4_2 like Mac OS X) AppleWebKit/605.1.15 (KHTML, like Gecko) Version/14.0.3 Mobile/15E148 Safari/604.1	-99
829	0	0	31	5822659	-77	1332	-77	-77	-99	-99	d	2	2	26	2	2	1	0	0	0	0	-99	7	7	7	7	1	1	1	1	1	1	7	5	7	7	7	4	7	7	4	4	4	4	4	Impfen/Impfaufklärung ist im zweiten Semester der Vorklinik noch kein Unterrichtsinhalt. Bisher wurde nur (wenn überhaupt) die persönliche Meinung der Dozenten zum Thema Impfen vermittelt	Ich habe im Februar die erste Impfdosis des AstraZeneca. Sämmtliche Versunsicherungen bezüglich der Impfung berughen nur daruaf, dass ich wegen der neusten Entwicklungen nicht weiß, ob ich die zweite Dosis im April erhalten werde oder nicht. Und falls ich sie nicht erhalten werde, ob ich und meine Kollegen dann mit einem anderen Impfstoff geimpft werden. Ich gehöre aufgrund meiner Tätigkeit in de…	Mozilla/5.0 (Windows NT 10.0; Win64; x64; rv:87.0) Gecko/20100101 Firefox/87.0	-99
830	0	0	31	5822659	-77	1388	-77	-77	-99	-99	d	2	2	20	2	2	0	1	0	0	0	-99	7	7	7	7	7	7	7	4	7	4	7	7	7	7	7	7	7	7	4	7	7	4	4	-99	-99	Mozilla/5.0 (Windows NT 10.0; Win64; x64) AppleWebKit/537.36 (KHTML, like Gecko) Chrome/89.0.4389.90 Safari/537.36	https://student.uniklinikum-leipzig.de/
833	0	0	31	5822659	-77	1442	-77	-77	-99	-99	d	2	8	24	1	2	1	0	0	0	0	-99	3	5	3	3	2	1	4	2	2	2	5	5	6	4	1	1	5	5	4	5	3	3	3	-99	-99	Mozilla/5.0 (Linux; Android 10; ELE-L29) AppleWebKit/537.36 (KHTML, like Gecko) Chrome/89.0.4389.105 Mobile Safari/537.36	-99
832	0	0	31	5822659	-77	795	-77	-77	-99	-99	d	2	10	27	2	2	1	0	0	0	0	-99	4	4	4	5	1	1	7	7	6	2	7	7	5	4	4	4	4	4	4	4	4	1	1	-99	-99	Mozilla/5.0 (Windows NT 10.0; Win64; x64; rv:86.0) Gecko/20100101 Firefox/86.0	-99
831	0	0	31	5822659	-77	513	-77	-77	-99	-99	d	2	4	26	1	2	1	1	0	0	0	-99	7	7	7	7	1	1	1	1	1	3	7	7	7	7	7	7	7	7	7	7	7	7	7	-99	-99	Mozilla/5.0 (Macintosh; Intel Mac OS X 10_15_6) AppleWebKit/605.1.15 (KHTML, like Gecko) Version/14.0.3 Safari/605.1.15	-99
835	0	0	32	5822659	-77	-1	-77	-77	-99	-99	d	2	10	24	2	2	1	0	0	0	0	-99	6	7	4	5	2	5	7	6	4	5	6	7	6	6	6	6	4	4	1	6	7	4	4	-99	-99	Mozilla/5.0 (iPhone; CPU iPhone OS 14_4_2 like Mac OS X) AppleWebKit/605.1.15 (KHTML, like Gecko) Mobile/15E148 Version/13.1 (Ecosia ios@4.1.10.875) Safari/604.1	-99
836	0	0	31	5822659	-77	1299	-77	-77	-99	-99	d	2	4	21	2	2	1	0	0	0	0	-99	7	7	5	3	2	2	1	1	1	1	7	7	5	2	5	4	4	6	7	3	5	4	6	Es sollte mehr über die Nebenwirkungen von Impfungen aufgeklärt werden, damit man sich eine bessere Meinung bilden kann und Impfgegner besser verstehen kann.	-99	Mozilla/5.0 (Windows NT 10.0; Win64; x64; rv:87.0) Gecko/20100101 Firefox/87.0	https://student.uniklinikum-leipzig.de/
838	0	0	31	5822659	-77	4295	-77	-77	-99	-99	d	2	3	25	2	2	1	0	0	0	0	-99	5	5	5	5	2	3	3	2	1	1	7	6	6	7	4	2	5	6	5	5	4	4	3	-99	-99	Mozilla/5.0 (Linux; Android 10; SAMSUNG SM-A600FN/A600FNXXS7CTI1) AppleWebKit/537.36 (KHTML, like Gecko) SamsungBrowser/13.2 Chrome/83.0.4103.106 Mobile Safari/537.36	-99
839	0	0	31	5822659	-77	788	-77	-77	-99	-99	d	2	9	26	2	2	1	0	0	0	0	-99	6	6	4	5	1	1	1	3	3	2	7	7	7	7	7	7	7	7	7	7	7	7	7	-99	-99	Mozilla/5.0 (iPhone; CPU iPhone OS 14_4_2 like Mac OS X) AppleWebKit/605.1.15 (KHTML, like Gecko) Version/14.0.3 Mobile/15E148 Safari/604.1	-99
840	0	0	31	5822659	-77	1445	-77	-77	-99	-99	d	5	9	55	2	2	1	0	0	0	0	-99	5	4	3	2	3	2	4	5	5	5	6	5	5	5	5	6	5	5	6	5	5	5	5	-99	-99	Mozilla/5.0 (iPhone; CPU iPhone OS 14_4_2 like Mac OS X) AppleWebKit/605.1.15 (KHTML, like Gecko) Version/14.0.3 Mobile/15E148 Safari/604.1	-99
841	0	0	31	5812245	-77	13	-77	-77	-99	-99	d	1	-66	-66	-77	-77	-77	-77	-77	-77	-77	-66	-77	-77	-77	-77	-77	-77	-77	-77	-77	-77	-77	-77	-77	-77	-77	-77	-77	-77	-77	-77	-77	-77	-77	-66	-66	Mozilla/5.0 (iPhone; CPU iPhone OS 14_4_2 like Mac OS X) AppleWebKit/605.1.15 (KHTML, like Gecko) Version/14.0.3 Mobile/15E148 Safari/604.1	-99
842	0	0	31	5822659	-77	1265	-77	-77	-99	-99	d	2	9	26	2	2	1	0	0	0	0	-99	5	6	5	2	1	1	5	5	4	2	7	7	2	6	1	1	2	2	1	6	1	1	1	-99	-99	Mozilla/5.0 (iPhone; CPU iPhone OS 14_4_2 like Mac OS X) AppleWebKit/605.1.15 (KHTML, like Gecko) Version/14.0.3 Mobile/15E148 Safari/604.1	-99
844	0	0	31	5822659	-77	1003	-77	-77	-99	-99	d	2	9	28	2	2	0	1	0	0	0	-99	5	6	4	6	2	2	2	2	2	2	5	5	4	4	5	5	5	5	5	5	7	5	4	-99	-99	Mozilla/5.0 (Linux; Android 8.0.0; PIC-LX9) AppleWebKit/537.36 (KHTML, like Gecko) Chrome/89.0.4389.105 Mobile Safari/537.36	https://webmail.stud.uni-giessen.de/
845	0	0	31	5812245	-77	24	-77	-77	-99	-99	d	1	-66	-66	-77	-77	-77	-77	-77	-77	-77	-66	-77	-77	-77	-77	-77	-77	-77	-77	-77	-77	-77	-77	-77	-77	-77	-77	-77	-77	-77	-77	-77	-77	-77	-66	-66	Mozilla/5.0 (Macintosh; Intel Mac OS X 10_15_6) AppleWebKit/605.1.15 (KHTML, like Gecko) Version/14.0.3 Safari/605.1.15	-99
846	0	0	31	5822659	-77	2502	-77	-77	-99	-99	d	2	3	21	2	2	0	1	0	0	0	-99	5	0	4	3	1	1	1	1	1	1	5	5	5	5	5	4	6	6	4	5	6	3	5	-99	-99	Mozilla/5.0 (Windows NT 10.0; Win64; x64; rv:87.0) Gecko/20100101 Firefox/87.0	https://wm.hrz.uni-giessen.de/
847	0	0	31	5812245	-77	13	-77	-77	-99	-99	d	1	-66	-66	-77	-77	-77	-77	-77	-77	-77	-66	-77	-77	-77	-77	-77	-77	-77	-77	-77	-77	-77	-77	-77	-77	-77	-77	-77	-77	-77	-77	-77	-77	-77	-66	-66	Mozilla/5.0 (iPhone; CPU iPhone OS 14_4_2 like Mac OS X) AppleWebKit/605.1.15 (KHTML, like Gecko) Version/14.0.3 Mobile/15E148 Safari/604.1	-99
848	0	0	31	5822659	-77	1570	-77	-77	-99	-99	d	2	8	24	2	2	1	0	0	0	0	-99	2	5	4	2	1	1	6	4	4	2	5	4	4	5	4	2	5	6	6	2	4	2	2	-99	-99	Mozilla/5.0 (Linux; Android 11; SM-G781B) AppleWebKit/537.36 (KHTML, like Gecko) Chrome/89.0.4389.105 Mobile Safari/537.36	-99
854	0	0	31	5822659	-77	2506	-77	-77	-99	-99	d	2	10	25	2	2	1	0	0	0	0	-99	4	3	2	2	1	1	4	3	2	1	6	6	7	7	6	4	7	6	6	4	7	3	4	-99	-99	Mozilla/5.0 (iPhone; CPU iPhone OS 13_5_1 like Mac OS X) AppleWebKit/605.1.15 (KHTML, like Gecko) Version/13.1.1 Mobile/15E148 Safari/604.1	-99
851	0	0	32	5822659	-77	-1	-77	-77	-99	-99	d	3	15	27	2	2	1	0	0	0	0	-99	5	5	4	5	3	3	6	4	6	2	2	4	5	5	4	2	3	4	5	3	4	2	1	-99	-99	Mozilla/5.0 (iPhone; CPU iPhone OS 14_4_2 like Mac OS X) AppleWebKit/605.1.15 (KHTML, like Gecko) Version/14.0.3 Mobile/15E148 Safari/604.1	-99
853	0	0	31	5822659	-77	1303	-77	-77	-99	-99	d	2	3	20	1	2	1	0	0	0	0	-99	4	5	0	3	2	2	2	2	5	2	5	5	5	5	4	4	5	4	4	4	4	4	4	-99	-99	Mozilla/5.0 (Linux; Android 11; SAMSUNG SM-T860) AppleWebKit/537.36 (KHTML, like Gecko) SamsungBrowser/13.2 Chrome/83.0.4103.106 Safari/537.36	-99
856	0	0	31	5822659	-77	774	-77	-77	-99	-99	d	2	7	24	2	2	1	0	0	0	0	-99	3	1	1	3	1	1	4	1	1	1	6	5	7	5	7	3	6	7	4	2	6	1	1	-99	-99	Mozilla/5.0 (Macintosh; Intel Mac OS X 10_15_5) AppleWebKit/605.1.15 (KHTML, like Gecko) Version/13.1.1 Safari/605.1.15	-99
857	0	0	31	5822659	-77	915	-77	-77	-99	-99	d	2	8	31	1	3	1	0	0	0	0	-99	5	6	4	5	2	2	3	4	4	2	5	5	4	5	5	5	5	5	5	6	6	3	2	-99	-99	Mozilla/5.0 (Linux; Android 11; SM-G973F) AppleWebKit/537.36 (KHTML, like Gecko) Chrome/89.0.4389.105 Mobile Safari/537.36	-99
867	0	0	31	5822659	-77	1689	-77	-77	-99	-99	d	2	3	22	1	2	1	0	0	0	0	-99	5	6	4	3	2	1	3	1	1	1	5	6	5	5	3	3	6	4	4	4	4	2	2	-99	-99	Mozilla/5.0 (Windows NT 10.0; Win64; x64) AppleWebKit/537.36 (KHTML, like Gecko) Chrome/89.0.4389.90 Safari/537.36	https://deref-gmx.net/
860	0	0	31	5822659	-77	899	-77	-77	-99	-99	d	2	6	25	2	2	1	0	0	0	0	-99	5	6	5	5	3	3	3	4	3	2	7	6	6	6	5	6	6	7	4	6	7	5	5	-99	-99	Mozilla/5.0 (Windows NT 10.0; Win64; x64) AppleWebKit/537.36 (KHTML, like Gecko) Chrome/89.0.4389.114 Safari/537.36	-99
858	0	0	31	5822659	-77	843	-77	-77	-99	-99	d	2	7	22	2	2	1	0	0	0	0	-99	3	3	3	3	2	2	2	4	2	1	7	6	7	6	5	6	6	6	2	6	4	2	4	-99	-99	Mozilla/5.0 (iPhone; CPU iPhone OS 14_4 like Mac OS X) AppleWebKit/605.1.15 (KHTML, like Gecko) Version/14.0.3 Mobile/15E148 Safari/604.1	-99
1237	0	0	31	5822659	-77	1080	-77	-77	-99	-99	d	2	3	24	1	2	1	0	0	0	0	-99	5	5	2	3	1	1	4	1	1	1	7	7	7	7	4	5	7	6	7	5	7	3	5	In Anbetracht der aktuellen Lage, hätte es meiner Meinung nach in jedem Semester (unabhängig ob Klinik oder Vorklinik) eine Aufklärungskampagne zu oben genannten Themen geben sollen. Bisher gab es dazu für mich und mein Semester keine Infos.	-99	Mozilla/5.0 (Windows NT 10.0; Win64; x64; rv:87.0) Gecko/20100101 Firefox/87.0	https://wm.hrz.uni-giessen.de/
863	0	0	31	5822659	-77	1963	-77	-77	-99	-99	d	2	3	25	2	2	1	1	0	0	0	-99	3	4	4	4	2	1	1	1	1	1	7	7	7	7	6	7	7	7	4	4	7	3	3	-99	-99	Mozilla/5.0 (iPhone; CPU iPhone OS 14_4_2 like Mac OS X) AppleWebKit/605.1.15 (KHTML, like Gecko) Version/14.0.3 Mobile/15E148 Safari/604.1	-99
862	0	0	31	5822659	-77	1099	-77	-77	-99	-99	d	2	5	22	2	2	1	0	0	0	0	-99	7	6	5	5	0	0	0	0	0	0	7	2	7	7	4	7	7	7	7	1	1	4	5	-99	-99	Mozilla/5.0 (Macintosh; Intel Mac OS X 10_15_6) AppleWebKit/605.1.15 (KHTML, like Gecko) Version/14.0.3 Safari/605.1.15	https://wm.hrz.uni-giessen.de/horde/imp/dynamic.php?page=mailbox
864	0	0	31	5822659	-77	917	-77	-77	-99	-99	d	5	9	23	2	2	1	0	0	0	0	-99	6	6	6	5	2	2	2	2	2	2	7	6	6	6	6	6	6	6	5	5	5	2	2	-99	-99	Mozilla/5.0 (Linux; Android 10; SAMSUNG SM-G980F) AppleWebKit/537.36 (KHTML, like Gecko) SamsungBrowser/13.2 Chrome/83.0.4103.106 Mobile Safari/537.36	-99
865	0	0	31	5822659	-77	1084	-77	-77	-99	-99	d	2	3	37	2	2	1	0	0	0	0	-99	6	7	5	5	1	1	1	1	1	5	7	7	7	7	7	7	7	7	7	7	7	7	7	-99	-99	Mozilla/5.0 (Linux; Android 10; M2007J20CG) AppleWebKit/537.36 (KHTML, like Gecko) Chrome/89.0.4389.86 Mobile Safari/537.36	-99
869	0	0	31	5822659	-77	2060	-77	-77	-99	-99	d	2	5	29	2	2	0	1	0	0	0	-99	3	1	1	1	2	2	0	0	0	0	0	0	0	0	0	0	0	0	0	0	0	0	0	-99	-99	Mozilla/5.0 (Windows NT 10.0; Win64; x64; rv:87.0) Gecko/20100101 Firefox/87.0	-99
868	0	0	31	5822659	-77	742	-77	-77	-99	-99	d	2	8	27	2	2	0	1	0	0	0	-99	3	3	6	3	1	1	1	1	1	1	3	3	4	3	1	3	3	6	4	4	4	1	2	-99	-99	Mozilla/5.0 (iPhone; CPU iPhone OS 14_4_1 like Mac OS X) AppleWebKit/605.1.15 (KHTML, like Gecko) Version/14.0.3 Mobile/15E148 Safari/604.1	https://wm.hrz.uni-giessen.de/horde/imp/smartmobile.php
872	0	0	31	5822659	-77	1946	-77	-77	-99	-99	d	2	6	24	2	2	1	0	0	0	0	-99	6	2	1	2	1	1	2	1	1	1	6	7	7	6	5	3	5	7	7	1	1	6	4	-99	-99	Mozilla/5.0 (iPhone; CPU iPhone OS 14_4_1 like Mac OS X) AppleWebKit/605.1.15 (KHTML, like Gecko) Version/14.0.3 Mobile/15E148 Safari/604.1	-99
870	0	0	31	5822659	-77	3627	-77	-77	-99	-99	d	2	1	22	2	2	0	1	0	0	0	-99	6	5	5	5	1	1	1	1	1	1	1	5	6	6	6	5	5	6	5	3	5	2	2	-99	-99	Mozilla/5.0 (Linux; Android 8.0.0; SM-G930F Build/R16NW; wv) AppleWebKit/537.36 (KHTML, like Gecko) Version/4.0 Chrome/89.0.4389.105 Mobile Safari/537.36 StudoBrowser/3.35.1-android-studo (https://studo.com/studo-browser-information-and-contact)	-99
880	0	0	31	5822659	-77	1184	-77	-77	-99	-99	d	2	4	27	2	2	1	0	0	0	0	-99	7	7	4	4	1	1	1	1	1	1	7	7	7	2	4	3	6	6	7	4	4	2	2	-99	-99	Mozilla/5.0 (iPhone; CPU iPhone OS 14_4 like Mac OS X) AppleWebKit/605.1.15 (KHTML, like Gecko) Version/14.0.3 Mobile/15E148 Safari/604.1	-99
873	0	0	31	5822659	-77	1786	-77	-77	-99	-99	d	2	4	31	1	2	1	0	0	0	0	-99	6	6	6	6	4	4	4	4	4	4	6	4	4	4	4	4	4	5	4	4	4	4	4	-99	-99	Mozilla/5.0 (Windows NT 10.0; Win64; x64) AppleWebKit/537.36 (KHTML, like Gecko) Chrome/89.0.4389.90 Safari/537.36 Edg/89.0.774.63	-99
919	0	0	31	5822659	-77	2700	-77	-77	-99	-99	d	2	6	23	2	2	1	1	0	0	0	-99	2	4	4	3	3	3	5	5	3	3	6	5	4	5	3	5	2	4	2	5	2	2	2	-99	-99	Mozilla/5.0 (Linux; Android 10; VOG-L29) AppleWebKit/537.36 (KHTML, like Gecko) Chrome/89.0.4389.105 Mobile Safari/537.36	-99
875	0	0	31	5822659	-77	1027	-77	-77	-99	-99	d	2	10	27	2	2	1	0	0	0	0	-99	7	7	5	5	1	1	1	1	1	1	7	7	6	6	6	6	6	6	6	6	6	6	6	-99	-99	Mozilla/5.0 (iPhone; CPU iPhone OS 14_4_2 like Mac OS X) AppleWebKit/605.1.15 (KHTML, like Gecko) Version/14.0.3 Mobile/15E148 Safari/604.1	-99
876	0	0	31	5822659	-77	955	-77	-77	-99	-99	d	2	7	31	2	2	0	1	0	0	0	-99	2	4	4	3	2	1	4	2	1	1	6	5	6	5	5	5	5	6	2	6	7	1	1	-99	-99	Mozilla/5.0 (Windows NT 10.0; Win64; x64; rv:87.0) Gecko/20100101 Firefox/87.0	-99
877	0	0	31	5812245	-77	11	-77	-77	-99	-99	d	1	-66	-66	-77	-77	-77	-77	-77	-77	-77	-66	-77	-77	-77	-77	-77	-77	-77	-77	-77	-77	-77	-77	-77	-77	-77	-77	-77	-77	-77	-77	-77	-77	-77	-66	-66	Mozilla/5.0 (Windows NT 10.0; Win64; x64) AppleWebKit/537.36 (KHTML, like Gecko) Chrome/89.0.4389.90 Safari/537.36 Edg/89.0.774.63	-99
879	0	0	32	5822659	-77	-1	-77	-77	-99	-99	d	2	4	20	2	2	1	0	0	0	0	-99	6	7	7	6	2	1	1	1	1	1	6	5	5	5	6	5	7	6	4	5	6	2	1	-99	-99	Mozilla/5.0 (Linux; Android 7.0; BLN-L21) AppleWebKit/537.36 (KHTML, like Gecko) Chrome/89.0.4389.105 Mobile Safari/537.36	https://webmail.stud.uni-giessen.de/
885	0	0	31	5822659	-77	1528	-77	-77	-99	-99	d	5	9	27	2	2	1	0	0	0	0	-99	5	6	6	6	4	2	6	5	1	1	7	7	5	6	5	5	6	6	6	4	4	2	2	/	/	Mozilla/5.0 (Macintosh; Intel Mac OS X 10_15_6) AppleWebKit/605.1.15 (KHTML, like Gecko) Version/14.0.3 Safari/605.1.15	https://wm.hrz.uni-giessen.de/horde/imp/dynamic.php?page=mailbox
884	0	0	31	5822659	-77	898	-77	-77	-99	-99	d	2	7	20	1	2	1	0	0	0	0	-99	7	7	7	7	7	7	7	7	7	4	7	7	7	7	7	7	7	7	6	2	4	3	7	-99	-99	Mozilla/5.0 (iPhone; CPU iPhone OS 14_4_1 like Mac OS X) AppleWebKit/605.1.15 (KHTML, like Gecko) Version/14.0.3 Mobile/15E148 Safari/604.1	https://wm.hrz.uni-giessen.de/horde/imp/smartmobile.php
886	0	0	31	5822659	-77	1493	-77	-77	-99	-99	d	2	4	19	2	2	1	0	0	0	0	-99	5	5	5	5	2	2	5	2	2	2	7	7	7	7	7	7	7	7	7	3	3	3	3	-99	-99	Mozilla/5.0 (Windows NT 10.0; Win64; x64) AppleWebKit/537.36 (KHTML, like Gecko) Chrome/89.0.4389.90 Safari/537.36 Edg/89.0.774.63	-99
887	0	0	31	5822659	-77	1099	-77	-77	-99	-99	d	2	10	22	2	2	1	0	0	0	0	-99	4	5	5	5	4	2	6	4	2	2	6	6	6	6	6	6	6	6	6	6	6	4	3	-99	-99	Mozilla/5.0 (iPhone; CPU iPhone OS 14_4_1 like Mac OS X) AppleWebKit/605.1.15 (KHTML, like Gecko) Version/14.0.3 Mobile/15E148 Safari/604.1	-99
889	0	0	31	5822659	-77	1219	-77	-77	-99	-99	d	3	12	25	2	2	1	0	0	0	0	-99	3	5	7	7	7	4	7	7	5	3	7	7	7	5	6	5	7	7	4	4	6	3	3	-99	-99	Mozilla/5.0 (Windows NT 10.0; Win64; x64) AppleWebKit/537.36 (KHTML, like Gecko) Chrome/89.0.4389.114 Safari/537.36	-99
888	0	0	31	5822659	-77	1091	-77	-77	-99	-99	d	2	9	22	2	2	0	1	0	0	0	-99	7	7	7	7	2	2	7	7	7	7	7	7	7	7	5	1	7	7	6	7	7	7	7	-99	-99	Mozilla/5.0 (iPhone; CPU iPhone OS 14_4_2 like Mac OS X) AppleWebKit/605.1.15 (KHTML, like Gecko) Version/14.0.3 Mobile/15E148 Safari/604.1	https://wm.hrz.uni-giessen.de/horde/imp/smartmobile.php
890	0	0	31	5812245	-77	14	-77	-77	-99	-99	d	1	-66	-66	-77	-77	-77	-77	-77	-77	-77	-66	-77	-77	-77	-77	-77	-77	-77	-77	-77	-77	-77	-77	-77	-77	-77	-77	-77	-77	-77	-77	-77	-77	-77	-66	-66	Mozilla/5.0 (iPhone; CPU iPhone OS 13_2_2 like Mac OS X) AppleWebKit/605.1.15 (KHTML, like Gecko) Version/13.0.3 Mobile/15E148 Safari/604.1	-99
892	0	0	31	5822659	-77	1081	-77	-77	-99	-99	d	2	3	25	2	2	1	1	0	0	0	-99	6	5	5	6	2	1	2	1	1	1	7	7	7	6	6	6	7	7	5	5	5	4	5	-99	-99	Mozilla/5.0 (iPhone; CPU iPhone OS 14_4 like Mac OS X) AppleWebKit/605.1.15 (KHTML, like Gecko) Version/14.0.3 Mobile/15E148 Safari/604.1	https://wm.hrz.uni-giessen.de/horde/imp/smartmobile.php
891	0	0	31	5822659	-77	1032	-77	-77	-99	-99	d	2	10	26	1	2	1	0	0	0	0	-99	6	6	6	6	2	2	7	7	2	1	7	7	5	4	4	7	5	7	2	7	5	5	5	-99	-99	Mozilla/5.0 (Windows NT 10.0; Win64; x64; rv:87.0) Gecko/20100101 Firefox/87.0	-99
896	0	0	31	5822659	-77	1643	-77	-77	-99	-99	d	2	4	21	2	2	1	0	0	0	0	-99	1	1	2	1	0	0	0	0	0	0	0	0	0	0	0	0	0	0	0	0	0	0	0	-99	-99	Mozilla/5.0 (Linux; Android 8.1.0; BV5800) AppleWebKit/537.36 (KHTML, like Gecko) Chrome/89.0.4389.105 Mobile Safari/537.36	https://wm.hrz.uni-giessen.de/
895	0	0	31	5822659	-77	1407	-77	-77	-99	-99	d	2	6	24	2	2	1	0	0	0	0	-99	4	4	2	5	0	0	0	0	0	0	0	0	0	0	0	0	0	0	0	0	0	0	0	-99	-99	Mozilla/5.0 (Macintosh; Intel Mac OS X 10.15; rv:85.0) Gecko/20100101 Firefox/85.0	-99
897	0	0	31	5822659	-77	892	-77	-77	-99	-99	d	2	2	24	1	2	1	0	0	0	0	-99	4	6	5	6	2	2	2	2	2	2	6	6	6	5	5	4	5	5	6	2	4	3	3	-99	-99	Mozilla/5.0 (Windows NT 10.0; Win64; x64; rv:87.0) Gecko/20100101 Firefox/87.0	https://wm.hrz.uni-giessen.de/
898	0	0	31	5822659	-77	956	-77	-77	-99	-99	d	2	10	22	2	2	1	0	0	0	0	-99	7	7	4	5	5	1	5	5	2	3	7	7	6	7	4	4	7	7	7	4	5	5	5	-99	-99	Mozilla/5.0 (iPhone; CPU iPhone OS 14_4_1 like Mac OS X) AppleWebKit/605.1.15 (KHTML, like Gecko) Version/14.0.3 Mobile/15E148 Safari/604.1	-99
901	0	0	31	5822659	-77	1476	-77	-77	-99	-99	d	2	4	24	2	2	1	0	0	0	0	-99	4	5	3	5	1	1	3	3	1	1	7	7	6	6	6	6	7	6	6	4	6	1	1	-99	-99	Mozilla/5.0 (Macintosh; Intel Mac OS X 10_15_3) AppleWebKit/605.1.15 (KHTML, like Gecko) Version/13.0.5 Safari/605.1.15	-99
903	0	0	31	5822659	-77	991	-77	-77	-99	-99	d	2	2	22	2	2	1	0	0	0	0	-99	5	5	5	4	1	1	1	1	1	1	7	6	4	5	7	4	7	7	4	4	4	1	1	-99	-99	Mozilla/5.0 (iPhone; CPU iPhone OS 14_4_1 like Mac OS X) AppleWebKit/605.1.15 (KHTML, like Gecko) Version/14.0.3 Mobile/15E148 Safari/604.1	-99
902	0	0	32	5822659	-77	-1	-77	-77	-99	-99	d	2	1	20	1	2	1	0	0	0	0	-99	4	5	2	2	4	4	4	4	4	4	5	6	6	7	3	3	5	6	7	2	2	2	2	-99	-99	Mozilla/5.0 (Macintosh; Intel Mac OS X 10_15_6) AppleWebKit/605.1.15 (KHTML, like Gecko) Version/14.0.3 Safari/605.1.15	-99
904	0	0	32	5822659	-77	-1	-77	-77	-99	-99	d	2	9	23	2	2	1	0	0	0	0	-99	7	7	6	5	3	3	2	1	1	1	7	5	5	6	5	5	6	6	5	5	5	3	3	-99	-99	Mozilla/5.0 (Linux; Android 11; SAMSUNG SM-G980F) AppleWebKit/537.36 (KHTML, like Gecko) SamsungBrowser/13.2 Chrome/83.0.4103.106 Mobile Safari/537.36	-99
905	0	0	31	5822659	-77	1600	-77	-77	-99	-99	d	2	3	23	2	2	1	0	0	0	0	-99	6	6	3	3	1	1	2	1	1	1	7	6	7	7	3	3	6	6	6	6	6	2	2	-99	-99	Mozilla/5.0 (Macintosh; Intel Mac OS X 10_15) AppleWebKit/605.1.15 (KHTML, like Gecko) Version/13.0.1 Safari/605.1.15	-99
907	0	0	31	5822659	-77	1991	-77	-77	-99	-99	d	2	8	30	2	2	1	0	0	0	0	-99	6	6	5	5	3	3	3	3	3	3	7	7	7	7	4	4	7	7	1	7	4	4	4	-99	-99	Mozilla/5.0 (Linux; Android 10; FP3) AppleWebKit/537.36 (KHTML, like Gecko) Chrome/89.0.4389.105 Mobile Safari/537.36	-99
906	0	0	31	5812245	-77	16	-77	-77	-99	-99	d	1	-66	-66	-77	-77	-77	-77	-77	-77	-77	-66	-77	-77	-77	-77	-77	-77	-77	-77	-77	-77	-77	-77	-77	-77	-77	-77	-77	-77	-77	-77	-77	-77	-77	-66	-66	Mozilla/5.0 (Macintosh; Intel Mac OS X 10_13_6) AppleWebKit/605.1.15 (KHTML, like Gecko) Version/13.1.2 Safari/605.1.15	-99
908	0	0	31	5812245	-77	20	-77	-77	-99	-99	d	1	-66	-66	-77	-77	-77	-77	-77	-77	-77	-66	-77	-77	-77	-77	-77	-77	-77	-77	-77	-77	-77	-77	-77	-77	-77	-77	-77	-77	-77	-77	-77	-77	-77	-66	-66	Mozilla/5.0 (iPhone; CPU iPhone OS 14_4_1 like Mac OS X) AppleWebKit/605.1.15 (KHTML, like Gecko) Version/14.0.3 Mobile/15E148 Safari/604.1	-99
910	0	0	31	5822659	-77	2450	-77	-77	-99	-99	d	2	11	24	2	2	1	0	0	0	0	-99	7	7	4	4	3	3	5	4	0	5	5	6	7	6	6	4	6	7	4	4	4	4	4	-99	-99	Mozilla/5.0 (iPhone; CPU iPhone OS 14_4_2 like Mac OS X) AppleWebKit/605.1.15 (KHTML, like Gecko) Version/14.0.3 Mobile/15E148 Safari/604.1	-99
912	0	0	31	5812245	-77	14	-77	-77	-99	-99	d	1	-66	-66	-77	-77	-77	-77	-77	-77	-77	-66	-77	-77	-77	-77	-77	-77	-77	-77	-77	-77	-77	-77	-77	-77	-77	-77	-77	-77	-77	-77	-77	-77	-77	-66	-66	Mozilla/5.0 (Macintosh; Intel Mac OS X 10_15_6) AppleWebKit/605.1.15 (KHTML, like Gecko) Version/14.0.3 Safari/605.1.15	-99
914	0	0	31	5812245	-77	9	-77	-77	-99	-99	d	1	-66	-66	-77	-77	-77	-77	-77	-77	-77	-66	-77	-77	-77	-77	-77	-77	-77	-77	-77	-77	-77	-77	-77	-77	-77	-77	-77	-77	-77	-77	-77	-77	-77	-66	-66	Mozilla/5.0 (Linux; Android 10; MAR-LX1A) AppleWebKit/537.36 (KHTML, like Gecko) Chrome/89.0.4389.105 Mobile Safari/537.36	-99
915	0	0	31	5822659	-77	970	-77	-77	-99	-99	d	2	7	22	2	2	1	0	0	0	0	-99	4	5	3	4	4	4	4	3	1	2	5	5	5	6	3	3	6	4	3	4	5	2	2	-99	-99	Mozilla/5.0 (Macintosh; Intel Mac OS X 10_15_7) AppleWebKit/605.1.15 (KHTML, like Gecko) Version/14.0.2 Safari/605.1.15	-99
917	0	0	31	5822659	-77	1142	-77	-77	-99	-99	d	3	12	32	1	2	0	1	0	0	0	-99	7	7	7	7	2	1	5	6	3	2	7	7	7	7	7	7	7	7	5	7	7	4	5	-99	-99	Mozilla/5.0 (Macintosh; Intel Mac OS X 10.15; rv:86.0) Gecko/20100101 Firefox/86.0	-99
918	0	0	31	5822659	-77	1862	-77	-77	-99	-99	d	2	10	25	2	2	1	0	0	0	0	-99	5	6	5	5	1	1	6	3	2	3	7	7	6	5	3	3	6	6	5	6	6	3	3	-99	-99	Mozilla/5.0 (Windows NT 10.0; Win64; x64; rv:87.0) Gecko/20100101 Firefox/87.0	https://wm.hrz.uni-giessen.de/
920	0	0	31	5822659	-77	1149	-77	-77	-99	-99	d	2	2	23	1	2	0	1	0	0	0	-99	7	7	6	6	5	5	6	2	3	1	7	7	5	5	3	1	4	5	4	4	4	2	2	-99	-99	Mozilla/5.0 (Windows NT 6.1; Win64; x64) AppleWebKit/537.36 (KHTML, like Gecko) Chrome/89.0.4389.90 Safari/537.36	-99
921	0	0	31	5822659	-77	1155	-77	-77	-99	-99	d	3	12	29	1	2	0	1	0	0	0	-99	6	3	5	5	1	1	7	4	1	1	7	7	7	7	7	7	7	7	7	7	7	7	7	-99	-99	Mozilla/5.0 (iPhone; CPU iPhone OS 14_4_1 like Mac OS X) AppleWebKit/605.1.15 (KHTML, like Gecko) Version/14.0.3 Mobile/15E148 Safari/604.1	-99
922	0	0	31	5822659	-77	885	-77	-77	-99	-99	d	2	10	28	2	2	0	1	0	0	0	-99	5	5	3	3	1	1	4	3	3	3	7	7	7	7	4	7	7	7	7	7	7	1	1	-99	-99	Mozilla/5.0 (Linux; Android 11; SAMSUNG SM-G973F/G973FXXU9FUBD) AppleWebKit/537.36 (KHTML, like Gecko) SamsungBrowser/13.2 Chrome/83.0.4103.106 Mobile Safari/537.36	-99
923	0	0	31	5822659	-77	944	-77	-77	-99	-99	d	2	3	20	2	2	1	0	0	0	0	-99	2	5	4	5	2	2	4	2	2	2	6	5	6	6	3	3	5	5	4	4	5	5	5	-99	-99	Mozilla/5.0 (iPhone; CPU iPhone OS 14_4 like Mac OS X) AppleWebKit/605.1.15 (KHTML, like Gecko) Version/14.0.3 Mobile/15E148 Safari/604.1	-99
924	0	0	31	5822659	-77	876	-77	-77	-99	-99	d	2	4	22	2	2	1	0	0	0	0	-99	4	7	7	7	7	4	3	3	3	4	7	7	6	7	7	7	7	7	3	7	7	1	1	-99	-99	Mozilla/5.0 (Linux; Android 11; SM-G975F) AppleWebKit/537.36 (KHTML, like Gecko) Chrome/89.0.4389.105 Mobile Safari/537.36	https://wm.hrz.uni-giessen.de/
925	0	0	31	5822659	-77	897	-77	-77	-99	-99	d	3	16	26	2	2	1	1	0	0	0	-99	6	5	2	5	1	1	6	2	1	1	7	7	7	4	3	3	7	7	6	6	7	4	4	-99	-99	Mozilla/5.0 (Windows NT 10.0; Win64; x64; rv:87.0) Gecko/20100101 Firefox/87.0	-99
926	0	0	31	5822659	-77	1005	-77	-77	-99	-99	d	2	4	28	2	2	1	0	0	0	0	-99	6	6	4	4	2	1	2	1	1	1	7	7	7	7	7	7	7	7	7	7	7	7	7	-99	-99	Mozilla/5.0 (iPhone; CPU iPhone OS 14_4_2 like Mac OS X) AppleWebKit/605.1.15 (KHTML, like Gecko) Version/14.0.3 Mobile/15E148 Safari/604.1	-99
927	0	0	31	5822659	-77	1375	-77	-77	-99	-99	d	2	7	34	1	2	1	0	0	0	0	-99	7	7	6	6	2	1	3	2	1	1	4	3	5	5	5	2	2	4	3	2	3	2	2	-99	-99	Mozilla/5.0 (Windows NT 10.0; Win64; x64) AppleWebKit/537.36 (KHTML, like Gecko) Chrome/89.0.4389.90 Safari/537.36 Edg/89.0.774.63	-99
928	0	0	31	5822659	-77	811	-77	-77	-99	-99	d	2	10	25	2	2	1	0	0	0	0	-99	5	7	6	7	2	1	5	5	1	1	6	7	7	7	7	7	7	7	7	5	7	6	7	-99	-99	Mozilla/5.0 (iPhone; CPU iPhone OS 14_2 like Mac OS X) AppleWebKit/605.1.15 (KHTML, like Gecko) Version/14.0.1 Mobile/15E148 Safari/604.1	-99
929	0	0	31	5822659	-77	1412	-77	-77	-99	-99	d	2	10	36	1	2	1	0	0	0	0	-99	7	7	5	6	1	1	3	3	1	2	6	5	5	5	3	4	5	6	5	5	5	4	4	-99	-99	Mozilla/5.0 (iPhone; CPU iPhone OS 14_4 like Mac OS X) AppleWebKit/605.1.15 (KHTML, like Gecko) Version/14.0.3 Mobile/15E148 Safari/604.1	-99
932	0	0	31	5822659	-77	1295	-77	-77	-99	-99	d	2	10	26	1	2	1	0	0	0	0	-99	7	7	6	6	6	1	7	4	3	2	6	6	6	6	3	6	6	5	6	6	6	6	6	-99	-99	Mozilla/5.0 (iPhone; CPU iPhone OS 14_4_2 like Mac OS X) AppleWebKit/605.1.15 (KHTML, like Gecko) Version/14.0.3 Mobile/15E148 Safari/604.1	-99
930	0	0	31	5822659	-77	1503	-77	-77	-99	-99	d	2	2	26	1	2	0	1	0	0	0	-99	7	7	7	7	2	2	7	7	2	2	7	7	7	7	6	6	7	6	2	6	4	5	5	-99	-99	Mozilla/5.0 (Macintosh; Intel Mac OS X 10_15_7) AppleWebKit/605.1.15 (KHTML, like Gecko) Version/14.0.3 Safari/605.1.15	-99
931	0	0	31	5822659	-77	899	-77	-77	-99	-99	d	2	5	24	1	2	1	0	0	0	0	-99	7	7	7	7	4	4	4	4	4	4	7	7	7	7	7	6	7	7	6	6	6	6	7	-99	-99	Mozilla/5.0 (Windows NT 10.0; Win64; x64) AppleWebKit/537.36 (KHTML, like Gecko) Chrome/88.0.4324.192 Safari/537.36 OPR/74.0.3911.218	-99
933	0	0	31	5822659	-77	929	-77	-77	-99	-99	d	5	5	20	2	1	1	0	0	0	0	-99	5	3	2	4	1	1	1	1	1	1	7	7	3	6	4	4	0	6	6	6	5	3	3	-99	-99	Mozilla/5.0 (iPhone; CPU iPhone OS 14_4_1 like Mac OS X) AppleWebKit/605.1.15 (KHTML, like Gecko) Version/14.0.3 Mobile/15E148 Safari/604.1	-99
934	0	0	31	5822659	-77	846	-77	-77	-99	-99	d	2	9	23	2	2	1	1	0	0	0	-99	6	6	6	6	2	2	7	7	7	7	7	7	7	7	7	7	7	7	7	7	7	2	2	-99	-99	Mozilla/5.0 (Windows NT 10.0; Win64; x64; rv:87.0) Gecko/20100101 Firefox/87.0	https://deref-gmx.net/
936	0	0	31	5822659	-77	1409	-77	-77	-99	-99	d	2	3	19	2	2	0	1	0	0	0	-99	6	7	3	2	2	2	3	2	2	1	7	7	6	7	7	7	7	7	6	6	7	6	6	-99	-99	Mozilla/5.0 (iPhone; CPU iPhone OS 14_4_1 like Mac OS X) AppleWebKit/605.1.15 (KHTML, like Gecko) Version/14.0.3 Mobile/15E148 Safari/604.1	-99
937	0	0	31	5822659	-77	846	-77	-77	-99	-99	d	2	4	28	2	2	0	1	0	0	0	-99	5	5	5	5	4	4	4	4	4	4	7	7	6	5	6	7	7	7	3	6	6	4	4	-99	-99	Mozilla/5.0 (Linux; Android 11; SM-G970F) AppleWebKit/537.36 (KHTML, like Gecko) Chrome/89.0.4389.105 Mobile Safari/537.36	-99
939	0	0	31	5812245	-77	11	-77	-77	-99	-99	d	1	-66	-66	-77	-77	-77	-77	-77	-77	-77	-66	-77	-77	-77	-77	-77	-77	-77	-77	-77	-77	-77	-77	-77	-77	-77	-77	-77	-77	-77	-77	-77	-77	-77	-66	-66	Mozilla/5.0 (iPhone; CPU iPhone OS 14_4_1 like Mac OS X) AppleWebKit/605.1.15 (KHTML, like Gecko) Version/14.0.3 Mobile/15E148 Safari/604.1	-99
940	0	0	31	5822659	-77	1270	-77	-77	-99	-99	d	2	10	25	2	2	1	0	0	0	0	-99	6	6	3	5	2	2	5	2	2	2	6	6	6	6	3	4	5	6	6	6	6	3	3	-99	-99	Mozilla/5.0 (Windows NT 6.1; Win64; x64; rv:87.0) Gecko/20100101 Firefox/87.0	-99
941	0	0	31	5812245	-77	17	-77	-77	-99	-99	d	1	-66	-66	-77	-77	-77	-77	-77	-77	-77	-66	-77	-77	-77	-77	-77	-77	-77	-77	-77	-77	-77	-77	-77	-77	-77	-77	-77	-77	-77	-77	-77	-77	-77	-66	-66	Mozilla/5.0 (Linux; Android 9; SAMSUNG SM-J530F) AppleWebKit/537.36 (KHTML, like Gecko) SamsungBrowser/13.2 Chrome/83.0.4103.106 Mobile Safari/537.36	-99
942	0	0	31	5822659	-77	907	-77	-77	-99	-99	d	2	2	19	2	2	1	1	0	0	0	-99	4	3	2	4	0	0	0	0	0	0	0	0	0	0	0	0	0	0	0	0	0	0	0	-99	-99	Mozilla/5.0 (iPhone; CPU iPhone OS 14_4_1 like Mac OS X) AppleWebKit/605.1.15 (KHTML, like Gecko) Version/14.0.3 Mobile/15E148 Safari/604.1	-99
944	0	0	31	5812245	-77	17	-77	-77	-99	-99	d	1	-66	-66	-77	-77	-77	-77	-77	-77	-77	-66	-77	-77	-77	-77	-77	-77	-77	-77	-77	-77	-77	-77	-77	-77	-77	-77	-77	-77	-77	-77	-77	-77	-77	-66	-66	Mozilla/5.0 (Windows NT 10.0; Win64; x64) AppleWebKit/537.36 (KHTML, like Gecko) Chrome/89.0.4389.114 Safari/537.36	https://wm.hrz.uni-giessen.de/
945	0	0	31	5822659	-77	2041	-77	-77	-99	-99	d	2	3	26	2	2	1	0	0	0	0	-99	2	5	4	5	1	1	1	1	1	1	7	7	6	5	5	4	6	5	4	4	4	4	5	-99	-99	Mozilla/5.0 (iPhone; CPU iPhone OS 14_4_2 like Mac OS X) AppleWebKit/605.1.15 (KHTML, like Gecko) Version/14.0.3 Mobile/15E148 Safari/604.1	-99
946	0	0	31	5812245	-77	12	-77	-77	-99	-99	d	1	-66	-66	-77	-77	-77	-77	-77	-77	-77	-66	-77	-77	-77	-77	-77	-77	-77	-77	-77	-77	-77	-77	-77	-77	-77	-77	-77	-77	-77	-77	-77	-77	-77	-66	-66	Mozilla/5.0 (iPhone; CPU iPhone OS 14_4_2 like Mac OS X) AppleWebKit/605.1.15 (KHTML, like Gecko) Version/14.0.3 Mobile/15E148 Safari/604.1	-99
947	0	0	32	5822659	-77	-1	-77	-77	-99	-99	d	5	4	20	2	2	0	1	0	0	0	-99	4	4	4	4	4	2	4	4	4	4	4	4	4	4	4	4	4	4	4	4	4	3	3	-99	-99	Mozilla/5.0 (iPhone; CPU iPhone OS 14_4_1 like Mac OS X) AppleWebKit/605.1.15 (KHTML, like Gecko) Version/14.0.3 Mobile/15E148 Safari/604.1	-99
949	0	0	31	5822659	-77	1486	-77	-77	-99	-99	d	2	4	39	1	3	1	0	0	0	0	-99	5	5	5	5	3	4	7	4	4	4	7	7	2	2	1	1	1	2	1	4	2	2	1	-99	-99	Mozilla/5.0 (iPhone; CPU iPhone OS 14_4_1 like Mac OS X) AppleWebKit/605.1.15 (KHTML, like Gecko) Version/14.0.3 Mobile/15E148 Safari/604.1	-99
952	0	0	31	5822659	-77	819	-77	-77	-99	-99	d	2	10	30	2	2	1	0	0	0	0	-99	3	3	4	4	2	2	4	4	2	2	7	5	4	4	4	3	5	4	5	4	5	3	2	-99	-99	Mozilla/5.0 (Linux; Android 7.1.1; E5823) AppleWebKit/537.36 (KHTML, like Gecko) Chrome/89.0.4389.105 Mobile Safari/537.36	-99
951	0	0	31	5822659	-77	733	-77	-77	-99	-99	d	2	1	21	1	2	1	0	0	0	0	-99	3	5	4	4	4	4	4	4	4	4	6	4	4	4	4	4	4	4	4	4	4	4	4	-99	-99	Mozilla/5.0 (Windows NT 10.0; Win64; x64; rv:87.0) Gecko/20100101 Firefox/87.0	-99
954	0	0	31	5812245	-77	12	-77	-77	-99	-99	d	1	-66	-66	-77	-77	-77	-77	-77	-77	-77	-66	-77	-77	-77	-77	-77	-77	-77	-77	-77	-77	-77	-77	-77	-77	-77	-77	-77	-77	-77	-77	-77	-77	-77	-66	-66	Mozilla/5.0 (Linux; Android 9; ONEPLUS A3003) AppleWebKit/537.36 (KHTML, like Gecko) Chrome/89.0.4389.105 Mobile Safari/537.36	android-app://com.google.android.gm/
955	0	0	31	5822659	-77	1359	-77	-77	-99	-99	d	2	5	22	2	2	1	0	0	0	0	-99	7	7	7	7	1	1	3	1	1	1	7	7	7	7	7	1	7	4	4	4	4	1	1	-99	-99	Mozilla/5.0 (Windows NT 10.0; WOW64; Trident/7.0; rv:11.0) like Gecko	-99
957	0	0	31	5822659	-77	1296	-77	-77	-99	-99	d	2	4	21	1	2	1	0	0	0	0	-99	6	6	5	5	3	3	6	4	4	3	7	3	7	7	5	5	5	5	6	4	4	4	4	-99	-99	Mozilla/5.0 (iPhone; CPU iPhone OS 13_5_1 like Mac OS X) AppleWebKit/605.1.15 (KHTML, like Gecko) Mobile/15E148 StudoBrowser/4.02.3-ios-studo (https://studo.com/studo-browser-information-and-contact)	-99
958	0	0	32	5822659	-77	-1	-77	-77	-99	-99	d	2	1	20	2	2	1	0	0	0	0	-99	7	6	6	6	3	3	3	1	3	1	7	7	7	7	7	6	7	6	4	4	6	5	6	-99	-99	Mozilla/5.0 (X11; Linux x86_64) AppleWebKit/537.36 (KHTML, like Gecko) SamsungBrowser/13.2 Chrome/83.0.4103.106 Safari/537.36	-99
962	0	0	31	5822659	-77	2129	-77	-77	-99	-99	d	2	9	22	2	2	1	0	0	0	0	-99	4	6	5	5	4	4	6	5	4	2	6	6	6	6	4	3	6	6	4	4	5	4	3	-99	-99	Mozilla/5.0 (Linux; Android 8.0.0; SAMSUNG SM-G930F) AppleWebKit/537.36 (KHTML, like Gecko) SamsungBrowser/13.2 Chrome/83.0.4103.106 Mobile Safari/537.36	https://wm.hrz.uni-giessen.de/horde/imp/smartmobile.php
960	0	0	31	5822659	-77	550	-77	-77	-99	-99	d	2	4	22	1	2	1	0	0	0	0	-99	5	6	5	7	1	1	1	1	5	1	6	6	6	6	5	4	5	5	6	4	7	5	5	-99	-99	Mozilla/5.0 (Macintosh; Intel Mac OS X 10_15_6) AppleWebKit/605.1.15 (KHTML, like Gecko) Version/14.0.3 Safari/605.1.15	https://wm.hrz.uni-giessen.de/horde/imp/dynamic.php?page=mailbox
964	0	0	31	5822659	-77	910	-77	-77	-99	-99	d	2	7	27	2	2	1	0	0	0	0	-99	3	5	4	5	2	1	4	1	1	1	7	7	7	7	7	5	7	7	4	4	4	4	4	-99	-99	Mozilla/5.0 (iPhone; CPU iPhone OS 14_4_1 like Mac OS X) AppleWebKit/605.1.15 (KHTML, like Gecko) Version/14.0.3 Mobile/15E148 Safari/604.1	-99
963	0	0	31	5822659	-77	1593	-77	-77	-99	-99	d	2	3	25	1	2	1	0	0	0	0	-99	5	5	4	7	3	4	4	1	1	1	7	7	7	7	7	7	7	4	1	7	7	4	4	-99	-99	Mozilla/5.0 (iPhone; CPU iPhone OS 14_4_2 like Mac OS X) AppleWebKit/605.1.15 (KHTML, like Gecko) Version/14.0.3 Mobile/15E148 Safari/604.1	-99
968	0	0	31	5822659	-77	1511	-77	-77	-99	-99	d	2	4	26	2	2	1	0	0	0	0	-99	5	6	5	5	1	1	1	1	5	2	7	5	5	4	4	6	5	4	4	4	5	1	1	-99	-99	Mozilla/5.0 (iPhone; CPU iPhone OS 14_4_1 like Mac OS X) AppleWebKit/605.1.15 (KHTML, like Gecko) Version/14.0.3 Mobile/15E148 Safari/604.1	-99
966	0	0	31	5822659	-77	814	-77	-77	-99	-99	d	2	5	22	2	2	1	0	0	0	0	-99	7	7	6	3	2	1	6	1	1	1	7	7	7	7	7	7	7	7	7	3	7	4	4	-99	-99	Mozilla/5.0 (iPhone; CPU iPhone OS 12_1 like Mac OS X) AppleWebKit/605.1.15 (KHTML, like Gecko) Version/12.0 Mobile/15E148 Safari/604.1	-99
967	0	0	31	5822659	-77	1167	-77	-77	-99	-99	d	2	10	38	2	2	1	0	0	0	0	-99	5	7	6	6	5	2	6	7	1	1	7	7	7	7	7	7	7	7	7	1	6	1	1	-99	-99	Mozilla/5.0 (Linux; Android 8.0.0; SAMSUNG SM-A520F) AppleWebKit/537.36 (KHTML, like Gecko) SamsungBrowser/13.2 Chrome/83.0.4103.106 Mobile Safari/537.36	-99
970	0	0	31	5822659	-77	631	-77	-77	-99	-99	d	2	3	25	2	2	1	0	0	0	0	-99	4	6	3	3	3	2	3	1	2	1	7	7	7	7	7	7	7	7	7	3	7	4	4	-99	-99	Mozilla/5.0 (Macintosh; Intel Mac OS X 10_15_6) AppleWebKit/605.1.15 (KHTML, like Gecko) Version/14.0.3 Safari/605.1.15	-99
969	0	0	31	5822659	-77	900	-77	-77	-99	-99	d	2	6	32	1	2	1	0	0	0	0	-99	5	3	3	4	2	2	2	2	2	2	7	4	4	5	5	4	4	4	7	1	4	2	2	-99	-99	Mozilla/5.0 (Windows NT 10.0; Win64; x64; rv:87.0) Gecko/20100101 Firefox/87.0	https://student.uniklinikum-leipzig.de/
972	0	0	31	5822659	-77	1361	-77	-77	-99	-99	d	2	9	29	1	2	1	0	0	0	0	-99	7	7	7	7	1	1	3	6	3	1	7	6	7	6	4	2	6	6	3	5	6	6	6	-99	-99	Mozilla/5.0 (Windows NT 10.0; Win64; x64; rv:87.0) Gecko/20100101 Firefox/87.0	-99
974	0	0	31	5822659	-77	1052	-77	-77	-99	-99	d	2	5	22	1	2	1	0	0	0	0	-99	7	7	7	7	1	1	1	1	1	1	7	6	6	6	6	6	6	6	6	6	6	6	6	-99	-99	Mozilla/5.0 (Windows NT 10.0; Win64; x64) AppleWebKit/537.36 (KHTML, like Gecko) Chrome/89.0.4389.114 Safari/537.36	-99
975	0	0	31	5822659	-77	2112	-77	-77	-99	-99	d	2	2	19	1	2	0	1	0	0	0	-99	5	5	4	4	4	4	4	4	4	4	7	4	4	4	4	4	4	4	4	5	4	4	4	-99	-99	Mozilla/5.0 (Linux; Android 10; ONEPLUS A6003 Build/QKQ1.190716.003; wv) AppleWebKit/537.36 (KHTML, like Gecko) Version/4.0 Chrome/89.0.4389.105 Mobile Safari/537.36 EdgW/1.0	-99
977	0	0	31	5822659	-77	1832	-77	-77	-99	-99	d	2	10	25	2	2	1	0	0	0	0	-99	7	7	3	7	5	2	7	7	5	1	7	7	7	7	7	7	7	7	7	2	7	3	2	-99	-99	Mozilla/5.0 (Linux; Android 11; SAMSUNG SM-G975F) AppleWebKit/537.36 (KHTML, like Gecko) SamsungBrowser/13.2 Chrome/83.0.4103.106 Mobile Safari/537.36	-99
978	0	0	31	5822659	-77	901	-77	-77	-99	-99	d	2	4	22	2	2	1	0	0	0	0	-99	6	5	2	3	1	1	1	1	1	1	7	7	7	7	7	7	7	7	7	7	7	7	7	-99	-99	Mozilla/5.0 (iPhone; CPU iPhone OS 13_7 like Mac OS X) AppleWebKit/605.1.15 (KHTML, like Gecko) Version/13.1.2 Mobile/15E148 Safari/604.1	-99
981	0	0	31	5822659	-77	1022	-77	-77	-99	-99	d	5	5	31	2	2	0	1	0	0	0	-99	6	6	6	3	1	1	1	1	1	1	7	7	7	4	4	4	4	5	5	4	4	4	4	-99	-99	Mozilla/5.0 (iPhone; CPU iPhone OS 14_4_2 like Mac OS X) AppleWebKit/605.1.15 (KHTML, like Gecko) Version/14.0.3 Mobile/15E148 Safari/604.1	-99
980	0	0	32	5822659	-77	-1	-77	-77	-99	-99	d	2	8	22	2	2	1	0	0	0	0	-99	7	7	5	7	3	1	7	6	5	5	5	5	5	5	1	2	5	5	4	4	6	1	2	-99	-99	Mozilla/5.0 (Linux; Android 10; M2007J20CG) AppleWebKit/537.36 (KHTML, like Gecko) Chrome/89.0.4389.105 Mobile Safari/537.36	-99
983	0	0	31	5822659	-77	1008	-77	-77	-99	-99	d	2	5	20	1	2	1	0	0	0	0	-99	5	6	6	5	3	3	5	4	3	2	7	5	4	5	3	2	3	5	4	4	4	3	3	-99	-99	Mozilla/5.0 (Windows NT 10.0; Win64; x64) AppleWebKit/537.36 (KHTML, like Gecko) Chrome/89.0.4389.90 Safari/537.36	https://wm.hrz.uni-giessen.de/
985	0	0	31	5822659	-77	945	-77	-77	-99	-99	d	2	3	25	2	2	1	0	0	0	0	-99	7	7	3	7	1	1	1	0	0	0	0	0	0	0	0	0	0	0	0	0	0	0	0	-99	-99	Mozilla/5.0 (X11; Linux x86_64) AppleWebKit/537.36 (KHTML, like Gecko) SamsungBrowser/13.2 Chrome/83.0.4103.106 Safari/537.36	-99
984	0	0	31	5822659	-77	2047	-77	-77	-99	-99	d	2	5	31	2	2	1	0	0	0	0	-99	3	4	5	5	1	1	1	1	1	1	6	7	7	5	3	4	6	4	6	7	6	5	5	-99	-99	Mozilla/5.0 (Linux; Android 10; H8324) AppleWebKit/537.36 (KHTML, like Gecko) Chrome/89.0.4389.105 Mobile Safari/537.36	-99
986	0	0	31	5822659	-77	1683	-77	-77	-99	-99	d	2	7	22	2	2	1	0	0	0	0	-99	5	6	6	6	1	2	1	1	1	1	7	7	7	6	5	2	5	5	7	1	1	3	3	-99	-99	Mozilla/5.0 (iPhone; CPU iPhone OS 14_4_1 like Mac OS X) AppleWebKit/605.1.15 (KHTML, like Gecko) Version/14.0.3 Mobile/15E148 Safari/604.1	-99
1000	0	0	32	5822659	-77	-1	-77	-77	-99	-99	d	2	9	24	1	2	0	1	0	0	0	-99	5	6	5	6	2	3	5	4	3	3	5	4	5	4	3	4	3	0	3	5	5	3	3	-99	-99	Mozilla/5.0 (iPhone; CPU iPhone OS 14_4 like Mac OS X) AppleWebKit/605.1.15 (KHTML, like Gecko) CriOS/87.0.4280.77 Mobile/15E148 Safari/604.1	-99
989	0	0	32	5822659	-77	-1	-77	-77	-99	-99	d	2	4	28	2	2	1	0	0	0	0	-99	4	3	2	5	1	1	1	1	1	1	7	5	5	4	3	3	5	4	4	4	4	4	4	-99	Leider viele Dopplungen. Insgesamt aber ein interessantes Thema	Mozilla/5.0 (iPhone; CPU iPhone OS 14_4 like Mac OS X) AppleWebKit/605.1.15 (KHTML, like Gecko) Version/14.0.3 Mobile/15E148 Safari/604.1	-99
1011	0	0	31	5822659	-77	3550	-77	-77	-99	-99	d	5	2	20	2	2	1	0	0	0	0	-99	6	7	3	3	0	0	0	0	0	0	7	0	0	0	0	0	0	0	0	0	0	0	0	-99	-99	Mozilla/5.0 (Macintosh; Intel Mac OS X 10_13_6) AppleWebKit/605.1.15 (KHTML, like Gecko) Version/13.1.2 Safari/605.1.15	-99
990	0	0	31	5822659	-77	1140	-77	-77	-99	-99	d	2	3	20	2	2	1	0	0	0	0	-99	7	7	5	5	2	1	1	1	1	1	7	7	7	7	5	5	7	7	4	6	7	3	3	-99	-99	Mozilla/5.0 (iPhone; CPU iPhone OS 14_4_2 like Mac OS X) AppleWebKit/605.1.15 (KHTML, like Gecko) Version/14.0.3 Mobile/15E148 Safari/604.1	https://deref-gmx.net/mail/mobile/x9Lv80FeR9U/deref/?redirectUrl=https%3A%2F%2Fww3.unipark.de%2Fuc%2FCOVRAM%2F%3Fa%3D%26b%3D%26c%3Dd
992	0	0	31	5822659	-77	1021	-77	-77	-99	-99	d	2	3	19	2	2	1	0	0	0	0	-99	6	7	5	5	4	1	3	3	2	1	5	7	5	7	1	1	1	4	1	4	5	1	1	-99	-99	Mozilla/5.0 (Linux; Android 10; MAR-LX1B) AppleWebKit/537.36 (KHTML, like Gecko) Chrome/89.0.4389.86 Mobile Safari/537.36	-99
991	0	0	31	5822659	-77	1296	-77	-77	-99	-99	d	2	6	21	2	2	1	0	0	0	0	-99	6	7	6	6	4	1	1	4	1	1	7	5	6	6	2	2	6	7	4	4	4	1	1	-99	-99	Mozilla/5.0 (Windows NT 10.0; Win64; x64; rv:87.0) Gecko/20100101 Firefox/87.0	-99
993	0	0	31	5822659	-77	660	-77	-77	-99	-99	d	2	5	20	2	2	1	0	0	0	0	-99	5	6	5	5	5	5	5	5	5	3	6	5	3	5	2	3	4	2	2	5	4	4	4	-99	-99	Mozilla/5.0 (Windows NT 10.0; Win64; x64) AppleWebKit/537.36 (KHTML, like Gecko) Chrome/89.0.4389.90 Safari/537.36	-99
995	0	0	31	5822659	-77	1241	-77	-77	-99	-99	d	2	1	19	2	2	0	1	0	0	0	-99	6	6	6	7	0	0	0	0	0	0	0	0	0	0	0	0	0	0	0	0	0	0	0	-99	-99	Mozilla/5.0 (Macintosh; Intel Mac OS X 10_15_6) AppleWebKit/605.1.15 (KHTML, like Gecko) Version/14.0.3 Safari/605.1.15	-99
996	0	0	31	5812245	-77	13	-77	-77	-99	-99	d	1	-66	-66	-77	-77	-77	-77	-77	-77	-77	-66	-77	-77	-77	-77	-77	-77	-77	-77	-77	-77	-77	-77	-77	-77	-77	-77	-77	-77	-77	-77	-77	-77	-77	-66	-66	Mozilla/5.0 (Macintosh; Intel Mac OS X 10_15_6) AppleWebKit/605.1.15 (KHTML, like Gecko) Version/14.0.3 Safari/605.1.15	-99
997	0	0	31	5822659	-77	1387	-77	-77	-99	-99	d	2	3	20	2	2	1	0	0	0	0	-99	5	5	1	2	5	3	0	0	5	5	7	5	5	5	5	5	5	5	2	6	3	3	3	-99	-99	Mozilla/5.0 (Linux; Android 9; SM-G960F) AppleWebKit/537.36 (KHTML, like Gecko) Chrome/88.0.4324.181 Mobile Safari/537.36 (Ecosia android@88.0.4324.181)	-99
998	0	0	31	5822659	-77	974	-77	-77	-99	-99	d	2	10	24	2	2	1	0	0	0	0	-99	4	5	4	4	2	2	5	3	4	2	5	5	5	5	5	4	5	5	6	3	5	3	3	-99	-99	Mozilla/5.0 (Linux; Android 11; SAMSUNG SM-G780F) AppleWebKit/537.36 (KHTML, like Gecko) SamsungBrowser/13.2 Chrome/83.0.4103.106 Mobile Safari/537.36	-99
999	0	0	31	5822659	-77	1468	-77	-77	-99	-99	d	2	4	28	1	2	1	0	0	0	0	-99	1	3	5	4	4	4	4	4	4	4	7	0	4	3	2	1	4	3	2	4	3	2	2	Ich komme erst ins vierte Semester, Impfen war noch nicht Thema	-99	Mozilla/5.0 (Windows NT 10.0; Win64; x64) AppleWebKit/537.36 (KHTML, like Gecko) Chrome/89.0.4389.114 Safari/537.36	-99
1001	0	0	32	5822659	-77	-1	-77	-77	-99	-99	d	5	4	25	2	2	1	0	0	0	0	-99	4	3	5	5	4	4	4	4	4	3	3	5	5	3	2	3	5	5	2	4	2	1	5	-99	-99	Mozilla/5.0 (iPhone; CPU iPhone OS 14_4_1 like Mac OS X) AppleWebKit/605.1.15 (KHTML, like Gecko) Version/14.0.3 Mobile/15E148 Safari/604.1	-99
1003	0	0	31	5822659	-77	1383	-77	-77	-99	-99	d	2	2	24	2	2	1	0	0	0	0	-99	6	6	6	6	0	0	5	0	0	0	6	4	4	4	5	4	5	5	4	5	4	4	4	-99	-99	Mozilla/5.0 (Macintosh; Intel Mac OS X 10.15; rv:84.0) Gecko/20100101 Firefox/84.0	https://wm.hrz.uni-giessen.de/horde/imp/dynamic.php?page=mailbox
1002	0	0	31	5822659	-77	981	-77	-77	-99	-99	d	2	4	21	2	2	1	0	0	0	0	-99	4	6	4	5	1	1	1	1	6	1	7	7	4	5	7	7	7	7	1	7	4	1	1	-99	-99	Mozilla/5.0 (Android 10; Mobile; rv:87.0) Gecko/87.0 Firefox/87.0	-99
1004	0	0	31	5822659	-77	1901	-77	-77	-99	-99	d	5	6	21	2	2	1	0	0	0	0	-99	5	6	2	2	2	2	2	2	2	2	7	7	7	7	6	5	5	5	5	6	6	6	6	-99	-99	Mozilla/5.0 (iPhone; CPU iPhone OS 14_4_1 like Mac OS X) AppleWebKit/605.1.15 (KHTML, like Gecko) Version/14.0.3 Mobile/15E148 Safari/604.1	-99
1007	0	0	31	5812245	-77	25	-77	-77	-99	-99	d	1	-66	-66	-77	-77	-77	-77	-77	-77	-77	-66	-77	-77	-77	-77	-77	-77	-77	-77	-77	-77	-77	-77	-77	-77	-77	-77	-77	-77	-77	-77	-77	-77	-77	-66	-66	Mozilla/5.0 (iPhone; CPU iPhone OS 14_2 like Mac OS X) AppleWebKit/605.1.15 (KHTML, like Gecko) Version/14.0.1 Mobile/15E148 Safari/604.1	-99
1512	0	0	31	5822659	-77	1138	-77	-77	-99	-99	d	2	4	24	2	3	0	1	0	0	0	-99	5	6	5	5	1	1	1	1	1	2	7	7	6	7	6	7	7	7	7	7	7	6	7	-99	-99	Mozilla/5.0 (Macintosh; Intel Mac OS X 10_15_7) AppleWebKit/605.1.15 (KHTML, like Gecko) Version/14.0 Safari/605.1.15	https://student.uniklinikum-leipzig.de/studium/allgemeines_interessantes.php
1005	0	0	31	5822659	-77	1291	-77	-77	-99	-99	d	2	4	20	2	2	1	0	0	0	0	-99	6	6	6	6	2	2	3	3	3	3	6	6	5	5	5	5	6	5	5	3	7	4	4	-99	-99	Mozilla/5.0 (iPhone; CPU iPhone OS 14_0 like Mac OS X) AppleWebKit/605.1.15 (KHTML, like Gecko) Mobile/15E148 StudoBrowser/4.00.2-ios-studo (https://studo.com/studo-browser-information-and-contact)	-99
1008	0	0	31	5822659	-77	1496	-77	-77	-99	-99	d	2	5	25	2	2	0	1	0	0	0	-99	5	4	3	3	2	1	4	2	3	1	7	7	7	6	4	7	7	7	7	7	7	2	2	-99	-99	Mozilla/5.0 (iPhone; CPU iPhone OS 14_4_2 like Mac OS X) AppleWebKit/605.1.15 (KHTML, like Gecko) Version/14.0.3 Mobile/15E148 Safari/604.1	-99
1009	0	0	31	5822659	-77	1263	-77	-77	-99	-99	d	3	11	35	1	2	1	0	0	0	0	-99	5	5	5	2	3	2	6	4	1	1	7	7	2	5	5	1	5	1	6	1	1	5	5	-99	-99	Mozilla/5.0 (Windows NT 6.1; Win64; x64; rv:87.0) Gecko/20100101 Firefox/87.0	-99
1010	0	0	31	5822659	-77	1415	-77	-77	-99	-99	d	2	3	43	2	2	1	0	0	0	0	-99	7	7	6	7	3	2	5	3	1	1	5	5	6	6	6	6	6	6	5	5	7	5	5	Es wurden diesbezpglich nur sehr spärliche Grundlagen vermittelt. Die Arten der Impfung. Allerdings bin ich ja noch Vorklinik. Eventuell kommt im klin. Abschnitt mehr dazu. Beratungsgespräche und auch schwierige Situationen mit Patienten werden definitiv zu wenig berücksichtigt.	-99	Mozilla/5.0 (Linux; Android 11; SM-G985F) AppleWebKit/537.36 (KHTML, like Gecko) Chrome/80.0.3987.149 Mobile Safari/537.36	android-app://com.google.android.gm
1012	0	0	31	5822659	-77	1178	-77	-77	-99	-99	d	2	2	26	1	2	1	0	0	0	0	-99	5	5	4	3	2	1	2	1	1	1	7	4	4	0	0	0	0	0	0	0	0	0	0	-99	-99	Mozilla/5.0 (Windows NT 10.0; Win64; x64; rv:87.0) Gecko/20100101 Firefox/87.0	https://webmail.stud.uni-giessen.de/
1013	0	0	31	5822659	-77	970	-77	-77	-99	-99	d	2	4	22	2	2	1	1	0	0	0	-99	6	5	3	3	3	2	3	4	4	3	6	6	6	6	6	2	6	6	6	2	2	5	5	-99	-99	Mozilla/5.0 (iPhone; CPU iPhone OS 14_4_1 like Mac OS X) AppleWebKit/605.1.15 (KHTML, like Gecko) Mobile/15E148 StudoBrowser/4.02.3-ios-studo (https://studo.com/studo-browser-information-and-contact)	-99
1016	0	0	31	5822659	-77	2359	-77	-77	-99	-99	d	2	8	25	2	2	1	1	0	1	0	-99	0	7	4	3	0	0	0	0	0	0	0	0	0	0	0	0	0	0	0	0	0	0	0	-99	-99	Mozilla/5.0 (Linux; Android 10; Nokia 7 plus) AppleWebKit/537.36 (KHTML, like Gecko) Chrome/88.0.4324.181 Mobile Safari/537.36 (Ecosia android@88.0.4324.181)	-99
1017	0	0	31	5822659	-77	2110	-77	-77	-99	-99	d	2	3	23	1	1	0	1	0	0	0	-99	7	7	7	6	5	5	5	5	5	4	5	7	7	7	7	5	7	7	7	2	4	3	3	-99	-99	Mozilla/5.0 (iPhone; CPU iPhone OS 14_4_1 like Mac OS X) AppleWebKit/605.1.15 (KHTML, like Gecko) Version/14.0.3 Mobile/15E148 Safari/604.1	-99
1019	0	0	31	5822659	-77	1061	-77	-77	-99	-99	d	2	5	28	2	2	1	0	0	0	0	-99	5	3	2	2	1	1	1	1	1	1	7	7	7	7	7	7	7	7	4	4	6	1	1	-99	-99	Mozilla/5.0 (iPhone; CPU iPhone OS 14_4_2 like Mac OS X) AppleWebKit/605.1.15 (KHTML, like Gecko) Version/14.0.3 Mobile/15E148 Safari/604.1	-99
1021	0	0	31	5822659	-77	996	-77	-77	-99	-99	d	2	5	30	2	2	1	0	0	0	0	-99	6	5	5	5	4	2	5	3	2	2	6	6	6	4	5	5	4	4	4	4	4	4	4	-99	-99	Mozilla/5.0 (Linux; Android 10; SM-A600FN) AppleWebKit/537.36 (KHTML, like Gecko) Chrome/88.0.4324.181 Mobile Safari/537.36 (Ecosia android@88.0.4324.181)	-99
1022	0	0	31	5822659	-77	1228	-77	-77	-99	-99	d	5	11	24	2	2	1	0	0	0	0	-99	4	6	4	4	1	3	1	1	1	1	7	7	7	7	4	3	4	4	4	3	3	4	1	-99	-99	Mozilla/5.0 (iPhone; CPU iPhone OS 14_3 like Mac OS X) AppleWebKit/605.1.15 (KHTML, like Gecko) Version/14.0.2 Mobile/15E148 Safari/604.1	-99
1024	0	0	31	5822659	-77	1987	-77	-77	-99	-99	d	2	7	24	2	2	1	1	0	0	0	-99	6	5	2	4	1	1	1	2	1	1	7	6	6	6	6	6	6	6	6	2	4	4	4	-99	-99	Mozilla/5.0 (iPhone; CPU iPhone OS 14_4_1 like Mac OS X) AppleWebKit/605.1.15 (KHTML, like Gecko) Version/14.0.3 Mobile/15E148 Safari/604.1	-99
1025	0	0	31	5822659	-77	1251	-77	-77	-99	-99	d	5	1	20	2	2	1	1	0	0	0	-99	3	6	5	6	4	4	4	4	4	4	7	7	7	6	7	7	5	7	5	5	5	6	5	-99	-99	Mozilla/5.0 (iPhone; CPU iPhone OS 14_4 like Mac OS X) AppleWebKit/605.1.15 (KHTML, like Gecko) Version/14.0.3 Mobile/15E148 Safari/604.1	-99
1026	0	0	31	5822659	-77	1127	-77	-77	-99	-99	d	2	5	24	2	2	0	1	0	0	0	-99	5	3	2	2	4	3	1	1	1	2	7	7	7	5	4	4	5	5	3	4	4	3	3	-99	-99	Mozilla/5.0 (Linux; Android 10; SM-G960F) AppleWebKit/537.36 (KHTML, like Gecko) Chrome/89.0.4389.105 Mobile Safari/537.36	android-app://com.google.android.gm/
1027	0	0	31	5822659	-77	1893	-77	-77	-99	-99	d	2	8	22	1	2	1	0	0	0	0	-99	5	5	6	6	2	2	3	3	2	2	5	5	4	5	4	4	5	5	2	5	3	2	2	-99	Ich habe habe dieses Semester eine Famulatur in der Neurologie gemacht. Dort habe ich Patienten mit schweren COVID Verläufen gesehen, die nach einer Virus Enzephalitis schwer betroffen waren. Aber ich habe auch die Schattenseiten von AstraZeneca gesehen. Jeden Tag kamen 6-7 Patienten mit starken Kopfschmerzen und Schwächegefühl nach Impfung mit AstraZeneca. Häufig schon drei Wochen lang bestehend…	Mozilla/5.0 (Windows NT 10.0; Win64; x64) AppleWebKit/537.36 (KHTML, like Gecko) Chrome/89.0.4389.90 Safari/537.36 Edg/89.0.774.63	-99
1028	0	0	31	5822659	-77	927	-77	-77	-99	-99	d	2	4	20	2	2	1	0	0	0	0	-99	2	1	1	1	1	6	0	1	1	1	4	4	4	4	4	4	4	4	4	4	4	0	4	-99	-99	Mozilla/5.0 (Windows NT 10.0; Win64; x64; rv:87.0) Gecko/20100101 Firefox/87.0	-99
1029	0	0	31	5812245	-77	12	-77	-77	-99	-99	d	1	-66	-66	-77	-77	-77	-77	-77	-77	-77	-66	-77	-77	-77	-77	-77	-77	-77	-77	-77	-77	-77	-77	-77	-77	-77	-77	-77	-77	-77	-77	-77	-77	-77	-66	-66	Mozilla/5.0 (iPhone; CPU iPhone OS 14_4_1 like Mac OS X) AppleWebKit/605.1.15 (KHTML, like Gecko) Version/14.0.3 Mobile/15E148 Safari/604.1	-99
1372	0	0	31	5822659	-77	849	-77	-77	-99	-99	d	2	3	23	2	2	1	0	0	0	0	-99	6	6	1	4	1	1	2	1	1	1	7	7	7	7	7	5	7	4	4	4	4	5	4	-99	-99	Mozilla/5.0 (Macintosh; Intel Mac OS X 10_11_4) AppleWebKit/537.36 (KHTML, like Gecko) Chrome/89.0.4389.82 Safari/537.36	-99
1030	0	0	31	5822659	-77	1165	-77	-77	-99	-99	d	2	3	22	2	3	0	0	0	0	1	-99	7	7	7	7	4	4	4	4	4	4	7	7	7	7	7	7	7	7	7	3	6	4	4	-99	-99	Mozilla/5.0 (iPhone; CPU iPhone OS 14_4_1 like Mac OS X) AppleWebKit/605.1.15 (KHTML, like Gecko) Version/14.0.3 Mobile/15E148 Safari/604.1	-99
1031	0	0	31	5822659	-77	1018	-77	-77	-99	-99	d	2	8	30	2	2	1	0	0	0	0	-99	7	7	6	6	1	1	1	1	1	1	7	5	5	5	5	4	5	7	5	7	7	4	4	-99	-99	Mozilla/5.0 (Windows NT 10.0; Win64; x64; rv:79.0) Gecko/20100101 Firefox/79.0	-99
1032	0	0	31	5822659	-77	839	-77	-77	-99	-99	d	2	3	26	1	2	0	1	0	0	0	-99	4	5	6	6	4	4	6	6	4	4	7	7	5	5	4	4	4	4	4	4	4	4	4	-99	-99	Mozilla/5.0 (Macintosh; Intel Mac OS X 10_15_6) AppleWebKit/605.1.15 (KHTML, like Gecko) Version/14.0.3 Safari/605.1.15	https://wm.hrz.uni-giessen.de/horde/imp/dynamic.php?page=mailbox
1033	0	0	31	5822659	-77	945	-77	-77	-99	-99	d	2	7	26	1	2	1	0	0	0	0	-99	3	7	7	7	4	6	6	6	6	2	7	7	7	7	7	2	7	7	4	7	7	7	7	-99	-99	Mozilla/5.0 (Windows NT 10.0; Win64; x64; rv:87.0) Gecko/20100101 Firefox/87.0	-99
1034	0	0	31	5822659	-77	1029	-77	-77	-99	-99	d	2	2	19	1	2	1	0	0	0	0	-99	6	6	4	4	5	2	5	2	3	2	6	4	5	3	4	3	5	5	5	5	6	2	3	-99	-99	Mozilla/5.0 (Linux; Android 10; FP3 Build/8901.3.A.0084.20210204; wv) AppleWebKit/537.36 (KHTML, like Gecko) Version/4.0 Chrome/89.0.4389.105 Mobile Safari/537.36 StudoBrowser/4.02.4-android-studo (https://studo.com/studo-browser-information-and-contact)	-99
1036	0	0	31	5822659	-77	801	-77	-77	-99	-99	d	2	2	25	2	2	1	0	0	0	0	-99	2	3	2	3	1	1	1	1	1	1	0	0	0	0	0	0	0	0	0	0	0	0	0	-99	-99	Mozilla/5.0 (Macintosh; Intel Mac OS X 10_15_6) AppleWebKit/605.1.15 (KHTML, like Gecko) Version/14.0.3 Safari/605.1.15	-99
1037	0	0	31	5822659	-77	875	-77	-77	-99	-99	d	2	2	26	2	2	1	1	0	0	0	-99	6	7	7	6	1	2	3	3	1	1	7	7	5	5	3	5	5	4	7	5	0	2	2	-99	-99	Mozilla/5.0 (Macintosh; Intel Mac OS X 10.16; rv:85.0) Gecko/20100101 Firefox/85.0	-99
1040	0	0	31	5822659	-77	2602	-77	-77	-99	-99	d	2	8	24	2	2	1	0	0	0	0	-99	6	6	6	6	2	2	6	7	5	3	7	6	6	6	6	6	7	7	7	7	7	5	6	-99	-99	Mozilla/5.0 (Linux; Android 10; CLT-L29) AppleWebKit/537.36 (KHTML, like Gecko) Chrome/89.0.4389.105 Mobile Safari/537.36	-99
1038	0	0	31	5822659	-77	1251	-77	-77	-99	-99	d	2	4	20	2	2	1	0	0	0	0	-99	5	6	3	4	1	1	2	1	3	2	7	7	7	7	5	2	7	4	4	4	7	5	4	-99	-99	Mozilla/5.0 (Linux; Android 9; VTR-L09) AppleWebKit/537.36 (KHTML, like Gecko) Chrome/89.0.4389.105 Mobile Safari/537.36	android-app://com.google.android.gm/
1039	0	0	31	5812245	-77	17	-77	-77	-99	-99	d	1	-66	-66	-77	-77	-77	-77	-77	-77	-77	-66	-77	-77	-77	-77	-77	-77	-77	-77	-77	-77	-77	-77	-77	-77	-77	-77	-77	-77	-77	-77	-77	-77	-77	-66	-66	Mozilla/5.0 (iPhone; CPU iPhone OS 14_4_2 like Mac OS X) AppleWebKit/605.1.15 (KHTML, like Gecko) Version/14.0.3 Mobile/15E148 Safari/604.1	-99
1043	0	0	31	5822659	-77	1314	-77	-77	-99	-99	d	2	8	22	2	2	1	1	0	0	0	-99	6	7	6	6	1	1	3	1	1	1	2	5	2	5	1	3	6	5	1	1	4	2	2	-99	-99	Mozilla/5.0 (Windows NT 10.0; Win64; x64) AppleWebKit/537.36 (KHTML, like Gecko) Chrome/89.0.4389.90 Safari/537.36 Edg/89.0.774.63	https://webmail.stud.uni-giessen.de/
1253	0	0	31	5822659	-77	1857	-77	-77	-99	-99	d	2	9	26	2	2	1	0	0	0	0	-99	5	4	4	4	1	1	1	1	2	1	7	7	7	7	7	7	7	7	5	5	7	4	4	-99	-99	Mozilla/5.0 (iPhone; CPU iPhone OS 14_4_1 like Mac OS X) AppleWebKit/605.1.15 (KHTML, like Gecko) Version/14.0.3 Mobile/15E148 Safari/604.1	-99
1045	0	0	31	5822659	-77	1087	-77	-77	-99	-99	d	2	2	19	2	2	1	0	0	0	0	-99	6	7	2	2	3	1	2	2	3	1	7	5	3	2	2	2	5	1	1	6	1	1	1	-99	-99	Mozilla/5.0 (iPhone; CPU iPhone OS 14_4_1 like Mac OS X) AppleWebKit/605.1.15 (KHTML, like Gecko) Version/14.0.3 Mobile/15E148 Safari/604.1	-99
1046	0	0	31	5822659	-77	1646	-77	-77	-99	-99	d	2	8	25	1	2	0	1	0	0	0	-99	6	5	6	6	1	1	1	1	1	1	6	6	4	5	4	6	5	6	4	2	6	2	1	-99	-99	Mozilla/5.0 (Linux; Android 10; CLT-L29) AppleWebKit/537.36 (KHTML, like Gecko) Chrome/89.0.4389.105 Mobile Safari/537.36	-99
1047	0	0	31	5822659	-77	913	-77	-77	-99	-99	d	3	12	26	2	2	1	0	0	0	0	-99	5	7	7	6	0	0	0	0	0	0	0	0	0	0	0	0	0	0	0	0	0	0	0	-99	-99	Mozilla/5.0 (Macintosh; Intel Mac OS X 10_15_7) AppleWebKit/605.1.15 (KHTML, like Gecko) Version/14.0.1 Safari/605.1.15	-99
1048	0	0	31	5822659	-77	800	-77	-77	-99	-99	d	2	4	23	2	2	1	0	0	0	0	-99	7	7	7	7	4	4	4	4	5	4	7	6	5	7	3	3	5	6	4	4	4	4	4	-99	-99	Mozilla/5.0 (iPhone; CPU iPhone OS 14_4_2 like Mac OS X) AppleWebKit/605.1.15 (KHTML, like Gecko) Version/14.0.3 Mobile/15E148 Safari/604.1	-99
1055	0	0	31	5822659	-77	737	-77	-77	-99	-99	d	2	8	23	1	2	1	0	0	0	0	-99	4	4	6	3	3	1	2	1	1	1	7	7	7	4	1	1	7	7	1	7	2	4	4	-99	Fragen zum Impfstoff Sputnik V fehlen	Mozilla/5.0 (Windows NT 6.1; Win64; x64) AppleWebKit/537.36 (KHTML, like Gecko) Chrome/86.0.4240.111 Safari/537.36	https://webmail.stud.uni-giessen.de/
1050	0	0	31	5822659	-77	1196	-77	-77	-99	-99	d	2	2	19	1	2	1	0	0	0	0	-99	5	5	4	4	4	4	4	4	4	4	7	4	4	4	4	4	4	4	4	4	4	4	4	-99	-99	Mozilla/5.0 (Windows NT 10.0; Win64; x64) AppleWebKit/537.36 (KHTML, like Gecko) Chrome/89.0.4389.90 Safari/537.36 Edg/89.0.774.63	https://webmail.stud.uni-giessen.de/
1051	0	0	32	5822659	-77	-1	-77	-77	-99	-99	d	2	5	24	2	2	1	0	0	0	0	-99	5	5	3	4	2	1	2	1	1	1	7	7	7	7	7	7	7	7	7	2	1	7	6	-99	-99	Mozilla/5.0 (iPhone; CPU iPhone OS 14_4_2 like Mac OS X) AppleWebKit/605.1.15 (KHTML, like Gecko) Version/14.0.3 Mobile/15E148 Safari/604.1	-99
1052	0	0	32	5822659	-77	-1	-77	-77	-99	-99	d	2	8	54	2	2	1	0	0	0	0	-99	7	7	7	7	1	1	1	1	1	4	4	4	7	1	4	4	4	4	4	1	4	1	1	-99	-99	Mozilla/5.0 (iPhone; CPU iPhone OS 13_7 like Mac OS X) AppleWebKit/605.1.15 (KHTML, like Gecko) Version/13.1.2 Mobile/15E148 Safari/604.1	-99
1053	0	0	31	5822659	-77	817	-77	-77	-99	-99	d	5	3	26	2	2	0	1	0	0	0	-99	7	7	7	7	4	4	4	4	4	4	7	7	7	7	7	7	7	7	7	7	7	4	4	-99	-99	Mozilla/5.0 (Macintosh; Intel Mac OS X 10_15_6) AppleWebKit/605.1.15 (KHTML, like Gecko) Version/14.0.3 Safari/605.1.15	-99
1054	0	0	31	5822659	-77	1161	-77	-77	-99	-99	d	2	5	25	1	2	1	0	0	0	0	-99	5	6	5	2	2	2	2	2	1	1	6	6	5	6	5	4	5	4	4	4	5	1	1	-99	-99	Mozilla/5.0 (iPhone; CPU iPhone OS 14_0_1 like Mac OS X) AppleWebKit/605.1.15 (KHTML, like Gecko) Version/14.0 Mobile/15E148 Safari/604.1	-99
1056	0	0	31	5822659	-77	1122	-77	-77	-99	-99	d	2	5	24	1	2	1	0	0	0	0	-99	6	6	6	7	3	3	3	0	0	0	7	4	2	6	5	6	7	7	4	4	7	2	2	-99	-99	Mozilla/5.0 (iPhone; CPU iPhone OS 14_4 like Mac OS X) AppleWebKit/605.1.15 (KHTML, like Gecko) Version/14.0.3 Mobile/15E148 Safari/604.1	-99
1057	0	0	32	5822659	-77	-1	-77	-77	-99	-99	d	3	12	26	2	3	1	0	0	0	0	-99	5	5	4	5	2	1	6	5	4	3	5	6	5	4	4	4	4	4	4	4	4	3	3	-99	-99	Mozilla/5.0 (iPhone; CPU iPhone OS 14_4_2 like Mac OS X) AppleWebKit/605.1.15 (KHTML, like Gecko) Version/14.0.3 Mobile/15E148 Safari/604.1	-99
1059	0	0	31	5822659	-77	951	-77	-77	-99	-99	d	2	4	19	1	2	1	0	0	0	0	-99	3	2	2	2	3	3	3	3	3	2	6	6	6	5	6	6	6	6	6	6	5	5	6	-99	-99	Mozilla/5.0 (Windows NT 10.0; Win64; x64) AppleWebKit/537.36 (KHTML, like Gecko) Chrome/89.0.4389.90 Safari/537.36 Edg/89.0.774.63	https://wm.hrz.uni-giessen.de/
1060	0	0	32	5822659	-77	-1	-77	-77	-99	-99	d	5	4	19	2	2	1	0	0	0	0	-99	5	5	2	2	1	1	1	1	1	1	7	7	7	7	7	7	7	7	7	7	7	7	7	-99	-99	Mozilla/5.0 (iPhone; CPU iPhone OS 14_2 like Mac OS X) AppleWebKit/605.1.15 (KHTML, like Gecko) Version/14.0.1 Mobile/15E148 Safari/604.1	-99
1062	0	0	32	5822659	-77	-1	-77	-77	-99	-99	d	2	4	27	2	2	1	0	0	0	0	-99	2	4	4	5	1	1	4	1	1	1	7	5	5	5	1	5	5	5	4	4	5	3	3	-99	-99	Mozilla/5.0 (Linux; Android 10; Redmi Note 9 Pro) AppleWebKit/537.36 (KHTML, like Gecko) Chrome/88.0.4324.181 Mobile Safari/537.36 (Ecosia android@88.0.4324.181)	-99
1065	0	0	31	5822659	-77	1126	-77	-77	-99	-99	d	2	6	22	2	2	1	0	0	0	0	-99	4	5	4	5	2	1	2	1	1	1	7	6	4	4	2	2	5	4	4	4	4	2	2	-99	-99	Mozilla/5.0 (Windows NT 10.0; Win64; x64) AppleWebKit/537.36 (KHTML, like Gecko) Chrome/89.0.4389.90 Safari/537.36	https://webmail.stud.uni-giessen.de/
1066	0	0	31	5822659	-77	1115	-77	-77	-99	-99	d	2	6	22	2	2	1	0	0	0	0	-99	5	4	2	5	2	1	3	2	2	2	6	6	6	6	6	6	6	5	5	5	7	4	4	-99	-99	Mozilla/5.0 (iPhone; CPU iPhone OS 14_4_1 like Mac OS X) AppleWebKit/605.1.15 (KHTML, like Gecko) Version/14.0.3 Mobile/15E148 Safari/604.1	https://wm.hrz.uni-giessen.de/horde/imp/smartmobile.php
1067	0	0	31	5822659	-77	1113	-77	-77	-99	-99	d	2	3	21	2	2	1	0	0	0	0	-99	6	5	4	2	1	1	1	1	1	1	7	7	7	7	7	7	7	7	7	7	4	2	2	-99	-99	Mozilla/5.0 (iPhone; CPU iPhone OS 14_4_2 like Mac OS X) AppleWebKit/605.1.15 (KHTML, like Gecko) Version/14.0.3 Mobile/15E148 Safari/604.1	-99
1068	0	0	31	5812245	-77	15	-77	-77	-99	-99	d	1	-66	-66	-77	-77	-77	-77	-77	-77	-77	-66	-77	-77	-77	-77	-77	-77	-77	-77	-77	-77	-77	-77	-77	-77	-77	-77	-77	-77	-77	-77	-77	-77	-77	-66	-66	Mozilla/5.0 (iPhone; CPU iPhone OS 14_3 like Mac OS X) AppleWebKit/605.1.15 (KHTML, like Gecko) CriOS/87.0.4280.77 Mobile/15E148 Safari/604.1	-99
1069	0	0	32	5822659	-77	-1	-77	-77	-99	-99	d	2	8	31	2	2	1	0	0	0	0	-99	6	7	5	7	3	3	6	2	2	2	7	7	7	7	3	5	6	7	2	6	6	2	2	-99	-99	Mozilla/5.0 (iPhone; CPU iPhone OS 14_4_1 like Mac OS X) AppleWebKit/605.1.15 (KHTML, like Gecko) Version/14.0.3 Mobile/15E148 Safari/604.1	-99
1071	0	0	31	5829623	-77	202	-77	-77	-99	-99	d	2	5	0	2	2	1	0	0	0	0	-99	-77	-77	-77	-77	-77	-77	-77	-77	-77	-77	-77	-77	-77	-77	-77	-77	-77	-77	-77	-77	-77	-77	-77	-66	-66	Mozilla/5.0 (Android 7.0; Mobile; rv:87.0) Gecko/87.0 Firefox/87.0	https://webmail.stud.uni-giessen.de/
1072	0	0	31	5822659	-77	587	-77	-77	-99	-99	d	2	8	23	2	2	0	1	0	0	0	-99	7	7	5	4	0	0	0	0	0	0	0	0	0	0	0	0	0	0	0	0	0	0	0	-99	-99	Mozilla/5.0 (iPhone; CPU iPhone OS 14_4_2 like Mac OS X) AppleWebKit/605.1.15 (KHTML, like Gecko) Version/14.0.3 Mobile/15E148 Safari/604.1	https://webmail.stud.uni-giessen.de/horde/imp/smartmobile.php
1073	0	0	32	5822659	-77	-1	-77	-77	-99	-99	d	2	6	21	2	2	0	1	0	0	0	-99	7	7	6	6	1	2	4	4	2	1	7	7	7	7	5	7	7	7	7	6	7	6	6	-99	-99	Mozilla/5.0 (Linux; Android 10; BLA-L09) AppleWebKit/537.36 (KHTML, like Gecko) Chrome/89.0.4389.105 Mobile Safari/537.36	https://wm.hrz.uni-giessen.de/
1075	0	0	31	5822659	-77	2114	-77	-77	-99	-99	d	2	6	21	1	2	1	0	0	0	0	-99	5	5	5	6	4	3	3	3	3	2	7	7	5	7	4	4	5	5	3	5	4	3	3	-99	-99	Mozilla/5.0 (iPhone; CPU iPhone OS 12_1 like Mac OS X) AppleWebKit/605.1.15 (KHTML, like Gecko) Version/12.0 Mobile/15E148 Safari/604.1	-99
1074	0	0	31	5822659	-77	1243	-77	-77	-99	-99	d	2	6	29	2	2	1	0	0	0	0	-99	6	7	6	6	2	2	4	1	1	1	7	7	7	7	3	3	7	7	3	3	6	2	2	-99	Es fehlt eventuell eine Möglichkeit anzugeben, dass man geimpft wurde obwohl man bis jetzt noch keinen Anspruch auf die Impfung hatte. Bei mir war dies der Fall, da ein Freund im Impfzentrum arbeitet und mir Bescheid gegeben hat als am Abend eine Impfdosis übrig war. Das ist grade in der Anfangszeit bei vielen der Fall gewesen.	Mozilla/5.0 (Macintosh; Intel Mac OS X 10_13_6) AppleWebKit/605.1.15 (KHTML, like Gecko) Version/13.1.2 Safari/605.1.15	-99
1076	0	0	31	5822659	-77	1271	-77	-77	-99	-99	d	2	10	32	1	2	1	0	0	0	0	-99	6	6	6	6	1	1	4	4	4	1	7	7	7	7	7	7	7	7	7	7	7	7	7	-99	-99	Mozilla/5.0 (Windows NT 10.0) AppleWebKit/537.36 (KHTML, like Gecko) Chrome/89.0.4389.90 Safari/537.36	https://webmail.stud.uni-giessen.de/
1077	0	0	31	5822659	-77	1049	-77	-77	-99	-99	d	2	13	26	1	2	0	1	0	0	0	-99	4	4	7	6	4	4	4	4	4	5	7	7	5	5	4	4	5	5	5	5	4	5	5	-99	-99	Mozilla/5.0 (Linux; Android 10; A80Pro) AppleWebKit/537.36 (KHTML, like Gecko) Chrome/89.0.4389.105 Mobile Safari/537.36	-99
1078	0	0	31	5829623	-77	106	-77	-77	-99	-99	d	2	1	17	1	2	1	0	0	0	0	-99	-77	-77	-77	-77	-77	-77	-77	-77	-77	-77	-77	-77	-77	-77	-77	-77	-77	-77	-77	-77	-77	-77	-77	-66	-66	Mozilla/5.0 (Linux; Android 10; SM-A505FN) AppleWebKit/537.36 (KHTML, like Gecko) Chrome/89.0.4389.105 Mobile Safari/537.36	https://deref-web.de/
1079	0	0	31	5822659	-77	1547	-77	-77	-99	-99	d	2	7	24	2	2	1	0	0	0	0	-99	6	6	5	4	2	2	6	4	3	2	7	6	5	5	5	4	6	5	4	4	5	4	4	-99	-99	Mozilla/5.0 (Linux; Android 8.0.0; F8332) AppleWebKit/537.36 (KHTML, like Gecko) Chrome/89.0.4389.105 Mobile Safari/537.36	-99
1080	0	0	32	5822659	-77	-1	-77	-77	-99	-99	d	2	4	48	2	2	0	1	0	0	0	-99	1	1	5	5	1	1	2	1	4	1	4	4	4	4	1	3	2	4	4	4	4	3	2	-99	-99	Mozilla/5.0 (Linux; Android 9; VKY-L09) AppleWebKit/537.36 (KHTML, like Gecko) Chrome/89.0.4389.105 Mobile Safari/537.36	-99
1081	0	0	31	5822659	-77	1280	-77	-77	-99	-99	d	3	11	30	1	2	1	0	0	0	0	-99	5	6	6	6	1	1	7	7	4	1	7	4	4	5	2	2	5	5	5	3	6	2	2	-99	-99	Mozilla/5.0 (iPhone; CPU iPhone OS 14_4 like Mac OS X) AppleWebKit/605.1.15 (KHTML, like Gecko) Version/14.0.3 Mobile/15E148 Safari/604.1	-99
1082	0	0	31	5812245	-77	12	-77	-77	-99	-99	d	1	-66	-66	-77	-77	-77	-77	-77	-77	-77	-66	-77	-77	-77	-77	-77	-77	-77	-77	-77	-77	-77	-77	-77	-77	-77	-77	-77	-77	-77	-77	-77	-77	-77	-66	-66	Mozilla/5.0 (iPhone; CPU iPhone OS 14_4_2 like Mac OS X) AppleWebKit/605.1.15 (KHTML, like Gecko) Version/14.0.3 Mobile/15E148 Safari/604.1	-99
1083	0	0	31	5822659	-77	935	-77	-77	-99	-99	d	2	9	27	2	2	1	0	0	0	0	-99	4	3	2	3	3	3	3	4	4	3	6	7	6	5	7	4	7	7	7	3	4	4	3	-99	-99	Mozilla/5.0 (iPhone; CPU iPhone OS 14_4_2 like Mac OS X) AppleWebKit/605.1.15 (KHTML, like Gecko) Version/14.0.3 Mobile/15E148 Safari/604.1	-99
1084	0	0	31	5822659	-77	1887	-77	-77	-99	-99	d	2	3	25	2	2	1	0	0	0	0	-99	5	6	5	5	0	0	0	0	0	0	0	0	0	0	0	0	0	0	0	0	0	0	0	-99	-99	Mozilla/5.0 (Linux; Android 7.0; SM-G930F) AppleWebKit/537.36 (KHTML, like Gecko) Chrome/89.0.4389.105 Mobile Safari/537.36	-99
1085	0	0	31	5822659	-77	989	-77	-77	-99	-99	d	2	2	25	2	2	1	0	0	0	0	-99	5	5	4	5	1	1	1	1	1	1	7	6	6	6	5	5	6	7	4	4	4	3	3	-99	-99	Mozilla/5.0 (Macintosh; Intel Mac OS X 10_15_6) AppleWebKit/605.1.15 (KHTML, like Gecko) Version/14.0.3 Safari/605.1.15	-99
1086	0	0	31	5822659	-77	2266	-77	-77	-99	-99	d	3	11	33	2	2	1	0	0	0	0	-99	6	6	6	6	1	1	6	4	2	2	7	7	6	6	6	4	6	6	5	3	6	5	5	-99	-99	Mozilla/5.0 (Linux; Android 9; LG-H870) AppleWebKit/537.36 (KHTML, like Gecko) Chrome/89.0.4389.105 Mobile Safari/537.36	-99
1087	0	0	32	5822659	-77	-1	-77	-77	-99	-99	d	3	13	29	2	2	1	0	0	0	0	-99	7	7	5	6	2	2	6	4	2	2	7	7	6	6	6	6	5	6	6	5	6	4	4	-99	-99	Mozilla/5.0 (Linux; Android 8.0.0; SAMSUNG SM-G930F) AppleWebKit/537.36 (KHTML, like Gecko) SamsungBrowser/13.2 Chrome/83.0.4103.106 Mobile Safari/537.36	-99
1088	0	0	31	5812245	-77	11	-77	-77	-99	-99	d	1	-66	-66	-77	-77	-77	-77	-77	-77	-77	-66	-77	-77	-77	-77	-77	-77	-77	-77	-77	-77	-77	-77	-77	-77	-77	-77	-77	-77	-77	-77	-77	-77	-77	-66	-66	Mozilla/5.0 (Windows NT 10.0; Win64; x64) AppleWebKit/537.36 (KHTML, like Gecko) Chrome/89.0.4389.90 Safari/537.36	-99
1089	0	0	31	5812245	-77	4	-77	-77	-99	-99	d	4	-66	-66	-77	-77	-77	-77	-77	-77	-77	-66	-77	-77	-77	-77	-77	-77	-77	-77	-77	-77	-77	-77	-77	-77	-77	-77	-77	-77	-77	-77	-77	-77	-77	-66	-66	Mozilla/5.0 (Linux; U; Android 10; ru-ru; Redmi Note 8 Pro Build/QP1A.190711.020) AppleWebKit/537.36 (KHTML, like Gecko) Version/4.0 Chrome/79.0.3945.147 Mobile Safari/537.36 XiaoMi/MiuiBrowser/12.9.3-gn	-99
1090	0	0	31	5822659	-77	726	-77	-77	-99	-99	d	2	7	25	2	2	0	1	0	0	0	-99	7	7	7	1	1	1	1	1	1	1	7	7	7	7	7	7	7	7	7	7	7	7	7	-99	-99	Mozilla/5.0 (iPhone; CPU iPhone OS 12_5_2 like Mac OS X) AppleWebKit/605.1.15 (KHTML, like Gecko) Version/12.1.2 Mobile/15E148 Safari/604.1	https://wm.hrz.uni-giessen.de/horde/imp/smartmobile.php
1092	0	0	31	5822659	-77	994	-77	-77	-99	-99	d	2	6	30	1	2	1	0	0	0	0	-99	7	7	7	7	1	1	1	1	1	1	7	7	7	7	7	7	7	0	7	7	7	7	7	Ein eigenes Fach speziell auf Impfen müsste geschaffen werden. Meine Informationen übers Impfen habe ich mir durch Selbststudium beigebracht, Ich hatte letztes Jahr, Pandemiebedingt, sehr viel Zeit dafür. Die Universität hat da eher wenig übernommen, am ehesten noch in der Risikobestimmung, was ich aber auch selbst bearbeitet habe.	Vielen Dank für die Umfrage. Ich hoffe, es ändert sich etwas. Man merkt, wie wichtig solche Aufklärung ist, bezüglich des Impfens, einer der größten Errungenschaften der modernen Medizin. Und Aufklärung hilft, etwas gegen Impfskepsis zu tun, die auch bei Medizinern verbreitet ist.	Mozilla/5.0 (Windows NT 10.0; Win64; x64; rv:87.0) Gecko/20100101 Firefox/87.0	-99
1091	0	0	31	5822659	-77	1245	-77	-77	-99	-99	d	2	10	25	1	2	1	0	0	0	0	-99	6	4	6	6	1	1	4	1	2	1	6	6	6	5	5	5	5	5	5	5	5	5	5	-99	-99	Mozilla/5.0 (iPhone; CPU iPhone OS 14_4 like Mac OS X) AppleWebKit/605.1.15 (KHTML, like Gecko) Version/14.0.3 Mobile/15E148 Safari/604.1	-99
1093	0	0	31	5822659	-77	847	-77	-77	-99	-99	d	2	9	24	1	2	0	1	0	0	0	-99	4	4	3	3	1	1	3	2	1	1	5	6	0	6	6	6	6	6	6	6	6	4	4	-99	-99	Mozilla/5.0 (Windows NT 10.0; Win64; x64; rv:87.0) Gecko/20100101 Firefox/87.0	-99
1094	0	0	31	5822659	-77	1568	-77	-77	-99	-99	d	2	5	22	2	2	1	0	0	0	0	-99	7	7	5	3	0	0	0	0	0	0	0	0	0	0	0	0	0	0	0	0	0	0	0	-99	-99	Mozilla/5.0 (iPhone; CPU iPhone OS 14_4 like Mac OS X) AppleWebKit/605.1.15 (KHTML, like Gecko) Version/14.0.3 Mobile/15E148 Safari/604.1	-99
1096	0	0	31	5812245	-77	14	-77	-77	-99	-99	d	4	-66	-66	-77	-77	-77	-77	-77	-77	-77	-66	-77	-77	-77	-77	-77	-77	-77	-77	-77	-77	-77	-77	-77	-77	-77	-77	-77	-77	-77	-77	-77	-77	-77	-66	-66	Mozilla/5.0 (iPhone; CPU iPhone OS 14_4_1 like Mac OS X) AppleWebKit/605.1.15 (KHTML, like Gecko) Version/14.0.3 Mobile/15E148 Safari/604.1	-99
1097	0	0	31	5822659	-77	1680	-77	-77	-99	-99	d	2	8	21	2	2	0	1	0	0	0	-99	2	2	2	2	5	2	6	6	5	5	5	5	5	5	5	1	5	6	7	1	2	1	1	-99	-99	Mozilla/5.0 (X11; Linux x86_64) AppleWebKit/537.36 (KHTML, like Gecko) SamsungBrowser/13.2 Chrome/83.0.4103.106 Safari/537.36	-99
1098	0	0	31	5822659	-77	1552	-77	-77	-99	-99	d	2	7	22	2	2	1	0	0	0	0	-99	4	5	5	5	3	2	5	3	2	2	6	6	6	6	4	4	5	5	5	3	5	2	2	-99	-99	Mozilla/5.0 (Windows NT 10.0; Win64; x64) AppleWebKit/537.36 (KHTML, like Gecko) Chrome/89.0.4389.114 Safari/537.36	https://webmail.stud.uni-giessen.de/
1099	0	0	31	5822659	-77	965	-77	-77	-99	-99	d	2	10	24	2	2	1	0	0	0	0	-99	6	4	3	6	1	1	7	4	3	2	7	7	7	7	5	2	6	7	7	1	1	3	3	-99	-99	Mozilla/5.0 (Windows NT 10.0; Win64; x64) AppleWebKit/537.36 (KHTML, like Gecko) Chrome/89.0.4389.90 Safari/537.36 Edg/89.0.774.63	-99
1100	0	0	31	5822659	-77	715	-77	-77	-99	-99	d	2	18	28	2	2	1	0	0	0	0	-99	7	7	2	3	1	1	5	1	2	1	7	7	7	7	7	7	7	7	3	3	7	7	7	-99	-99	Mozilla/5.0 (Windows NT 10.0; Win64; x64) AppleWebKit/537.36 (KHTML, like Gecko) Chrome/89.0.4389.114 Safari/537.36	-99
1101	0	0	31	5822659	-77	631	-77	-77	-99	-99	d	2	10	24	2	2	1	0	0	0	0	-99	7	7	7	6	2	1	6	3	2	2	7	6	6	6	6	6	6	6	4	4	6	5	6	-99	-99	Mozilla/5.0 (Windows NT 10.0; Win64; x64) AppleWebKit/537.36 (KHTML, like Gecko) Chrome/89.0.4389.90 Safari/537.36 Edg/89.0.774.63	https://webmail.stud.uni-giessen.de/
1105	0	0	31	5822659	-77	1800	-77	-77	-99	-99	d	2	8	35	1	2	0	1	0	0	0	-99	4	5	6	6	5	4	5	2	3	2	6	5	5	5	2	3	3	2	2	6	5	2	3	-99	-99	Mozilla/5.0 (iPhone; CPU iPhone OS 14_4_1 like Mac OS X) AppleWebKit/605.1.15 (KHTML, like Gecko) Version/14.0.3 Mobile/15E148 Safari/604.1	-99
1106	0	0	31	5822659	-77	664	-77	-77	-99	-99	d	3	13	26	1	2	1	0	0	0	0	-99	5	4	5	5	4	4	7	7	4	4	7	7	5	4	5	4	5	5	4	4	4	4	3	-99	-99	Mozilla/5.0 (iPhone; CPU iPhone OS 14_4 like Mac OS X) AppleWebKit/605.1.15 (KHTML, like Gecko) Version/14.0.3 Mobile/15E148 Safari/604.1	-99
1107	0	0	31	5822659	-77	998	-77	-77	-99	-99	d	2	6	21	2	2	1	0	0	0	0	-99	5	5	5	4	3	3	3	2	4	3	4	7	4	4	4	4	5	5	5	3	4	3	3	-99	-99	Mozilla/5.0 (Macintosh; Intel Mac OS X 10_15_6) AppleWebKit/605.1.15 (KHTML, like Gecko) Version/13.1.2 Safari/605.1.15	https://student.uniklinikum-leipzig.de/studium/allgemeines_interessantes.php
1108	0	0	31	5822659	-77	1539	-77	-77	-99	-99	d	2	11	26	1	2	1	0	0	0	0	-99	5	5	5	5	1	1	1	1	1	1	7	7	5	5	5	3	5	5	5	3	4	4	4	-99	Die Diskrepanz zwischen aktueller Sorge vor Ansteckung und den doch gering eingeschätzten Sorgen der Infektion kommen daher, dass ich mich in Vorbereitung auf das M2 befinde. Wenn jemand in meiner Umgebung positiv sein sollte, kann ich nicht am M2 teilnehmen.	Mozilla/5.0 (Windows NT 10.0; Win64; x64; rv:87.0) Gecko/20100101 Firefox/87.0	-99
1109	0	0	31	5822659	-77	665	-77	-77	-99	-99	d	2	10	29	1	2	1	0	0	0	0	-99	5	5	5	5	5	5	5	5	5	5	7	6	6	6	3	6	6	6	6	6	6	6	6	-99	-99	Mozilla/5.0 (Windows NT 10.0; Win64; x64) AppleWebKit/537.36 (KHTML, like Gecko) Chrome/89.0.4389.90 Safari/537.36 Edg/89.0.774.63	https://webmail.stud.uni-giessen.de/
1110	0	0	31	5812245	-77	14	-77	-77	-99	-99	d	1	-66	-66	-77	-77	-77	-77	-77	-77	-77	-66	-77	-77	-77	-77	-77	-77	-77	-77	-77	-77	-77	-77	-77	-77	-77	-77	-77	-77	-77	-77	-77	-77	-77	-66	-66	Mozilla/5.0 (iPhone; CPU iPhone OS 14_4_2 like Mac OS X) AppleWebKit/605.1.15 (KHTML, like Gecko) Version/14.0.3 Mobile/15E148 Safari/604.1	-99
1111	0	0	31	5822659	-77	981	-77	-77	-99	-99	d	2	4	21	2	2	1	0	0	0	0	-99	6	6	4	5	1	1	2	1	1	1	7	6	6	6	5	5	6	6	7	7	7	3	3	-99	-99	Mozilla/5.0 (Macintosh; Intel Mac OS X 10_15_4) AppleWebKit/605.1.15 (KHTML, like Gecko) Version/13.1 Safari/605.1.15	-99
1119	0	0	31	5822659	-77	1140	-77	-77	-99	-99	d	2	9	23	2	2	1	0	0	0	0	-99	7	7	7	7	2	2	2	6	1	1	7	7	5	1	1	1	4	3	7	1	4	1	1	-99	-99	Mozilla/5.0 (iPhone; CPU iPhone OS 14_2 like Mac OS X) AppleWebKit/605.1.15 (KHTML, like Gecko) Version/14.0.1 Mobile/15E148 Safari/604.1	https://wm.hrz.uni-giessen.de/horde/imp/smartmobile.php
1113	0	0	31	5812245	-77	9	-77	-77	-99	-99	d	4	-66	-66	-77	-77	-77	-77	-77	-77	-77	-66	-77	-77	-77	-77	-77	-77	-77	-77	-77	-77	-77	-77	-77	-77	-77	-77	-77	-77	-77	-77	-77	-77	-77	-66	-66	Mozilla/5.0 (Macintosh; Intel Mac OS X 10_13_6) AppleWebKit/605.1.15 (KHTML, like Gecko) Version/13.1.2 Safari/605.1.15	-99
1114	0	0	32	5822659	-77	-1	-77	-77	-99	-99	d	2	7	25	2	2	1	0	0	0	0	-99	6	7	6	6	2	1	2	2	2	2	7	7	7	7	6	6	6	6	1	7	1	2	2	-99	-99	Mozilla/5.0 (Linux; Android 10; CLT-L09) AppleWebKit/537.36 (KHTML, like Gecko) Chrome/89.0.4389.105 Mobile Safari/537.36	https://wm.hrz.uni-giessen.de/
1115	0	0	31	5822659	-77	989	-77	-77	-99	-99	d	2	6	30	2	2	1	0	0	0	0	-99	7	7	7	7	1	1	3	1	1	1	7	7	7	7	4	2	7	4	4	4	4	4	4	-99	-99	Mozilla/5.0 (Macintosh; Intel Mac OS X 10_15_7) AppleWebKit/605.1.15 (KHTML, like Gecko) Version/14.0.3 Safari/605.1.15	-99
1116	0	0	31	5822659	-77	1083	-77	-77	-99	-99	d	2	2	23	2	2	0	1	0	0	0	-99	7	7	6	7	3	4	2	2	2	3	6	6	5	5	4	4	5	5	5	3	6	2	2	-99	-99	Mozilla/5.0 (Linux; Android 11; SM-G973F) AppleWebKit/537.36 (KHTML, like Gecko) Chrome/88.0.4324.181 Mobile Safari/537.36 (Ecosia android@88.0.4324.181)	https://wm.hrz.uni-giessen.de/
1117	0	0	31	5822659	-77	1063	-77	-77	-99	-99	d	2	10	28	2	2	1	0	0	0	0	-99	6	6	4	6	1	1	3	3	2	2	7	7	7	7	7	3	7	7	4	4	6	2	2	-99	-99	Mozilla/5.0 (Windows NT 10.0; Win64; x64; rv:87.0) Gecko/20100101 Firefox/87.0	-99
1118	0	0	31	5822659	-77	1881	-77	-77	-99	-99	d	2	2	22	2	2	1	0	0	0	0	-99	3	5	1	2	4	4	4	4	4	4	7	7	7	7	5	7	7	6	4	6	6	4	4	-99	zum Anfang des Studiums kann man zu vielen Fragen keine richtigen Angaben machen	Mozilla/5.0 (Windows NT 10.0; Win64; x64; rv:87.0) Gecko/20100101 Firefox/87.0	-99
1120	0	0	31	5822659	-77	1049	-77	-77	-99	-99	d	2	6	24	2	2	1	0	0	0	0	-99	5	5	4	4	2	2	2	2	2	2	5	4	3	3	2	2	5	3	5	5	4	3	3	-99	-99	Mozilla/5.0 (Linux; Android 8.0.0; PIC-LX9) AppleWebKit/537.36 (KHTML, like Gecko) Chrome/84.0.4147.89 Mobile Safari/537.36	-99
1121	0	0	31	5822659	-77	923	-77	-77	-99	-99	d	2	4	21	2	2	1	0	0	0	0	-99	2	3	2	4	2	2	1	3	1	2	7	7	6	6	6	6	6	3	2	6	2	1	1	-99	-99	Mozilla/5.0 (Macintosh; Intel Mac OS X 10_13_6) AppleWebKit/605.1.15 (KHTML, like Gecko) Version/13.1.2 Safari/605.1.15	https://wm.hrz.uni-giessen.de/horde/imp/dynamic.php?page=mailbox
1122	0	0	31	5822659	-77	754	-77	-77	-99	-99	d	2	4	20	1	2	1	0	0	0	0	-99	5	7	7	7	3	7	4	7	4	4	7	7	7	7	7	7	7	7	3	7	7	7	7	-99	-99	Mozilla/5.0 (iPhone; CPU iPhone OS 14_4 like Mac OS X) AppleWebKit/605.1.15 (KHTML, like Gecko) CriOS/87.0.4280.77 Mobile/15E148 Safari/604.1	-99
1123	0	0	31	5822659	-77	920	-77	-77	-99	-99	d	2	5	21	2	2	0	0	0	0	1	-99	5	6	5	5	2	2	2	2	2	2	7	7	7	7	7	6	7	7	6	6	7	5	5	-99	-99	Mozilla/5.0 (Macintosh; Intel Mac OS X 10_15_7) AppleWebKit/605.1.15 (KHTML, like Gecko) Version/14.0.3 Safari/605.1.15	https://student.uniklinikum-leipzig.de/studium/allgemeines_interessantes.php
1125	0	0	31	5822659	-77	1420	-77	-77	-99	-99	d	2	6	24	2	2	1	0	0	0	0	-99	2	2	2	4	3	3	4	2	2	2	6	6	6	5	5	2	5	5	5	3	6	2	2	-99	-99	Mozilla/5.0 (Linux; Android 9; SAMSUNG SM-G950F) AppleWebKit/537.36 (KHTML, like Gecko) SamsungBrowser/13.2 Chrome/83.0.4103.106 Mobile Safari/537.36	-99
1124	0	0	31	5822659	-77	1258	-77	-77	-99	-99	d	2	4	20	2	2	1	0	0	0	0	-99	4	5	5	3	1	6	1	1	1	1	7	4	4	4	4	4	7	3	4	4	4	4	4	-99	-99	Mozilla/5.0 (Macintosh; Intel Mac OS X 10_15_6) AppleWebKit/605.1.15 (KHTML, like Gecko) Version/14.0.3 Safari/605.1.15	-99
1126	0	0	31	5822659	-77	861	-77	-77	-99	-99	d	2	3	23	1	2	1	0	0	0	0	-99	6	6	5	5	2	2	2	2	2	2	7	7	6	6	5	5	5	6	5	5	5	5	5	-99	-99	Mozilla/5.0 (Macintosh; Intel Mac OS X 10_11_6) AppleWebKit/537.36 (KHTML, like Gecko) Chrome/89.0.4389.90 Safari/537.36	-99
1127	0	0	31	5822659	-77	959	-77	-77	-99	-99	d	2	5	28	2	2	1	0	0	0	0	-99	5	5	1	3	1	2	1	1	2	1	7	7	7	7	7	7	7	7	7	7	7	7	7	-99	-99	Mozilla/5.0 (iPhone; CPU iPhone OS 13_6 like Mac OS X) AppleWebKit/605.1.15 (KHTML, like Gecko) Version/13.1.2 Mobile/15E148 Safari/604.1	-99
1129	0	0	31	5822659	-77	4039	-77	-77	-99	-99	d	2	6	23	2	2	1	1	0	0	0	-99	7	7	6	6	2	2	6	6	6	5	7	7	7	7	7	7	7	6	1	4	5	5	5	-99	-99	Mozilla/5.0 (Macintosh; Intel Mac OS X 10_15_6) AppleWebKit/605.1.15 (KHTML, like Gecko) Version/14.0.3 Safari/605.1.15	-99
1130	0	0	31	5822659	-77	1215	-77	-77	-99	-99	d	2	2	27	2	2	0	1	0	0	0	-99	5	5	2	2	2	2	2	1	1	1	5	5	5	5	4	4	4	4	4	4	4	4	4	-99	Bitte impfen Sie auch die niedrigeren Semester, wir haben auch im Pflegepraktikum viel Corona Kontakte und werden überhaupt nicht geschützt.	Mozilla/5.0 (Macintosh; Intel Mac OS X 10_15_6) AppleWebKit/605.1.15 (KHTML, like Gecko) Version/13.1.2 Safari/605.1.15	-99
1131	0	0	31	5822659	-77	2606	-77	-77	-99	-99	d	2	10	30	1	2	1	0	0	0	0	-99	6	7	6	6	6	6	6	6	5	5	7	5	5	5	5	5	5	5	5	5	5	3	3	-99	-99	Mozilla/5.0 (Android 10; Mobile; rv:87.0) Gecko/87.0 Firefox/87.0	-99
1132	0	0	31	5822659	-77	1497	-77	-77	-99	-99	d	2	13	27	1	2	0	1	0	0	0	-99	6	6	5	5	2	2	5	4	2	1	7	6	7	7	7	6	6	7	6	6	7	6	7	-99	-99	Mozilla/5.0 (Windows NT 10.0; Win64; x64; rv:86.0) Gecko/20100101 Firefox/86.0	-99
1133	0	0	31	5822659	-77	1164	-77	-77	-99	-99	d	2	6	26	2	2	0	0	0	0	1	Studierendenportal	6	7	6	6	2	2	2	2	2	2	7	7	6	5	5	5	6	6	4	4	4	3	3	-99	-99	Mozilla/5.0 (Macintosh; Intel Mac OS X 10_15_6) AppleWebKit/605.1.15 (KHTML, like Gecko) Version/14.0.3 Safari/605.1.15	https://student.uniklinikum-leipzig.de/studium/allgemeines_interessantes.php
1134	0	0	31	5822659	-77	1254	-77	-77	-99	-99	d	2	9	25	1	2	1	0	0	0	0	-99	7	7	5	5	2	1	5	3	2	2	6	5	6	6	5	4	6	6	3	4	4	5	4	-99	-99	Mozilla/5.0 (Linux; Android 7.0; SM-A310F) AppleWebKit/537.36 (KHTML, like Gecko) Chrome/89.0.4389.105 Mobile Safari/537.36	-99
1135	0	0	31	5822659	-77	1220	-77	-77	-99	-99	d	5	2	20	2	2	1	0	0	0	0	-99	1	2	1	1	1	1	1	1	1	1	4	4	4	1	4	2	2	5	2	4	5	2	2	-99	-99	Mozilla/5.0 (iPhone; CPU iPhone OS 11_4_1 like Mac OS X) AppleWebKit/605.1.15 (KHTML, like Gecko) Version/11.0 Mobile/15E148 Safari/604.1	-99
1136	0	0	31	5822659	-77	1081	-77	-77	-99	-99	d	2	3	25	2	2	0	1	0	0	0	-99	4	4	4	3	1	1	4	0	0	0	0	0	0	0	0	0	0	0	0	0	0	0	0	-99	-99	Mozilla/5.0 (iPhone; CPU iPhone OS 14_3 like Mac OS X) AppleWebKit/605.1.15 (KHTML, like Gecko) Version/14.0.2 Mobile/15E148 Safari/604.1	-99
1140	0	0	31	5822659	-77	2205	-77	-77	-99	-99	d	3	18	30	2	2	1	0	0	0	0	-99	6	5	3	3	2	2	6	5	2	3	7	6	6	5	5	5	5	6	4	5	4	3	2	-99	-99	Mozilla/5.0 (Linux; Android 10; FP3) AppleWebKit/537.36 (KHTML, like Gecko) Chrome/89.0.4389.105 Mobile Safari/537.36	-99
1138	0	0	31	5822659	-77	1331	-77	-77	-99	-99	d	5	2	25	1	2	1	0	0	0	0	-99	4	5	3	3	2	1	3	2	2	1	7	6	6	2	2	2	6	6	4	4	4	5	2	-99	-99	Mozilla/5.0 (iPhone; CPU iPhone OS 14_4_2 like Mac OS X) AppleWebKit/605.1.15 (KHTML, like Gecko) Version/14.0.3 Mobile/15E148 Safari/604.1	-99
1139	0	0	31	5822659	-77	943	-77	-77	-99	-99	d	5	3	23	2	2	1	0	0	0	0	-99	6	6	6	6	4	3	3	3	3	3	7	7	7	7	7	7	7	7	7	3	3	4	4	-99	-99	Mozilla/5.0 (iPhone; CPU iPhone OS 14_4_2 like Mac OS X) AppleWebKit/605.1.15 (KHTML, like Gecko) Version/14.0.3 Mobile/15E148 Safari/604.1	-99
1141	0	0	31	5822659	-77	919	-77	-77	-99	-99	d	2	3	26	2	2	1	0	0	0	0	-99	5	5	3	5	0	0	0	0	0	0	7	0	0	0	0	0	0	0	0	0	0	0	0	-99	-99	Mozilla/5.0 (Windows NT 10.0; Win64; x64; rv:87.0) Gecko/20100101 Firefox/87.0	-99
1142	0	0	31	5822659	-77	1484	-77	-77	-99	-99	d	2	10	29	1	2	0	1	0	0	0	-99	2	4	6	6	1	1	5	2	1	2	7	7	2	2	1	2	2	7	7	7	7	4	4	-99	-99	Mozilla/5.0 (Macintosh; Intel Mac OS X 10_15_7) AppleWebKit/605.1.15 (KHTML, like Gecko) Version/14.0.2 Safari/605.1.15	-99
1143	0	0	31	5822659	-77	1036	-77	-77	-99	-99	d	5	2	18	2	2	1	0	0	0	0	-99	2	2	4	4	2	1	1	1	1	1	6	6	6	6	6	6	6	6	6	6	6	6	6	-99	-99	Mozilla/5.0 (Macintosh; Intel Mac OS X 10_15_7) AppleWebKit/605.1.15 (KHTML, like Gecko) Version/14.0.3 Safari/605.1.15	-99
1145	0	0	31	5822659	-77	1931	-77	-77	-99	-99	d	2	2	19	2	3	0	1	0	0	0	-99	5	5	4	4	5	5	5	3	2	3	6	6	6	6	5	5	6	4	5	5	6	4	4	-99	-99	Mozilla/5.0 (Linux; Android 10; Redmi Note 8 Pro Build/QP1A.190711.020; wv) AppleWebKit/537.36 (KHTML, like Gecko) Version/4.0 Chrome/89.0.4389.105 Mobile Safari/537.36 StudoBrowser/4.02.4-android-studo (https://studo.com/studo-browser-information-and-contact)	-99
1146	0	0	31	5822659	-77	909	-77	-77	-99	-99	d	3	12	26	2	2	1	0	0	0	0	-99	4	2	1	3	2	1	1	1	1	1	6	6	7	7	7	7	7	7	4	6	6	4	4	-99	-99	Mozilla/5.0 (Windows NT 10.0; Win64; x64; rv:87.0) Gecko/20100101 Firefox/87.0	https://student.uniklinikum-leipzig.de/
1147	0	0	31	5822659	-77	914	-77	-77	-99	-99	d	2	9	24	2	2	1	0	0	0	0	-99	4	5	3	5	1	1	6	5	1	1	7	7	7	7	7	7	7	7	4	4	7	7	7	-99	-99	Mozilla/5.0 (Windows NT 10.0; Win64; x64; rv:87.0) Gecko/20100101 Firefox/87.0	-99
1148	0	0	31	5822659	-77	1337	-77	-77	-99	-99	d	2	8	24	1	2	1	0	0	0	0	-99	6	6	6	6	3	3	5	3	2	2	7	7	6	7	6	6	7	7	5	6	5	2	2	-99	-99	Mozilla/5.0 (Windows NT 10.0; Win64; x64; rv:87.0) Gecko/20100101 Firefox/87.0	https://wm.hrz.uni-giessen.de/
1149	0	0	31	5822659	-77	769	-77	-77	-99	-99	d	2	8	39	1	2	1	0	0	0	0	-99	7	7	7	7	2	1	4	2	1	3	7	7	7	7	7	7	7	7	7	7	7	6	6	-99	-99	Mozilla/5.0 (Macintosh; Intel Mac OS X 10_15_7) AppleWebKit/537.36 (KHTML, like Gecko) Chrome/89.0.4389.114 Safari/537.36	-99
1150	0	0	31	5822659	-77	3550	-77	-77	-99	-99	d	2	8	23	1	2	1	0	0	0	0	-99	5	5	4	5	1	1	5	4	3	1	6	5	5	4	5	5	5	5	5	4	4	4	4	Das Problem ist, dass das Medizinstudium als solches von sich aus immer ausladender wird und man von daher froh ist, wenn nicht noch 10000 zusätzliche praktische Prüfungen und zusätzliche Veranstaltungen dazu kommen. Wann bitteschön soll man das denn alles unterbringen? Ich hatte am Ende des Vergangenen Semesters 8 Klausuren, von denen 6 Stück ziemlich großen Lernaufwand bedeuteten. Wenn Sie mir …	Es ist schwierig, ohne an konkrete Impfstoffe zu denken, Fragen über die Impfstoffe und ihre Sicherheit zu beantworten.	Mozilla/5.0 (Windows NT 10.0; Win64; x64; rv:87.0) Gecko/20100101 Firefox/87.0	-99
1152	0	0	32	5822659	-77	-1	-77	-77	-99	-99	d	2	5	27	1	2	1	0	0	0	0	-99	4	4	5	5	3	2	2	1	1	1	7	7	7	7	1	3	6	7	4	4	4	1	1	-99	-99	Mozilla/5.0 (iPhone; CPU iPhone OS 14_4 like Mac OS X) AppleWebKit/605.1.15 (KHTML, like Gecko) CriOS/87.0.4280.77 Mobile/15E148 Safari/604.1	-99
1153	0	0	31	5822659	-77	871	-77	-77	-99	-99	d	2	2	23	2	2	1	0	0	0	0	-99	1	1	1	4	1	1	1	1	1	1	7	7	5	6	3	2	6	7	4	4	7	6	6	-99	-99	Mozilla/5.0 (Macintosh; Intel Mac OS X 10_15_6) AppleWebKit/605.1.15 (KHTML, like Gecko) Version/14.0.3 Safari/605.1.15	-99
1154	0	0	31	5822659	-77	1400	-77	-77	-99	-99	d	2	2	27	1	2	1	0	0	0	0	-99	2	5	5	7	4	2	1	1	1	1	6	7	7	5	6	4	6	6	4	6	5	4	4	-99	-99	Mozilla/5.0 (Windows NT 10.0; Win64; x64) AppleWebKit/537.36 (KHTML, like Gecko) Chrome/89.0.4389.90 Safari/537.36 Edg/89.0.774.63	-99
1155	0	0	31	5822659	-77	2144	-77	-77	-99	-99	d	2	6	24	2	2	0	1	0	0	0	-99	6	7	6	4	1	1	2	1	1	1	7	7	7	5	7	7	7	7	1	4	7	2	2	-99	-99	Mozilla/5.0 (Macintosh; Intel Mac OS X 10_10_5) AppleWebKit/537.36 (KHTML, like Gecko) Chrome/87.0.4280.88 Safari/537.36	https://wm.hrz.uni-giessen.de/
1156	0	0	31	5822659	-77	840	-77	-77	-99	-99	d	2	10	26	2	2	0	1	0	0	0	-99	4	7	6	6	1	1	3	1	1	1	7	7	7	7	7	7	7	7	7	7	7	7	7	-99	-99	Mozilla/5.0 (Macintosh; Intel Mac OS X 10_15_6) AppleWebKit/605.1.15 (KHTML, like Gecko) Version/14.0.3 Safari/605.1.15	-99
1157	0	0	31	5822659	-77	2232	-77	-77	-99	-99	d	5	6	25	1	2	0	1	0	0	0	-99	6	6	6	6	4	4	4	1	4	4	6	7	4	3	3	3	5	4	4	6	4	3	3	Man sollte sich intensiver mit den Statistiken und Zahlen hinter der Erkrankung auseinander setzen. Im aktuellen Fall sollte man sich die Sterberate für die Altersgruppen ansehen und die aktuelle Lage des Gesundheitssystems (Zustand der Pflege, Kapazität etc) vor Augen führen. Beim Thema Impfaufklärung sollte man auch kritisch hinterfragen dürfen. Gegenargumente sollten zugelassen und analysiert …	-99	Mozilla/5.0 (iPhone; CPU iPhone OS 14_0_1 like Mac OS X) AppleWebKit/605.1.15 (KHTML, like Gecko) Version/14.0 Mobile/15E148 Safari/604.1	https://wm.hrz.uni-giessen.de/horde/imp/smartmobile.php
1159	0	0	31	5822659	-77	2105	-77	-77	-99	-99	d	2	6	22	2	2	1	0	0	0	0	-99	5	6	5	5	3	2	4	2	2	2	7	6	6	5	4	4	5	4	4	4	4	3	2	-99	-99	Mozilla/5.0 (Linux; Android 10; VOG-L29) AppleWebKit/537.36 (KHTML, like Gecko) Chrome/89.0.4389.105 Mobile Safari/537.36	android-app://com.google.android.gm/
1158	0	0	31	5822659	-77	776	-77	-77	-99	-99	d	2	4	23	1	2	1	0	0	0	0	-99	6	6	4	2	1	1	1	1	1	1	7	7	5	5	1	2	6	3	4	6	4	5	5	-99	-99	Mozilla/5.0 (Linux; Android 10; YAL-L41 Build/HUAWEIYAL-L41; wv) AppleWebKit/537.36 (KHTML, like Gecko) Version/4.0 Chrome/88.0.4324.181 Mobile Safari/537.36 StudoBrowser/4.00.2-android-studo (https://studo.com/studo-browser-information-and-contact)	-99
1160	0	0	31	5822659	-77	1491	-77	-77	-99	-99	d	2	6	23	2	2	1	0	0	0	0	-99	5	7	6	6	1	1	1	1	1	1	6	6	6	6	5	5	6	6	4	4	4	4	4	-99	-99	Mozilla/5.0 (Windows NT 10.0; Win64; x64) AppleWebKit/537.36 (KHTML, like Gecko) Chrome/89.0.4389.90 Safari/537.36 Edg/89.0.774.63	https://webmail.stud.uni-giessen.de/
1241	0	0	31	5822659	-77	1809	-77	-77	-99	-99	d	2	5	26	2	2	1	0	0	0	0	-99	6	6	3	3	2	1	1	1	1	1	7	7	6	6	7	7	7	4	3	6	6	4	4	-99	-99	Mozilla/5.0 (iPhone; CPU iPhone OS 14_4_1 like Mac OS X) AppleWebKit/605.1.15 (KHTML, like Gecko) Version/14.0.3 Mobile/15E148 Safari/604.1	-99
1161	0	0	32	5822659	-77	-1	-77	-77	-99	-99	d	2	3	25	2	2	1	0	0	0	0	-99	4	4	2	3	4	4	4	4	4	4	6	5	5	5	5	5	5	5	5	5	5	2	2	-99	-99	Mozilla/5.0 (Macintosh; Intel Mac OS X 10_15_6) AppleWebKit/605.1.15 (KHTML, like Gecko) Version/14.0.3 Safari/605.1.15	-99
1162	0	0	31	5822659	-77	907	-77	-77	-99	-99	d	2	4	26	2	2	1	0	0	0	0	-99	7	7	6	6	5	5	5	2	2	2	7	7	7	7	7	7	7	7	3	5	3	4	4	-99	-99	Mozilla/5.0 (Windows NT 10.0; Win64; x64; rv:87.0) Gecko/20100101 Firefox/87.0	-99
1163	0	0	31	5822659	-77	698	-77	-77	-99	-99	d	2	3	26	2	2	1	0	0	0	0	-99	1	1	1	1	1	1	1	1	1	1	2	6	3	3	4	1	6	3	1	7	4	1	1	-99	-99	Mozilla/5.0 (Windows NT 10.0; Win64; x64) AppleWebKit/537.36 (KHTML, like Gecko) Chrome/89.0.4389.90 Safari/537.36	https://wm.hrz.uni-giessen.de/
1164	0	0	31	5822659	-77	1240	-77	-77	-99	-99	d	2	10	25	1	2	1	0	0	0	0	-99	6	6	6	6	5	5	6	5	6	4	7	6	5	6	3	6	5	6	6	5	6	5	5	-99	-99	Mozilla/5.0 (iPhone; CPU iPhone OS 14_4_2 like Mac OS X) AppleWebKit/605.1.15 (KHTML, like Gecko) Version/14.0.3 Mobile/15E148 Safari/604.1	-99
1165	0	0	31	5822659	-77	1174	-77	-77	-99	-99	d	2	2	20	2	2	1	0	0	0	0	-99	2	2	1	2	2	1	1	1	1	1	5	6	6	5	6	4	6	6	4	4	4	3	3	-99	-99	Mozilla/5.0 (Windows NT 10.0; Win64; x64) AppleWebKit/537.36 (KHTML, like Gecko) Chrome/89.0.4389.114 Safari/537.36	https://wm.hrz.uni-giessen.de/
1166	0	0	31	5822659	-77	854	-77	-77	-99	-99	d	5	4	18	2	2	1	1	0	0	0	-99	7	1	1	1	1	1	1	1	1	1	7	7	7	5	4	4	4	7	7	7	7	1	4	-99	-99	Mozilla/5.0 (iPhone; CPU iPhone OS 14_4_2 like Mac OS X) AppleWebKit/605.1.15 (KHTML, like Gecko) Version/14.0.3 Mobile/15E148 Safari/604.1	-99
1168	0	0	31	5822659	-77	867	-77	-77	-99	-99	d	2	5	21	2	2	1	0	0	0	0	-99	4	4	4	4	2	2	2	2	2	2	5	5	5	5	5	5	5	5	5	5	5	5	5	-99	-99	Mozilla/5.0 (Windows NT 10.0; Win64; x64) AppleWebKit/537.36 (KHTML, like Gecko) Chrome/89.0.4389.114 Safari/537.36	https://webmail.stud.uni-giessen.de/
1169	0	0	31	5812245	-77	23	-77	-77	-99	-99	d	1	-66	-66	-77	-77	-77	-77	-77	-77	-77	-66	-77	-77	-77	-77	-77	-77	-77	-77	-77	-77	-77	-77	-77	-77	-77	-77	-77	-77	-77	-77	-77	-77	-77	-66	-66	Mozilla/5.0 (Windows NT 6.3; Win64; x64; rv:82.0) Gecko/20100101 Firefox/82.0	https://wm.hrz.uni-giessen.de/
1170	0	0	31	5822659	-77	715	-77	-77	-99	-99	d	2	4	19	2	2	1	0	0	0	0	-99	6	6	4	5	0	0	0	0	0	0	7	7	7	7	6	6	7	7	7	7	4	4	4	-99	-99	Mozilla/5.0 (Windows NT 10.0; Win64; x64) AppleWebKit/537.36 (KHTML, like Gecko) Chrome/89.0.4389.90 Safari/537.36	https://student.uniklinikum-leipzig.de/
1171	0	0	31	5822659	-77	1247	-77	-77	-99	-99	d	2	5	29	1	2	1	0	0	0	0	-99	5	5	5	4	4	4	4	4	4	4	7	5	5	5	4	5	5	5	5	4	6	3	3	-99	-99	Mozilla/5.0 (Linux; Android 7.0; SM-A510F) AppleWebKit/537.36 (KHTML, like Gecko) Chrome/88.0.4324.181 Mobile Safari/537.36	https://wm.hrz.uni-giessen.de/
1172	0	0	31	5822659	-77	948	-77	-77	-99	-99	d	5	2	24	2	2	1	0	0	0	0	-99	5	5	3	3	2	2	2	2	0	0	0	0	0	0	0	0	0	0	0	0	0	0	0	-99	-99	Mozilla/5.0 (Macintosh; Intel Mac OS X 10_15_6) AppleWebKit/605.1.15 (KHTML, like Gecko) Version/14.0.3 Safari/605.1.15	https://wm.hrz.uni-giessen.de/horde/imp/dynamic.php?page=mailbox
1173	0	0	31	5822659	-77	687	-77	-77	-99	-99	d	5	2	24	2	2	1	0	0	0	0	-99	7	7	4	5	1	1	1	1	1	1	7	7	7	7	7	7	7	7	4	3	6	6	6	-99	-99	Mozilla/5.0 (Windows NT 10.0; Win64; x64) AppleWebKit/537.36 (KHTML, like Gecko) Chrome/89.0.4389.90 Safari/537.36	https://wm.hrz.uni-giessen.de/
1174	0	0	32	5822659	-77	-1	-77	-77	-99	-99	d	2	5	26	2	2	1	0	0	0	0	-99	6	6	6	6	2	2	1	1	1	1	7	7	7	6	7	7	7	7	7	7	7	6	6	-99	-99	Mozilla/5.0 (Windows NT 10.0; Win64; x64) AppleWebKit/537.36 (KHTML, like Gecko) Chrome/89.0.4389.90 Safari/537.36	-99
1175	0	0	31	5822659	-77	1149	-77	-77	-99	-99	d	3	12	30	1	2	1	0	0	0	0	-99	7	7	7	7	1	1	4	4	2	1	6	4	4	4	1	1	1	1	1	1	1	1	1	-99	-99	Mozilla/5.0 (Macintosh; Intel Mac OS X 10_15_7) AppleWebKit/605.1.15 (KHTML, like Gecko) Version/14.0 Safari/605.1.15	-99
1177	0	0	31	5822659	-77	804	-77	-77	-99	-99	d	2	9	24	2	2	1	0	0	0	0	-99	6	7	5	4	1	1	5	7	5	3	6	5	6	7	7	2	6	5	4	4	4	2	2	-99	-99	Mozilla/5.0 (Windows NT 10.0; Win64; x64) AppleWebKit/537.36 (KHTML, like Gecko) Chrome/89.0.4389.90 Safari/537.36	-99
1178	0	0	31	5822659	-77	1558	-77	-77	-99	-99	d	2	6	30	1	2	1	0	0	0	0	-99	6	7	7	7	1	1	1	1	1	1	5	5	5	5	4	4	5	4	2	6	3	3	3	-99	-99	Mozilla/5.0 (Macintosh; Intel Mac OS X 10_15_6) AppleWebKit/605.1.15 (KHTML, like Gecko) Version/14.0.3 Safari/605.1.15	-99
1179	0	0	31	5822659	-77	694	-77	-77	-99	-99	d	2	4	25	2	2	1	0	0	0	0	-99	6	6	5	5	2	1	1	1	1	1	7	7	7	7	7	7	7	7	3	7	7	7	7	-99	-99	Mozilla/5.0 (Windows NT 10.0; Win64; x64) AppleWebKit/537.36 (KHTML, like Gecko) Chrome/89.0.4389.90 Safari/537.36	https://wm.hrz.uni-giessen.de/
1180	0	0	31	5822659	-77	1482	-77	-77	-99	-99	d	2	3	26	1	2	0	1	0	0	0	-99	4	6	6	5	4	4	4	4	4	4	7	4	4	4	4	4	4	4	4	4	4	4	4	-99	-99	Mozilla/5.0 (Android 10; Mobile; rv:87.0) Gecko/87.0 Firefox/87.0	-99
1182	0	0	31	5822659	-77	1253	-77	-77	-99	-99	d	2	8	23	1	2	1	1	0	0	0	-99	4	4	2	4	4	2	4	2	1	2	6	6	5	2	3	4	3	4	1	6	2	1	1	-99	-99	Mozilla/5.0 (iPhone; CPU iPhone OS 14_3 like Mac OS X) AppleWebKit/605.1.15 (KHTML, like Gecko) Version/14.0.2 Mobile/15E148 Safari/604.1	-99
1181	0	0	31	5822659	-77	1240	-77	-77	-99	-99	d	5	7	42	2	2	1	0	0	0	0	-99	7	7	7	7	4	4	4	4	4	4	7	7	7	7	7	7	7	7	7	4	5	4	4	-99	-99	Mozilla/5.0 (Linux; Android 6.0.1; SM-N910F) AppleWebKit/537.36 (KHTML, like Gecko) Chrome/88.0.4324.93 Mobile Safari/537.36	-99
1184	0	0	32	5822659	-77	-1	-77	-77	-99	-99	d	2	5	35	1	2	1	0	0	0	0	-99	4	6	6	7	2	2	2	2	2	2	7	7	6	5	3	3	4	4	4	4	4	4	4	-99	-99	Mozilla/5.0 (iPhone; CPU iPhone OS 14_4 like Mac OS X) AppleWebKit/605.1.15 (KHTML, like Gecko) CriOS/87.0.4280.77 Mobile/15E148 Safari/604.1	-99
1187	0	0	31	5822659	-77	1353	-77	-77	-99	-99	d	2	5	21	2	2	1	0	0	0	0	-99	5	3	4	6	4	4	1	1	1	1	6	6	7	6	7	6	7	7	2	7	3	2	2	-99	-99	Mozilla/5.0 (Windows NT 10.0; Win64; x64) AppleWebKit/537.36 (KHTML, like Gecko) Chrome/89.0.4389.90 Safari/537.36 Edg/89.0.774.63	https://wm.hrz.uni-giessen.de/
1186	0	0	31	5822659	-77	1517	-77	-77	-99	-99	d	2	8	24	2	2	1	0	0	0	0	-99	5	3	3	4	1	1	1	1	1	1	7	7	7	7	7	7	7	7	7	7	7	5	5	-99	-99	Mozilla/5.0 (Linux; Android 10; FP3) AppleWebKit/537.36 (KHTML, like Gecko) Chrome/88.0.4324.181 Mobile Safari/537.36 (Ecosia android@88.0.4324.181)	https://webmail.stud.uni-giessen.de/
1188	0	0	31	5822659	-77	1028	-77	-77	-99	-99	d	2	10	29	1	2	1	0	0	0	0	-99	7	6	5	5	2	2	7	5	3	4	4	4	1	1	1	5	2	2	1	5	1	1	1	-99	-99	Mozilla/5.0 (iPhone; CPU iPhone OS 14_4_1 like Mac OS X) AppleWebKit/605.1.15 (KHTML, like Gecko) Version/14.0.3 Mobile/15E148 Safari/604.1	-99
1189	0	0	31	5822659	-77	1987	-77	-77	-99	-99	d	2	9	23	2	2	1	0	0	0	0	-99	7	6	4	4	1	1	1	1	1	1	6	7	7	7	7	3	7	7	7	1	1	7	7	-99	-99	Mozilla/5.0 (Linux; Android 11; SM-A505FN) AppleWebKit/537.36 (KHTML, like Gecko) Chrome/89.0.4389.105 Mobile Safari/537.36	-99
1190	0	0	31	5812245	-77	9	-77	-77	-99	-99	d	1	-66	-66	-77	-77	-77	-77	-77	-77	-77	-66	-77	-77	-77	-77	-77	-77	-77	-77	-77	-77	-77	-77	-77	-77	-77	-77	-77	-77	-77	-77	-77	-77	-77	-66	-66	Mozilla/5.0 (Macintosh; Intel Mac OS X 10_15_6) AppleWebKit/605.1.15 (KHTML, like Gecko) Version/14.0.3 Safari/605.1.15	-99
1191	0	0	31	5822659	-77	988	-77	-77	-99	-99	d	2	6	21	2	2	0	1	0	0	0	-99	5	5	5	5	3	1	2	1	5	1	5	6	3	5	5	5	5	5	3	4	4	4	5	-99	-99	Mozilla/5.0 (Windows NT 10.0; Win64; x64; rv:87.0) Gecko/20100101 Firefox/87.0	https://deref-gmx.net/
1192	0	0	31	5822659	-77	1337	-77	-77	-99	-99	d	2	6	21	2	2	0	1	0	0	0	-99	5	6	5	4	4	3	7	6	3	3	6	6	6	5	5	5	4	0	4	4	4	4	4	-99	-99	Mozilla/5.0 (Windows NT 10.0; Win64; x64) AppleWebKit/537.36 (KHTML, like Gecko) Chrome/89.0.4389.114 Safari/537.36	https://wm.hrz.uni-giessen.de/
1193	0	0	31	5822659	-77	1045	-77	-77	-99	-99	d	2	9	23	2	2	1	0	0	0	0	-99	5	4	3	6	4	1	7	4	4	2	7	4	6	6	2	2	5	1	4	4	4	1	1	-99	-99	Mozilla/5.0 (Macintosh; Intel Mac OS X 10_15_6) AppleWebKit/605.1.15 (KHTML, like Gecko) Version/14.0.3 Safari/605.1.15	-99
1195	0	0	31	5822659	-77	1291	-77	-77	-99	-99	d	2	2	21	2	2	1	0	0	0	0	-99	5	5	4	4	5	4	4	1	1	1	7	6	7	7	7	5	7	7	7	3	4	4	4	-99	-99	Mozilla/5.0 (Macintosh; Intel Mac OS X 10_15_6) AppleWebKit/605.1.15 (KHTML, like Gecko) Version/13.1.2 Safari/605.1.15	-99
1194	0	0	31	5822659	-77	1070	-77	-77	-99	-99	d	5	7	27	2	2	1	0	0	0	0	-99	5	6	4	6	1	1	1	1	1	1	7	7	7	7	7	7	7	7	7	7	7	5	5	-99	-99	Mozilla/5.0 (Linux; Android 10; YAL-L21) AppleWebKit/537.36 (KHTML, like Gecko) Chrome/89.0.4389.105 Mobile Safari/537.36	https://wm.hrz.uni-giessen.de/
1196	0	0	31	5822659	-77	1015	-77	-77	-99	-99	d	2	5	20	2	2	1	0	0	0	0	-99	4	4	3	3	5	5	2	2	2	5	7	7	7	6	5	5	6	5	4	4	5	6	6	-99	-99	Mozilla/5.0 (Macintosh; Intel Mac OS X 10_15_7) AppleWebKit/605.1.15 (KHTML, like Gecko) Version/14.0.1 Safari/605.1.15	-99
1197	0	0	31	5822659	-77	1156	-77	-77	-99	-99	d	2	5	26	2	2	0	1	0	0	0	-99	2	5	5	5	1	1	1	2	1	1	7	7	7	6	7	6	7	6	7	5	6	5	5	-99	-99	Mozilla/5.0 (Macintosh; Intel Mac OS X 10_15_6) AppleWebKit/605.1.15 (KHTML, like Gecko) Version/14.0.3 Safari/605.1.15	-99
1198	0	0	31	5822659	-77	1276	-77	-77	-99	-99	d	2	7	30	2	2	1	0	0	0	0	-99	5	6	3	7	1	1	5	6	3	1	7	7	7	5	5	6	6	7	3	6	4	4	4	-99	-99	Mozilla/5.0 (iPhone; CPU iPhone OS 14_4_1 like Mac OS X) AppleWebKit/605.1.15 (KHTML, like Gecko) Version/14.0.3 Mobile/15E148 Safari/604.1	-99
1199	0	0	31	5822659	-77	1003	-77	-77	-99	-99	d	2	2	19	2	2	1	0	0	0	0	-99	4	5	2	2	5	5	1	1	1	1	7	7	6	5	5	5	4	5	4	4	4	2	2	-99	-99	Mozilla/5.0 (Macintosh; Intel Mac OS X 10_15_6) AppleWebKit/605.1.15 (KHTML, like Gecko) Version/14.0.1 Safari/605.1.15	-99
1200	0	0	31	5822659	-77	850	-77	-77	-99	-99	d	2	8	28	1	2	1	1	0	0	0	-99	5	7	5	5	5	5	6	6	6	4	7	7	6	6	6	4	5	4	5	3	4	4	4	-99	-99	Mozilla/5.0 (Windows NT 10.0; Win64; x64; rv:87.0) Gecko/20100101 Firefox/87.0	https://wm.hrz.uni-giessen.de/
1201	0	0	31	5822659	-77	1481	-77	-77	-99	-99	d	2	7	23	2	2	1	0	0	0	0	-99	5	4	3	5	2	1	6	6	2	1	7	7	7	7	7	7	7	7	4	4	4	6	6	-99	-99	Mozilla/5.0 (iPad; CPU OS 14_4 like Mac OS X) AppleWebKit/605.1.15 (KHTML, like Gecko) CriOS/87.0.4280.77 Mobile/15E148 Safari/604.1	https://wm.hrz.uni-giessen.de/horde/imp/smartmobile.php
1202	0	0	31	5822659	-77	1458	-77	-77	-99	-99	d	2	8	23	2	2	1	0	0	0	0	-99	7	7	5	5	1	1	2	1	1	1	7	7	7	7	5	4	7	7	4	4	4	2	2	-99	-99	Mozilla/5.0 (Windows NT 10.0; Win64; x64; rv:87.0) Gecko/20100101 Firefox/87.0	-99
1203	0	0	31	5822659	-77	2877	-77	-77	-99	-99	d	2	2	27	2	2	0	0	0	0	1	Email-Verteiler des Studienbüros Vorklinik	6	1	2	5	2	5	2	1	1	1	5	4	3	2	1	1	3	3	1	4	5	1	1	-99	-99	Mozilla/5.0 (Android 10; Mobile; rv:68.0) Gecko/68.0 Firefox/68.0	-99
1204	0	0	31	5822659	-77	1211	-77	-77	-99	-99	d	2	7	23	2	2	0	1	0	0	0	-99	7	7	7	5	2	1	6	3	2	1	7	7	7	7	7	7	7	7	7	4	7	4	5	-99	-99	Mozilla/5.0 (iPhone; CPU iPhone OS 14_0_1 like Mac OS X) AppleWebKit/605.1.15 (KHTML, like Gecko) Version/14.0 Mobile/15E148 Safari/604.1	-99
1205	0	0	31	5822659	-77	836	-77	-77	-99	-99	d	2	2	23	2	2	1	0	0	0	0	-99	3	2	2	2	4	4	4	4	4	4	5	5	5	5	5	5	5	5	3	3	5	5	5	-99	-99	Mozilla/5.0 (Macintosh; Intel Mac OS X 10_15_6) AppleWebKit/605.1.15 (KHTML, like Gecko) Version/14.0.3 Safari/605.1.15	https://wm.hrz.uni-giessen.de/horde/imp/dynamic.php?page=mailbox
1206	0	0	31	5822659	-77	906	-77	-77	-99	-99	d	2	5	20	1	2	1	0	0	0	0	-99	6	2	2	2	0	0	0	0	0	0	0	0	0	0	0	0	0	0	0	0	0	0	0	-99	-99	Mozilla/5.0 (Windows NT 10.0; Win64; x64) AppleWebKit/537.36 (KHTML, like Gecko) Chrome/89.0.4389.90 Safari/537.36 Edg/89.0.774.63	https://webmail.stud.uni-giessen.de/
1207	0	0	31	5822659	-77	1024	-77	-77	-99	-99	d	2	5	22	2	2	1	0	0	0	0	-99	2	2	1	5	2	1	1	1	1	2	7	7	5	5	3	2	5	5	3	4	5	3	3	-99	-99	Mozilla/5.0 (Windows NT 10.0; Win64; x64) AppleWebKit/537.36 (KHTML, like Gecko) Chrome/89.0.4389.114 Safari/537.36	https://wm.hrz.uni-giessen.de/
1208	0	0	31	5812245	-77	22	-77	-77	-99	-99	d	1	-66	-66	-77	-77	-77	-77	-77	-77	-77	-66	-77	-77	-77	-77	-77	-77	-77	-77	-77	-77	-77	-77	-77	-77	-77	-77	-77	-77	-77	-77	-77	-77	-77	-66	-66	Mozilla/5.0 (Windows NT 10.0; Win64; x64) AppleWebKit/537.36 (KHTML, like Gecko) Chrome/89.0.4389.90 Safari/537.36 Edg/89.0.774.63	-99
1209	0	0	31	5822659	-77	2471	-77	-77	-99	-99	d	2	2	19	2	2	0	1	0	0	0	-99	3	2	2	2	0	0	0	0	0	0	7	6	6	5	6	5	6	5	4	5	7	2	2	-99	-99	Mozilla/5.0 (Macintosh; Intel Mac OS X 10_15_6) AppleWebKit/605.1.15 (KHTML, like Gecko) Version/14.0.3 Safari/605.1.15	-99
1210	0	0	31	5822659	-77	970	-77	-77	-99	-99	d	2	4	23	1	2	1	0	0	0	0	-99	6	7	6	3	2	2	2	2	2	2	6	5	4	5	4	4	6	5	6	5	5	1	1	-99	-99	Mozilla/5.0 (Macintosh; Intel Mac OS X 10_15_6) AppleWebKit/605.1.15 (KHTML, like Gecko) Version/14.0.1 Safari/605.1.15	https://wm.hrz.uni-giessen.de/horde/imp/dynamic.php?page=mailbox
1212	0	0	31	5812245	-77	14	-77	-77	-99	-99	d	1	-66	-66	-77	-77	-77	-77	-77	-77	-77	-66	-77	-77	-77	-77	-77	-77	-77	-77	-77	-77	-77	-77	-77	-77	-77	-77	-77	-77	-77	-77	-77	-77	-77	-66	-66	Mozilla/5.0 (iPhone; CPU iPhone OS 14_4_2 like Mac OS X) AppleWebKit/605.1.15 (KHTML, like Gecko) Version/14.0.3 Mobile/15E148 Safari/604.1	-99
1213	0	0	31	5822659	-77	1220	-77	-77	-99	-99	d	2	9	25	2	2	1	0	0	0	0	-99	5	5	2	2	1	1	3	3	1	1	7	7	7	7	4	3	6	6	6	2	2	2	2	-99	-99	Mozilla/5.0 (Macintosh; Intel Mac OS X 10_15_6) AppleWebKit/605.1.15 (KHTML, like Gecko) Version/14.0.3 Safari/605.1.15	https://webmail.stud.uni-giessen.de/horde/imp/dynamic.php?page=mailbox
1214	0	0	31	5812245	-77	10	-77	-77	-99	-99	d	1	-66	-66	-77	-77	-77	-77	-77	-77	-77	-66	-77	-77	-77	-77	-77	-77	-77	-77	-77	-77	-77	-77	-77	-77	-77	-77	-77	-77	-77	-77	-77	-77	-77	-66	-66	Mozilla/5.0 (iPhone; CPU iPhone OS 14_4 like Mac OS X) AppleWebKit/605.1.15 (KHTML, like Gecko) Version/14.0.3 Mobile/15E148 Safari/604.1	-99
1215	0	0	31	5812245	-77	8	-77	-77	-99	-99	d	1	-66	-66	-77	-77	-77	-77	-77	-77	-77	-66	-77	-77	-77	-77	-77	-77	-77	-77	-77	-77	-77	-77	-77	-77	-77	-77	-77	-77	-77	-77	-77	-77	-77	-66	-66	Mozilla/5.0 (iPhone; CPU iPhone OS 14_4_2 like Mac OS X) AppleWebKit/605.1.15 (KHTML, like Gecko) Version/14.0.3 Mobile/15E148 Safari/604.1	https://wm.hrz.uni-giessen.de/horde/imp/smartmobile.php
1216	0	0	31	5812245	-77	8	-77	-77	-99	-99	d	1	-66	-66	-77	-77	-77	-77	-77	-77	-77	-66	-77	-77	-77	-77	-77	-77	-77	-77	-77	-77	-77	-77	-77	-77	-77	-77	-77	-77	-77	-77	-77	-77	-77	-66	-66	Mozilla/5.0 (Macintosh; Intel Mac OS X 10_14_6) AppleWebKit/605.1.15 (KHTML, like Gecko) Version/12.1.2 Safari/605.1.15	https://wm.hrz.uni-giessen.de/horde/imp/dynamic.php?page=mailbox
1219	0	0	31	5822659	-77	1781	-77	-77	-99	-99	d	5	3	27	2	2	1	0	0	0	0	-99	7	7	7	5	2	2	2	2	2	2	6	6	6	6	6	6	6	6	4	4	4	4	4	-99	-99	Mozilla/5.0 (Macintosh; Intel Mac OS X 10_15_6) AppleWebKit/605.1.15 (KHTML, like Gecko) Version/14.0.3 Safari/605.1.15	-99
1218	0	0	31	5822659	-77	1680	-77	-77	-99	-99	d	2	4	24	2	2	1	0	0	0	0	-99	5	5	4	4	2	1	1	1	1	1	7	7	7	6	3	4	6	4	4	2	4	4	4	-99	-99	Mozilla/5.0 (Windows NT 10.0) AppleWebKit/537.36 (KHTML, like Gecko) Chrome/89.0.4389.90 Safari/537.36 Edg/89.0.774.63	https://webmail.stud.uni-giessen.de/
1220	0	0	31	5822659	-77	1515	-77	-77	-99	-99	d	2	4	23	2	3	1	1	0	0	0	-99	7	7	5	6	4	4	4	2	2	2	7	7	5	7	5	4	4	6	6	3	5	4	4	-99	-99	Mozilla/5.0 (iPhone; CPU iPhone OS 14_4_1 like Mac OS X) AppleWebKit/605.1.15 (KHTML, like Gecko) Mobile/15E148 StudoBrowser/4.02.3-ios-studo (https://studo.com/studo-browser-information-and-contact)	-99
1221	0	0	31	5822659	-77	2146	-77	-77	-99	-99	d	2	7	30	1	2	1	0	0	0	0	-99	7	7	7	7	6	6	6	5	5	4	7	7	7	7	7	7	7	7	4	4	7	7	7	Mehr Aufklärung darüber, was man zu den Argumenten von Impfskeptikern entgegnen kann. Teilweise gibt es ja so Halbwahrheiten , die sogar von manchen Ärzten verbreitet werden, z.B. die Grippeimpfung verhindere die Ausbildung einer Subtypenimmunität und deshalb erkrankten Geimpfte z.T. stärker an Varianten, die die Impfung nicht abdeckt. Das war sowas, wo ich ehrlicherweise nicht viel zu sagen konn…	-99	Mozilla/5.0 (Windows NT 10.0; Win64; x64; rv:87.0) Gecko/20100101 Firefox/87.0	https://deref-web.de/
1224	0	0	31	5822659	-77	847	-77	-77	-99	-99	d	2	1	23	2	2	1	0	0	0	0	-99	4	3	3	3	4	4	4	4	4	4	7	5	5	6	6	3	6	6	6	1	1	3	3	-99	-99	Mozilla/5.0 (Macintosh; Intel Mac OS X 10_15_6) AppleWebKit/605.1.15 (KHTML, like Gecko) Version/14.0.1 Safari/605.1.15	-99
1225	0	0	31	5822659	-77	2389	-77	-77	-99	-99	d	5	6	22	2	2	1	0	0	0	0	-99	5	5	4	5	1	1	1	1	1	1	6	6	6	4	4	4	4	6	2	6	2	3	2	-99	Die 15 Minuten haben nicht gereicht.	Mozilla/5.0 (Macintosh; Intel Mac OS X 10_15_6) AppleWebKit/605.1.15 (KHTML, like Gecko) Version/14.0.3 Safari/605.1.15	-99
1226	0	0	31	5812245	-77	17	-77	-77	-99	-99	d	1	-66	-66	-77	-77	-77	-77	-77	-77	-77	-66	-77	-77	-77	-77	-77	-77	-77	-77	-77	-77	-77	-77	-77	-77	-77	-77	-77	-77	-77	-77	-77	-77	-77	-66	-66	Mozilla/5.0 (iPhone; CPU iPhone OS 14_4 like Mac OS X) AppleWebKit/605.1.15 (KHTML, like Gecko) Version/14.0.3 Mobile/15E148 Safari/604.1	-99
1227	0	0	31	5822659	-77	1198	-77	-77	-99	-99	d	2	7	27	2	2	1	0	0	0	0	-99	1	1	1	1	1	1	1	1	1	1	7	6	6	6	6	3	6	6	6	5	6	2	2	-99	-99	Mozilla/5.0 (Macintosh; Intel Mac OS X 10_15_7) AppleWebKit/605.1.15 (KHTML, like Gecko) Version/14.0.1 Safari/605.1.15	-99
1228	0	0	31	5822659	-77	2260	-77	-77	-99	-99	d	2	4	23	2	2	1	0	0	0	0	-99	7	7	5	5	2	2	3	1	1	1	7	7	7	5	5	4	5	4	4	4	4	4	4	-99	Ich habe eine gerinnungsneigende Vererbung und deshalb leichte Skepsis bzgl. Astrazeneca-Impfstoff.	Mozilla/5.0 (iPhone; CPU iPhone OS 14_4_2 like Mac OS X) AppleWebKit/605.1.15 (KHTML, like Gecko) Version/14.0.3 Mobile/15E148 Safari/604.1	-99
1229	0	0	31	5822659	-77	826	-77	-77	-99	-99	d	2	5	22	2	2	1	0	0	0	0	-99	5	5	5	5	1	1	1	1	1	1	0	0	0	0	0	0	0	0	0	0	0	0	0	-99	-99	Mozilla/5.0 (Windows NT 10.0; Win64; x64) AppleWebKit/537.36 (KHTML, like Gecko) Chrome/89.0.4389.114 Safari/537.36	-99
1232	0	0	32	5822659	-77	-1	-77	-77	-99	-99	d	3	12	24	2	2	1	0	0	0	0	-99	6	5	6	6	5	5	6	5	4	2	7	7	7	6	5	4	6	7	4	4	6	3	3	-99	-99	Mozilla/5.0 (Windows NT 10.0; Win64; x64) AppleWebKit/537.36 (KHTML, like Gecko) Chrome/89.0.4389.90 Safari/537.36	-99
1233	0	0	31	5822659	-77	483	-77	-77	-99	-99	d	2	6	21	2	2	1	0	0	0	0	-99	7	7	6	5	5	5	7	6	5	4	7	4	4	7	5	4	7	5	5	4	6	7	7	-99	-99	Mozilla/5.0 (Macintosh; Intel Mac OS X 10_15_6) AppleWebKit/605.1.15 (KHTML, like Gecko) Version/14.0.3 Safari/605.1.15	-99
1235	0	0	31	5822659	-77	988	-77	-77	-99	-99	d	2	7	25	1	2	1	0	0	0	0	-99	6	4	6	6	2	2	5	2	2	2	7	7	7	7	7	7	7	7	7	7	7	7	7	-99	-99	Mozilla/5.0 (Windows NT 10.0; Win64; x64; rv:87.0) Gecko/20100101 Firefox/87.0	https://webmail.stud.uni-giessen.de/
1236	0	0	31	5822659	-77	1201	-77	-77	-99	-99	d	2	8	23	2	2	1	0	0	0	0	-99	7	7	6	6	1	1	3	1	1	1	7	7	7	7	7	4	7	7	5	3	2	5	5	Patientengespräche simulieren, Pro und Contra erarbeiten, Impfstoffe mit Namen, möglichen Nebenwirkungen und Nutzen vermitteln, Impfschemata erlernen (Bedeutung der STIKO etc.)	Gute Umfrage zu wichtigem Thema, dem leider erst durch die Pandemie Beachtung geschenkt wird!	Mozilla/5.0 (iPhone; CPU iPhone OS 14_4_1 like Mac OS X) AppleWebKit/605.1.15 (KHTML, like Gecko) Version/14.0.3 Mobile/15E148 Safari/604.1	-99
1240	0	0	31	5822659	-77	1216	-77	-77	-99	-99	d	2	3	21	1	2	0	1	0	0	0	-99	7	7	7	7	2	1	1	1	1	2	7	6	7	7	7	7	7	7	7	7	7	4	4	-99	-99	Mozilla/5.0 (Linux; Android 11; SM-G781B Build/RP1A.200720.012; wv) AppleWebKit/537.36 (KHTML, like Gecko) Version/4.0 Chrome/89.0.4389.105 Mobile Safari/537.36 EdgW/1.0	-99
1238	0	0	31	5822659	-77	2538	-77	-77	-99	-99	d	5	3	24	2	2	1	0	0	0	0	-99	5	5	5	3	2	1	1	1	1	1	7	7	7	6	6	4	6	0	7	3	4	3	2	-99	-99	Mozilla/5.0 (Linux; Android 9; ZTE A2019G Pro Build/PKQ1.181203.001; wv) AppleWebKit/537.36 (KHTML, like Gecko) Version/4.0 Chrome/89.0.4389.105 Mobile Safari/537.36 StudoBrowser/4.02.4-android-studo (https://studo.com/studo-browser-information-and-contact)	-99
1363	0	0	31	5822659	-77	617	-77	-77	-99	-99	d	5	1	22	2	2	0	1	0	0	0	-99	7	4	4	7	3	2	2	2	2	2	3	7	7	7	7	7	7	7	7	7	7	7	7	-99	-99	Mozilla/5.0 (Windows NT 10.0; Win64; x64) AppleWebKit/537.36 (KHTML, like Gecko) Chrome/89.0.4389.90 Safari/537.36	-99
1242	0	0	31	5822659	-77	2555	-77	-77	-99	-99	d	2	9	27	2	2	1	0	0	0	0	-99	6	6	6	6	3	3	6	6	3	3	7	7	5	5	4	4	5	5	4	4	4	2	2	-99	-99	Mozilla/5.0 (Windows NT 10.0; Win64; x64) AppleWebKit/537.36 (KHTML, like Gecko) Chrome/89.0.4389.90 Safari/537.36 Edg/89.0.774.57	-99
1243	0	0	31	5822659	-77	950	-77	-77	-99	-99	d	2	6	29	2	2	0	1	0	0	0	-99	2	1	1	1	1	1	1	1	1	1	7	5	3	5	2	2	2	2	1	6	2	1	1	-99	-99	Mozilla/5.0 (Windows NT 10.0; Win64; x64) AppleWebKit/537.36 (KHTML, like Gecko) Chrome/89.0.4389.90 Safari/537.36	-99
1244	0	0	31	5812245	-77	14	-77	-77	-99	-99	d	1	-66	-66	-77	-77	-77	-77	-77	-77	-77	-66	-77	-77	-77	-77	-77	-77	-77	-77	-77	-77	-77	-77	-77	-77	-77	-77	-77	-77	-77	-77	-77	-77	-77	-66	-66	Mozilla/5.0 (iPhone; CPU iPhone OS 14_4 like Mac OS X) AppleWebKit/605.1.15 (KHTML, like Gecko) Version/14.0.3 Mobile/15E148 Safari/604.1	-99
1245	0	0	31	5822659	-77	1047	-77	-77	-99	-99	d	2	4	22	2	3	0	1	0	0	0	-99	6	7	5	6	0	0	0	0	0	0	0	0	0	0	0	0	0	0	0	0	0	0	0	-99	-99	Mozilla/5.0 (iPhone; CPU iPhone OS 14_4 like Mac OS X) AppleWebKit/605.1.15 (KHTML, like Gecko) Version/14.0.3 Mobile/15E148 Safari/604.1	-99
1246	0	0	31	5822659	-77	1295	-77	-77	-99	-99	d	5	1	21	2	2	0	1	0	0	0	-99	4	4	1	1	4	0	0	0	0	0	7	5	7	5	3	3	6	4	7	7	7	2	2	-99	-99	Mozilla/5.0 (iPhone; CPU iPhone OS 14_4 like Mac OS X) AppleWebKit/605.1.15 (KHTML, like Gecko) Version/14.0.3 Mobile/15E148 Safari/604.1	-99
1247	0	0	31	5822659	-77	2139	-77	-77	-99	-99	d	3	11	26	1	2	1	0	0	0	0	-99	6	6	4	3	4	3	5	5	5	6	7	5	3	6	2	1	5	4	4	4	4	2	1	-99	-99	Mozilla/5.0 (Linux; Android 9; G8441) AppleWebKit/537.36 (KHTML, like Gecko) Chrome/74.0.3729.136 Mobile Safari/537.36	android-app://com.google.android.gm
1248	0	0	31	5822659	-77	1354	-77	-77	-99	-99	d	2	3	28	2	2	1	0	0	0	0	-99	7	7	5	7	3	3	3	3	3	5	7	5	4	5	6	4	7	6	5	4	5	5	5	-99	-99	Mozilla/5.0 (Linux; Android 10; ONEPLUS A6003 Build/QKQ1.190716.003; wv) AppleWebKit/537.36 (KHTML, like Gecko) Version/4.0 Chrome/81.0.4044.138 Mobile Safari/537.36 EdgW/1.0	-99
1251	0	0	31	5822659	-77	1454	-77	-77	-99	-99	d	3	16	33	2	2	1	0	0	0	0	-99	5	6	5	5	4	4	6	5	3	3	6	6	5	4	2	2	5	2	4	4	7	2	2	-99	-99	Mozilla/5.0 (Windows NT 10.0; Win64; x64; rv:87.0) Gecko/20100101 Firefox/87.0	-99
1254	0	0	32	5822659	-77	-1	-77	-77	-99	-99	d	5	5	23	2	2	1	0	0	0	0	-99	7	7	7	7	3	1	3	1	1	1	7	7	7	7	7	5	7	7	7	4	7	6	6	-99	-99	Mozilla/5.0 (iPhone; CPU iPhone OS 14_4_2 like Mac OS X) AppleWebKit/605.1.15 (KHTML, like Gecko) Version/14.0.3 Mobile/15E148 Safari/604.1	-99
1255	0	0	31	5822659	-77	1571	-77	-77	-99	-99	d	2	7	35	2	2	1	0	0	0	0	-99	5	4	4	5	5	2	6	4	3	3	5	5	4	4	5	3	5	6	5	3	3	3	3	-99	Manche Fragen waren nicht genau zutreffend, bzw. schwer zu beantworten, da ich neulich eine COVID-Infektion durchgemacht habe.	Mozilla/5.0 (Windows NT 10.0; Win64; x64) AppleWebKit/537.36 (KHTML, like Gecko) Chrome/89.0.4389.114 Safari/537.36	https://webmail.stud.uni-giessen.de/
1256	0	0	31	5822659	-77	1583	-77	-77	-99	-99	d	2	1	38	2	2	1	0	0	0	0	-99	6	6	3	6	3	1	2	1	1	1	7	7	7	7	6	4	7	6	5	4	7	6	6	-99	-99	Mozilla/5.0 (Windows NT 10.0; Win64; x64) AppleWebKit/537.36 (KHTML, like Gecko) Chrome/89.0.4389.114 Safari/537.36	-99
1257	0	0	31	5822659	-77	3028	-77	-77	-99	-99	d	2	5	26	1	2	1	0	0	0	0	-99	3	5	5	5	3	3	5	5	3	2	7	7	7	7	5	6	6	6	6	4	6	4	4	-99	-99	Mozilla/5.0 (iPhone; CPU iPhone OS 14_4_1 like Mac OS X) AppleWebKit/605.1.15 (KHTML, like Gecko) Version/14.0.3 Mobile/15E148 Safari/604.1	-99
1259	0	0	31	5812245	-77	26	-77	-77	-99	-99	d	1	-66	-66	-77	-77	-77	-77	-77	-77	-77	-66	-77	-77	-77	-77	-77	-77	-77	-77	-77	-77	-77	-77	-77	-77	-77	-77	-77	-77	-77	-77	-77	-77	-77	-66	-66	Mozilla/5.0 (iPhone; CPU iPhone OS 14_4 like Mac OS X) AppleWebKit/605.1.15 (KHTML, like Gecko) Version/14.0.3 Mobile/15E148 Safari/604.1	-99
1260	0	0	31	5822659	-77	792	-77	-77	-99	-99	d	2	3	24	2	2	1	0	0	0	0	-99	1	2	3	4	3	3	3	3	3	3	7	5	3	3	3	3	3	3	3	3	3	3	3	-99	-99	Mozilla/5.0 (Macintosh; Intel Mac OS X 10_15_6) AppleWebKit/605.1.15 (KHTML, like Gecko) Version/14.0.3 Safari/605.1.15	https://wm.hrz.uni-giessen.de/horde/imp/dynamic.php?page=mailbox
1261	0	0	31	5822659	-77	896	-77	-77	-99	-99	d	2	9	24	1	2	1	0	0	0	0	-99	7	7	6	7	2	2	6	6	6	1	6	6	6	6	4	4	5	6	7	1	1	1	1	eine neutrale Diskussion schaffen. Es wird immer gegen Impfgegner in einheitlicher Argumentation gewettert. Ich denke damit schafft man eine sehr intolerante Atmosphäre unter den Studierenden. Mal eine Debatte mit einer Impfgegnerin nicht um sie zu überzeugen, sondern um mal ein Gefühl dafür zu bekommen, auf was für einem Niveau sich die Debatte zuträgt wäre mal gut.	-99	Mozilla/5.0 (Windows NT 10.0; Win64; x64; rv:87.0) Gecko/20100101 Firefox/87.0	https://webmail.stud.uni-giessen.de/
1262	0	0	32	5822659	-77	-1	-77	-77	-99	-99	d	2	3	27	2	2	1	0	0	0	0	-99	2	4	3	3	4	3	2	2	3	2	7	7	7	4	5	5	6	6	6	6	6	4	4	-99	Durch den Vertrauensverlust in der Politik, hat meiner Meinung nach die Wissenschaft ebenfalls an Vertrauen, Ehrlichkeit und Unabhängigkeit verloren. Viele Menschen in der Gesellschaft leiden massiv darunter.ich bekam heute in der Bahn mit, dass ein älterer Herr, über 50/60 Jahre alt, den Sender wechselt und nicht mehr hinhört, wenn es um Corona geht. Auch ich versuche meine Distanz zuhalten, ich…	Mozilla/5.0 (iPhone; CPU iPhone OS 12_5_2 like Mac OS X) AppleWebKit/605.1.15 (KHTML, like Gecko) Version/12.1.2 Mobile/15E148 Safari/604.1	-99
1263	0	0	31	5822659	-77	2323	-77	-77	-99	-99	d	3	12	29	2	2	1	0	0	0	0	-99	4	4	4	4	3	3	6	5	3	3	7	6	6	5	6	6	5	6	4	4	7	4	5	-99	-99	Mozilla/5.0 (Linux; Android 9; SAMSUNG SM-J330F) AppleWebKit/537.36 (KHTML, like Gecko) SamsungBrowser/13.2 Chrome/83.0.4103.106 Mobile Safari/537.36	-99
1265	0	0	31	5822659	-77	1374	-77	-77	-99	-99	d	2	1	19	1	2	1	0	0	0	0	-99	2	3	5	3	5	3	4	1	1	1	7	7	7	7	7	5	7	4	3	5	4	5	5	-99	-99	Mozilla/5.0 (Macintosh; Intel Mac OS X 10_15_6) AppleWebKit/605.1.15 (KHTML, like Gecko) Version/14.0.2 Safari/605.1.15	-99
1264	0	0	31	5822659	-77	664	-77	-77	-99	-99	d	2	10	27	1	2	1	0	0	0	0	-99	3	7	3	3	1	1	4	3	3	1	7	6	6	6	2	2	7	5	4	3	6	5	5	-99	-99	Mozilla/5.0 (Windows NT 10.0; Win64; x64) AppleWebKit/537.36 (KHTML, like Gecko) Chrome/89.0.4389.114 Safari/537.36	-99
1266	0	0	31	5822659	-77	1088	-77	-77	-99	-99	d	3	12	23	2	2	1	1	0	0	0	-99	1	1	2	5	3	2	5	5	2	3	6	5	3	3	2	1	5	4	3	3	3	2	2	-99	-99	Mozilla/5.0 (Windows NT 10.0; Win64; x64; rv:87.0) Gecko/20100101 Firefox/87.0	https://webmail.stud.uni-giessen.de/
1267	0	0	31	5822659	-77	1414	-77	-77	-99	-99	d	2	5	21	2	2	1	0	0	0	0	-99	2	2	2	2	3	3	2	2	2	2	6	6	6	5	4	4	4	4	4	4	4	4	4	-99	-99	Mozilla/5.0 (Macintosh; Intel Mac OS X 10_11_6) AppleWebKit/605.1.15 (KHTML, like Gecko) Version/11.1.2 Safari/605.1.15	-99
1272	0	0	31	5822659	-77	1370	-77	-77	-99	-99	d	2	7	23	1	2	1	0	0	0	0	-99	5	5	2	2	1	1	2	3	2	2	7	6	6	6	5	5	6	6	3	5	6	3	3	-99	-99	Mozilla/5.0 (Windows NT 10.0; Win64; x64; rv:87.0) Gecko/20100101 Firefox/87.0	-99
1270	0	0	31	5822659	-77	976	-77	-77	-99	-99	d	2	6	21	2	2	1	0	0	0	0	-99	7	7	7	7	7	7	1	7	1	1	7	7	7	7	7	7	7	7	1	7	7	7	7	-99	-99	Mozilla/5.0 (iPhone; CPU iPhone OS 14_4_1 like Mac OS X) AppleWebKit/605.1.15 (KHTML, like Gecko) Version/14.0.3 Mobile/15E148 Safari/604.1	-99
1271	0	0	31	5822659	-77	1448	-77	-77	-99	-99	d	2	7	29	1	2	1	0	0	0	0	-99	5	2	1	1	5	1	5	3	1	1	6	5	4	5	4	6	5	4	3	5	4	2	2	-99	-99	Mozilla/5.0 (Macintosh; Intel Mac OS X 10_15_7) AppleWebKit/605.1.15 (KHTML, like Gecko) Version/14.0.3 Safari/605.1.15	-99
1273	0	0	31	5822659	-77	2296	-77	-77	-99	-99	d	2	2	23	2	2	0	1	0	0	0	-99	4	2	2	3	1	1	1	1	1	1	7	5	6	6	6	6	5	5	4	4	4	4	4	-99	-99	Mozilla/5.0 (Linux; Android 10; MAR-LX1B) AppleWebKit/537.36 (KHTML, like Gecko) Chrome/89.0.4389.105 Mobile Safari/537.36	-99
1277	0	0	31	5822659	-77	1023	-77	-77	-99	-99	d	5	5	23	2	2	1	0	0	0	0	-99	7	7	7	7	1	1	4	3	3	1	7	4	7	4	5	4	7	4	1	7	7	1	1	-99	-99	Mozilla/5.0 (iPhone; CPU iPhone OS 14_4_1 like Mac OS X) AppleWebKit/605.1.15 (KHTML, like Gecko) Version/14.0.3 Mobile/15E148 Safari/604.1	-99
1278	0	0	31	5822659	-77	1306	-77	-77	-99	-99	d	5	4	21	2	2	1	0	0	0	0	-99	3	3	3	3	0	0	0	0	0	0	0	0	0	0	0	0	0	0	0	0	0	0	0	-99	-99	Mozilla/5.0 (Windows NT 10.0; Win64; x64; rv:87.0) Gecko/20100101 Firefox/87.0	-99
1279	0	0	31	5822659	-77	1307	-77	-77	-99	-99	d	2	3	26	2	2	1	0	0	0	0	-99	5	5	6	5	5	5	4	3	2	2	7	7	7	7	6	5	6	6	4	4	4	4	4	-99	-99	Mozilla/5.0 (Linux; Android 10; SM-G965F Build/QP1A.190711.020; wv) AppleWebKit/537.36 (KHTML, like Gecko) Version/4.0 Chrome/81.0.4044.138 Mobile Safari/537.36 StudoBrowser/4.02.4-android-studo (https://studo.com/studo-browser-information-and-contact)	-99
1280	0	0	31	5822659	-77	837	-77	-77	-99	-99	d	2	3	21	2	2	1	0	0	0	0	-99	6	7	6	5	2	2	2	2	3	1	7	7	7	5	6	5	6	6	6	2	4	5	5	-99	-99	Mozilla/5.0 (Macintosh; Intel Mac OS X 10_15_6) AppleWebKit/605.1.15 (KHTML, like Gecko) Version/14.0.3 Safari/605.1.15	-99
1282	0	0	31	5822659	-77	856	-77	-77	-99	-99	d	5	2	19	2	2	1	0	0	0	0	-99	7	7	7	7	6	6	4	4	4	2	7	5	6	6	6	6	7	7	6	6	7	5	6	-99	-99	Mozilla/5.0 (Windows NT 10.0; Win64; x64) AppleWebKit/537.36 (KHTML, like Gecko) Chrome/89.0.4389.114 Safari/537.36	-99
1284	0	0	31	5822659	-77	4422	-77	-77	-99	-99	d	2	9	27	2	2	0	1	0	0	0	-99	6	5	3	2	2	1	6	3	1	1	7	6	6	7	5	4	7	6	5	4	5	3	3	Ich würde gerne lernen, wie man Patienten zu Impfungen am besten berät (z.B. bezüglich Wirksamkeit und dem Risiko von Nebenwirkungen in Prozentzahlen oder einem anschaulichen Vergleich und mit fundiertem medizinischem Hintergrund zur Wirkung). Besonders wichtig finde ich zu lernen, wie man mit Impfskeptikern/-kritikern umgeht und ihnen bestenfalls durch gute, Studien gestützte Argumente die Angst…	Ich finde diese Umfrage sehr wertvoll für ein (hoffentlich) reales Bild zum Thema Impfen (Schwerpunkt Covid) unter Medizinstudierenden. Es ist schön zu sehen, dass wir nicht (wie zuletzt noch letztes Jahr) bei den Impfungen vergessen werden, da wir mitunter viel Patientenkontakt im Studium haben und diesen Schutz auch brauchen.	Mozilla/5.0 (Windows NT 10.0; Win64; x64; rv:87.0) Gecko/20100101 Firefox/87.0	https://wm.hrz.uni-giessen.de/
1283	0	0	31	5822659	-77	1197	-77	-77	-99	-99	d	2	7	26	2	2	1	0	0	0	0	-99	5	7	5	6	1	1	1	1	3	3	6	5	2	2	2	2	5	6	4	4	4	5	5	-99	-99	Mozilla/5.0 (Windows NT 10.0; Win64; x64) AppleWebKit/537.36 (KHTML, like Gecko) Chrome/89.0.4389.114 Safari/537.36	-99
1288	0	0	31	5822659	-77	950	-77	-77	-99	-99	d	2	10	23	1	2	1	0	0	0	0	-99	1	1	1	1	1	1	3	2	1	1	7	7	7	7	7	7	7	7	7	7	7	4	1	-99	-99	Mozilla/5.0 (Windows NT 10.0) AppleWebKit/537.36 (KHTML, like Gecko) Chrome/88.0.4324.192 Safari/537.36 OPR/74.0.3911.218	https://wm.hrz.uni-giessen.de/horde/imp/dynamic.php?page=mailbox
1290	0	0	31	5822659	-77	832	-77	-77	-99	-99	d	2	6	22	1	2	1	0	0	0	0	-99	7	7	7	7	1	1	3	1	1	1	7	7	7	7	7	1	7	7	7	1	3	7	7	-99	-99	Mozilla/5.0 (iPad; CPU OS 12_5_1 like Mac OS X) AppleWebKit/605.1.15 (KHTML, like Gecko) Version/12.1.2 Mobile/15E148 Safari/604.1	-99
1291	0	0	31	5822659	-77	1078	-77	-77	-99	-99	d	2	1	26	1	2	0	1	0	0	0	-99	5	5	4	2	0	0	0	0	0	0	0	0	0	0	0	0	0	0	0	0	0	0	0	-99	-99	Mozilla/5.0 (Windows NT 10.0; Win64; x64; rv:87.0) Gecko/20100101 Firefox/87.0	https://wm.hrz.uni-giessen.de/
1292	0	0	31	5822659	-77	891	-77	-77	-99	-99	d	2	10	26	2	2	1	0	0	0	0	-99	7	7	5	6	0	0	0	0	0	0	0	0	0	0	0	0	0	0	0	0	0	0	0	-99	-99	Mozilla/5.0 (iPhone; CPU iPhone OS 14_4 like Mac OS X) AppleWebKit/605.1.15 (KHTML, like Gecko) Version/14.0.3 Mobile/15E148 Safari/604.1	https://wm.hrz.uni-giessen.de/horde/imp/smartmobile.php
1293	0	0	32	5822659	-77	-1	-77	-77	-99	-99	d	2	5	28	1	2	1	0	0	0	0	-99	5	5	3	3	1	1	2	1	1	1	7	7	6	6	5	5	5	5	3	4	4	3	2	-99	-99	Mozilla/5.0 (Macintosh; Intel Mac OS X 10_15_6) AppleWebKit/605.1.15 (KHTML, like Gecko) Version/14.0.3 Safari/605.1.15	-99
1770	0	0	31	5822659	-77	919	-77	-77	-99	-99	d	2	5	23	2	2	1	0	0	0	0	-99	5	5	3	2	2	2	3	1	1	2	7	6	6	5	6	5	5	7	4	4	4	4	4	-99	-99	Mozilla/5.0 (Windows NT 10.0; Win64; x64) AppleWebKit/537.36 (KHTML, like Gecko) Chrome/89.0.4389.114 Safari/537.36	-99
1295	0	0	31	5822659	-77	1491	-77	-77	-99	-99	d	2	2	19	2	2	1	0	0	0	0	-99	5	5	2	2	1	1	2	1	1	1	6	5	5	7	5	5	5	7	2	6	4	4	4	-99	-99	Mozilla/5.0 (Linux; Android 10; SNE-LX1) AppleWebKit/537.36 (KHTML, like Gecko) Chrome/89.0.4389.105 Mobile Safari/537.36	-99
1296	0	0	31	5822659	-77	731	-77	-77	-99	-99	d	2	9	26	2	2	1	0	0	0	0	-99	4	2	2	2	3	3	3	3	3	3	5	5	4	5	2	2	6	4	2	5	4	3	3	-99	-99	Mozilla/5.0 (Windows NT 10.0; Win64; x64) AppleWebKit/537.36 (KHTML, like Gecko) Chrome/89.0.4389.114 Safari/537.36	-99
1297	0	0	31	5812245	-77	9	-77	-77	-99	-99	d	1	-66	-66	-77	-77	-77	-77	-77	-77	-77	-66	-77	-77	-77	-77	-77	-77	-77	-77	-77	-77	-77	-77	-77	-77	-77	-77	-77	-77	-77	-77	-77	-77	-77	-66	-66	Mozilla/5.0 (Macintosh; Intel Mac OS X 10_15_6) AppleWebKit/605.1.15 (KHTML, like Gecko) Version/14.0.3 Safari/605.1.15	-99
1300	0	0	31	5822659	-77	987	-77	-77	-99	-99	d	2	8	22	1	2	1	0	0	0	0	-99	5	5	5	5	5	4	5	5	2	1	7	7	6	6	4	7	6	6	6	6	6	7	7	-99	-99	Mozilla/5.0 (Windows NT 10.0; Win64; x64; rv:87.0) Gecko/20100101 Firefox/87.0	https://wm.hrz.uni-giessen.de/
1298	0	0	32	5822659	-77	-1	-77	-77	-99	-99	d	2	2	27	2	2	1	0	0	0	0	-99	4	4	2	2	6	6	5	4	4	4	7	6	7	7	4	5	6	5	5	4	6	5	5	-99	-99	Mozilla/5.0 (iPhone; CPU iPhone OS 12_5_1 like Mac OS X) AppleWebKit/605.1.15 (KHTML, like Gecko) Version/12.1.2 Mobile/15E148 Safari/604.1	-99
1299	0	0	31	5822659	-77	1636	-77	-77	-99	-99	d	2	4	23	2	2	1	0	0	0	0	-99	4	4	1	1	5	5	7	5	5	4	7	7	4	1	2	2	2	3	4	4	4	1	1	-99	-99	Mozilla/5.0 (iPhone; CPU iPhone OS 14_4 like Mac OS X) AppleWebKit/605.1.15 (KHTML, like Gecko) Version/14.0.3 Mobile/15E148 Safari/604.1	https://wm.hrz.uni-giessen.de/horde/imp/smartmobile.php
1301	0	0	31	5822659	-77	1506	-77	-77	-99	-99	d	2	2	19	3	2	0	1	0	0	0	-99	5	5	2	3	0	0	0	0	0	0	0	0	0	0	0	0	0	0	0	0	0	0	0	-99	-99	Mozilla/5.0 (iPhone; CPU iPhone OS 14_4_2 like Mac OS X) AppleWebKit/605.1.15 (KHTML, like Gecko) Version/14.0.3 Mobile/15E148 Safari/604.1	-99
1303	0	0	31	5822659	-77	1168	-77	-77	-99	-99	d	2	3	26	2	2	1	0	0	0	0	-99	5	4	3	4	3	2	2	1	1	1	6	4	5	5	5	5	5	4	6	2	6	4	4	-99	-99	Mozilla/5.0 (Linux; Android 9; ANE-LX1 Build/HUAWEIANE-L21; wv) AppleWebKit/537.36 (KHTML, like Gecko) Version/4.0 Chrome/89.0.4389.105 Mobile Safari/537.36 StudoBrowser/4.02.4-android-studo (https://studo.com/studo-browser-information-and-contact)	-99
1304	0	0	31	5812245	-77	11	-77	-77	-99	-99	d	1	-66	-66	-77	-77	-77	-77	-77	-77	-77	-66	-77	-77	-77	-77	-77	-77	-77	-77	-77	-77	-77	-77	-77	-77	-77	-77	-77	-77	-77	-77	-77	-77	-77	-66	-66	Mozilla/5.0 (iPhone; CPU iPhone OS 14_4_1 like Mac OS X) AppleWebKit/605.1.15 (KHTML, like Gecko) Version/14.0.3 Mobile/15E148 Safari/604.1	-99
1305	0	0	31	5822659	-77	1084	-77	-77	-99	-99	d	2	10	25	1	2	1	0	0	0	0	-99	6	7	7	7	4	2	6	3	2	3	7	7	7	7	7	7	7	7	7	7	7	7	7	-99	-99	Mozilla/5.0 (iPhone; CPU iPhone OS 9_3_6 like Mac OS X) AppleWebKit/601.1.46 (KHTML, like Gecko) Version/9.0 Mobile/13G37 Safari/601.1	-99
1306	0	0	32	5822659	-77	-1	-77	-77	-99	-99	d	2	10	24	2	2	0	1	0	0	0	-99	4	3	5	5	2	2	5	3	2	2	7	6	6	6	6	5	6	6	5	6	6	4	4	-99	-99	Mozilla/5.0 (Linux; Android 10; MAR-LX1A) AppleWebKit/537.36 (KHTML, like Gecko) Chrome/89.0.4389.105 Mobile Safari/537.36	https://deref-gmx.net/
1307	0	0	31	5822659	-77	774	-77	-77	-99	-99	d	2	7	21	2	2	1	0	0	0	0	-99	7	7	7	5	3	2	5	3	3	3	7	5	5	4	6	6	6	6	3	6	5	2	2	-99	-99	Mozilla/5.0 (Macintosh; Intel Mac OS X 10_13_6) AppleWebKit/605.1.15 (KHTML, like Gecko) Version/13.1 Safari/605.1.15	-99
1308	0	0	31	5822659	-77	2097	-77	-77	-99	-99	d	2	8	26	2	2	1	0	0	0	0	-99	5	5	4	5	1	1	4	4	3	1	6	6	6	5	4	5	6	7	4	7	4	4	4	-99	-99	Mozilla/5.0 (Windows NT 10.0; Win64; x64) AppleWebKit/537.36 (KHTML, like Gecko) Chrome/89.0.4389.90 Safari/537.36 Edg/89.0.774.63	-99
5577	0	0	31	5822659	-77	894	-77	-77	-99	-99	d	5	2	24	1	2	1	0	0	0	0	-99	4	5	5	5	4	4	6	4	4	4	6	6	6	6	2	2	5	5	5	5	5	2	2	-99	-99	Mozilla/5.0 (iPhone; CPU iPhone OS 14_4 like Mac OS X) AppleWebKit/605.1.15 (KHTML, like Gecko) CriOS/87.0.4280.77 Mobile/15E148 Safari/604.1	-99
1309	0	0	31	5822659	-77	883	-77	-77	-99	-99	d	2	7	24	2	2	0	1	0	0	0	-99	4	4	6	7	4	4	5	4	4	4	4	4	4	4	4	4	4	4	4	5	3	2	2	-99	-99	Mozilla/5.0 (iPhone; CPU iPhone OS 14_4_1 like Mac OS X) AppleWebKit/605.1.15 (KHTML, like Gecko) Version/14.0.3 Mobile/15E148 Safari/604.1	-99
1310	0	0	31	5822659	-77	976	-77	-77	-99	-99	d	2	4	23	2	2	1	0	0	0	0	-99	6	5	2	2	0	0	0	0	0	0	0	0	0	0	0	0	0	0	0	0	0	0	0	-99	-99	Mozilla/5.0 (Linux; Android 10; moto g(8) power) AppleWebKit/537.36 (KHTML, like Gecko) Chrome/89.0.4389.105 Mobile Safari/537.36	-99
1311	0	0	31	5822659	-77	806	-77	-77	-99	-99	d	2	8	22	1	2	0	1	0	0	0	-99	7	6	6	6	2	5	6	5	2	1	7	7	7	7	7	7	7	7	7	7	7	4	4	-99	-99	Mozilla/5.0 (iPhone; CPU iPhone OS 14_4_1 like Mac OS X) AppleWebKit/605.1.15 (KHTML, like Gecko) Version/14.0.3 Mobile/15E148 Safari/604.1	-99
1312	0	0	31	5822659	-77	950	-77	-77	-99	-99	d	2	4	28	2	2	1	0	0	0	0	-99	5	5	3	5	2	2	2	2	5	2	7	7	3	6	4	4	5	5	1	5	3	2	2	-99	-99	Mozilla/5.0 (Macintosh; Intel Mac OS X 10_15_6) AppleWebKit/605.1.15 (KHTML, like Gecko) Version/14.0.3 Safari/605.1.15	-99
1313	0	0	31	5822659	-77	1085	-77	-77	-99	-99	d	2	9	23	2	2	1	0	0	0	0	-99	7	7	7	7	1	1	5	5	1	1	7	7	7	7	7	7	7	7	7	7	7	7	7	-99	-99	Mozilla/5.0 (Windows NT 10.0; Win64; x64) AppleWebKit/537.36 (KHTML, like Gecko) Chrome/89.0.4389.90 Safari/537.36	-99
1314	0	0	31	5822659	-77	957	-77	-77	-99	-99	d	2	1	19	2	2	1	0	0	0	0	-99	1	7	7	7	0	0	0	0	0	0	0	0	0	0	0	0	0	0	0	0	0	0	0	-99	-99	Mozilla/5.0 (Macintosh; Intel Mac OS X 10_14_6) AppleWebKit/605.1.15 (KHTML, like Gecko) Version/14.0.1 Safari/605.1.15	-99
1316	0	0	31	5822659	-77	1374	-77	-77	-99	-99	d	5	2	20	2	2	0	1	0	0	0	-99	6	4	6	6	2	1	2	1	1	1	7	6	6	6	5	5	5	5	4	4	4	4	4	-99	Ich möchte gerne geimpft werden und hätte gerne die Möglichkeit dies auch an der Uni zu bekommen.	Mozilla/5.0 (Linux; Android 10; SAMSUNG SM-G960F) AppleWebKit/537.36 (KHTML, like Gecko) SamsungBrowser/13.2 Chrome/83.0.4103.106 Mobile Safari/537.36	-99
1315	0	0	31	5822659	-77	1137	-77	-77	-99	-99	d	2	5	23	2	2	1	0	0	0	0	-99	5	2	2	2	1	1	1	1	1	1	7	7	7	7	6	7	0	6	7	2	5	4	4	-99	-99	Mozilla/5.0 (Linux; Android 8.0.0; SM-G935F) AppleWebKit/537.36 (KHTML, like Gecko) Chrome/89.0.4389.105 Mobile Safari/537.36	-99
1317	0	0	31	5822659	-77	1120	-77	-77	-99	-99	d	2	8	22	1	2	0	1	0	0	0	-99	6	7	6	6	0	0	0	0	0	0	0	0	0	0	0	0	0	0	0	0	0	0	0	-99	-99	Mozilla/5.0 (iPhone; CPU iPhone OS 13_6 like Mac OS X) AppleWebKit/605.1.15 (KHTML, like Gecko) Version/13.1.2 Mobile/15E148 Safari/604.1	-99
1318	0	0	31	5822659	-77	909	-77	-77	-99	-99	d	5	2	23	2	2	0	1	0	0	0	-99	5	5	3	3	4	4	4	4	4	4	7	7	7	7	6	7	7	7	5	5	5	4	4	-99	-99	Mozilla/5.0 (Windows NT 10.0; Win64; x64) AppleWebKit/537.36 (KHTML, like Gecko) Chrome/89.0.4389.90 Safari/537.36 Edg/89.0.774.63	https://wm.hrz.uni-giessen.de/
1319	0	0	31	5822659	-77	1287	-77	-77	-99	-99	d	2	5	27	2	2	0	1	0	0	0	-99	5	6	5	5	5	5	6	5	4	3	7	5	6	6	5	5	6	5	2	6	2	5	5	Buchempfehlung: Pillen Heiler Globuli von Beate Frenkel	-99	Mozilla/5.0 (Linux; Android 9; Redmi Note 5) AppleWebKit/537.36 (KHTML, like Gecko) Chrome/89.0.4389.105 Mobile Safari/537.36	android-app://com.google.android.gm/
1320	0	0	31	5822659	-77	1089	-77	-77	-99	-99	d	2	6	21	2	2	0	1	0	0	0	-99	5	6	5	4	4	7	7	5	3	2	7	5	5	6	3	1	6	6	6	1	4	4	4	-99	-99	Mozilla/5.0 (Linux; Android 11; Pixel 2) AppleWebKit/537.36 (KHTML, like Gecko) Chrome/89.0.4389.105 Mobile Safari/537.36	https://ofamed.de/
1322	0	0	31	5822659	-77	963	-77	-77	-99	-99	d	2	9	22	2	2	1	0	0	0	0	-99	1	1	6	6	2	2	4	5	1	1	5	4	6	6	5	5	5	4	1	4	4	1	1	-99	Bei manchen Fragen war es schwierig diese zu beantworte, da ich wegen einer durchgemachten Infektion noch bis Juli warten soll um die Impfung zu erhalten, dh ich bin zwar pro Impfen, aber soll halt noch nicht.	Mozilla/5.0 (X11; CrOS x86_64 13597.84.0) AppleWebKit/537.36 (KHTML, like Gecko) Chrome/88.0.4324.153 Safari/537.36	https://wm.hrz.uni-giessen.de/
1324	0	0	31	5812245	-77	4	-77	-77	-99	-99	d	1	-66	-66	-77	-77	-77	-77	-77	-77	-77	-66	-77	-77	-77	-77	-77	-77	-77	-77	-77	-77	-77	-77	-77	-77	-77	-77	-77	-77	-77	-77	-77	-77	-77	-66	-66	Mozilla/5.0 (iPhone; CPU iPhone OS 14_4 like Mac OS X) AppleWebKit/605.1.15 (KHTML, like Gecko) Version/14.0.3 Mobile/15E148 Safari/604.1	-99
1325	0	0	31	5822659	-77	1208	-77	-77	-99	-99	d	5	4	19	2	2	1	0	0	0	0	-99	6	6	6	6	2	2	2	2	2	2	7	7	7	7	7	7	7	7	7	5	7	7	7	-99	-99	Mozilla/5.0 (Macintosh; Intel Mac OS X 10_15_4) AppleWebKit/605.1.15 (KHTML, like Gecko) Version/13.1 Safari/605.1.15	-99
1327	0	0	31	5822659	-77	935	-77	-77	-99	-99	d	2	5	29	2	2	1	0	0	0	0	-99	1	7	7	7	1	1	1	2	1	1	7	5	3	3	1	4	1	6	3	5	7	1	1	-99	-99	Mozilla/5.0 (iPhone; CPU iPhone OS 14_4_1 like Mac OS X) AppleWebKit/605.1.15 (KHTML, like Gecko) Version/14.0.3 Mobile/15E148 Safari/604.1	-99
1328	0	0	31	5822659	-77	2414	-77	-77	-99	-99	d	2	5	26	2	1	1	1	0	0	0	-99	7	7	6	6	6	6	2	1	1	1	7	7	7	7	7	7	7	7	7	7	4	4	4	-99	-99	Mozilla/5.0 (Windows NT 10.0; Win64; x64) AppleWebKit/537.36 (KHTML, like Gecko) Chrome/88.0.4324.192 Safari/537.36 OPR/74.0.3911.218	https://wm.hrz.uni-giessen.de/horde/imp/dynamic.php?page=mailbox
1329	0	0	31	5822659	-77	1736	-77	-77	-99	-99	d	2	7	26	2	2	0	1	0	0	0	-99	6	6	5	5	3	7	4	2	2	2	7	7	7	7	7	4	7	7	7	1	3	7	7	-99	-99	Mozilla/5.0 (Windows NT 10.0; Win64; x64) AppleWebKit/537.36 (KHTML, like Gecko) Chrome/89.0.4389.114 Safari/537.36	https://ofamed.de/
1330	0	0	31	5822659	-77	1074	-77	-77	-99	-99	d	2	4	20	2	2	1	0	0	0	0	-99	4	4	3	3	1	1	1	1	1	1	7	7	7	7	4	7	7	7	7	7	4	4	4	-99	-99	Mozilla/5.0 (Windows NT 10.0; Win64; x64) AppleWebKit/537.36 (KHTML, like Gecko) Chrome/89.0.4389.90 Safari/537.36 Edg/89.0.774.63	https://wm.hrz.uni-giessen.de/
1332	0	0	31	5822659	-77	1166	-77	-77	-99	-99	d	2	9	24	2	2	1	0	0	0	0	-99	7	7	7	7	4	4	7	7	7	1	7	7	7	7	7	7	7	7	7	4	4	4	4	-99	manche Dinge waren schwammige ausgedrückt; wie zum Beispiel: was ist die Definition von Risiken, wie schwerwiegend sollen diese sei? Genau wie Nebenwirkungen.	Mozilla/5.0 (iPhone; CPU iPhone OS 14_4 like Mac OS X) AppleWebKit/605.1.15 (KHTML, like Gecko) Version/14.0.3 Mobile/15E148 Safari/604.1	-99
1333	0	0	31	5822659	-77	727	-77	-77	-99	-99	d	2	6	21	2	2	0	1	0	0	0	-99	7	7	7	7	2	2	3	2	1	1	7	7	7	7	7	7	7	7	7	1	3	1	1	-99	-99	Mozilla/5.0 (Macintosh; Intel Mac OS X 10_15_6) AppleWebKit/605.1.15 (KHTML, like Gecko) Version/14.0.3 Safari/605.1.15	https://student.uniklinikum-leipzig.de/studium/allgemeines_interessantes.php
1334	0	0	31	5822659	-77	1329	-77	-77	-99	-99	d	2	10	27	1	2	1	0	0	0	0	-99	6	7	7	5	5	1	1	5	4	3	7	5	5	5	4	7	5	7	7	2	4	5	6	Den Historischen Hintergrund beleuchten & Verknüpfung mit Lehre über Immunantwort im allgemeinen.	-99	Mozilla/5.0 (iPhone; CPU iPhone OS 14_4_1 like Mac OS X) AppleWebKit/605.1.15 (KHTML, like Gecko) Version/14.0.3 Mobile/15E148 Safari/604.1	-99
1336	0	0	31	5822659	-77	1338	-77	-77	-99	-99	d	2	5	21	2	2	1	0	0	0	0	-99	6	7	5	5	2	1	1	1	1	1	7	5	6	6	6	6	7	7	4	4	7	4	5	-99	-99	Mozilla/5.0 (Macintosh; Intel Mac OS X 10_15_6) AppleWebKit/605.1.15 (KHTML, like Gecko) Version/14.0.3 Safari/605.1.15	https://webmail.stud.uni-giessen.de/horde/imp/dynamic.php?page=mailbox
1335	0	0	31	5822659	-77	1706	-77	-77	-99	-99	d	5	9	23	2	2	1	0	0	0	0	-99	6	7	6	5	5	2	3	2	1	2	5	5	6	5	5	5	6	5	4	4	4	4	4	-99	-99	Mozilla/5.0 (iPhone; CPU iPhone OS 14_4_1 like Mac OS X) AppleWebKit/605.1.15 (KHTML, like Gecko) Version/14.0.3 Mobile/15E148 Safari/604.1	-99
1337	0	0	31	5822659	-77	760	-77	-77	-99	-99	d	2	6	21	2	2	0	1	0	0	0	-99	6	6	5	5	2	2	2	2	2	1	6	7	7	7	7	7	7	7	4	3	4	1	1	-99	-99	Mozilla/5.0 (Windows NT 10.0; Win64; x64; rv:87.0) Gecko/20100101 Firefox/87.0	https://student.uniklinikum-leipzig.de/
1338	0	0	31	5822659	-77	1093	-77	-77	-99	-99	d	2	8	24	2	2	0	1	0	0	0	-99	7	5	4	4	3	1	4	2	2	2	5	5	5	4	3	4	5	5	4	4	4	1	1	-99	-99	Mozilla/5.0 (iPhone; CPU iPhone OS 14_4_1 like Mac OS X) AppleWebKit/605.1.15 (KHTML, like Gecko) Version/14.0.3 Mobile/15E148 Safari/604.1	-99
1339	0	0	31	5812245	-77	13	-77	-77	-99	-99	d	1	-66	-66	-77	-77	-77	-77	-77	-77	-77	-66	-77	-77	-77	-77	-77	-77	-77	-77	-77	-77	-77	-77	-77	-77	-77	-77	-77	-77	-77	-77	-77	-77	-77	-66	-66	Mozilla/5.0 (Windows NT 10.0; WOW64) AppleWebKit/537.36 (KHTML, like Gecko) Chrome/88.0.4324.192 Safari/537.36 OPR/74.0.3911.218	https://wm.hrz.uni-giessen.de/horde/imp/dynamic.php?page=mailbox
1341	0	0	31	5822659	-77	1847	-77	-77	-99	-99	d	2	9	22	2	2	1	0	0	0	0	-99	5	6	5	6	1	1	4	3	3	3	7	6	5	6	4	5	5	5	2	5	2	1	1	-99	-99	Mozilla/5.0 (iPhone; CPU iPhone OS 14_4_1 like Mac OS X) AppleWebKit/605.1.15 (KHTML, like Gecko) Version/14.0.3 Mobile/15E148 Safari/604.1	-99
1342	0	0	31	5822659	-77	696	-77	-77	-99	-99	d	2	2	20	2	2	0	0	0	1	0	-99	1	1	1	1	1	1	1	1	1	1	7	7	5	5	2	5	5	7	7	7	7	5	5	-99	-99	Mozilla/5.0 (Macintosh; Intel Mac OS X 10_15_6) AppleWebKit/605.1.15 (KHTML, like Gecko) Version/14.0.3 Safari/605.1.15	https://student.uniklinikum-leipzig.de/studium/allgemeines_interessantes.php
1343	0	0	31	5822659	-77	669	-77	-77	-99	-99	d	2	7	23	2	2	1	0	0	0	0	-99	7	7	3	3	2	1	6	4	1	1	7	7	7	7	7	7	6	6	2	2	6	6	6	-99	-99	Mozilla/5.0 (Macintosh; Intel Mac OS X 10_15_6) AppleWebKit/605.1.15 (KHTML, like Gecko) Version/14.0.2 Safari/605.1.15	-99
1344	0	0	32	5822659	-77	-1	-77	-77	-99	-99	d	2	8	22	1	2	1	1	0	0	0	-99	7	7	7	7	6	7	7	5	7	3	7	3	5	5	2	4	4	5	2	5	5	3	5	-99	-99	Mozilla/5.0 (Windows NT 10.0; Win64; x64; rv:87.0) Gecko/20100101 Firefox/87.0	-99
1346	0	0	31	5822659	-77	4227	-77	-77	-99	-99	d	2	3	24	2	2	1	0	0	0	0	-99	4	5	5	5	4	4	4	4	4	4	5	5	4	5	2	2	5	2	2	5	2	2	2	-99	-99	Mozilla/5.0 (Windows NT 10.0; Win64; x64; rv:87.0) Gecko/20100101 Firefox/87.0	-99
1349	0	0	31	5822659	-77	1237	-77	-77	-99	-99	d	2	4	20	2	2	0	1	0	0	0	-99	5	4	4	4	2	2	2	1	3	2	7	5	4	4	2	3	5	5	4	4	4	3	4	-99	-99	Mozilla/5.0 (Linux; Android 9; ANE-LX1) AppleWebKit/537.36 (KHTML, like Gecko) Chrome/89.0.4389.105 Mobile Safari/537.36	-99
1350	0	0	31	5822659	-77	1399	-77	-77	-99	-99	d	2	5	36	2	2	1	0	0	0	0	-99	4	6	6	6	2	2	2	2	2	2	6	5	4	5	4	4	5	5	3	5	5	4	4	-99	-99	Mozilla/5.0 (Linux; Android 11; SAMSUNG SM-G780F) AppleWebKit/537.36 (KHTML, like Gecko) SamsungBrowser/13.2 Chrome/83.0.4103.106 Mobile Safari/537.36	-99
1351	0	0	31	5822659	-77	1003	-77	-77	-99	-99	d	2	8	26	1	2	1	0	0	0	0	-99	7	7	7	7	1	1	5	5	5	1	7	7	7	7	7	7	7	7	4	4	7	4	4	-99	-99	Mozilla/5.0 (Macintosh; Intel Mac OS X 10_15_6) AppleWebKit/605.1.15 (KHTML, like Gecko) Version/14.0.3 Safari/605.1.15	-99
1352	0	0	31	5822659	-77	1416	-77	-77	-99	-99	d	2	2	24	2	2	0	1	0	0	0	-99	5	4	4	4	4	4	4	4	4	4	6	6	4	5	4	4	4	4	4	6	4	1	1	-99	-99	Mozilla/5.0 (iPhone; CPU iPhone OS 14_4_2 like Mac OS X) AppleWebKit/605.1.15 (KHTML, like Gecko) Mobile/15E148 StudoBrowser/4.02.3-ios-studo (https://studo.com/studo-browser-information-and-contact)	-99
1353	0	0	31	5822659	-77	1018	-77	-77	-99	-99	d	2	2	22	1	2	1	0	0	0	0	-99	5	5	5	5	0	0	0	0	0	0	0	0	0	0	0	0	0	0	0	0	0	0	0	-99	-99	Mozilla/5.0 (Windows NT 10.0; Win64; x64) AppleWebKit/537.36 (KHTML, like Gecko) Chrome/89.0.4389.114 Safari/537.36	-99
1356	0	0	32	5822659	-77	-1	-77	-77	-99	-99	d	2	2	21	1	2	0	1	0	0	0	-99	6	6	6	4	5	5	4	4	5	5	7	5	6	5	3	3	5	4	4	4	4	4	4	-99	-99	Mozilla/5.0 (Windows NT 10.0; Win64; x64) AppleWebKit/537.36 (KHTML, like Gecko) Chrome/89.0.4389.90 Safari/537.36	https://wm.hrz.uni-giessen.de/
1357	0	0	31	5822659	-77	850	-77	-77	-99	-99	d	2	2	25	1	2	1	0	0	0	0	-99	7	7	5	5	3	3	3	1	1	1	7	4	0	0	0	0	0	0	7	2	0	0	0	-99	-99	Mozilla/5.0 (Windows NT 10.0; Win64; x64) AppleWebKit/537.36 (KHTML, like Gecko) Chrome/89.0.4389.90 Safari/537.36 Edg/89.0.774.63	-99
1359	0	0	31	5822659	-77	1074	-77	-77	-99	-99	d	2	5	27	1	2	1	0	0	0	0	-99	6	7	5	5	1	1	1	1	1	1	7	5	5	6	6	4	5	0	6	4	4	2	2	-99	-99	Mozilla/5.0 (Macintosh; Intel Mac OS X 10_12_6) AppleWebKit/605.1.15 (KHTML, like Gecko) Version/12.1.2 Safari/605.1.15	-99
1360	0	0	31	5822659	-77	1220	-77	-77	-99	-99	d	5	3	20	2	2	1	0	0	0	0	-99	3	2	2	5	4	3	3	3	3	2	4	4	4	5	3	3	5	4	5	3	4	2	2	-99	-99	Mozilla/5.0 (iPhone; CPU iPhone OS 14_4_1 like Mac OS X) AppleWebKit/605.1.15 (KHTML, like Gecko) Version/14.0.3 Mobile/15E148 Safari/604.1	-99
1362	0	0	32	5822659	-77	-1	-77	-77	-99	-99	d	5	8	31	2	2	0	1	0	0	0	-99	7	7	4	4	7	5	4	5	3	2	7	4	4	4	3	4	4	4	2	6	4	1	1	-99	-99	Mozilla/5.0 (iPhone; CPU iPhone OS 14_4_1 like Mac OS X) AppleWebKit/605.1.15 (KHTML, like Gecko) Version/14.0.3 Mobile/15E148 Safari/604.1	-99
1364	0	0	31	5822659	-77	1516	-77	-77	-99	-99	d	2	8	33	1	2	0	1	0	0	0	-99	7	5	6	5	1	1	5	1	1	1	7	7	6	1	1	1	4	2	6	3	3	1	1	Von großer Bedeutung ist es für mich eine klare Kommunikation über wissenschaftliche Fakten vermittelt zu bekommen in wie weit das Impfprogramm und jede einzelne Impfung sich auswirkt. Es müssen sich beide Seiten angesehen werden und endlich Schluss mit Dogmatismus sein.	-99	Mozilla/5.0 (Macintosh; Intel Mac OS X 10_15_6) AppleWebKit/605.1.15 (KHTML, like Gecko) Version/14.0.2 Safari/605.1.15	-99
1365	0	0	31	5822659	-77	1549	-77	-77	-99	-99	d	2	8	21	2	2	1	1	0	0	0	-99	2	4	3	3	5	1	3	1	1	1	7	7	7	7	7	7	7	7	4	4	4	4	4	-99	-99	Mozilla/5.0 (Macintosh; Intel Mac OS X 10_15_6) AppleWebKit/605.1.15 (KHTML, like Gecko) Version/14.0.3 Safari/605.1.15	-99
1366	0	0	31	5822659	-77	977	-77	-77	-99	-99	d	2	8	23	2	2	1	0	0	0	0	-99	4	2	2	3	2	1	5	2	1	1	7	7	7	7	7	7	7	7	7	4	4	7	7	-99	-99	Mozilla/5.0 (Macintosh; Intel Mac OS X 10_15_6) AppleWebKit/605.1.15 (KHTML, like Gecko) Version/14.0.3 Safari/605.1.15	-99
1367	0	0	31	5822659	-77	1434	-77	-77	-99	-99	d	2	2	26	1	2	1	0	0	0	0	-99	7	7	5	5	1	1	1	1	1	1	6	6	6	6	5	4	5	5	4	4	4	2	2	-99	-99	Mozilla/5.0 (Macintosh; Intel Mac OS X 10_15_6) AppleWebKit/605.1.15 (KHTML, like Gecko) Version/14.0.3 Safari/605.1.15	https://wm.hrz.uni-giessen.de/horde/imp/dynamic.php?page=mailbox
1369	0	0	31	5822659	-77	1158	-77	-77	-99	-99	d	5	9	23	2	2	1	0	0	0	0	-99	5	7	5	4	3	3	3	1	2	1	7	5	6	7	4	2	6	6	6	4	5	4	4	-99	-99	Mozilla/5.0 (iPhone; CPU iPhone OS 14_4_2 like Mac OS X) AppleWebKit/605.1.15 (KHTML, like Gecko) Version/14.0.3 Mobile/15E148 Safari/604.1	-99
1368	0	0	31	5822659	-77	776	-77	-77	-99	-99	d	2	1	24	2	2	1	1	0	0	0	-99	6	5	5	5	0	0	0	0	0	0	0	0	0	0	0	0	0	0	0	0	0	0	0	-99	-99	Mozilla/5.0 (Macintosh; Intel Mac OS X 10_15_6) AppleWebKit/605.1.15 (KHTML, like Gecko) Version/14.0.3 Safari/605.1.15	https://wm.hrz.uni-giessen.de/horde/imp/dynamic.php?page=mailbox
1370	0	0	32	5822659	-77	-1	-77	-77	-99	-99	d	5	10	55	1	2	1	0	0	0	0	-99	1	1	2	2	0	0	0	0	0	0	0	0	0	0	0	0	0	0	0	0	0	0	0	-99	-99	Mozilla/5.0 (Android 10; Mobile; rv:87.0) Gecko/87.0 Firefox/87.0	-99
1371	0	0	31	5822659	-77	1082	-77	-77	-99	-99	d	2	7	22	2	2	1	0	0	0	0	-99	6	7	6	5	1	1	2	1	1	1	7	7	7	7	7	7	7	7	7	7	7	5	5	-99	-99	Mozilla/5.0 (iPhone; CPU iPhone OS 14_4 like Mac OS X) AppleWebKit/605.1.15 (KHTML, like Gecko) Version/14.0.3 Mobile/15E148 Safari/604.1	-99
1373	0	0	31	5822659	-77	1547	-77	-77	-99	-99	d	5	1	21	2	2	1	0	0	0	0	-99	3	2	2	2	0	0	0	0	0	0	0	0	0	0	0	0	0	0	0	0	0	0	0	-99	-99	Mozilla/5.0 (Linux; Android 9; ANE-LX1 Build/HUAWEIANE-L21; wv) AppleWebKit/537.36 (KHTML, like Gecko) Version/4.0 Chrome/89.0.4389.105 Mobile Safari/537.36 EdgW/1.0	-99
1374	0	0	31	5822659	-77	760	-77	-77	-99	-99	d	2	1	27	1	2	0	1	0	0	0	-99	7	7	7	7	0	0	0	0	0	0	0	0	0	0	0	0	0	0	0	0	0	0	0	-99	-99	Mozilla/5.0 (Macintosh; Intel Mac OS X 10_15_6) AppleWebKit/605.1.15 (KHTML, like Gecko) Version/14.0.3 Safari/605.1.15	-99
1375	0	0	31	5822659	-77	881	-77	-77	-99	-99	d	3	12	24	2	2	1	0	0	0	0	-99	6	6	5	5	2	2	5	5	2	2	7	6	6	4	4	4	5	6	4	6	6	3	3	-99	-99	Mozilla/5.0 (Macintosh; Intel Mac OS X 11_1_0) AppleWebKit/537.36 (KHTML, like Gecko) Chrome/88.0.4324.192 Safari/537.36	-99
1376	0	0	31	5822659	-77	1005	-77	-77	-99	-99	d	2	8	21	2	2	1	0	0	0	0	-99	7	7	5	5	2	2	2	2	2	2	6	6	6	7	6	7	7	7	6	7	5	3	3	-99	Viel zu lange. Viele Fragen waren zu ähnlich, wenn nicht sogar komplett identisch von der Aussage.	Mozilla/5.0 (Macintosh; Intel Mac OS X 10_15_7) AppleWebKit/605.1.15 (KHTML, like Gecko) Version/14.0.3 Safari/605.1.15	https://wm.hrz.uni-giessen.de/horde/imp/dynamic.php?page=mailbox
1377	0	0	31	5822659	-77	578	-77	-77	-99	-99	d	2	8	32	1	2	1	0	0	0	0	-99	6	7	7	7	1	1	6	3	1	1	6	6	7	5	6	2	7	6	6	5	7	3	3	-99	-99	Mozilla/5.0 (Windows NT 10.0; Win64; x64; rv:87.0) Gecko/20100101 Firefox/87.0	-99
1378	0	0	31	5822659	-77	1243	-77	-77	-99	-99	d	2	5	26	1	2	1	0	0	0	0	-99	6	6	6	5	3	2	2	2	2	1	6	7	6	6	4	3	6	5	6	5	4	5	4	-99	-99	Mozilla/5.0 (Windows NT 10.0; Win64; x64) AppleWebKit/537.36 (KHTML, like Gecko) Chrome/89.0.4389.90 Safari/537.36	-99
1379	0	0	31	5822659	-77	1068	-77	-77	-99	-99	d	2	3	21	2	2	0	1	0	0	0	-99	6	6	5	7	1	1	3	3	1	1	6	6	7	4	7	7	5	7	6	2	4	3	3	-99	-99	Mozilla/5.0 (iPhone; CPU iPhone OS 14_4_1 like Mac OS X) AppleWebKit/605.1.15 (KHTML, like Gecko) Version/14.0.3 Mobile/15E148 Safari/604.1	-99
1381	0	0	31	5822659	-77	1298	-77	-77	-99	-99	d	2	6	29	2	2	1	0	0	0	0	-99	5	6	7	7	2	1	3	2	1	1	6	7	7	6	5	2	7	7	4	6	5	3	3	-99	-99	Mozilla/5.0 (Linux; Android 8.1.0; SM-T580) AppleWebKit/537.36 (KHTML, like Gecko) Chrome/89.0.4389.105 Safari/537.36	-99
1382	0	0	31	5822659	-77	3142	-77	-77	-99	-99	d	2	5	23	2	2	0	0	0	0	1	WhatsApp Gruppe meines Semesters	2	1	1	5	3	1	5	2	2	1	7	6	5	5	4	4	6	6	5	4	4	5	6	-99	1. ich bin absolut für Impfungen! Dennoch finde ich es ethisch nicht vertretbar, jemanden zu zwingen, sich impfen zu lassen. Es sollte möglich sein, dass die Aufklärung gut und eindeutig genug ist, dass die meisten sich impfen lassen. Wenn dies nicht der Fall ist, müssen wir uns bessern! Aber zwang ist keine Lösung auch nicht bei Masern! Und wie gesagt ich habe alle Impfungen aber ich würde niema…	Mozilla/5.0 (iPhone; CPU iPhone OS 14_4_2 like Mac OS X) AppleWebKit/605.1.15 (KHTML, like Gecko) Version/14.0.3 Mobile/15E148 Safari/604.1	-99
1383	0	0	31	5812245	-77	18	-77	-77	-99	-99	d	1	-66	-66	-77	-77	-77	-77	-77	-77	-77	-66	-77	-77	-77	-77	-77	-77	-77	-77	-77	-77	-77	-77	-77	-77	-77	-77	-77	-77	-77	-77	-77	-77	-77	-66	-66	Mozilla/5.0 (Macintosh; Intel Mac OS X 10_15_6) AppleWebKit/605.1.15 (KHTML, like Gecko) Version/14.0.3 Safari/605.1.15	-99
1385	0	0	31	5822659	-77	1654	-77	-77	-99	-99	d	2	4	22	2	2	0	1	0	0	0	-99	5	5	2	2	2	2	5	3	5	3	7	4	4	4	4	4	4	4	4	4	4	4	4	-99	-99	Mozilla/5.0 (Windows NT 10.0; Win64; x64) AppleWebKit/537.36 (KHTML, like Gecko) Chrome/89.0.4389.90 Safari/537.36 Edg/89.0.774.63	https://webmail.stud.uni-giessen.de/
1384	0	0	31	5822659	-77	1017	-77	-77	-99	-99	d	2	3	26	1	2	1	1	0	0	0	-99	1	1	1	1	0	0	0	0	0	0	7	4	4	5	6	7	7	5	3	4	4	4	4	-99	-99	Mozilla/5.0 (Windows NT 10.0; Win64; x64) AppleWebKit/537.36 (KHTML, like Gecko) Chrome/89.0.4389.114 Safari/537.36	https://wm.hrz.uni-giessen.de/
1387	0	0	31	5812245	-77	9	-77	-77	-99	-99	d	1	-66	-66	-77	-77	-77	-77	-77	-77	-77	-66	-77	-77	-77	-77	-77	-77	-77	-77	-77	-77	-77	-77	-77	-77	-77	-77	-77	-77	-77	-77	-77	-77	-77	-66	-66	Mozilla/5.0 (Windows NT 10.0; Win64; x64) AppleWebKit/537.36 (KHTML, like Gecko) Chrome/89.0.4389.114 Safari/537.36	-99
1388	0	0	31	5822659	-77	1249	-77	-77	-99	-99	d	2	6	21	2	2	1	0	0	0	0	-99	4	5	2	6	2	1	3	2	4	4	7	6	7	7	7	4	7	4	4	4	4	4	4	-99	-99	Mozilla/5.0 (iPhone; CPU iPhone OS 14_3 like Mac OS X) AppleWebKit/605.1.15 (KHTML, like Gecko) Version/14.0.2 Mobile/15E148 Safari/604.1	-99
1389	0	0	31	5822659	-77	1237	-77	-77	-99	-99	d	2	9	24	1	2	0	1	0	0	0	-99	7	7	7	7	2	2	5	5	2	1	6	7	7	4	2	5	7	7	2	6	7	1	1	-99	-99	Mozilla/5.0 (Macintosh; Intel Mac OS X 11_2_3) AppleWebKit/537.36 (KHTML, like Gecko) Chrome/89.0.4389.90 Safari/537.36	-99
1390	0	0	31	5822659	-77	974	-77	-77	-99	-99	d	2	9	24	2	3	0	1	0	0	0	-99	2	2	2	2	4	4	4	4	4	4	5	5	5	6	6	6	7	7	6	6	7	5	5	-99	-99	Mozilla/5.0 (Windows NT 10.0; Win64; x64; rv:87.0) Gecko/20100101 Firefox/87.0	-99
1391	0	0	31	5812245	-77	6	-77	-77	-99	-99	d	1	-66	-66	-77	-77	-77	-77	-77	-77	-77	-66	-77	-77	-77	-77	-77	-77	-77	-77	-77	-77	-77	-77	-77	-77	-77	-77	-77	-77	-77	-77	-77	-77	-77	-66	-66	Mozilla/5.0 (Windows NT 10.0; Win64; x64; rv:87.0) Gecko/20100101 Firefox/87.0	-99
1393	0	0	31	5822659	-77	1022	-77	-77	-99	-99	d	2	8	22	2	2	1	0	0	0	0	-99	2	2	2	2	1	1	1	1	1	1	7	7	7	7	7	7	7	7	4	4	6	4	4	-99	-99	Mozilla/5.0 (Macintosh; Intel Mac OS X 10_11_6) AppleWebKit/537.36 (KHTML, like Gecko) Chrome/89.0.4389.90 Safari/537.36	https://wm.hrz.uni-giessen.de/
1392	0	0	31	5822659	-77	1137	-77	-77	-99	-99	d	2	7	29	2	2	1	0	0	0	0	-99	5	5	5	6	1	1	5	5	5	5	7	7	7	7	3	3	7	3	2	7	3	3	3	-99	-99	Mozilla/5.0 (Linux; Android 9; H4233) AppleWebKit/537.36 (KHTML, like Gecko) Chrome/89.0.4389.105 Mobile Safari/537.36	-99
1395	0	0	31	5822659	-77	1273	-77	-77	-99	-99	d	3	13	25	1	2	1	0	0	0	0	-99	6	6	5	6	4	4	5	5	2	3	6	4	4	3	5	3	4	5	3	4	4	3	3	-99	-99	Mozilla/5.0 (Windows NT 10.0; Win64; x64) AppleWebKit/537.36 (KHTML, like Gecko) Chrome/89.0.4389.90 Safari/537.36	https://webmail.stud.uni-giessen.de/
1396	0	0	31	5822659	-77	1247	-77	-77	-99	-99	d	2	3	23	2	2	0	1	0	0	0	-99	7	2	6	6	1	1	1	1	5	1	5	5	4	5	4	5	5	4	4	4	5	3	3	-99	-99	Mozilla/5.0 (Linux; Android 11; SM-A405FN) AppleWebKit/537.36 (KHTML, like Gecko) Chrome/88.0.4324.181 Mobile Safari/537.36 (Ecosia android@88.0.4324.181)	-99
1397	0	0	31	5822659	-77	1884	-77	-77	-99	-99	d	2	3	30	2	2	1	0	0	0	0	-99	3	5	5	6	1	1	1	1	1	1	7	7	6	5	5	5	5	6	4	4	5	4	4	-99	-99	Mozilla/5.0 (Windows NT 10.0; Win64; x64) AppleWebKit/537.36 (KHTML, like Gecko) Chrome/89.0.4389.90 Safari/537.36 Edg/89.0.774.63	-99
1398	0	0	31	5812245	-77	5	-77	-77	-99	-99	d	1	-66	-66	-77	-77	-77	-77	-77	-77	-77	-66	-77	-77	-77	-77	-77	-77	-77	-77	-77	-77	-77	-77	-77	-77	-77	-77	-77	-77	-77	-77	-77	-77	-77	-66	-66	Mozilla/5.0 (Linux; Android 10; SM-A405FN) AppleWebKit/537.36 (KHTML, like Gecko) Chrome/89.0.4389.105 Mobile Safari/537.36	-99
1400	0	0	31	5822659	-77	699	-77	-77	-99	-99	d	2	12	32	1	2	1	0	0	0	0	-99	7	7	7	6	5	5	5	5	5	3	7	5	6	5	5	5	6	4	6	3	4	4	5	-99	-99	Mozilla/5.0 (Windows NT 10.0; Win64; x64) AppleWebKit/537.36 (KHTML, like Gecko) Chrome/89.0.4389.114 Safari/537.36	-99
1401	0	0	31	5822659	-77	1135	-77	-77	-99	-99	d	2	5	22	2	2	1	0	0	0	0	-99	4	6	5	3	1	1	1	1	1	1	7	7	7	4	5	5	6	7	1	1	7	4	4	-99	-99	Mozilla/5.0 (iPhone; CPU iPhone OS 14_4_2 like Mac OS X) AppleWebKit/605.1.15 (KHTML, like Gecko) Version/14.0.3 Mobile/15E148 Safari/604.1	-99
1402	0	0	31	5822659	-77	1140	-77	-77	-99	-99	d	2	9	24	1	2	1	0	0	0	0	-99	7	7	5	4	4	4	5	3	4	2	5	2	6	6	5	6	5	3	4	6	6	1	1	-99	-99	Mozilla/5.0 (Linux; Android 10; VOG-L29) AppleWebKit/537.36 (KHTML, like Gecko) Chrome/88.0.4324.181 Mobile Safari/537.36	-99
1403	0	0	31	5822659	-77	1232	-77	-77	-99	-99	d	2	5	25	2	2	1	0	0	0	0	-99	5	5	3	3	3	2	2	1	1	1	6	6	6	6	6	6	6	6	2	6	2	2	2	-99	-99	Mozilla/5.0 (iPhone; CPU iPhone OS 14_4_2 like Mac OS X) AppleWebKit/605.1.15 (KHTML, like Gecko) Version/14.0.3 Mobile/15E148 Safari/604.1	-99
1404	0	0	31	5822659	-77	2795	-77	-77	-99	-99	d	2	9	26	2	2	1	0	0	0	0	-99	7	7	6	6	5	2	6	3	4	2	7	7	7	7	3	6	6	5	4	6	2	3	3	-99	-99	Mozilla/5.0 (Linux; Android 9; LLD-L31) AppleWebKit/537.36 (KHTML, like Gecko) Chrome/89.0.4389.105 Mobile Safari/537.36	https://wm.hrz.uni-giessen.de/
1405	0	0	31	5812245	-77	21	-77	-77	-99	-99	d	1	-66	-66	-77	-77	-77	-77	-77	-77	-77	-66	-77	-77	-77	-77	-77	-77	-77	-77	-77	-77	-77	-77	-77	-77	-77	-77	-77	-77	-77	-77	-77	-77	-77	-66	-66	Mozilla/5.0 (Windows NT 10.0; Win64; x64) AppleWebKit/537.36 (KHTML, like Gecko) Chrome/89.0.4389.114 Safari/537.36	-99
1406	0	0	32	5822659	-77	-1	-77	-77	-99	-99	d	2	10	25	1	2	1	0	0	0	0	-99	7	7	6	6	2	2	4	4	4	3	7	7	6	5	5	5	5	5	4	2	6	4	4	-99	-99	Mozilla/5.0 (Macintosh; Intel Mac OS X 11_0_1) AppleWebKit/537.36 (KHTML, like Gecko) Chrome/89.0.4389.114 Safari/537.36	https://webmail.stud.uni-giessen.de/
1407	0	0	31	5822659	-77	1391	-77	-77	-99	-99	d	2	4	28	2	2	1	0	0	0	0	-99	2	5	5	5	3	5	3	2	3	2	7	7	3	1	1	1	2	3	6	4	4	4	2	-99	-99	Mozilla/5.0 (iPhone; CPU iPhone OS 14_4_1 like Mac OS X) AppleWebKit/605.1.15 (KHTML, like Gecko) Version/14.0.3 Mobile/15E148 Safari/604.1	-99
1408	0	0	31	5822659	-77	1302	-77	-77	-99	-99	d	2	2	18	2	2	1	1	0	0	0	-99	7	7	6	6	1	1	1	1	1	1	7	7	7	7	7	7	7	7	7	7	7	7	7	-99	-99	Mozilla/5.0 (Macintosh; Intel Mac OS X 10_15_6) AppleWebKit/605.1.15 (KHTML, like Gecko) Version/14.0.3 Safari/605.1.15	https://wm.hrz.uni-giessen.de/horde/imp/dynamic.php?page=mailbox
1409	0	0	31	5822659	-77	1201	-77	-77	-99	-99	d	2	10	25	2	2	1	0	0	0	0	-99	5	6	5	5	4	4	4	3	3	1	7	7	6	4	5	5	6	7	4	4	6	6	6	-99	-99	Mozilla/5.0 (Linux; Android 9; ANE-LX1) AppleWebKit/537.36 (KHTML, like Gecko) Chrome/89.0.4389.105 Mobile Safari/537.36	android-app://com.google.android.gm/
1410	0	0	31	5822659	-77	1662	-77	-77	-99	-99	d	2	7	27	2	2	1	0	0	0	0	-99	6	5	3	3	1	1	1	1	1	1	6	6	4	4	2	2	3	2	2	6	3	1	1	Als grade aktuelles Thema überhaupt in irgendeinerweise in die aktuellen Fachsemester einbauen	Auch Unipräsenz-Veranstaltungen brauchen ein Hygienekonzept!	Mozilla/5.0 (Macintosh; Intel Mac OS X 10.15; rv:87.0) Gecko/20100101 Firefox/87.0	-99
1412	0	0	31	5812245	-77	9	-77	-77	-99	-99	d	1	-66	-66	-77	-77	-77	-77	-77	-77	-77	-66	-77	-77	-77	-77	-77	-77	-77	-77	-77	-77	-77	-77	-77	-77	-77	-77	-77	-77	-77	-77	-77	-77	-77	-66	-66	Mozilla/5.0 (iPhone; CPU iPhone OS 14_4 like Mac OS X) AppleWebKit/605.1.15 (KHTML, like Gecko) Version/14.0.3 Mobile/15E148 Safari/604.1	-99
1413	0	0	31	5822659	-77	1751	-77	-77	-99	-99	d	5	9	26	2	2	1	0	0	0	0	-99	5	5	4	5	1	1	2	2	2	1	7	6	6	7	1	6	6	6	4	6	5	2	2	-99	Studierenden und andere, die bereits die erste Impfung mit Astrazeneca erhalten haben, sollten auch diesen Impfstoff für die 2. Impfung erhalten. Experimente, einen Impfstoff eines anderen Herstellers zu erhalten sind nicht ausreichend erprobt und sollten daher nicht an den Studierenden erprobt werden, welche vorab in ihrer Impfstoffwahl stark eingeschränkt waren. Die enorme Rufschädigung von Ast…	Mozilla/5.0 (Windows NT 10.0; Win64; x64; rv:87.0) Gecko/20100101 Firefox/87.0	https://wm.hrz.uni-giessen.de/
1414	0	0	31	5822659	-77	1741	-77	-77	-99	-99	d	2	18	31	2	2	0	1	0	0	0	-99	6	6	6	6	1	1	3	5	5	1	7	7	7	7	7	7	7	7	4	4	7	7	7	-99	-99	Mozilla/5.0 (Linux; Android 9; SM-G950F) AppleWebKit/537.36 (KHTML, like Gecko) Chrome/89.0.4389.105 Mobile Safari/537.36	android-app://com.google.android.gm/
1415	0	0	31	5822659	-77	848	-77	-77	-99	-99	d	2	6	28	1	2	1	0	0	0	0	-99	6	6	6	6	2	1	2	1	2	2	7	6	5	6	4	5	6	6	3	6	7	6	6	-99	-99	Mozilla/5.0 (Macintosh; Intel Mac OS X 10_15_7) AppleWebKit/605.1.15 (KHTML, like Gecko) Version/14.0.2 Safari/605.1.15	-99
1416	0	0	31	5822659	-77	959	-77	-77	-99	-99	d	2	5	27	2	2	1	0	0	0	0	-99	5	5	5	6	1	1	1	1	1	1	7	7	7	7	6	7	7	7	1	7	4	2	3	-99	-99	Mozilla/5.0 (iPhone; CPU iPhone OS 14_4_2 like Mac OS X) AppleWebKit/605.1.15 (KHTML, like Gecko) Version/14.0.3 Mobile/15E148 Safari/604.1	-99
1417	0	0	31	5822659	-77	1075	-77	-77	-99	-99	d	5	1	24	2	2	0	1	0	0	0	-99	6	7	7	7	4	4	4	4	4	4	7	7	7	7	7	7	7	7	1	7	4	1	1	-99	-99	Mozilla/5.0 (Macintosh; Intel Mac OS X 10_15_6) AppleWebKit/605.1.15 (KHTML, like Gecko) Version/14.0.3 Safari/605.1.15	-99
1418	0	0	31	5822659	-77	974	-77	-77	-99	-99	d	2	3	19	2	3	1	0	0	0	0	-99	5	5	4	4	3	3	5	3	3	3	7	7	7	7	7	7	7	7	6	6	7	5	5	-99	-99	Mozilla/5.0 (Macintosh; Intel Mac OS X 10_15_4) AppleWebKit/605.1.15 (KHTML, like Gecko) Version/13.1 Safari/605.1.15	-99
1419	0	0	31	5822659	-77	1112	-77	-77	-99	-99	d	2	3	21	2	2	1	0	0	0	0	-99	6	5	2	3	5	3	5	4	2	2	7	6	7	5	7	7	7	4	2	5	7	5	6	-99	-99	Mozilla/5.0 (Windows NT 10.0; Win64; x64; rv:87.0) Gecko/20100101 Firefox/87.0	-99
1421	0	0	31	5822659	-77	1090	-77	-77	-99	-99	d	2	4	22	2	2	1	0	0	0	0	-99	6	6	5	5	1	1	1	1	1	1	5	2	5	6	4	5	6	6	2	6	3	4	4	-99	-99	Mozilla/5.0 (Windows NT 10.0; Win64; x64) AppleWebKit/537.36 (KHTML, like Gecko) Chrome/89.0.4389.90 Safari/537.36 Edg/89.0.774.63	https://webmail.stud.uni-giessen.de/
1422	0	0	31	5822659	-77	1431	-77	-77	-99	-99	d	2	5	28	2	2	1	0	0	0	0	-99	4	5	2	2	4	4	4	4	4	4	4	4	0	0	0	0	0	0	0	0	0	0	0	war bis jetzt nur in der Vorklinik, kann keine Angaben machen	-99	Mozilla/5.0 (Windows NT 10.0; Win64; x64; rv:86.0) Gecko/20100101 Firefox/86.0	https://outlook.live.com/
1423	0	0	31	5822659	-77	1728	-77	-77	-99	-99	d	2	8	24	2	2	0	0	0	0	1	i.A. Lokalgruppe Hamburg „Impf Dich	5	5	4	4	3	3	5	3	3	3	5	5	4	5	4	4	5	5	3	5	3	4	3	-99	-99	Mozilla/5.0 (Windows NT 10.0; Win64; x64) AppleWebKit/537.36 (KHTML, like Gecko) Chrome/89.0.4389.114 Safari/537.36	https://wm.hrz.uni-giessen.de/
1424	0	0	31	5822659	-77	1023	-77	-77	-99	-99	d	2	6	26	2	2	1	0	0	0	0	-99	7	7	5	2	1	1	1	1	1	1	7	7	7	7	7	6	7	7	2	7	7	4	4	-99	-99	Mozilla/5.0 (Windows NT 10.0; Win64; x64) AppleWebKit/537.36 (KHTML, like Gecko) Chrome/89.0.4389.114 Safari/537.36	-99
1426	0	0	31	5822659	-77	2957	-77	-77	-99	-99	d	5	3	20	2	2	1	0	0	0	0	-99	3	2	4	4	2	2	6	6	0	0	7	7	5	5	2	3	5	4	5	1	4	4	0	-99	-99	Mozilla/5.0 (Linux; Android 8.0.0; SAMSUNG SM-A520F) AppleWebKit/537.36 (KHTML, like Gecko) SamsungBrowser/13.2 Chrome/83.0.4103.106 Mobile Safari/537.36	-99
1427	0	0	31	5822659	-77	982	-77	-77	-99	-99	d	2	10	24	2	2	1	0	0	0	0	-99	7	7	5	5	1	1	7	2	1	1	7	7	7	7	7	7	7	7	7	7	7	3	3	-99	-99	Mozilla/5.0 (iPhone; CPU iPhone OS 14_4 like Mac OS X) AppleWebKit/605.1.15 (KHTML, like Gecko) Version/14.0.3 Mobile/15E148 Safari/604.1	https://webmail.stud.uni-giessen.de/horde/imp/smartmobile.php
1428	0	0	31	5822659	-77	1048	-77	-77	-99	-99	d	2	4	22	2	2	1	0	0	0	0	-99	6	6	5	5	1	1	5	4	1	1	7	6	7	7	6	6	7	7	4	4	7	6	6	-99	-99	Mozilla/5.0 (Macintosh; Intel Mac OS X 10_15_6) AppleWebKit/605.1.15 (KHTML, like Gecko) Version/14.0.3 Safari/605.1.15	-99
1429	0	0	31	5812245	-77	25	-77	-77	-99	-99	d	1	-66	-66	-77	-77	-77	-77	-77	-77	-77	-66	-77	-77	-77	-77	-77	-77	-77	-77	-77	-77	-77	-77	-77	-77	-77	-77	-77	-77	-77	-77	-77	-77	-77	-66	-66	Mozilla/5.0 (Windows NT 10.0; Win64; x64) AppleWebKit/537.36 (KHTML, like Gecko) Chrome/89.0.4389.114 Safari/537.36	-99
1432	0	0	31	5822659	-77	1308	-77	-77	-99	-99	d	2	1	21	1	2	1	0	0	0	0	-99	5	5	5	6	4	0	0	0	0	0	5	6	5	5	6	3	4	5	3	3	3	3	3	Ich stehe am Anfang meines Medizinstudiums, Beginn erst jetzt im April und habe die letzten 2 1/2 Jahre eine Ausbildung zum Geusndheits- und Krankenpfleger gemacht. Ich kann zu den vermittelten Inhalten im Studium nichts sagen.	Ich stehe am Anfang meines Medizinstudiums und habe seit August 2018 eine Ausbildung zum Gesindheits- und Krankenpfleger gemacht. Dementsprechend habe ich im Krankenhaus unter engen Pat. Kontakt gearbeitet, was sich auf meine Priorisierung und auch meinen Erhalt der Impfung ausgewirkt hat. Das sie meine Antworten in dem richtigen Kontext einordnen können.	Mozilla/5.0 (iPhone; CPU iPhone OS 14_4_1 like Mac OS X) AppleWebKit/605.1.15 (KHTML, like Gecko) Version/14.0.3 Mobile/15E148 Safari/604.1	-99
1433	0	0	32	5822659	-77	-1	-77	-77	-99	-99	d	2	8	23	2	2	1	0	0	0	0	-99	7	7	5	5	3	3	4	6	5	5	6	5	3	4	2	3	5	3	1	7	4	3	3	Allgemeine Informationen	War ein bisschen zu lang	Mozilla/5.0 (Linux; Android 10; HRY-LX1T) AppleWebKit/537.36 (KHTML, like Gecko) Chrome/89.0.4389.105 Mobile Safari/537.36	-99
1434	0	0	31	5822659	-77	825	-77	-77	-99	-99	d	2	2	19	2	2	1	0	0	0	0	-99	1	1	4	4	1	1	1	1	1	1	7	7	7	7	4	6	7	5	4	4	4	4	4	-99	-99	Mozilla/5.0 (Macintosh; Intel Mac OS X 10_15_6) AppleWebKit/605.1.15 (KHTML, like Gecko) Version/14.0.3 Safari/605.1.15	-99
1435	0	0	31	5822659	-77	1315	-77	-77	-99	-99	d	2	5	21	2	2	1	0	0	0	0	-99	3	3	3	2	3	2	3	1	1	1	5	5	3	3	2	2	5	4	5	5	5	4	4	-99	-99	Mozilla/5.0 (iPhone; CPU iPhone OS 14_4_2 like Mac OS X) AppleWebKit/605.1.15 (KHTML, like Gecko) Version/14.0.3 Mobile/15E148 Safari/604.1	-99
1436	0	0	31	5822659	-77	2018	-77	-77	-99	-99	d	2	5	26	1	2	1	0	0	0	0	-99	6	6	4	5	0	0	0	0	0	0	0	0	0	0	0	0	0	0	0	0	0	0	0	-99	-99	Mozilla/5.0 (Linux; Android 9; BND-L21) AppleWebKit/537.36 (KHTML, like Gecko) Chrome/89.0.4389.105 Mobile Safari/537.36	-99
1437	0	0	31	5822659	-77	2043	-77	-77	-99	-99	d	2	3	22	1	2	1	0	0	0	0	-99	5	6	4	3	1	1	1	1	1	1	6	5	5	5	3	3	5	5	3	4	4	4	4	-99	-99	Mozilla/5.0 (Macintosh; Intel Mac OS X 10_15_6) AppleWebKit/605.1.15 (KHTML, like Gecko) Version/14.0.3 Safari/605.1.15	https://wm.hrz.uni-giessen.de/horde/imp/dynamic.php?page=mailbox
1438	0	0	31	5822659	-77	842	-77	-77	-99	-99	d	2	10	23	2	2	0	1	0	0	0	-99	3	2	3	3	1	1	5	2	1	1	7	7	7	7	7	7	0	7	7	3	5	4	4	-99	-99	Mozilla/5.0 (Linux; Android 8.0.0; PIC-LX9) AppleWebKit/537.36 (KHTML, like Gecko) Chrome/89.0.4389.105 Mobile Safari/537.36	https://wm.hrz.uni-giessen.de/
1439	0	0	31	5822659	-77	1179	-77	-77	-99	-99	d	2	7	30	2	2	1	0	0	0	0	-99	5	5	4	4	2	2	3	2	2	3	7	6	5	5	5	5	5	5	5	2	5	4	4	-99	-99	Mozilla/5.0 (Macintosh; Intel Mac OS X 10_15_6) AppleWebKit/605.1.15 (KHTML, like Gecko) Version/14.0.3 Safari/605.1.15	-99
1440	0	0	31	5822659	-77	1445	-77	-77	-99	-99	d	2	9	25	2	2	1	0	0	0	0	-99	5	5	2	2	1	1	6	5	3	1	6	5	5	6	5	5	6	6	5	5	6	5	5	-99	-99	Mozilla/5.0 (Windows NT 10.0; Win64; x64; rv:87.0) Gecko/20100101 Firefox/87.0	https://email.t-online.de/
1441	0	0	31	5822659	-77	1437	-77	-77	-99	-99	d	2	2	27	1	2	1	0	0	0	0	-99	6	6	6	6	4	4	4	4	4	4	6	6	7	7	7	7	7	7	4	4	7	4	4	-99	-99	Mozilla/5.0 (Windows NT 10.0; Win64; x64; rv:87.0) Gecko/20100101 Firefox/87.0	-99
1442	0	0	31	5822659	-77	1407	-77	-77	-99	-99	d	2	8	22	2	2	1	0	0	0	0	-99	6	6	4	5	2	1	1	2	0	0	0	0	0	0	0	0	0	0	0	0	0	0	0	-99	-99	Mozilla/5.0 (Windows NT 10.0; Win64; x64) AppleWebKit/537.36 (KHTML, like Gecko) Chrome/89.0.4389.90 Safari/537.36	https://wm.hrz.uni-giessen.de/
1444	0	0	31	5812245	-77	8	-77	-77	-99	-99	d	1	-66	-66	-77	-77	-77	-77	-77	-77	-77	-66	-77	-77	-77	-77	-77	-77	-77	-77	-77	-77	-77	-77	-77	-77	-77	-77	-77	-77	-77	-77	-77	-77	-77	-66	-66	Mozilla/5.0 (Linux; Android 10; SM-A715F) AppleWebKit/537.36 (KHTML, like Gecko) Chrome/89.0.4389.105 Mobile Safari/537.36	-99
1446	0	0	31	5822659	-77	1084	-77	-77	-99	-99	d	2	2	20	2	2	0	1	0	0	0	-99	6	6	5	3	2	3	1	1	1	1	5	4	5	5	7	4	4	7	7	4	5	2	2	-99	-99	Mozilla/5.0 (Windows NT 10.0; Win64; x64) AppleWebKit/537.36 (KHTML, like Gecko) Chrome/89.0.4389.114 Safari/537.36 Edg/89.0.774.68	-99
1447	0	0	31	5822659	-77	1417	-77	-77	-99	-99	d	2	5	21	2	2	1	0	0	0	0	-99	6	6	4	4	1	1	4	1	1	1	7	6	5	5	4	3	6	6	6	4	5	4	4	-99	-99	Mozilla/5.0 (Android 10; Mobile; rv:87.0) Gecko/87.0 Firefox/87.0	-99
1448	0	0	31	5812245	-77	13	-77	-77	-99	-99	d	4	-66	-66	-77	-77	-77	-77	-77	-77	-77	-66	-77	-77	-77	-77	-77	-77	-77	-77	-77	-77	-77	-77	-77	-77	-77	-77	-77	-77	-77	-77	-77	-77	-77	-66	-66	Mozilla/5.0 (Windows NT 10.0; Win64; x64) AppleWebKit/537.36 (KHTML, like Gecko) Chrome/89.0.4389.90 Safari/537.36	-99
1450	0	0	31	5822659	-77	1318	-77	-77	-99	-99	d	2	7	23	1	2	1	0	0	0	0	-99	6	6	4	6	1	1	3	1	1	1	7	7	7	7	6	2	7	7	7	2	4	3	3	-99	-99	Mozilla/5.0 (Linux; Android 9; SAMSUNG SM-G950F) AppleWebKit/537.36 (KHTML, like Gecko) SamsungBrowser/13.2 Chrome/83.0.4103.106 Mobile Safari/537.36	https://webmail.stud.uni-giessen.de/horde/imp/smartmobile.php
1451	0	0	31	5822659	-77	1028	-77	-77	-99	-99	d	2	4	28	1	2	0	1	0	0	0	-99	6	6	5	4	3	2	2	2	2	2	6	6	5	6	6	5	6	4	3	5	1	1	3	-99	-99	Mozilla/5.0 (iPhone; CPU iPhone OS 14_4_2 like Mac OS X) AppleWebKit/605.1.15 (KHTML, like Gecko) Version/14.0.3 Mobile/15E148 Safari/604.1	-99
1453	0	0	31	5822659	-77	1663	-77	-77	-99	-99	d	2	9	24	2	2	1	1	0	0	0	-99	2	2	2	2	1	1	3	1	1	1	7	7	7	7	7	7	7	7	7	7	7	7	7	-99	-99	Mozilla/5.0 (Windows NT 10.0; Win64; x64) AppleWebKit/537.36 (KHTML, like Gecko) Chrome/89.0.4389.90 Safari/537.36 Edg/89.0.774.63	https://wm.hrz.uni-giessen.de/
1452	0	0	31	5822659	-77	1051	-77	-77	-99	-99	d	2	4	21	2	2	1	0	0	0	0	-99	4	5	4	4	1	1	1	1	1	1	7	7	7	7	7	7	7	7	4	7	4	1	1	-99	-99	Mozilla/5.0 (Linux; Android 11; SM-G780F) AppleWebKit/537.36 (KHTML, like Gecko) Chrome/89.0.4389.105 Mobile Safari/537.36	https://wm.hrz.uni-giessen.de/
1455	0	0	31	5822659	-77	898	-77	-77	-99	-99	d	2	8	28	2	2	0	1	0	0	0	-99	2	3	6	5	7	2	2	2	2	3	7	7	5	5	5	2	6	6	4	3	5	3	3	-99	-99	Mozilla/5.0 (Macintosh; Intel Mac OS X 10_15_6) AppleWebKit/605.1.15 (KHTML, like Gecko) Version/14.0.3 Safari/605.1.15	-99
1457	0	0	31	5822659	-77	1269	-77	-77	-99	-99	d	2	4	22	2	2	1	0	0	0	0	-99	7	7	5	6	2	1	1	1	2	1	6	5	6	6	4	5	6	6	4	4	6	4	4	-99	-99	Mozilla/5.0 (Macintosh; Intel Mac OS X 10_15_6) AppleWebKit/605.1.15 (KHTML, like Gecko) Version/14.0.3 Safari/605.1.15	https://wm.hrz.uni-giessen.de/horde/imp/dynamic.php?page=mailbox
1458	0	0	31	5822659	-77	1438	-77	-77	-99	-99	d	5	5	21	2	2	1	0	0	0	0	-99	5	5	2	2	2	2	2	4	5	4	4	5	5	4	4	4	4	4	4	4	4	4	4	-99	-99	Mozilla/5.0 (iPhone; CPU iPhone OS 12_5_1 like Mac OS X) AppleWebKit/605.1.15 (KHTML, like Gecko) Version/12.1.2 Mobile/15E148 Safari/604.1	-99
1459	0	0	31	5822659	-77	809	-77	-77	-99	-99	d	2	2	20	2	2	1	0	0	0	0	-99	5	6	2	2	4	2	3	0	0	0	0	0	0	0	0	0	0	0	0	0	0	0	0	-99	-99	Mozilla/5.0 (Macintosh; Intel Mac OS X 10_15_4) AppleWebKit/605.1.15 (KHTML, like Gecko) Version/13.1.2 Safari/605.1.15	https://wm.hrz.uni-giessen.de/horde/imp/dynamic.php?page=mailbox
1460	0	0	31	5822659	-77	977	-77	-77	-99	-99	d	2	12	31	2	2	1	0	0	0	0	-99	6	6	3	6	0	4	2	3	2	3	7	6	4	5	1	3	5	4	6	6	6	1	1	-99	-99	Mozilla/5.0 (Macintosh; Intel Mac OS X 10.15; rv:86.0) Gecko/20100101 Firefox/86.0	https://student.uniklinikum-leipzig.de/
1461	0	0	31	5822659	-77	1181	-77	-77	-99	-99	d	2	5	21	2	2	1	0	0	0	0	-99	6	6	2	5	2	2	5	1	1	1	7	7	5	5	2	3	3	6	7	6	6	2	2	-99	-99	Mozilla/5.0 (Macintosh; Intel Mac OS X 10_15_6) AppleWebKit/605.1.15 (KHTML, like Gecko) Version/14.0.3 Safari/605.1.15	https://student.uniklinikum-leipzig.de/studium/allgemeines_interessantes.php
1462	0	0	31	5822659	-77	1482	-77	-77	-99	-99	d	2	4	19	2	2	1	0	0	0	0	-99	5	5	5	5	2	2	3	3	3	3	5	4	4	4	2	2	2	5	2	4	3	2	2	-99	-99	Mozilla/5.0 (Macintosh; Intel Mac OS X 10_15_6) AppleWebKit/605.1.15 (KHTML, like Gecko) Version/14.0.3 Safari/605.1.15	-99
1464	0	0	31	5822659	-77	573	-77	-77	-99	-99	d	2	2	29	2	2	1	0	0	0	0	-99	4	4	3	3	3	3	3	3	3	3	4	4	4	4	4	7	4	4	1	7	1	1	1	-99	-99	Mozilla/5.0 (Windows NT 10.0; WOW64) AppleWebKit/537.36 (KHTML, like Gecko) Chrome/88.0.4324.96 Safari/537.36	https://wm.hrz.uni-giessen.de/
1465	0	0	31	5822659	-77	1123	-77	-77	-99	-99	d	5	3	21	2	2	1	0	0	0	0	-99	6	5	4	6	3	6	0	2	2	2	6	5	6	6	5	4	6	5	6	3	5	3	3	-99	-99	Mozilla/5.0 (Windows NT 10.0; Win64; x64; rv:87.0) Gecko/20100101 Firefox/87.0	https://wm.hrz.uni-giessen.de/
1466	0	0	31	5822659	-77	970	-77	-77	-99	-99	d	2	6	23	2	2	1	0	0	0	0	-99	7	7	6	6	5	1	4	5	2	1	6	6	7	7	6	4	7	7	4	4	4	2	2	-99	-99	Mozilla/5.0 (Linux; Android 10; motorola one vision) AppleWebKit/537.36 (KHTML, like Gecko) Chrome/81.0.4044.111 Mobile Safari/537.36	https://wm.hrz.uni-giessen.de/horde/imp/smartmobile.php
1467	0	0	31	5822659	-77	853	-77	-77	-99	-99	d	2	10	23	1	2	1	0	0	0	0	-99	7	6	6	5	1	1	5	1	2	2	6	4	5	4	1	1	3	6	4	4	4	2	2	-99	-99	Mozilla/5.0 (iPhone; CPU iPhone OS 14_4_2 like Mac OS X) AppleWebKit/605.1.15 (KHTML, like Gecko) Version/14.0.3 Mobile/15E148 Safari/604.1	-99
1468	0	0	31	5822659	-77	1500	-77	-77	-99	-99	d	2	10	23	2	2	1	0	0	0	0	-99	1	1	1	1	5	3	6	6	5	4	6	7	5	3	3	1	4	5	5	3	4	1	1	-99	-99	Mozilla/5.0 (Windows NT 10.0; Win64; x64) AppleWebKit/537.36 (KHTML, like Gecko) Chrome/89.0.4389.114 Safari/537.36 Edg/89.0.774.68	https://webmail.stud.uni-giessen.de/
1469	0	0	31	5822659	-77	1025	-77	-77	-99	-99	d	2	9	25	2	2	1	0	0	0	0	-99	5	4	2	3	3	1	5	2	1	1	6	6	6	6	5	5	5	6	6	6	6	4	5	-99	-99	Mozilla/5.0 (Windows NT 10.0; Win64; x64) AppleWebKit/537.36 (KHTML, like Gecko) Chrome/89.0.4389.90 Safari/537.36 Edg/89.0.774.63	https://webmail.stud.uni-giessen.de/
1470	0	0	31	5822659	-77	1172	-77	-77	-99	-99	d	2	7	22	2	2	1	0	0	0	0	-99	5	5	5	5	5	5	6	6	2	2	6	6	4	3	1	1	5	5	4	4	4	3	2	-99	-99	Mozilla/5.0 (Macintosh; Intel Mac OS X 10_15_6) AppleWebKit/605.1.15 (KHTML, like Gecko) Version/14.0.3 Safari/605.1.15	https://wm.hrz.uni-giessen.de/horde/imp/dynamic.php?page=mailbox
1472	0	0	31	5822659	-77	2260	-77	-77	-99	-99	d	2	10	25	1	2	1	0	0	0	0	-99	1	1	1	1	1	1	5	2	1	1	7	7	7	7	3	1	7	3	7	1	1	7	7	-99	-99	Mozilla/5.0 (Windows NT 10.0; Win64; x64; rv:87.0) Gecko/20100101 Firefox/87.0	https://webmail.stud.uni-giessen.de/
1474	0	0	31	5822659	-77	1036	-77	-77	-99	-99	d	2	3	20	2	1	1	1	0	0	0	-99	7	7	7	7	2	2	2	2	2	2	7	7	7	7	7	7	7	7	5	6	7	4	4	-99	-99	Mozilla/5.0 (iPhone; CPU iPhone OS 14_4_2 like Mac OS X) AppleWebKit/605.1.15 (KHTML, like Gecko) Version/14.0.3 Mobile/15E148 Safari/604.1	https://wm.hrz.uni-giessen.de/horde/imp/smartmobile.php
1475	0	0	31	5822659	-77	1848	-77	-77	-99	-99	d	2	8	22	2	2	1	1	0	0	0	-99	5	5	4	4	5	3	7	6	6	6	7	6	6	6	5	5	6	5	4	4	4	4	4	-99	-99	Mozilla/5.0 (Windows NT 10.0; Win64; x64; rv:87.0) Gecko/20100101 Firefox/87.0	https://student.uniklinikum-leipzig.de/
1477	0	0	31	5822659	-77	2743	-77	-77	-99	-99	d	2	10	24	2	2	1	0	0	0	0	-99	5	7	6	6	4	4	6	6	6	1	7	7	7	7	7	7	7	7	7	7	7	7	7	-99	Sehr geehrtes Team der Impfumfrage, sehr gerne nehme ich an ihrem Umfrage-bogen teil. Leider finde ich den Aufbau an einigen Stellen nicht differenziert genug und tue mich daher schwer ihn meiner Einstellung gerecht zu beantworten. Das finde ich sehr schade, da ich fest der Überzeugung bin, dass solche Umfragen sehr wichtig sind. Hier ein paar Beispiele: Wie hoch schätzen Sie die Wahrscheinlichke…	Mozilla/5.0 (Windows NT 10.0; Win64; x64; rv:87.0) Gecko/20100101 Firefox/87.0	https://webmail.stud.uni-giessen.de/
1478	0	0	32	5822659	-77	-1	-77	-77	-99	-99	d	2	4	21	2	2	0	1	0	0	0	-99	5	4	2	3	1	1	1	1	1	1	7	4	5	4	6	5	5	5	0	0	0	0	0	-99	-99	Mozilla/5.0 (Windows NT 10.0; Win64; x64; rv:87.0) Gecko/20100101 Firefox/87.0	https://wm.hrz.uni-giessen.de/
1479	0	0	31	5812245	-77	15	-77	-77	-99	-99	d	1	-66	-66	-77	-77	-77	-77	-77	-77	-77	-66	-77	-77	-77	-77	-77	-77	-77	-77	-77	-77	-77	-77	-77	-77	-77	-77	-77	-77	-77	-77	-77	-77	-77	-66	-66	Mozilla/5.0 (Windows NT 10.0; Win64; x64) AppleWebKit/537.36 (KHTML, like Gecko) Chrome/89.0.4389.90 Safari/537.36 Edg/89.0.774.63	https://wm.hrz.uni-giessen.de/
1480	0	0	31	5822659	-77	1282	-77	-77	-99	-99	d	2	3	22	2	2	1	0	0	0	0	-99	7	7	7	7	2	2	2	2	2	2	7	6	4	4	5	3	5	4	4	4	4	4	4	-99	-99	Mozilla/5.0 (Windows NT 10.0; Win64; x64; rv:87.0) Gecko/20100101 Firefox/87.0	https://wm.hrz.uni-giessen.de/
1481	0	0	31	5822659	-77	862	-77	-77	-99	-99	d	2	3	20	2	2	1	0	0	0	0	-99	3	5	3	4	2	2	1	1	1	1	7	7	7	7	7	7	7	7	7	3	5	3	3	-99	-99	Mozilla/5.0 (Windows NT 10.0; Win64; x64; rv:87.0) Gecko/20100101 Firefox/87.0	-99
1483	0	0	31	5822659	-77	780	-77	-77	-99	-99	d	2	10	26	2	2	1	0	0	0	0	-99	5	4	6	6	2	2	5	5	3	2	6	5	4	4	3	3	5	5	5	4	4	3	3	-99	-99	Mozilla/5.0 (Windows NT 10.0; Win64; x64) AppleWebKit/537.36 (KHTML, like Gecko) Chrome/89.0.4389.90 Safari/537.36	-99
1484	0	0	31	5822659	-77	1294	-77	-77	-99	-99	d	2	9	24	2	2	1	0	0	0	0	-99	7	7	3	6	2	1	2	3	2	2	7	7	7	7	7	7	7	7	6	5	6	6	6	-99	-99	Mozilla/5.0 (Macintosh; Intel Mac OS X 10_15_7) AppleWebKit/605.1.15 (KHTML, like Gecko) Version/14.0.3 Safari/605.1.15	-99
1485	0	0	31	5822659	-77	1410	-77	-77	-99	-99	d	3	13	31	2	2	1	0	0	0	0	-99	5	5	5	5	4	4	6	6	5	5	6	5	4	5	5	4	5	5	4	4	4	4	4	-99	-99	Mozilla/5.0 (Windows NT 10.0; Win64; x64; rv:87.0) Gecko/20100101 Firefox/87.0	-99
1486	0	0	31	5812245	-77	17	-77	-77	-99	-99	d	1	-66	-66	-77	-77	-77	-77	-77	-77	-77	-66	-77	-77	-77	-77	-77	-77	-77	-77	-77	-77	-77	-77	-77	-77	-77	-77	-77	-77	-77	-77	-77	-77	-77	-66	-66	Mozilla/5.0 (Windows NT 10.0; Win64; x64; rv:87.0) Gecko/20100101 Firefox/87.0	-99
1487	0	0	31	5822659	-77	879	-77	-77	-99	-99	d	2	9	30	2	2	1	0	0	0	0	-99	6	6	5	6	4	4	4	3	2	2	6	6	5	6	3	5	5	5	4	5	4	3	3	-99	-99	Mozilla/5.0 (Macintosh; Intel Mac OS X 10_15_6) AppleWebKit/605.1.15 (KHTML, like Gecko) Version/14.0.3 Safari/605.1.15	-99
1488	0	0	32	5822659	-77	-1	-77	-77	-99	-99	d	2	2	24	2	2	1	0	0	0	0	-99	3	3	3	4	1	1	1	1	1	1	7	5	7	6	5	3	7	3	3	5	3	3	3	-99	-99	Mozilla/5.0 (Linux; Android 9; SAMSUNG SM-G955F) AppleWebKit/537.36 (KHTML, like Gecko) SamsungBrowser/13.2 Chrome/83.0.4103.106 Mobile Safari/537.36	https://wm.hrz.uni-giessen.de/horde/imp/smartmobile.php
1493	0	0	31	5822659	-77	1233	-77	-77	-99	-99	d	2	9	23	2	2	1	0	0	0	0	-99	5	5	5	4	2	2	6	5	5	3	3	4	3	5	4	3	3	3	5	4	5	4	5	-99	-99	Mozilla/5.0 (Macintosh; Intel Mac OS X 10_15_6) AppleWebKit/605.1.15 (KHTML, like Gecko) Version/14.0.3 Safari/605.1.15	-99
1494	0	0	31	5822659	-77	1113	-77	-77	-99	-99	d	2	7	24	1	2	1	0	0	0	1	-99	1	7	7	7	6	1	7	7	7	3	7	5	7	7	4	4	4	4	4	4	4	4	4	-99	-99	Mozilla/5.0 (Linux; Android 10; FP3) AppleWebKit/537.36 (KHTML, like Gecko) SamsungBrowser/13.2 Chrome/83.0.4103.106 Mobile Safari/537.36	https://wm.hrz.uni-giessen.de/horde/imp/smartmobile.php
1495	0	0	31	5822659	-77	937	-77	-77	-99	-99	d	2	3	20	1	2	1	0	0	0	0	-99	7	7	7	7	6	1	1	1	6	1	7	7	5	6	5	5	6	7	4	4	7	4	4	-99	-99	Mozilla/5.0 (Windows NT 10.0; Win64; x64; rv:87.0) Gecko/20100101 Firefox/87.0	-99
1497	0	0	31	5822659	-77	1229	-77	-77	-99	-99	d	2	5	22	2	2	1	0	0	0	0	-99	5	5	1	1	1	1	1	1	1	1	7	7	7	7	7	7	7	7	3	5	7	4	4	-99	-99	Mozilla/5.0 (Windows NT 10.0; Win64; x64; rv:87.0) Gecko/20100101 Firefox/87.0	https://webmail.stud.uni-giessen.de/
1499	0	0	31	5822659	-77	1321	-77	-77	-99	-99	d	2	2	20	2	2	1	0	0	0	0	-99	6	6	5	3	1	1	1	1	1	1	6	6	5	4	3	2	2	5	5	5	5	2	2	-99	-99	Mozilla/5.0 (Linux; Android 10; SAMSUNG SM-A715F) AppleWebKit/537.36 (KHTML, like Gecko) SamsungBrowser/13.2 Chrome/83.0.4103.106 Mobile Safari/537.36	-99
1498	0	0	31	5822659	-77	2304	-77	-77	-99	-99	d	2	1	27	1	2	1	0	0	0	0	-99	5	5	5	5	0	0	0	0	0	0	0	0	0	0	0	0	0	0	0	0	0	0	0	-99	-99	Mozilla/5.0 (Windows NT 10.0; Win64; x64) AppleWebKit/537.36 (KHTML, like Gecko) Chrome/89.0.4389.90 Safari/537.36 Edg/89.0.774.63	-99
1501	0	0	31	5812245	-77	9	-77	-77	-99	-99	d	1	-66	-66	-77	-77	-77	-77	-77	-77	-77	-66	-77	-77	-77	-77	-77	-77	-77	-77	-77	-77	-77	-77	-77	-77	-77	-77	-77	-77	-77	-77	-77	-77	-77	-66	-66	Mozilla/5.0 (Windows NT 10.0; Win64; x64; rv:87.0) Gecko/20100101 Firefox/87.0	-99
1502	0	0	31	5822659	-77	812	-77	-77	-99	-99	d	2	6	25	2	2	1	0	0	0	0	-99	7	7	7	7	3	2	3	1	1	1	7	7	7	7	7	7	7	7	7	4	4	3	3	-99	-99	Mozilla/5.0 (iPhone; CPU iPhone OS 14_3 like Mac OS X) AppleWebKit/605.1.15 (KHTML, like Gecko) Version/14.0.2 Mobile/15E148 Safari/604.1	https://wm.hrz.uni-giessen.de/horde/imp/smartmobile.php
1503	0	0	31	5822659	-77	1277	-77	-77	-99	-99	d	2	9	30	2	2	1	0	0	0	0	-99	6	6	6	5	2	2	3	2	2	1	6	6	5	5	4	5	6	6	4	6	4	4	4	-99	-99	Mozilla/5.0 (Windows NT 10.0; Win64; x64) AppleWebKit/537.36 (KHTML, like Gecko) Chrome/89.0.4389.114 Safari/537.36	-99
1504	0	0	31	5812245	-77	11	-77	-77	-99	-99	d	1	-66	-66	-77	-77	-77	-77	-77	-77	-77	-66	-77	-77	-77	-77	-77	-77	-77	-77	-77	-77	-77	-77	-77	-77	-77	-77	-77	-77	-77	-77	-77	-77	-77	-66	-66	Mozilla/5.0 (Windows NT 10.0; Win64; x64; rv:87.0) Gecko/20100101 Firefox/87.0	https://wm.hrz.uni-giessen.de/
1505	0	0	31	5822659	-77	1381	-77	-77	-99	-99	d	2	2	28	2	2	1	0	0	0	0	-99	5	5	6	6	3	5	1	1	1	1	7	7	6	6	6	6	7	7	4	4	6	4	4	-99	-99	Mozilla/5.0 (Windows NT 10.0; Win64; x64; rv:87.0) Gecko/20100101 Firefox/87.0	https://student.uniklinikum-leipzig.de/
1506	0	0	31	5822659	-77	1146	-77	-77	-99	-99	d	2	10	23	1	2	0	1	0	0	0	-99	5	5	5	5	3	2	5	2	5	2	5	4	4	4	4	4	5	4	1	5	4	3	2	-99	-99	Mozilla/5.0 (Linux; Android 9; ANE-LX1) AppleWebKit/537.36 (KHTML, like Gecko) Chrome/89.0.4389.105 Mobile Safari/537.36	-99
1508	0	0	31	5822659	-77	1114	-77	-77	-99	-99	d	2	3	24	2	2	1	1	0	0	0	-99	3	2	2	4	2	2	2	2	5	4	7	4	5	5	4	4	6	5	2	5	3	5	6	-99	-99	Mozilla/5.0 (Macintosh; Intel Mac OS X 10.15; rv:87.0) Gecko/20100101 Firefox/87.0	-99
1509	0	0	31	5822659	-77	875	-77	-77	-99	-99	d	2	4	19	2	2	0	1	0	0	0	-99	6	5	5	4	6	6	4	3	3	3	6	5	6	5	4	4	5	5	4	4	4	3	3	-99	-99	Mozilla/5.0 (Macintosh; Intel Mac OS X 10_15_6) AppleWebKit/605.1.15 (KHTML, like Gecko) Version/14.0.3 Safari/605.1.15	https://student.uniklinikum-leipzig.de/studium/allgemeines_interessantes.php
1510	0	0	31	5822659	-77	949	-77	-77	-99	-99	d	2	6	25	2	2	1	0	0	0	0	-99	7	7	6	6	2	2	2	2	3	2	7	7	7	7	7	7	7	7	2	7	4	4	4	-99	-99	Mozilla/5.0 (Linux; Android 9; VTR-L09) AppleWebKit/537.36 (KHTML, like Gecko) Chrome/89.0.4389.105 Mobile Safari/537.36	-99
1513	0	0	31	5822659	-77	1184	-77	-77	-99	-99	d	2	9	32	2	2	1	0	0	0	0	-99	4	2	4	4	4	4	6	6	4	4	6	4	4	4	4	4	4	4	4	4	4	4	4	-99	-99	Mozilla/5.0 (Windows NT 10.0; Win64; x64; rv:87.0) Gecko/20100101 Firefox/87.0	https://wm.hrz.uni-giessen.de/
1514	0	0	31	5812245	-77	18	-77	-77	-99	-99	d	1	-66	-66	-77	-77	-77	-77	-77	-77	-77	-66	-77	-77	-77	-77	-77	-77	-77	-77	-77	-77	-77	-77	-77	-77	-77	-77	-77	-77	-77	-77	-77	-77	-77	-66	-66	Mozilla/5.0 (Windows NT 10.0; Win64; x64) AppleWebKit/537.36 (KHTML, like Gecko) Chrome/89.0.4389.114 Safari/537.36	https://wm.hrz.uni-giessen.de/
1518	0	0	31	5822659	-77	1498	-77	-77	-99	-99	d	2	8	25	2	2	1	0	0	0	0	-99	5	5	3	6	1	1	3	3	1	1	7	5	7	5	4	4	7	6	4	4	4	3	3	-99	- Medizinstudierende sollten geimpft werden, bevpr Päsenzunterricht v.a. Unterricht am Krankenbett wieder stattfindet. Eine grundsätzliche Priorisierung halte ich nicht für notwendig, wenn jedoch erwartet wird täglich in Kontakt mit Patient*innen zu sein sollte mit entsprechendem Vorlauf ein Impfangebot bereitet werden. Präsenzunterricht mit potentiell infektiösen Patient*innen als verpflichtende…	Mozilla/5.0 (X11; Ubuntu; Linux x86_64; rv:87.0) Gecko/20100101 Firefox/87.0	https://deref-web.de/
1519	0	0	31	5822659	-77	857	-77	-77	-99	-99	d	2	4	28	1	2	1	0	0	0	0	-99	6	7	6	6	2	2	3	3	1	1	7	5	3	5	6	4	5	6	5	4	4	3	4	-99	-99	Mozilla/5.0 (Linux; Android 8.0.0; SM-A520F) AppleWebKit/537.36 (KHTML, like Gecko) Chrome/87.0.4280.141 Mobile Safari/537.36 OPR/62.3.3146.57763	https://wm.hrz.uni-giessen.de/horde/imp/smartmobile.php
1520	0	0	31	5822659	-77	1162	-77	-77	-99	-99	d	2	10	24	1	2	1	0	0	0	0	-99	4	3	3	5	3	3	5	5	4	4	5	3	5	3	3	3	2	5	4	1	4	1	1	Jegliche Lehre sollte in Präsenz stattfinden. Aber nur sofern es momentane Lage erlaubt, versteht sich, daher finde ich die Art der Fragestellung oben ungünstig gewählt. Zudem sollte jegliche Lehre so praxisorientiert wie möglich gestaltet werden, andernfalls kann ich mir auch einfach den Impfkalender der STIKO anschauen, das wäre effektiver als ein schlechtes Onlineseminar	-99	Mozilla/5.0 (Windows NT 10.0; Win64; x64; rv:87.0) Gecko/20100101 Firefox/87.0	https://webmail.stud.uni-giessen.de/
1522	0	0	31	5822659	-77	1443	-77	-77	-99	-99	d	5	4	30	2	2	0	0	0	0	1	Email, Studienbuero Vorklinik	1	1	1	1	2	2	2	1	1	1	7	7	7	2	1	1	1	1	1	6	4	4	4	-99	-99	Mozilla/5.0 (Linux; Android 10; SAMSUNG SM-G965F) AppleWebKit/537.36 (KHTML, like Gecko) SamsungBrowser/13.2 Chrome/83.0.4103.106 Mobile Safari/537.36	-99
1523	0	0	31	5822659	-77	789	-77	-77	-99	-99	d	2	7	23	1	2	0	1	0	0	0	-99	7	6	3	6	3	1	2	3	1	1	7	4	6	5	4	6	7	5	6	6	7	2	5	-99	-99	Mozilla/5.0 (Windows NT 10.0; Win64; x64; rv:87.0) Gecko/20100101 Firefox/87.0	https://wm.hrz.uni-giessen.de/
1524	0	0	31	5822659	-77	1194	-77	-77	-99	-99	d	2	4	23	2	2	0	0	0	0	1	Email-Verteiler Studienbüro Vorklinik	5	5	4	0	4	4	4	4	4	4	7	4	4	4	4	4	4	4	4	2	2	4	4	Bin noch nicht in der Klinik und weiß daher nicht wie Lehre zum Thema Impfen abläuft.	-99	Mozilla/5.0 (Windows NT 10.0; Win64; x64) AppleWebKit/537.36 (KHTML, like Gecko) Chrome/89.0.4389.114 Safari/537.36 Edg/89.0.774.68	-99
1525	0	0	31	5822659	-77	1695	-77	-77	-99	-99	d	2	5	25	2	2	1	0	0	0	0	-99	7	7	5	5	5	1	7	7	4	1	7	5	4	5	3	3	5	7	7	4	6	3	3	-99	-99	Mozilla/5.0 (Linux; Android 8.0.0; SM-G930F) AppleWebKit/537.36 (KHTML, like Gecko) Chrome/89.0.4389.105 Mobile Safari/537.36	https://wm.hrz.uni-giessen.de/
1528	0	0	31	5822659	-77	2456	-77	-77	-99	-99	d	2	2	27	2	2	1	0	0	0	0	-99	6	6	6	6	1	1	1	1	1	1	7	7	7	7	7	7	7	7	7	7	0	6	6	-99	-99	Mozilla/5.0 (Windows NT 10.0; Win64; x64) AppleWebKit/537.36 (KHTML, like Gecko) Chrome/89.0.4389.114 Safari/537.36 Edg/89.0.774.68	-99
1529	0	0	31	5822659	-77	1238	-77	-77	-99	-99	d	2	8	22	2	1	1	0	0	0	0	-99	7	7	6	6	2	2	3	3	2	2	7	7	7	7	7	7	7	7	7	7	7	5	5	Beispielsweise den Workshop zur Impfkommunikation der Uni Erfurt, welcher über die AG Impf dich angeboten wurde, auch an medizinischen Fakultäten im Rahmen der Lehre anbieten.	-99	Mozilla/5.0 (Linux; Android 7.0; SM-G930F) AppleWebKit/537.36 (KHTML, like Gecko) Chrome/85.0.4183.127 Mobile Safari/537.36 (Ecosia android@85.0.4183.127)	https://webmail.stud.uni-giessen.de/
1530	0	0	31	5822659	-77	1115	-77	-77	-99	-99	d	2	2	24	1	2	0	0	0	1	0	-99	7	7	6	4	6	2	1	2	2	2	7	6	5	7	6	6	6	6	6	4	6	5	5	-99	-99	Mozilla/5.0 (Linux; Android 9; ANE-LX1 Build/HUAWEIANE-L21; wv) AppleWebKit/537.36 (KHTML, like Gecko) Version/4.0 Chrome/88.0.4324.141 Mobile Safari/537.36 StudoBrowser/4.00.2-android-studo (https://studo.com/studo-browser-information-and-contact)	-99
1531	0	0	31	5822659	-77	1399	-77	-77	-99	-99	d	3	14	29	2	2	1	0	0	0	0	-99	7	7	4	5	1	1	6	5	4	2	7	7	7	7	1	1	7	7	5	4	5	5	6	-99	-99	Mozilla/5.0 (iPhone; CPU iPhone OS 14_4_2 like Mac OS X) AppleWebKit/605.1.15 (KHTML, like Gecko) Version/14.0.3 Mobile/15E148 Safari/604.1	-99
1533	0	0	31	5822659	-77	1835	-77	-77	-99	-99	d	2	9	26	2	2	1	0	0	0	0	-99	5	6	4	6	0	0	0	0	0	0	0	0	0	0	0	0	0	0	0	0	0	0	0	-99	-99	Mozilla/5.0 (iPhone; CPU iPhone OS 14_4_1 like Mac OS X) AppleWebKit/605.1.15 (KHTML, like Gecko) Version/14.0.3 Mobile/15E148 Safari/604.1	-99
1534	0	0	31	5822659	-77	1196	-77	-77	-99	-99	d	2	10	28	1	2	1	0	0	0	0	-99	6	6	4	2	1	1	5	4	3	2	6	6	4	6	3	2	6	5	5	4	4	3	2	-99	-99	Mozilla/5.0 (Windows NT 10.0; Win64; x64; rv:86.0) Gecko/20100101 Firefox/86.0	https://wm.hrz.uni-giessen.de/horde/imp/dynamic.php?page=mailbox
1536	0	0	31	5822659	-77	1150	-77	-77	-99	-99	d	2	7	28	1	2	1	0	0	0	0	-99	5	4	4	4	2	2	3	2	2	2	7	7	6	6	6	6	7	7	7	6	7	6	7	-99	-99	Mozilla/5.0 (iPhone; CPU iPhone OS 12_5_1 like Mac OS X) AppleWebKit/605.1.15 (KHTML, like Gecko) Version/12.1.2 Mobile/15E148 Safari/604.1	-99
1538	0	0	31	5822659	-77	1977	-77	-77	-99	-99	d	2	2	20	1	2	1	0	0	0	0	-99	0	0	0	0	5	5	0	0	0	0	0	0	0	0	0	0	0	0	0	0	0	0	0	-99	-99	Mozilla/5.0 (iPhone; CPU iPhone OS 14_4_1 like Mac OS X) AppleWebKit/605.1.15 (KHTML, like Gecko) Version/14.0.3 Mobile/15E148 Safari/604.1	-99
1540	0	0	31	5822659	-77	834	-77	-77	-99	-99	d	2	4	25	2	2	1	0	0	0	0	-99	5	3	3	3	1	1	3	3	1	1	7	5	5	5	5	5	6	6	6	4	5	4	4	-99	-99	Mozilla/5.0 (Macintosh; Intel Mac OS X 10_12_6) AppleWebKit/605.1.15 (KHTML, like Gecko) Version/12.1.2 Safari/605.1.15	-99
1541	0	0	31	5822659	-77	1176	-77	-77	-99	-99	d	2	3	24	2	2	0	1	0	0	0	-99	3	3	2	6	1	1	1	1	1	1	7	7	7	7	7	7	7	7	7	7	7	5	5	-99	-99	Mozilla/5.0 (iPhone; CPU iPhone OS 14_4_1 like Mac OS X) AppleWebKit/605.1.15 (KHTML, like Gecko) Version/14.0.3 Mobile/15E148 Safari/604.1	-99
1542	0	0	31	5822659	-77	1251	-77	-77	-99	-99	d	5	1	20	2	2	0	1	0	0	0	-99	5	5	5	5	4	5	2	3	3	2	6	6	5	5	6	6	6	5	3	5	5	5	5	-99	-99	Mozilla/5.0 (iPhone; CPU iPhone OS 14_4_2 like Mac OS X) AppleWebKit/605.1.15 (KHTML, like Gecko) Version/14.0.3 Mobile/15E148 Safari/604.1	-99
1543	0	0	31	5822659	-77	1149	-77	-77	-99	-99	d	2	11	32	2	2	1	0	0	0	0	-99	6	6	3	5	0	0	0	0	0	0	0	0	0	0	0	0	0	0	0	0	0	0	0	-99	-99	Mozilla/5.0 (Linux; Android 11; SM-G980F) AppleWebKit/537.36 (KHTML, like Gecko) Chrome/77.0.3865.116 Mobile Safari/537.36 EdgA/46.02.4.5152	-99
1544	0	0	31	5822659	-77	1140	-77	-77	-99	-99	d	3	13	34	1	2	1	0	0	0	0	-99	5	5	4	4	1	1	6	3	1	1	5	4	3	4	5	3	4	4	4	4	4	1	1	-99	-99	Mozilla/5.0 (iPhone; CPU iPhone OS 14_4_2 like Mac OS X) AppleWebKit/605.1.15 (KHTML, like Gecko) Version/14.0.3 Mobile/15E148 Safari/604.1	https://wm.hrz.uni-giessen.de/horde/imp/smartmobile.php
1545	0	0	31	5822659	-77	1066	-77	-77	-99	-99	d	2	7	22	2	2	0	1	0	0	0	-99	7	7	5	6	3	2	5	6	3	1	7	5	6	7	4	6	7	4	4	4	4	3	3	-99	-99	Mozilla/5.0 (Macintosh; Intel Mac OS X 10_15_6) AppleWebKit/605.1.15 (KHTML, like Gecko) Version/14.0.3 Safari/605.1.15	https://student.uniklinikum-leipzig.de/studium/allgemeines_interessantes.php
1546	0	0	31	5822659	-77	2881	-77	-77	-99	-99	d	5	3	23	1	2	1	0	0	0	0	-99	5	6	5	5	1	1	1	1	1	1	5	3	6	4	5	3	6	6	6	2	4	3	5	-99	-99	Mozilla/5.0 (Macintosh; Intel Mac OS X 10_15_6) AppleWebKit/605.1.15 (KHTML, like Gecko) Version/14.0.3 Safari/605.1.15	-99
1565	0	0	31	5822659	-77	1302	-77	-77	-99	-99	d	2	10	30	2	2	1	0	0	0	0	-99	5	5	3	3	2	2	5	6	5	5	5	5	5	4	3	3	5	4	3	5	4	3	3	-99	-99	Mozilla/5.0 (Windows NT 10.0; Win64; x64; rv:86.0) Gecko/20100101 Firefox/86.0	-99
1549	0	0	31	5822659	-77	825	-77	-77	-99	-99	d	2	2	24	2	2	1	0	0	0	0	-99	7	7	6	7	4	4	4	5	3	3	7	7	7	7	7	7	7	7	5	3	5	6	6	-99	-99	Mozilla/5.0 (iPhone; CPU iPhone OS 13_6_1 like Mac OS X) AppleWebKit/605.1.15 (KHTML, like Gecko) Version/13.1.2 Mobile/15E148 Safari/604.1	https://wm.hrz.uni-giessen.de/horde/imp/smartmobile.php
1551	0	0	31	5822659	-77	968	-77	-77	-99	-99	d	2	4	22	2	2	1	0	0	0	0	-99	5	3	4	4	4	4	5	5	5	5	6	7	6	5	6	6	6	7	4	4	5	5	5	-99	-99	Mozilla/5.0 (Macintosh; Intel Mac OS X 10_15_6) AppleWebKit/605.1.15 (KHTML, like Gecko) Version/14.0.3 Safari/605.1.15	-99
1552	0	0	31	5822659	-77	1242	-77	-77	-99	-99	d	3	11	36	1	2	1	0	0	0	0	-99	7	7	7	7	1	1	6	6	4	3	7	4	5	4	3	4	4	3	1	3	1	1	1	-99	-99	Mozilla/5.0 (iPhone; CPU iPhone OS 14_4_2 like Mac OS X) AppleWebKit/605.1.15 (KHTML, like Gecko) Version/14.0.3 Mobile/15E148 Safari/604.1	-99
1553	0	0	31	5822659	-77	1573	-77	-77	-99	-99	d	2	7	23	2	2	1	0	0	0	0	-99	6	7	6	6	3	3	3	2	2	2	7	7	7	7	7	4	7	7	4	4	6	3	3	-99	-99	Mozilla/5.0 (Macintosh; Intel Mac OS X 10_15_6) AppleWebKit/605.1.15 (KHTML, like Gecko) Version/14.0.3 Safari/605.1.15	https://wm.hrz.uni-giessen.de/horde/imp/dynamic.php?page=mailbox
1554	0	0	31	5822659	-77	439	-77	-77	-99	-99	d	2	11	24	1	2	1	0	0	0	0	-99	7	7	6	7	4	4	6	6	4	4	7	7	7	7	7	7	7	7	7	7	7	7	7	-99	-99	Mozilla/5.0 (Macintosh; Intel Mac OS X 10_14_6) AppleWebKit/605.1.15 (KHTML, like Gecko) Version/14.0.3 Safari/605.1.15	-99
1555	0	0	31	5812245	-77	15	-77	-77	-99	-99	d	1	-66	-66	-77	-77	-77	-77	-77	-77	-77	-66	-77	-77	-77	-77	-77	-77	-77	-77	-77	-77	-77	-77	-77	-77	-77	-77	-77	-77	-77	-77	-77	-77	-77	-66	-66	Mozilla/5.0 (Macintosh; Intel Mac OS X 10_15_4) AppleWebKit/605.1.15 (KHTML, like Gecko) Version/13.1 Safari/605.1.15	-99
1556	0	0	31	5822659	-77	1359	-77	-77	-99	-99	d	2	8	27	1	2	1	0	0	0	0	-99	7	7	6	6	3	3	6	6	1	1	6	6	7	6	7	7	6	6	2	6	3	2	2	-99	-99	Mozilla/5.0 (Macintosh; Intel Mac OS X 10_15_6) AppleWebKit/605.1.15 (KHTML, like Gecko) Version/14.0.3 Safari/605.1.15	https://webmail.stud.uni-giessen.de/horde/imp/dynamic.php?page=mailbox
1563	0	0	31	5822659	-77	3039	-77	-77	-99	-99	d	3	12	24	2	2	0	1	0	0	0	-99	6	7	5	6	6	4	7	7	7	7	7	6	7	7	7	5	7	7	4	4	4	6	5	-99	-99	Mozilla/5.0 (Windows NT 10.0; Win64; x64; rv:87.0) Gecko/20100101 Firefox/87.0	https://deref-web.de/
1564	0	0	31	5822659	-77	1734	-77	-77	-99	-99	d	2	4	23	1	2	1	0	0	0	0	-99	7	7	7	6	0	0	5	5	0	0	7	4	4	4	4	4	4	4	4	4	4	4	4	-99	-99	Mozilla/5.0 (Windows NT 10.0; Win64; x64; rv:87.0) Gecko/20100101 Firefox/87.0	-99
5493	0	0	31	5822659	-77	1298	-77	-77	-99	-99	d	2	10	26	2	2	1	1	0	0	0	-99	4	4	4	6	1	1	4	2	1	2	5	4	4	5	3	3	5	3	0	4	4	2	2	-99	-99	Mozilla/5.0 (Windows NT 10.0; Win64; x64) AppleWebKit/537.36 (KHTML, like Gecko) Chrome/89.0.4389.114 Safari/537.36 Edg/89.0.774.75	-99
1568	0	0	31	5812245	-77	14	-77	-77	-99	-99	d	1	-66	-66	-77	-77	-77	-77	-77	-77	-77	-66	-77	-77	-77	-77	-77	-77	-77	-77	-77	-77	-77	-77	-77	-77	-77	-77	-77	-77	-77	-77	-77	-77	-77	-66	-66	Mozilla/5.0 (Macintosh; Intel Mac OS X 10_15_6) AppleWebKit/605.1.15 (KHTML, like Gecko) Version/14.0.3 Safari/605.1.15	-99
1569	0	0	31	5822659	-77	1497	-77	-77	-99	-99	d	2	2	20	2	2	1	0	0	0	0	-99	6	6	5	5	1	1	1	1	1	1	7	7	7	6	6	6	6	6	5	7	6	5	5	-99	-99	Mozilla/5.0 (Windows NT 10.0; Win64; x64) AppleWebKit/537.36 (KHTML, like Gecko) Chrome/89.0.4389.114 Safari/537.36	-99
1570	0	0	31	5822659	-77	570	-77	-77	-99	-99	d	2	6	26	2	2	0	1	0	0	0	-99	5	5	5	5	4	4	4	4	4	4	5	5	5	0	5	5	5	5	5	5	5	5	3	-99	-99	Mozilla/5.0 (Macintosh; Intel Mac OS X 10_15_6) AppleWebKit/605.1.15 (KHTML, like Gecko) Version/14.0.3 Safari/605.1.15	-99
1571	0	0	31	5822659	-77	784	-77	-77	-99	-99	d	2	3	30	2	2	0	1	0	0	0	-99	5	5	4	4	4	4	4	5	4	2	6	6	6	4	2	4	5	4	2	5	4	4	4	-99	-99	Mozilla/5.0 (iPhone; CPU iPhone OS 14_4_1 like Mac OS X) AppleWebKit/605.1.15 (KHTML, like Gecko) Version/14.0.3 Mobile/15E148 Safari/604.1	-99
1575	0	0	31	5822659	-77	1075	-77	-77	-99	-99	d	2	1	25	1	2	0	1	0	0	0	-99	7	7	6	6	4	4	4	4	4	4	7	4	4	6	6	5	6	4	4	4	4	4	4	-99	-99	Mozilla/5.0 (Macintosh; Intel Mac OS X 10_15_6) AppleWebKit/605.1.15 (KHTML, like Gecko) Version/14.0.3 Safari/605.1.15	-99
1573	0	0	31	5822659	-77	1838	-77	-77	-99	-99	d	2	7	23	2	2	1	0	0	0	0	-99	7	7	6	6	1	1	5	3	4	2	7	7	7	6	5	5	6	6	3	5	4	2	4	-99	-99	Mozilla/5.0 (Macintosh; Intel Mac OS X 10_15_6) AppleWebKit/605.1.15 (KHTML, like Gecko) Version/14.0.3 Safari/605.1.15	-99
1572	0	0	31	5822659	-77	1240	-77	-77	-99	-99	d	2	8	23	1	2	1	1	0	0	0	-99	5	5	5	6	1	1	5	1	4	1	7	7	7	7	7	7	7	7	7	2	2	2	2	-99	-99	Mozilla/5.0 (Windows NT 10.0; Win64; x64; rv:87.0) Gecko/20100101 Firefox/87.0	https://student.uniklinikum-leipzig.de/
1574	0	0	31	5822659	-77	935	-77	-77	-99	-99	d	2	3	23	2	2	0	1	0	0	0	-99	7	7	7	6	2	2	2	2	2	2	7	7	6	6	1	1	5	6	6	3	7	6	6	-99	-99	Mozilla/5.0 (iPhone; CPU iPhone OS 14_4 like Mac OS X) AppleWebKit/605.1.15 (KHTML, like Gecko) Version/14.0.3 Mobile/15E148 Safari/604.1	-99
1576	0	0	31	5822659	-77	709	-77	-77	-99	-99	d	2	7	21	2	2	1	0	0	0	0	-99	5	6	4	3	2	2	5	2	3	3	7	4	3	3	3	3	4	5	4	4	5	2	2	-99	-99	Mozilla/5.0 (Macintosh; Intel Mac OS X 10_15_6) AppleWebKit/605.1.15 (KHTML, like Gecko) Version/14.0.3 Safari/605.1.15	-99
1577	0	0	31	5822659	-77	1169	-77	-77	-99	-99	d	2	9	32	2	2	1	0	0	0	0	-99	5	3	1	2	2	1	3	2	1	1	7	7	7	7	6	6	7	7	4	6	6	5	4	-99	-99	Mozilla/5.0 (Windows NT 10.0; Win64; x64; rv:87.0) Gecko/20100101 Firefox/87.0	https://wm.hrz.uni-giessen.de/
1579	0	0	31	5822659	-77	1416	-77	-77	-99	-99	d	2	2	25	1	2	1	1	0	0	0	-99	7	7	7	7	6	7	5	7	6	6	7	7	7	7	7	5	7	7	7	4	4	6	7	-99	-99	Mozilla/5.0 (Linux; Android 11; SM-N770F) AppleWebKit/537.36 (KHTML, like Gecko) Chrome/89.0.4389.105 Mobile Safari/537.36	-99
1580	0	0	31	5822659	-77	984	-77	-77	-99	-99	d	2	4	29	1	2	1	0	0	0	0	-99	5	7	6	6	2	2	2	2	2	1	7	5	6	7	7	5	6	7	7	4	6	5	6	-99	-99	Mozilla/5.0 (Windows NT 10.0; Win64; x64; rv:87.0) Gecko/20100101 Firefox/87.0	-99
1581	0	0	31	5822659	-77	1016	-77	-77	-99	-99	d	2	6	21	2	2	1	0	0	0	0	-99	7	7	5	4	4	5	6	6	3	3	6	6	6	6	4	5	6	6	3	5	6	4	4	-99	-99	Mozilla/5.0 (Windows NT 10.0; Win64; x64) AppleWebKit/537.36 (KHTML, like Gecko) Chrome/89.0.4389.114 Safari/537.36	-99
1582	0	0	31	5822659	-77	938	-77	-77	-99	-99	d	3	14	27	2	2	1	0	0	0	0	-99	6	6	6	5	1	1	6	7	4	3	6	4	5	5	4	4	5	5	4	4	4	4	4	-99	-99	Mozilla/5.0 (Macintosh; Intel Mac OS X 10_15_6) AppleWebKit/605.1.15 (KHTML, like Gecko) Version/14.0.1 Safari/605.1.15	http://medizinstudium.ruhr-uni-bochum.de/medidek/infoszumstudium/schwarzesbrett/Index.cfm?&msg=25680
1583	0	0	32	5822659	-77	-1	-77	-77	-99	-99	d	2	6	20	2	2	1	1	0	0	0	-99	7	7	7	5	6	6	7	7	4	2	7	5	6	5	4	4	5	6	6	4	4	2	2	-99	-99	Mozilla/5.0 (Linux; Android 8.0.0; SM-G930F) AppleWebKit/537.36 (KHTML, like Gecko) Chrome/85.0.4183.127 Mobile Safari/537.36 (Ecosia android@85.0.4183.127)	-99
1584	0	0	31	5822659	-77	1090	-77	-77	-99	-99	d	2	2	18	2	2	1	0	0	0	0	-99	7	7	5	5	1	1	1	1	1	1	7	7	7	7	7	7	7	7	2	6	6	4	4	-99	-99	Mozilla/5.0 (Macintosh; Intel Mac OS X 10_15_6) AppleWebKit/605.1.15 (KHTML, like Gecko) Version/14.0 Safari/605.1.15	-99
1585	0	0	31	5822659	-77	1034	-77	-77	-99	-99	d	2	7	23	2	2	1	0	0	0	0	-99	6	6	4	4	5	4	5	5	3	2	6	5	5	5	3	3	5	4	4	4	4	4	4	-99	-99	Mozilla/5.0 (Linux; Android 11; Pixel 3a) AppleWebKit/537.36 (KHTML, like Gecko) Chrome/89.0.4389.105 Mobile Safari/537.36	-99
1586	0	0	31	5822659	-77	1323	-77	-77	-99	-99	d	2	10	31	1	2	1	0	0	0	0	-99	7	7	5	5	1	1	7	7	4	1	7	7	7	7	5	4	7	7	7	7	7	4	4	-99	-99	Mozilla/5.0 (Linux; Android 7.0; NEM-L51) AppleWebKit/537.36 (KHTML, like Gecko) Chrome/83.0.4103.106 Mobile Safari/537.36	http://medizinstudium.ruhr-uni-bochum.de/medidek/infoszumstudium/schwarzesbrett/Index.cfm?&msg=25680
1587	0	0	31	5822659	-77	3918	-77	-77	-99	-99	d	2	5	22	2	2	1	0	0	0	0	-99	5	6	4	4	4	4	6	6	4	4	7	6	6	7	7	6	6	6	4	4	7	3	3	-99	-99	Mozilla/5.0 (iPhone; CPU iPhone OS 14_4_2 like Mac OS X) AppleWebKit/605.1.15 (KHTML, like Gecko) Version/14.0.3 Mobile/15E148 Safari/604.1	http://medizinstudium.ruhr-uni-bochum.de/medidek/infoszumstudium/schwarzesbrett/Index.cfm?&msg=25680
1590	0	0	32	5822659	-77	-1	-77	-77	-99	-99	d	2	6	20	2	2	1	0	0	0	0	-99	7	7	7	6	6	6	6	6	5	5	7	3	7	7	7	7	5	7	6	6	6	3	3	-99	-99	Mozilla/5.0 (Macintosh; Intel Mac OS X 10_12_6) AppleWebKit/605.1.15 (KHTML, like Gecko) Version/12.1.2 Safari/605.1.15	-99
1592	0	0	31	5822659	-77	1732	-77	-77	-99	-99	d	2	1	19	2	2	1	0	0	0	0	-99	5	6	5	5	0	0	0	0	0	0	0	0	0	0	0	0	0	0	0	0	0	0	0	-99	-99	Mozilla/5.0 (iPhone; CPU iPhone OS 14_4_2 like Mac OS X) AppleWebKit/605.1.15 (KHTML, like Gecko) Version/14.0.3 Mobile/15E148 Safari/604.1	http://medizinstudium.ruhr-uni-bochum.de/medidek/infoszumstudium/schwarzesbrett/Index.cfm?&msg=25680
1591	0	0	31	5822659	-77	758	-77	-77	-99	-99	d	2	4	20	2	2	1	0	0	0	0	-99	3	3	1	1	2	1	1	1	1	1	6	6	6	6	6	6	6	6	6	2	5	2	2	-99	-99	Mozilla/5.0 (Windows NT 10.0; Win64; x64) AppleWebKit/537.36 (KHTML, like Gecko) Chrome/89.0.4389.114 Safari/537.36	http://medizinstudium.ruhr-uni-bochum.de/
1593	0	0	31	5822659	-77	796	-77	-77	-99	-99	d	2	1	19	2	2	1	0	0	0	0	-99	6	6	3	3	3	2	2	2	2	2	5	5	5	5	5	5	5	5	5	5	5	5	5	-99	-99	Mozilla/5.0 (Macintosh; Intel Mac OS X 10_15_6) AppleWebKit/605.1.15 (KHTML, like Gecko) Version/14.0.3 Safari/605.1.15	http://medizinstudium.ruhr-uni-bochum.de/medidek/infoszumstudium/schwarzesbrett/Index.cfm?&msg=25680
1594	0	0	31	5822659	-77	1348	-77	-77	-99	-99	d	2	6	21	1	2	1	0	0	0	0	-99	7	7	7	7	1	3	5	1	1	1	7	5	7	7	7	7	7	7	7	3	7	1	1	-99	-99	Mozilla/5.0 (iPhone; CPU iPhone OS 14_4 like Mac OS X) AppleWebKit/605.1.15 (KHTML, like Gecko) Version/14.0.3 Mobile/15E148 Safari/604.1	-99
1595	0	0	31	5822659	-77	626	-77	-77	-99	-99	d	2	2	26	1	2	0	1	0	0	0	-99	4	4	4	4	4	4	4	4	4	4	7	3	6	7	4	4	7	4	4	4	4	2	2	-99	-99	Mozilla/5.0 (Windows NT 10.0; Win64; x64) AppleWebKit/537.36 (KHTML, like Gecko) Chrome/89.0.4389.90 Safari/537.36	https://wm.hrz.uni-giessen.de/
1596	0	0	31	5822659	-77	610	-77	-77	-99	-99	d	2	4	29	1	2	1	0	0	0	0	-99	6	6	6	6	1	1	1	1	1	1	4	4	4	4	1	1	5	3	5	1	1	1	1	-99	-99	Mozilla/5.0 (Macintosh; Intel Mac OS X 10_15_6) AppleWebKit/605.1.15 (KHTML, like Gecko) Version/14.0.3 Safari/605.1.15	http://medizinstudium.ruhr-uni-bochum.de/medidek/infoszumstudium/schwarzesbrett/Index.cfm?&msg=25680
1597	0	0	31	5822659	-77	955	-77	-77	-99	-99	d	2	6	31	1	1	1	0	0	0	0	-99	6	6	6	6	6	6	7	6	0	4	7	7	7	7	5	7	7	6	5	6	4	4	4	-99	-99	Mozilla/5.0 (Linux; Android 8.0.0; SAMSUNG SM-G960F) AppleWebKit/537.36 (KHTML, like Gecko) SamsungBrowser/13.2 Chrome/83.0.4103.106 Mobile Safari/537.36	http://medizinstudium.ruhr-uni-bochum.de/medidek/infoszumstudium/schwarzesbrett/Index.cfm?&msg=25680
1599	0	0	31	5822659	-77	1007	-77	-77	-99	-99	d	2	5	22	2	2	1	0	0	0	0	-99	6	6	5	3	5	1	6	2	3	2	7	7	6	6	3	3	7	3	6	2	3	1	1	-99	-99	Mozilla/5.0 (Linux; Android 10; EML-L29 Build/HUAWEIEML-L29; wv) AppleWebKit/537.36 (KHTML, like Gecko) Version/4.0 Chrome/89.0.4389.105 Mobile Safari/537.36 EdgW/1.0	http://medizinstudium.ruhr-uni-bochum.de/
1605	0	0	31	5822659	-77	1486	-77	-77	-99	-99	d	3	12	24	2	2	1	0	0	0	0	-99	7	7	5	5	4	4	4	2	2	1	6	6	6	6	4	4	5	5	4	4	4	2	2	-99	-99	Mozilla/5.0 (Windows NT 10.0; Win64; x64) AppleWebKit/537.36 (KHTML, like Gecko) Chrome/89.0.4389.90 Safari/537.36 Edg/89.0.774.54	-99
1601	0	0	31	5822659	-77	990	-77	-77	-99	-99	d	2	6	32	2	2	1	0	0	0	0	-99	4	6	6	6	1	1	1	1	1	1	7	7	7	4	6	6	6	6	7	4	4	3	3	-99	-99	Mozilla/5.0 (Macintosh; Intel Mac OS X 10_15_6) AppleWebKit/605.1.15 (KHTML, like Gecko) Version/14.0.3 Safari/605.1.15	https://student.uniklinikum-leipzig.de/studium/allgemeines_interessantes.php
1602	0	0	31	5822659	-77	983	-77	-77	-99	-99	d	2	8	23	2	2	1	0	0	0	0	-99	6	6	6	6	7	5	7	6	5	3	7	5	7	5	2	2	5	2	5	5	5	2	5	-99	-99	Mozilla/5.0 (Windows NT 10.0; Win64; x64) AppleWebKit/537.36 (KHTML, like Gecko) Chrome/58.0.3029.110 Safari/537.36 Edge/16.16299	http://medizinstudium.ruhr-uni-bochum.de/medidek/infoszumstudium/schwarzesbrett/Index.cfm?&msg=25680
1604	0	0	31	5822659	-77	2358	-77	-77	-99	-99	d	2	10	25	1	2	1	0	0	0	0	-99	5	5	5	6	2	1	5	7	2	2	7	2	5	4	1	2	6	3	4	4	4	2	2	-99	-99	Mozilla/5.0 (Linux; Android 10; LM-V405) AppleWebKit/537.36 (KHTML, like Gecko) Chrome/79.0.3945.93 Mobile Safari/537.36	http://medizinstudium.ruhr-uni-bochum.de/medidek/infoszumstudium/schwarzesbrett/Index.cfm?&msg=25680
1607	0	0	31	5822659	-77	677	-77	-77	-99	-99	d	2	10	22	2	2	1	0	0	0	0	-99	6	6	5	5	3	2	2	2	2	2	5	5	6	5	6	6	6	5	6	3	4	4	4	-99	-99	Mozilla/5.0 (Macintosh; Intel Mac OS X 10_15_2) AppleWebKit/605.1.15 (KHTML, like Gecko) Version/13.0.4 Safari/605.1.15	-99
1606	0	0	31	5822659	-77	1467	-77	-77	-99	-99	d	2	6	23	1	2	1	0	0	0	0	-99	5	6	6	6	2	2	2	1	2	1	7	7	7	5	6	4	6	4	4	4	4	6	3	-99	-99	Mozilla/5.0 (iPhone; CPU iPhone OS 14_4 like Mac OS X) AppleWebKit/605.1.15 (KHTML, like Gecko) Version/14.0.3 Mobile/15E148 Safari/604.1	-99
1609	0	0	31	5822659	-77	1436	-77	-77	-99	-99	d	2	5	20	2	2	1	0	0	0	0	-99	6	5	2	1	1	1	6	6	1	2	7	5	6	6	4	3	6	5	4	4	4	1	1	-99	-99	Mozilla/5.0 (Windows NT 10.0; Win64; x64; rv:87.0) Gecko/20100101 Firefox/87.0	http://medizinstudium.ruhr-uni-bochum.de/
1610	0	0	31	5822659	-77	1371	-77	-77	-99	-99	d	2	4	21	2	2	1	0	0	0	0	-99	6	6	5	6	3	2	5	2	2	2	5	5	6	5	6	5	6	6	5	5	6	4	4	-99	-99	Mozilla/5.0 (Windows NT 10.0; Win64; x64) AppleWebKit/537.36 (KHTML, like Gecko) Chrome/89.0.4389.114 Safari/537.36	-99
1608	0	0	31	5822659	-77	855	-77	-77	-99	-99	d	2	10	24	2	2	1	0	0	0	0	-99	5	6	6	6	2	2	6	5	4	4	6	6	5	5	4	5	5	4	4	4	4	3	3	-99	-99	Mozilla/5.0 (Windows NT 10.0; Win64; x64; rv:87.0) Gecko/20100101 Firefox/87.0	-99
1611	0	0	31	5822659	-77	947	-77	-77	-99	-99	d	2	2	19	2	2	1	0	0	0	0	-99	6	7	7	5	6	3	3	3	3	2	7	7	6	7	4	6	7	5	3	5	4	2	2	-99	-99	Mozilla/5.0 (iPhone; CPU iPhone OS 14_4_2 like Mac OS X) AppleWebKit/605.1.15 (KHTML, like Gecko) Version/14.0.3 Mobile/15E148 Safari/604.1	http://medizinstudium.ruhr-uni-bochum.de/medidek/infoszumstudium/schwarzesbrett/Index.cfm?&msg=25680
1613	0	0	31	5812245	-77	19	-77	-77	-99	-99	d	1	-66	-66	-77	-77	-77	-77	-77	-77	-77	-66	-77	-77	-77	-77	-77	-77	-77	-77	-77	-77	-77	-77	-77	-77	-77	-77	-77	-77	-77	-77	-77	-77	-77	-66	-66	Mozilla/5.0 (Windows NT 10.0; Win64; x64; rv:87.0) Gecko/20100101 Firefox/87.0	-99
1612	0	0	31	5822659	-77	1021	-77	-77	-99	-99	d	2	4	22	2	2	1	0	0	0	0	-99	7	7	6	5	1	1	3	1	1	1	6	6	7	7	6	4	7	6	4	4	4	1	4	-99	-99	Mozilla/5.0 (Windows NT 10.0; Win64; x64) AppleWebKit/537.36 (KHTML, like Gecko) Chrome/89.0.4389.114 Safari/537.36	-99
1618	0	0	31	5822659	-77	1192	-77	-77	-99	-99	d	2	8	21	2	2	1	0	0	0	0	-99	7	7	6	6	5	2	7	6	2	2	7	7	7	7	6	5	7	5	6	3	6	6	6	-99	-99	Mozilla/5.0 (Linux; Android 8.0.0; WAS-LX1A) AppleWebKit/537.36 (KHTML, like Gecko) Chrome/88.0.4324.181 Mobile Safari/537.36 (Ecosia android@88.0.4324.181)	http://medizinstudium.ruhr-uni-bochum.de/
1614	0	0	31	5822659	-77	905	-77	-77	-99	-99	d	2	10	23	2	2	1	0	0	0	0	-99	6	5	5	4	1	1	7	7	7	2	7	4	7	7	7	7	7	2	4	4	4	4	5	-99	-99	Mozilla/5.0 (iPhone; CPU iPhone OS 14_4 like Mac OS X) AppleWebKit/605.1.15 (KHTML, like Gecko) Version/14.0.3 Mobile/15E148 Safari/604.1	-99
1615	0	0	31	5822659	-77	1131	-77	-77	-99	-99	d	2	2	25	2	2	1	0	0	0	0	-99	5	5	3	3	1	1	4	5	1	1	5	7	7	5	4	4	4	3	3	3	3	3	2	-99	-99	Mozilla/5.0 (iPhone; CPU iPhone OS 14_4_2 like Mac OS X) AppleWebKit/605.1.15 (KHTML, like Gecko) Version/14.0.3 Mobile/15E148 Safari/604.1	http://medizinstudium.ruhr-uni-bochum.de/medidek/infoszumstudium/schwarzesbrett/Index.cfm?&msg=25680
1616	0	0	31	5822659	-77	510	-77	-77	-99	-99	d	2	10	24	2	2	1	0	0	0	0	-99	7	7	7	7	1	1	7	4	4	2	7	7	7	5	7	7	7	7	1	7	7	1	1	-99	-99	Mozilla/5.0 (iPhone; CPU iPhone OS 14_4_1 like Mac OS X) AppleWebKit/605.1.15 (KHTML, like Gecko) Version/14.0.3 Mobile/15E148 Safari/604.1	http://medizinstudium.ruhr-uni-bochum.de/medidek/infoszumstudium/schwarzesbrett/Index.cfm?&msg=25680
1620	0	0	31	5822659	-77	605	-77	-77	-99	-99	d	2	1	22	2	2	1	0	0	0	0	-99	6	1	1	1	1	1	1	1	1	1	6	6	7	6	7	6	6	6	6	6	6	4	4	-99	-99	Mozilla/5.0 (Windows NT 10.0; Win64; x64; rv:87.0) Gecko/20100101 Firefox/87.0	http://medizinstudium.ruhr-uni-bochum.de/
1621	0	0	31	5822659	-77	849	-77	-77	-99	-99	d	2	5	22	2	2	1	0	0	0	0	-99	7	7	7	7	7	5	7	7	5	5	6	5	4	3	4	3	6	5	5	3	5	2	2	-99	-99	Mozilla/5.0 (Linux; Android 11; SAMSUNG SM-G973F) AppleWebKit/537.36 (KHTML, like Gecko) SamsungBrowser/13.2 Chrome/83.0.4103.106 Mobile Safari/537.36	-99
1745	0	0	31	5822659	-77	1308	-77	-77	-99	-99	d	3	12	32	2	2	1	0	0	0	0	-99	1	4	5	5	1	1	6	5	4	3	7	5	4	5	1	3	5	4	3	3	3	3	3	-99	-99	Mozilla/5.0 (Macintosh; Intel Mac OS X 10_15_6) AppleWebKit/605.1.15 (KHTML, like Gecko) Version/14.0.3 Safari/605.1.15	http://medizinstudium.ruhr-uni-bochum.de/medidek/infoszumstudium/schwarzesbrett/Index.cfm?&msg=25680
1622	0	0	32	5822659	-77	-1	-77	-77	-99	-99	d	2	10	22	2	2	1	0	0	0	0	-99	4	4	2	2	1	1	7	7	5	1	7	7	7	5	3	6	6	5	4	4	4	2	2	-99	-99	Mozilla/5.0 (Linux; Android 9; ANE-LX1) AppleWebKit/537.36 (KHTML, like Gecko) Chrome/88.0.4324.181 Mobile Safari/537.36 (Ecosia android@88.0.4324.181)	-99
1623	0	0	31	5822659	-77	864	-77	-77	-99	-99	d	2	2	21	2	2	1	0	0	0	0	-99	5	4	1	1	1	1	1	1	1	1	7	5	5	6	3	1	3	7	7	7	7	4	4	-99	-99	Mozilla/5.0 (Windows NT 10.0; Win64; x64) AppleWebKit/537.36 (KHTML, like Gecko) Chrome/89.0.4389.114 Safari/537.36	-99
1624	0	0	31	5822659	-77	858	-77	-77	-99	-99	d	2	6	20	2	2	1	0	0	0	0	-99	7	7	4	3	7	7	7	7	5	5	7	6	7	7	5	5	7	7	7	1	1	4	4	-99	-99	Mozilla/5.0 (Macintosh; Intel Mac OS X 11_1_0) AppleWebKit/537.36 (KHTML, like Gecko) Chrome/89.0.4389.90 Safari/537.36	-99
1625	0	0	31	5822659	-77	1518	-77	-77	-99	-99	d	2	2	19	2	2	1	0	0	0	0	-99	5	5	4	5	5	3	3	2	2	1	5	4	4	4	5	4	6	6	4	4	3	3	3	-99	-99	Mozilla/5.0 (Linux; Android 10; MAR-LX1A) AppleWebKit/537.36 (KHTML, like Gecko) Chrome/89.0.4389.105 Mobile Safari/537.36	-99
1626	0	0	31	5822659	-77	794	-77	-77	-99	-99	d	3	12	23	2	2	1	0	0	0	0	-99	4	4	3	3	3	3	6	4	4	5	7	7	7	7	6	6	7	7	4	4	5	4	5	-99	-99	Mozilla/5.0 (Linux; Android 10; Mi A2 Lite) AppleWebKit/537.36 (KHTML, like Gecko) Chrome/77.0.3865.116 Mobile Safari/537.36 EdgA/46.02.4.5152	http://medizinstudium.ruhr-uni-bochum.de/medidek/infoszumstudium/schwarzesbrett/Index.cfm?&msg=25680
1628	0	0	31	5822659	-77	1132	-77	-77	-99	-99	d	2	4	25	3	2	1	0	0	0	0	-99	3	6	5	3	1	1	1	1	1	1	6	6	7	2	1	1	1	5	1	4	1	1	6	-99	-99	Mozilla/5.0 (Windows NT 10.0; Win64; x64; rv:87.0) Gecko/20100101 Firefox/87.0	-99
1629	0	0	31	5822659	-77	1024	-77	-77	-99	-99	d	2	2	22	2	2	1	0	0	0	0	-99	6	1	2	3	1	1	1	1	1	1	7	7	7	7	1	7	7	7	7	7	7	7	7	-99	-99	Mozilla/5.0 (Linux; Android 9; SM-G950F) AppleWebKit/537.36 (KHTML, like Gecko) Chrome/89.0.4389.105 Mobile Safari/537.36	-99
1630	0	0	31	5822659	-77	1023	-77	-77	-99	-99	d	2	2	20	1	2	1	0	0	0	0	-99	5	6	5	6	2	5	1	1	1	1	7	4	7	7	7	7	7	7	4	7	7	1	1	-99	-99	Mozilla/5.0 (Linux; Android 11; SM-A515F) AppleWebKit/537.36 (KHTML, like Gecko) Chrome/89.0.4389.105 Mobile Safari/537.36	http://medizinstudium.ruhr-uni-bochum.de/
1631	0	0	31	5822659	-77	1223	-77	-77	-99	-99	d	2	6	22	1	2	1	0	0	0	0	-99	5	6	6	3	2	2	3	5	4	2	7	3	4	4	2	3	5	3	5	3	6	5	3	-99	-99	Mozilla/5.0 (iPhone; CPU iPhone OS 14_4_2 like Mac OS X) AppleWebKit/605.1.15 (KHTML, like Gecko) Version/14.0.3 Mobile/15E148 Safari/604.1	-99
1632	0	0	31	5822659	-77	748	-77	-77	-99	-99	d	2	4	20	2	2	1	0	0	0	0	-99	3	1	2	3	3	3	3	3	3	3	6	6	6	6	3	3	5	6	7	1	4	1	1	-99	-99	Mozilla/5.0 (Windows NT 10.0; Win64; x64; rv:87.0) Gecko/20100101 Firefox/87.0	-99
1633	0	0	31	5822659	-77	790	-77	-77	-99	-99	d	2	2	26	2	2	1	0	0	0	0	-99	5	4	1	1	1	1	1	1	1	1	7	4	7	4	1	1	4	4	4	4	4	4	4	-99	-99	Mozilla/5.0 (Macintosh; Intel Mac OS X 10_15_6) AppleWebKit/605.1.15 (KHTML, like Gecko) Version/14.0.3 Safari/605.1.15	-99
1695	0	0	31	5822659	-77	1524	-77	-77	-99	-99	d	2	10	22	1	2	1	0	0	0	0	-99	6	7	6	6	3	3	6	6	6	6	7	5	5	5	4	5	5	4	4	4	6	4	4	Momentan halte ich es für wichtiger, den Unterricht überhaupt so gut es geht fortzusetzen. Bezüglich der Covid-Impfung bekommt muss man sich ohnehin selbst auf dem Laufenden halten, da sich alle paar Tage wieder etwas ändert. Ganz allgemein ist die Lehre zum Thema Impfung an meiner Universität seht gut.	Ich brauche meinen Komiliton*innen Vaxzevria nicht zu empfehlen, da dieser Impfstoff nicht mehr für unter 60 Jährige verwendet wird. Dementsprechend habe ich auch die Umfrage ausgefüllt. Ich bevorzuge für mich persönlich einen mRNA-Impfstoff, da aufgrund von Vorerkrankungen die zugelassenen Vektor-Impfstoffe bei mir möglicherweise nicht wirksam genug sind.	Mozilla/5.0 (Windows NT 10.0; Win64; x64; rv:87.0) Gecko/20100101 Firefox/87.0	http://medizinstudium.ruhr-uni-bochum.de/
1636	0	0	32	5822659	-77	-1	-77	-77	-99	-99	d	2	6	21	2	2	1	0	0	0	0	-99	7	7	7	7	6	4	7	6	3	4	7	6	6	7	5	3	4	2	4	4	5	3	2	-99	-99	Mozilla/5.0 (iPhone; CPU iPhone OS 14_4_1 like Mac OS X) AppleWebKit/605.1.15 (KHTML, like Gecko) Version/14.0.3 Mobile/15E148 Safari/604.1	-99
1637	0	0	31	5822659	-77	2473	-77	-77	-99	-99	d	2	6	29	1	2	1	0	0	0	0	-99	7	7	5	5	5	5	7	6	4	2	7	7	6	5	1	4	3	4	1	6	7	4	4	-99	-99	Mozilla/5.0 (iPhone; CPU iPhone OS 14_4_2 like Mac OS X) AppleWebKit/605.1.15 (KHTML, like Gecko) Version/14.0.3 Mobile/15E148 Safari/604.1	http://medizinstudium.ruhr-uni-bochum.de/medidek/infoszumstudium/schwarzesbrett/Index.cfm?&msg=25680
1639	0	0	31	5822659	-77	991	-77	-77	-99	-99	d	2	8	23	2	2	1	0	0	0	0	-99	5	5	5	4	6	6	6	6	3	3	6	4	5	5	5	4	4	5	5	3	4	3	3	-99	-99	Mozilla/5.0 (Macintosh; Intel Mac OS X 10_15_6) AppleWebKit/605.1.15 (KHTML, like Gecko) Version/14.0.3 Safari/605.1.15	http://medizinstudium.ruhr-uni-bochum.de/medidek/infoszumstudium/schwarzesbrett/Index.cfm?&msg=25680
1640	0	0	31	5822659	-77	1067	-77	-77	-99	-99	d	2	2	20	2	2	1	0	0	0	0	-99	4	4	2	3	2	1	1	1	1	1	7	4	4	4	4	4	4	7	4	4	7	4	4	-99	-99	Mozilla/5.0 (iPhone; CPU iPhone OS 14_4_1 like Mac OS X) AppleWebKit/605.1.15 (KHTML, like Gecko) Version/14.0.3 Mobile/15E148 Safari/604.1	http://medizinstudium.ruhr-uni-bochum.de/medidek/infoszumstudium/schwarzesbrett/Index.cfm?&msg=25680
1641	0	0	31	5822659	-77	1191	-77	-77	-99	-99	d	2	4	21	1	2	1	0	0	0	0	-99	5	5	5	5	4	4	4	4	4	4	7	4	6	5	6	5	6	6	4	4	4	4	4	-99	-99	Mozilla/5.0 (Linux; Android 11; SM-G780F) AppleWebKit/537.36 (KHTML, like Gecko) Chrome/88.0.4324.181 Mobile Safari/537.36 (Ecosia android@88.0.4324.181)	https://webmail.stud.uni-giessen.de/
1642	0	0	31	5822659	-77	592	-77	-77	-99	-99	d	3	12	23	1	2	1	0	0	0	0	-99	5	4	5	5	1	1	5	5	6	5	7	7	4	5	2	4	5	6	4	4	4	0	0	-99	-99	Mozilla/5.0 (Android 10; Mobile; rv:87.0) Gecko/87.0 Firefox/87.0	-99
1643	0	0	31	5822659	-77	1210	-77	-77	-99	-99	d	2	2	30	2	2	1	0	0	0	0	-99	4	4	6	5	1	1	1	1	1	1	7	7	7	7	7	5	7	7	7	1	1	7	7	-99	-99	Mozilla/5.0 (iPhone; CPU iPhone OS 14_4_2 like Mac OS X) AppleWebKit/605.1.15 (KHTML, like Gecko) Version/14.0.3 Mobile/15E148 Safari/604.1	http://medizinstudium.ruhr-uni-bochum.de/medidek/infoszumstudium/schwarzesbrett/Index.cfm?&msg=25680
1644	0	0	31	5822659	-77	683	-77	-77	-99	-99	d	3	12	27	2	2	1	0	0	0	0	-99	7	7	5	5	2	2	6	6	6	5	7	7	7	7	6	6	6	6	7	5	7	6	6	-99	-99	Mozilla/5.0 (iPhone; CPU iPhone OS 14_4_2 like Mac OS X) AppleWebKit/605.1.15 (KHTML, like Gecko) Version/14.0.3 Mobile/15E148 Safari/604.1	-99
1645	0	0	31	5822659	-77	895	-77	-77	-99	-99	d	3	12	23	2	1	1	0	0	0	0	-99	6	7	7	7	1	1	7	7	4	5	7	4	4	4	4	3	4	3	3	4	4	3	3	-99	-99	Mozilla/5.0 (iPhone; CPU iPhone OS 14_4 like Mac OS X) AppleWebKit/605.1.15 (KHTML, like Gecko) CriOS/87.0.4280.77 Mobile/15E148 Safari/604.1	-99
1647	0	0	31	5822659	-77	1207	-77	-77	-99	-99	d	2	9	33	2	2	1	0	0	0	0	-99	7	7	5	5	1	1	5	5	5	4	7	6	5	5	1	1	4	4	4	4	4	3	3	-99	-99	Mozilla/5.0 (iPhone; CPU iPhone OS 14_4_2 like Mac OS X) AppleWebKit/605.1.15 (KHTML, like Gecko) Version/14.0.3 Mobile/15E148 Safari/604.1	http://medizinstudium.ruhr-uni-bochum.de/medidek/infoszumstudium/schwarzesbrett/Index.cfm?&msg=25680
1648	0	0	31	5822659	-77	1130	-77	-77	-99	-99	d	2	4	20	2	2	0	1	0	0	0	-99	5	6	6	6	1	1	2	1	5	1	6	7	6	7	5	2	7	5	1	6	5	1	1	-99	-99	Mozilla/5.0 (Linux; Android 11; SM-T865) AppleWebKit/537.36 (KHTML, like Gecko) Chrome/89.0.4389.105 Safari/537.36	http://medizinstudium.ruhr-uni-bochum.de/
1649	0	0	31	5822659	-77	840	-77	-77	-99	-99	d	2	2	19	2	2	1	0	0	0	0	-99	5	6	6	6	0	0	0	0	0	0	0	0	0	0	0	0	0	0	0	0	0	0	0	-99	-99	Mozilla/5.0 (Linux; U; Android 10; de-de; Redmi Note 8 Pro Build/QP1A.190711.020) AppleWebKit/537.36 (KHTML, like Gecko) Version/4.0 Chrome/79.0.3945.147 Mobile Safari/537.36 XiaoMi/MiuiBrowser/12.9.3-gn	http://medizinstudium.ruhr-uni-bochum.de/medidek/infoszumstudium/schwarzesbrett/Index.cfm?&msg=25680
1650	0	0	31	5822659	-77	5550	-77	-77	-99	-99	d	2	9	26	2	2	0	1	0	0	0	-99	7	7	6	5	3	2	6	5	3	2	7	7	7	7	7	7	7	7	7	4	5	5	4	-99	-99	Mozilla/5.0 (Linux; U; Android 10; de-de; POCO X3 NFC Build/QKQ1.200512.002) AppleWebKit/537.36 (KHTML, like Gecko) Version/4.0 Chrome/79.0.3945.147 Mobile Safari/537.36 XiaoMi/MiuiBrowser/12.9.3-gn	http://medizinstudium.ruhr-uni-bochum.de/medidek/infoszumstudium/schwarzesbrett/Index.cfm?&msg=25680
1651	0	0	31	5822659	-77	726	-77	-77	-99	-99	d	2	2	19	1	2	1	0	0	0	0	-99	3	6	4	5	2	2	2	3	2	3	7	7	5	4	2	2	5	7	5	1	1	1	1	-99	-99	Mozilla/5.0 (iPhone; CPU iPhone OS 14_4_2 like Mac OS X) AppleWebKit/605.1.15 (KHTML, like Gecko) Version/14.0.3 Mobile/15E148 Safari/604.1	-99
1652	0	0	31	5822659	-77	2354	-77	-77	-99	-99	d	2	6	31	1	2	1	0	0	0	0	-99	6	6	5	3	5	2	6	6	4	5	6	5	5	6	4	3	5	3	3	4	6	4	5	-99	-99	Mozilla/5.0 (iPhone; CPU iPhone OS 14_4_2 like Mac OS X) AppleWebKit/605.1.15 (KHTML, like Gecko) Version/14.0.3 Mobile/15E148 Safari/604.1	-99
1653	0	0	31	5822659	-77	1434	-77	-77	-99	-99	d	2	6	28	1	2	1	0	0	0	0	-99	5	5	7	7	6	6	4	2	2	1	7	7	7	7	6	7	7	7	5	5	7	1	1	Bitte keine zusätzlichen Klausuren, aber ein Kurs wäre super um mit Impfskeptikern umgehen zu können.	Medizinstudierende können gemeinsam bei den Hausärzten mithelfen und sammeln so Praxiserfahrung	Mozilla/5.0 (iPhone; CPU iPhone OS 14_4_2 like Mac OS X) AppleWebKit/605.1.15 (KHTML, like Gecko) Version/14.0.3 Mobile/15E148 Safari/604.1	-99
1654	0	0	31	5822659	-77	895	-77	-77	-99	-99	d	2	6	22	2	2	0	1	0	0	0	-99	5	7	7	7	6	3	7	7	1	1	6	6	7	7	7	7	7	7	7	7	7	7	7	-99	-99	Mozilla/5.0 (Windows NT 10.0; Win64; x64) AppleWebKit/537.36 (KHTML, like Gecko) Chrome/89.0.4389.114 Safari/537.36	http://medizinstudium.ruhr-uni-bochum.de/
1655	0	0	31	5822659	-77	717	-77	-77	-99	-99	d	2	2	19	2	2	1	0	0	0	0	-99	2	2	1	1	4	4	4	4	4	4	6	5	4	4	4	4	4	4	4	4	3	3	3	-99	-99	Mozilla/5.0 (Windows NT 10.0; Win64; x64; rv:87.0) Gecko/20100101 Firefox/87.0	-99
1656	0	0	31	5822659	-77	698	-77	-77	-99	-99	d	2	2	20	2	2	1	0	0	0	0	-99	5	5	3	3	1	1	1	1	1	1	7	7	7	7	7	7	7	7	7	4	6	3	3	-99	-99	Mozilla/5.0 (Macintosh; Intel Mac OS X 10_15_6) AppleWebKit/605.1.15 (KHTML, like Gecko) Version/14.0.3 Safari/605.1.15	http://medizinstudium.ruhr-uni-bochum.de/medidek/infoszumstudium/schwarzesbrett/Index.cfm?&msg=25680
1684	0	0	31	5822659	-77	1275	-77	-77	-99	-99	d	2	7	22	2	2	1	0	0	0	0	-99	6	7	6	5	5	4	6	5	2	1	6	5	7	7	6	6	7	5	4	4	4	5	5	-99	-99	Mozilla/5.0 (Windows NT 10.0; Win64; x64; rv:87.0) Gecko/20100101 Firefox/87.0	http://medizinstudium.ruhr-uni-bochum.de/
1657	0	0	31	5822659	-77	915	-77	-77	-99	-99	d	2	11	24	2	2	1	0	0	0	0	-99	4	2	3	2	0	0	0	0	0	0	0	0	0	0	0	0	0	0	0	0	0	0	0	-99	-99	Mozilla/5.0 (Linux; Android 8.0.0; F5321) AppleWebKit/537.36 (KHTML, like Gecko) Chrome/88.0.4324.181 Mobile Safari/537.36	-99
1658	0	0	31	5822659	-77	791	-77	-77	-99	-99	d	2	2	25	1	2	0	1	0	0	0	-99	1	5	5	5	2	2	2	1	1	1	4	7	4	1	1	1	1	1	1	1	1	1	1	-99	-99	Mozilla/5.0 (Windows NT 10.0; Win64; x64) AppleWebKit/537.36 (KHTML, like Gecko) Chrome/89.0.4389.114 Safari/537.36	-99
1662	0	0	31	5822659	-77	1168	-77	-77	-99	-99	d	3	15	27	1	2	1	0	0	0	0	-99	5	5	5	5	4	2	6	5	3	2	7	5	5	5	4	4	5	5	6	4	7	5	5	-99	-99	Mozilla/5.0 (Linux; Android 7.1.1; E5823) AppleWebKit/537.36 (KHTML, like Gecko) Chrome/89.0.4389.105 Mobile Safari/537.36	http://medizinstudium.ruhr-uni-bochum.de/
1661	0	0	31	5822659	-77	936	-77	-77	-99	-99	d	2	10	24	1	2	1	0	0	0	0	-99	5	5	5	3	3	2	6	6	5	3	7	3	4	4	4	3	3	3	0	0	0	0	0	-99	Die Dopplungen machen die Umfrage etwas mühselig	Mozilla/5.0 (Linux; Android 10; SM-A750FN) AppleWebKit/537.36 (KHTML, like Gecko) Chrome/89.0.4389.105 Mobile Safari/537.36	http://medizinstudium.ruhr-uni-bochum.de/
1663	0	0	31	5822659	-77	707	-77	-77	-99	-99	d	2	2	20	2	2	1	0	0	0	0	-99	1	1	1	1	1	1	1	1	1	1	5	6	7	7	5	7	7	7	6	5	7	1	2	-99	-99	Mozilla/5.0 (iPhone; CPU iPhone OS 14_4_2 like Mac OS X) AppleWebKit/605.1.15 (KHTML, like Gecko) Version/14.0.3 Mobile/15E148 Safari/604.1	-99
1664	0	0	31	5822659	-77	1843	-77	-77	-99	-99	d	2	7	31	1	2	1	0	0	0	0	-99	6	2	5	4	6	6	6	6	4	2	7	5	3	3	2	2	3	2	5	4	4	2	2	-99	-99	Mozilla/5.0 (Windows NT 10.0; Win64; x64; rv:88.0) Gecko/20100101 Firefox/88.0	http://medizinstudium.ruhr-uni-bochum.de/
1665	0	0	31	5822659	-77	1809	-77	-77	-99	-99	d	2	5	23	2	2	1	0	0	0	0	-99	6	7	2	4	1	1	6	3	2	2	7	7	7	7	7	3	7	6	7	5	7	3	3	-99	-99	Mozilla/5.0 (Macintosh; Intel Mac OS X 10_15_6) AppleWebKit/605.1.15 (KHTML, like Gecko) Version/14.0.2 Safari/605.1.15	-99
1666	0	0	31	5822659	-77	1795	-77	-77	-99	-99	d	2	10	23	2	2	1	0	0	0	0	-99	5	5	5	3	2	1	5	2	2	2	7	7	7	7	7	4	7	7	7	4	4	3	3	-99	-99	Mozilla/5.0 (Linux; Android 8.0.0; SAMSUNG SM-A520F) AppleWebKit/537.36 (KHTML, like Gecko) SamsungBrowser/13.2 Chrome/83.0.4103.106 Mobile Safari/537.36	http://medizinstudium.ruhr-uni-bochum.de/medidek/infoszumstudium/schwarzesbrett/Index.cfm?&msg=25680
1667	0	0	32	5822659	-77	-1	-77	-77	-99	-99	d	2	10	25	1	2	0	1	0	0	0	-99	5	5	5	4	3	3	5	4	4	4	5	4	5	5	3	3	4	6	4	3	3	3	3	-99	-99	Mozilla/5.0 (Linux; Android 11; SM-G970F) AppleWebKit/537.36 (KHTML, like Gecko) Chrome/89.0.4389.105 Mobile Safari/537.36	android-app://com.google.android.gm/
1668	0	0	31	5822659	-77	1148	-77	-77	-99	-99	d	2	8	25	2	2	1	0	0	0	0	-99	4	5	5	5	3	2	5	5	3	3	6	5	5	5	4	4	4	5	7	1	1	4	3	-99	-99	Mozilla/5.0 (iPhone; CPU iPhone OS 14_4_1 like Mac OS X) AppleWebKit/605.1.15 (KHTML, like Gecko) Version/14.0.3 Mobile/15E148 Safari/604.1	-99
1669	0	0	31	5822659	-77	1079	-77	-77	-99	-99	d	2	8	24	2	2	1	0	0	0	0	-99	6	6	4	4	4	2	5	5	4	4	5	5	5	5	4	4	5	4	5	3	4	3	3	-99	-99	Mozilla/5.0 (iPhone; CPU iPhone OS 14_4_2 like Mac OS X) AppleWebKit/605.1.15 (KHTML, like Gecko) Version/14.0.3 Mobile/15E148 Safari/604.1	http://medizinstudium.ruhr-uni-bochum.de/medidek/infoszumstudium/schwarzesbrett/Index.cfm?&msg=25680
1670	0	0	31	5822659	-77	789	-77	-77	-99	-99	d	2	5	21	2	2	1	0	0	0	0	-99	7	7	7	6	5	2	7	3	2	2	7	5	5	5	4	2	5	6	4	4	7	3	3	-99	-99	Mozilla/5.0 (Macintosh; Intel Mac OS X 10_15_7) AppleWebKit/605.1.15 (KHTML, like Gecko) Version/14.0 Safari/605.1.15	-99
1671	0	0	31	5822659	-77	2281	-77	-77	-99	-99	d	2	2	19	2	2	0	1	0	0	0	-99	7	7	5	4	1	1	2	1	1	1	7	7	7	7	7	7	7	7	7	7	7	7	7	-99	-99	Mozilla/5.0 (Macintosh; Intel Mac OS X 10_15_6) AppleWebKit/605.1.15 (KHTML, like Gecko) Version/14.0.3 Safari/605.1.15	-99
1723	0	0	31	5822659	-77	1578	-77	-77	-99	-99	d	2	10	32	1	2	1	0	0	0	0	-99	7	6	5	5	1	2	6	5	4	2	7	5	5	4	5	4	5	5	5	3	4	4	4	-99	-99	Mozilla/5.0 (Macintosh; Intel Mac OS X 10_15_6) AppleWebKit/605.1.15 (KHTML, like Gecko) Version/14.0.3 Safari/605.1.15	http://medizinstudium.ruhr-uni-bochum.de/medidek/infoszumstudium/schwarzesbrett/Index.cfm?&msg=25680
1672	0	0	31	5822659	-77	1401	-77	-77	-99	-99	d	2	3	20	2	2	1	0	0	0	0	-99	7	7	5	5	2	2	2	2	3	1	7	6	5	0	2	1	6	5	7	1	1	2	2	-99	-99	Mozilla/5.0 (Windows NT 10.0; Win64; x64) AppleWebKit/537.36 (KHTML, like Gecko) Chrome/89.0.4389.114 Safari/537.36	https://webmail.stud.uni-giessen.de/
1673	0	0	31	5822659	-77	754	-77	-77	-99	-99	d	2	3	24	1	2	1	0	0	0	0	-99	5	5	4	5	3	3	4	4	2	2	7	6	6	5	6	6	5	5	5	5	6	6	5	-99	-99	Mozilla/5.0 (Windows NT 10.0; Win64; x64) AppleWebKit/537.36 (KHTML, like Gecko) Chrome/89.0.4389.114 Safari/537.36	-99
1674	0	0	31	5822659	-77	1001	-77	-77	-99	-99	d	2	2	19	2	2	1	0	0	0	0	-99	3	1	7	5	3	1	1	1	1	1	5	7	4	5	1	1	6	4	1	4	1	1	1	-99	-99	Mozilla/5.0 (iPhone; CPU iPhone OS 14_4_1 like Mac OS X) AppleWebKit/605.1.15 (KHTML, like Gecko) Version/14.0.3 Mobile/15E148 Safari/604.1	http://medizinstudium.ruhr-uni-bochum.de/medidek/infoszumstudium/schwarzesbrett/Index.cfm?&msg=25680
1676	0	0	31	5822659	-77	1504	-77	-77	-99	-99	d	2	4	19	1	2	0	1	0	0	0	-99	4	5	3	5	3	5	3	2	2	2	4	4	5	4	4	4	5	4	3	5	4	3	3	-99	-99	Mozilla/5.0 (Windows NT 10.0; Win64; x64) AppleWebKit/537.36 (KHTML, like Gecko) Chrome/89.0.4389.114 Safari/537.36 Edg/89.0.774.68	https://student.uniklinikum-leipzig.de/
1678	0	0	31	5822659	-77	1140	-77	-77	-99	-99	d	2	3	25	2	2	1	0	0	0	0	-99	3	3	7	6	1	1	1	1	1	1	7	7	7	7	7	5	7	7	7	5	7	5	5	-99	-99	Mozilla/5.0 (iPhone; CPU iPhone OS 14_4_2 like Mac OS X) AppleWebKit/605.1.15 (KHTML, like Gecko) Version/14.0.3 Mobile/15E148 Safari/604.1	https://wm.hrz.uni-giessen.de/horde/imp/smartmobile.php
1679	0	0	31	5822659	-77	1285	-77	-77	-99	-99	d	2	9	23	2	2	1	0	0	0	0	-99	7	7	6	4	2	2	6	4	4	2	7	7	7	6	3	4	7	7	6	4	6	4	4	-99	-99	Mozilla/5.0 (iPhone; CPU iPhone OS 14_4_2 like Mac OS X) AppleWebKit/605.1.15 (KHTML, like Gecko) Version/14.0.3 Mobile/15E148 Safari/604.1	-99
1680	0	0	31	5822659	-77	2083	-77	-77	-99	-99	d	2	8	30	2	2	1	0	0	0	0	-99	5	5	4	4	3	2	6	3	2	2	6	5	4	6	5	2	5	6	6	3	6	2	2	-99	-99	Mozilla/5.0 (Linux; Android 5.1.1; SM-T280) AppleWebKit/537.36 (KHTML, like Gecko) Chrome/89.0.4389.105 Safari/537.36	http://medizinstudium.ruhr-uni-bochum.de/
1681	0	0	31	5822659	-77	1309	-77	-77	-99	-99	d	2	1	20	2	2	1	0	0	0	0	-99	3	2	2	4	2	1	1	1	1	1	6	5	6	6	6	5	6	6	7	3	5	2	2	-99	-99	Mozilla/5.0 (Linux; Android 10; SNE-LX1) AppleWebKit/537.36 (KHTML, like Gecko) Chrome/89.0.4389.105 Mobile Safari/537.36	http://medizinstudium.ruhr-uni-bochum.de/
1682	0	0	31	5822659	-77	1311	-77	-77	-99	-99	d	2	2	24	1	2	1	0	0	0	0	-99	4	4	1	1	4	4	4	4	4	4	6	2	2	5	2	2	6	6	4	4	4	1	1	-99	Viele Dinge, die die Behandlung im Studium betreffen kann ich, der gerade im 2. Semester anfängt nicht beurteilen, das gilt auch für die Fähigkeit Patienten aufzuklären.	Mozilla/5.0 (Macintosh; Intel Mac OS X 10_15_6) AppleWebKit/605.1.15 (KHTML, like Gecko) Version/14.0.3 Safari/605.1.15	http://medizinstudium.ruhr-uni-bochum.de/medidek/infoszumstudium/schwarzesbrett/Index.cfm?&msg=25680
1683	0	0	32	5822659	-77	-1	-77	-77	-99	-99	d	2	7	22	1	2	1	0	0	0	0	-99	2	5	6	5	6	1	6	5	3	3	7	6	6	3	3	5	4	6	5	3	4	2	2	-99	-99	Mozilla/5.0 (Windows NT 10.0; Win64; x64; rv:87.0) Gecko/20100101 Firefox/87.0	-99
1685	0	0	31	5829623	-77	91	-77	-77	-99	-99	d	2	1	17	2	2	1	0	0	0	0	-99	-77	-77	-77	-77	-77	-77	-77	-77	-77	-77	-77	-77	-77	-77	-77	-77	-77	-77	-77	-77	-77	-77	-77	-66	-66	Mozilla/5.0 (iPhone; CPU iPhone OS 12_5_2 like Mac OS X) AppleWebKit/605.1.15 (KHTML, like Gecko) Version/12.1.2 Mobile/15E148 Safari/604.1	-99
1686	0	0	31	5822659	-77	845	-77	-77	-99	-99	d	2	8	29	1	2	1	0	0	0	0	-99	5	5	4	4	5	3	5	5	3	2	7	4	5	6	7	5	6	6	7	2	5	4	4	-99	-99	Mozilla/5.0 (Macintosh; Intel Mac OS X 10.15; rv:87.0) Gecko/20100101 Firefox/87.0	-99
1687	0	0	31	5822659	-77	1240	-77	-77	-99	-99	d	2	1	19	2	2	1	0	0	0	0	-99	0	0	0	0	3	4	1	1	1	1	7	7	7	3	0	0	5	0	0	0	0	0	5	-99	-99	Mozilla/5.0 (Linux; Android 11; SM-A405FN) AppleWebKit/537.36 (KHTML, like Gecko) Chrome/89.0.4389.105 Mobile Safari/537.36	http://medizinstudium.ruhr-uni-bochum.de/
1688	0	0	31	5822659	-77	536	-77	-77	-99	-99	d	2	2	21	1	2	1	0	0	0	0	-99	7	7	7	7	1	1	1	1	1	1	7	7	7	7	7	7	7	7	7	1	2	2	2	-99	-99	Mozilla/5.0 (Macintosh; Intel Mac OS X 10_15_7) AppleWebKit/605.1.15 (KHTML, like Gecko) Version/14.0.3 Safari/605.1.15	-99
1689	0	0	31	5822659	-77	785	-77	-77	-99	-99	d	2	2	20	1	2	1	0	0	0	0	-99	6	7	6	5	2	3	2	2	2	2	7	5	5	7	1	1	6	6	7	1	4	6	7	-99	-99	Mozilla/5.0 (Macintosh; Intel Mac OS X 10_15_6) AppleWebKit/605.1.15 (KHTML, like Gecko) Version/14.0.3 Safari/605.1.15	http://medizinstudium.ruhr-uni-bochum.de/medidek/infoszumstudium/schwarzesbrett/Index.cfm?&msg=25680
1690	0	0	31	5822659	-77	1795	-77	-77	-99	-99	d	3	13	25	1	2	1	0	0	0	0	-99	6	5	6	5	3	3	7	7	5	5	6	4	4	4	4	3	3	3	6	2	2	2	1	-99	-99	Mozilla/5.0 (iPhone; CPU iPhone OS 13_6 like Mac OS X) AppleWebKit/605.1.15 (KHTML, like Gecko) Version/13.1.2 Mobile/15E148 Safari/604.1	http://medizinstudium.ruhr-uni-bochum.de/medidek/infoszumstudium/schwarzesbrett/Index.cfm?&msg=25680
1691	0	0	31	5822659	-77	757	-77	-77	-99	-99	d	2	4	22	2	2	0	1	0	0	0	-99	3	2	2	2	3	2	3	2	3	3	7	7	5	5	6	6	6	6	2	6	6	2	2	-99	-99	Mozilla/5.0 (Linux; Android 8.1.0; DRA-L21) AppleWebKit/537.36 (KHTML, like Gecko) Chrome/88.0.4324.181 Mobile Safari/537.36 (Ecosia android@88.0.4324.181)	-99
1693	0	0	31	5822659	-77	1227	-77	-77	-99	-99	d	2	4	21	2	2	1	0	0	0	0	-99	5	4	3	3	3	3	7	6	2	2	5	4	4	5	4	4	5	4	3	4	6	1	1	-99	-99	Mozilla/5.0 (Linux; Android 8.0.0; SM-G930F) AppleWebKit/537.36 (KHTML, like Gecko) Chrome/89.0.4389.105 Mobile Safari/537.36	-99
1696	0	0	31	5822659	-77	850	-77	-77	-99	-99	d	2	5	23	2	2	1	0	0	0	0	-99	7	7	6	6	1	1	7	3	3	2	7	7	7	7	7	4	7	7	4	4	4	2	2	-99	-99	Mozilla/5.0 (iPhone; CPU iPhone OS 14_4_1 like Mac OS X) AppleWebKit/605.1.15 (KHTML, like Gecko) Version/14.0.3 Mobile/15E148 Safari/604.1	http://medizinstudium.ruhr-uni-bochum.de/medidek/infoszumstudium/schwarzesbrett/Index.cfm?&msg=25680
1697	0	0	31	5822659	-77	1259	-77	-77	-99	-99	d	2	10	32	1	2	1	0	0	0	0	-99	2	2	2	5	3	3	7	5	1	1	3	2	1	1	1	1	1	1	1	5	2	1	1	-99	-99	Mozilla/5.0 (Windows NT 10.0; Win64; x64; rv:87.0) Gecko/20100101 Firefox/87.0	-99
1698	0	0	31	5822659	-77	1047	-77	-77	-99	-99	d	2	2	19	2	2	1	0	0	0	0	-99	5	6	7	7	3	3	3	3	3	3	7	7	7	7	7	7	1	5	1	7	1	4	4	-99	-99	Mozilla/5.0 (iPhone; CPU iPhone OS 14_4_2 like Mac OS X) AppleWebKit/605.1.15 (KHTML, like Gecko) Version/14.0.3 Mobile/15E148 Safari/604.1	-99
1699	0	0	31	5822659	-77	1087	-77	-77	-99	-99	d	3	14	24	1	2	1	0	0	0	0	-99	7	7	5	5	1	1	7	7	5	5	7	5	5	6	2	2	5	4	4	4	4	4	4	-99	-99	Mozilla/5.0 (Windows NT 10.0; Win64; x64; rv:87.0) Gecko/20100101 Firefox/87.0	-99
1700	0	0	31	5812245	-77	11	-77	-77	-99	-99	d	1	-66	-66	-77	-77	-77	-77	-77	-77	-77	-66	-77	-77	-77	-77	-77	-77	-77	-77	-77	-77	-77	-77	-77	-77	-77	-77	-77	-77	-77	-77	-77	-77	-77	-66	-66	Mozilla/5.0 (iPhone; CPU iPhone OS 14_4_2 like Mac OS X) AppleWebKit/605.1.15 (KHTML, like Gecko) Version/14.0.3 Mobile/15E148 Safari/604.1	https://wm.hrz.uni-giessen.de/horde/imp/smartmobile.php
1701	0	0	32	5822659	-77	-1	-77	-77	-99	-99	d	2	10	28	2	2	1	0	0	0	0	-99	6	6	6	5	2	2	6	5	4	2	7	7	6	6	4	5	5	6	4	4	4	4	4	-99	-99	Mozilla/5.0 (Linux; Android 10; Mi 9 Lite) AppleWebKit/537.36 (KHTML, like Gecko) Chrome/89.0.4389.105 Mobile Safari/537.36	https://wm.hrz.uni-giessen.de/
1702	0	0	31	5822659	-77	1215	-77	-77	-99	-99	d	2	2	26	2	2	0	1	0	0	0	-99	6	6	6	6	2	1	1	2	1	1	7	6	6	6	5	5	6	4	4	4	4	4	4	-99	-99	Mozilla/5.0 (iPhone; CPU iPhone OS 14_4_1 like Mac OS X) AppleWebKit/605.1.15 (KHTML, like Gecko) Version/14.0.3 Mobile/15E148 Safari/604.1	http://medizinstudium.ruhr-uni-bochum.de/medidek/infoszumstudium/schwarzesbrett/Index.cfm?&msg=25680
1703	0	0	32	5822659	-77	-1	-77	-77	-99	-99	d	2	5	22	1	2	1	0	0	0	0	-99	4	6	5	5	2	2	2	2	2	2	6	6	5	5	6	6	5	5	5	5	5	5	5	-99	-99	Mozilla/5.0 (iPhone; CPU iPhone OS 14_4 like Mac OS X) AppleWebKit/605.1.15 (KHTML, like Gecko) Version/14.0.3 Mobile/15E148 Safari/604.1	-99
1704	0	0	31	5822659	-77	828	-77	-77	-99	-99	d	2	6	22	2	1	0	1	0	0	0	-99	2	4	1	5	5	5	6	6	1	1	6	6	6	6	6	6	6	6	6	6	7	5	5	-99	-99	Mozilla/5.0 (Windows NT 10.0; Win64; x64; rv:87.0) Gecko/20100101 Firefox/87.0	-99
1705	0	0	31	5822659	-77	1627	-77	-77	-99	-99	d	2	17	39	2	3	0	1	0	0	0	-99	6	7	7	7	6	5	5	3	5	4	7	4	5	5	5	5	6	4	4	4	4	6	4	-99	%	Mozilla/5.0 (iPhone; CPU iPhone OS 14_4_1 like Mac OS X) AppleWebKit/605.1.15 (KHTML, like Gecko) Version/14.0.3 Mobile/15E148 Safari/604.1	-99
1706	0	0	31	5812245	-77	15	-77	-77	-99	-99	d	4	-66	-66	-77	-77	-77	-77	-77	-77	-77	-66	-77	-77	-77	-77	-77	-77	-77	-77	-77	-77	-77	-77	-77	-77	-77	-77	-77	-77	-77	-77	-77	-77	-77	-66	-66	Mozilla/5.0 (Android 9; Mobile; rv:87.0) Gecko/87.0 Firefox/87.0	-99
1707	0	0	31	5822659	-77	972	-77	-77	-99	-99	d	2	2	19	2	2	1	0	0	0	0	-99	4	4	4	4	2	3	2	3	3	2	7	7	6	6	7	6	6	7	5	7	6	6	5	-99	-99	Mozilla/5.0 (Macintosh; Intel Mac OS X 10_15_6) AppleWebKit/605.1.15 (KHTML, like Gecko) Version/14.0.3 Safari/605.1.15	-99
1708	0	0	31	5822659	-77	1001	-77	-77	-99	-99	d	2	8	23	2	2	0	1	0	0	0	-99	4	3	1	1	5	1	5	5	1	1	7	7	7	7	5	5	7	7	7	3	3	1	1	-99	-99	Mozilla/5.0 (iPhone; CPU iPhone OS 14_4_2 like Mac OS X) AppleWebKit/605.1.15 (KHTML, like Gecko) Mobile/15E148 Version/13.1 (Ecosia ios@4.1.10.875) Safari/604.1	http://medizinstudium.ruhr-uni-bochum.de/medidek/infoszumstudium/schwarzesbrett/Index.cfm?&msg=25680
1710	0	0	31	5822659	-77	729	-77	-77	-99	-99	d	2	9	23	2	2	1	0	0	0	0	-99	7	7	5	6	4	4	6	3	2	2	7	6	6	6	6	6	7	6	2	5	5	3	3	-99	-99	Mozilla/5.0 (Windows NT 10.0; Win64; x64) AppleWebKit/537.36 (KHTML, like Gecko) Chrome/89.0.4389.90 Safari/537.36 Edg/89.0.774.63	https://webmail.stud.uni-giessen.de/
1711	0	0	31	5822659	-77	1739	-77	-77	-99	-99	d	2	5	21	2	2	1	0	0	0	0	-99	2	1	3	2	3	3	5	4	1	1	5	4	4	4	4	3	5	4	2	5	6	3	2	-99	-99	Mozilla/5.0 (iPhone; CPU iPhone OS 14_4_2 like Mac OS X) AppleWebKit/605.1.15 (KHTML, like Gecko) Version/14.0.3 Mobile/15E148 Safari/604.1	http://medizinstudium.ruhr-uni-bochum.de/medidek/infoszumstudium/schwarzesbrett/Index.cfm?&msg=25680
1712	0	0	31	5822659	-77	1067	-77	-77	-99	-99	d	2	4	21	2	2	0	0	0	1	0	-99	7	6	2	4	5	3	7	4	2	5	7	6	6	5	3	4	2	7	6	2	7	1	6	-99	-99	Mozilla/5.0 (iPhone; CPU iPhone OS 14_4_1 like Mac OS X) AppleWebKit/605.1.15 (KHTML, like Gecko) Version/14.0.3 Mobile/15E148 Safari/604.1	-99
1713	0	0	31	5822659	-77	835	-77	-77	-99	-99	d	2	4	21	1	2	0	0	0	1	0	-99	7	7	7	7	3	2	2	3	3	2	3	2	2	2	3	2	2	3	3	3	2	1	1	-99	-99	Mozilla/5.0 (Linux; U; Android 10; de-de; Mi 9T Build/QKQ1.190825.002) AppleWebKit/537.36 (KHTML, like Gecko) Version/4.0 Chrome/79.0.3945.147 Mobile Safari/537.36 XiaoMi/MiuiBrowser/12.9.3-gn	-99
1714	0	0	31	5822659	-77	676	-77	-77	-99	-99	d	2	4	20	2	2	0	0	0	1	0	-99	6	5	4	5	3	2	3	2	2	3	6	5	2	2	1	1	5	5	5	2	4	1	2	-99	-99	Mozilla/5.0 (iPhone; CPU iPhone OS 14_4 like Mac OS X) AppleWebKit/605.1.15 (KHTML, like Gecko) Version/14.0.3 Mobile/15E148 Safari/604.1	-99
1715	0	0	31	5822659	-77	1599	-77	-77	-99	-99	d	2	4	19	2	2	1	0	0	0	0	-99	4	2	1	2	3	3	5	6	2	5	7	6	5	5	5	6	7	6	5	3	6	3	3	-99	-99	Mozilla/5.0 (Linux; Android 10; MAR-LX1A) AppleWebKit/537.36 (KHTML, like Gecko) Chrome/88.0.4324.181 Mobile Safari/537.36 (Ecosia android@88.0.4324.181)	-99
1716	0	0	31	5822659	-77	1834	-77	-77	-99	-99	d	2	4	20	2	2	0	1	0	1	0	-99	3	4	4	5	5	2	5	3	3	2	7	7	6	7	4	3	6	6	6	5	5	3	3	-99	-99	Mozilla/5.0 (iPhone; CPU iPhone OS 14_2 like Mac OS X) AppleWebKit/605.1.15 (KHTML, like Gecko) Version/14.0.1 Mobile/15E148 Safari/604.1	-99
1717	0	0	31	5822659	-77	1364	-77	-77	-99	-99	d	2	4	29	1	2	0	1	0	0	0	-99	5	6	5	5	3	2	2	2	1	1	6	6	7	7	6	7	7	7	5	5	6	6	5	Dabei schon real impfen, jeder hat sicher irgendwas aufzufrischen Freiwillig	-99	Mozilla/5.0 (iPhone; CPU iPhone OS 14_4_2 like Mac OS X) AppleWebKit/605.1.15 (KHTML, like Gecko) Version/14.0.3 Mobile/15E148 Safari/604.1	-99
1720	0	0	31	5822659	-77	1058	-77	-77	-99	-99	d	2	4	20	2	2	0	0	0	1	0	-99	4	5	4	4	2	2	2	2	2	2	6	0	5	0	3	0	5	5	0	0	0	0	0	-99	-99	Mozilla/5.0 (Linux; Android 8.0.0; SM-A520F) AppleWebKit/537.36 (KHTML, like Gecko) Chrome/85.0.4183.127 Mobile Safari/537.36 (Ecosia android@85.0.4183.127)	-99
1721	0	0	31	5822659	-77	1053	-77	-77	-99	-99	d	2	2	19	2	2	1	1	0	0	0	-99	6	6	2	5	1	1	1	1	1	1	7	7	7	7	7	7	7	7	7	2	3	3	3	-99	-99	Mozilla/5.0 (Macintosh; Intel Mac OS X 10_15_6) AppleWebKit/605.1.15 (KHTML, like Gecko) Version/14.0.3 Safari/605.1.15	http://medizinstudium.ruhr-uni-bochum.de/medidek/infoszumstudium/schwarzesbrett/Index.cfm?&msg=25680
1840	0	0	31	5822659	-77	722	-77	-77	-99	-99	d	2	2	22	2	2	1	0	0	0	0	-99	7	7	7	7	1	1	1	1	1	1	7	7	4	7	1	4	7	4	4	4	4	4	4	-99	-99	Mozilla/5.0 (Windows NT 10.0; Win64; x64; rv:87.0) Gecko/20100101 Firefox/87.0	-99
1724	0	0	31	5822659	-77	1144	-77	-77	-99	-99	d	2	10	29	2	2	1	0	0	0	0	-99	7	7	6	6	1	1	3	3	2	2	6	6	6	5	3	3	6	6	6	6	6	5	5	-99	-99	Mozilla/5.0 (X11; Ubuntu; Linux x86_64; rv:87.0) Gecko/20100101 Firefox/87.0	-99
1722	0	0	31	5822659	-77	1099	-77	-77	-99	-99	d	2	6	25	1	2	1	0	0	0	0	-99	5	5	5	4	2	2	2	2	2	2	6	5	5	5	5	3	5	3	3	5	3	3	3	in meiner Hausarztfamulatur habe ich gemerkt, dass viele Patienten extrem auf den Rat ihres Hausarztes hören. Die Ärzte konnten viele Patienten zur Covid Impfung bewegen, die das vorher nicht wollten. Außerdem war es in der Praxis Routine, den Impfstatus bei jedem Patientenbesuch zu überprüfen, so dass der Großteil der Patienten aus der Praxis sehr gut durchgeimpft war. Diese Methode fand ich seh…	-99	Mozilla/5.0 (Windows NT 10.0; Win64; x64) AppleWebKit/537.36 (KHTML, like Gecko) Chrome/89.0.4389.114 Safari/537.36	-99
1725	0	0	31	5822659	-77	1641	-77	-77	-99	-99	d	2	4	20	2	2	0	0	0	1	0	-99	5	7	4	4	1	1	1	1	1	1	5	2	2	5	2	1	2	2	2	5	2	2	2	-99	-99	Mozilla/5.0 (iPhone; CPU iPhone OS 14_4_2 like Mac OS X) AppleWebKit/605.1.15 (KHTML, like Gecko) Version/14.0.3 Mobile/15E148 Safari/604.1	-99
3186	0	0	31	5822659	-77	897	-77	-77	-99	-99	d	2	3	29	2	2	0	1	0	0	0	-99	4	4	5	5	3	3	3	5	4	3	7	7	7	7	3	4	7	5	3	6	7	7	7	-99	-99	Mozilla/5.0 (Linux; Android 10; SAMSUNG SM-G965F) AppleWebKit/537.36 (KHTML, like Gecko) SamsungBrowser/13.2 Chrome/83.0.4103.106 Mobile Safari/537.36	-99
1726	0	0	31	5822659	-77	1085	-77	-77	-99	-99	d	2	2	25	2	2	1	0	0	0	0	-99	6	6	6	6	1	5	1	1	1	1	6	4	5	5	5	4	6	6	4	4	4	3	3	-99	-99	Mozilla/5.0 (iPhone; CPU iPhone OS 14_4_2 like Mac OS X) AppleWebKit/605.1.15 (KHTML, like Gecko) Version/14.0.3 Mobile/15E148 Safari/604.1	-99
1727	0	0	31	5822659	-77	1020	-77	-77	-99	-99	d	2	4	28	1	2	0	1	0	0	0	-99	7	7	7	7	1	1	1	1	1	1	7	7	5	4	4	4	6	7	4	4	4	1	1	-99	-99	Mozilla/5.0 (iPhone; CPU iPhone OS 14_4_2 like Mac OS X) AppleWebKit/605.1.15 (KHTML, like Gecko) Version/14.0.3 Mobile/15E148 Safari/604.1	-99
1728	0	0	31	5822659	-77	1010	-77	-77	-99	-99	d	2	4	21	2	2	0	0	0	1	0	-99	6	5	4	3	3	2	3	4	4	0	6	4	3	0	0	0	0	0	0	0	0	0	0	-99	-99	Mozilla/5.0 (iPhone; CPU iPhone OS 14_4 like Mac OS X) AppleWebKit/605.1.15 (KHTML, like Gecko) Version/14.0.3 Mobile/15E148 Safari/604.1	-99
1730	0	0	31	5822659	-77	810	-77	-77	-99	-99	d	2	1	19	2	2	1	0	0	0	0	-99	4	3	2	2	2	1	1	1	1	1	7	6	6	6	6	6	6	6	6	2	3	5	4	-99	-99	Mozilla/5.0 (Windows NT 10.0; Win64; x64; rv:87.0) Gecko/20100101 Firefox/87.0	http://medizinstudium.ruhr-uni-bochum.de/
1731	0	0	31	5822659	-77	622	-77	-77	-99	-99	d	2	6	21	2	1	0	1	0	0	0	-99	6	6	5	6	4	3	3	3	2	1	7	7	7	7	7	7	7	7	7	7	7	7	7	-99	-99	Mozilla/5.0 (Macintosh; Intel Mac OS X 10_15_6) AppleWebKit/605.1.15 (KHTML, like Gecko) Version/14.0 Safari/605.1.15	https://student.uniklinikum-leipzig.de/studium/allgemeines_interessantes.php
1733	0	0	31	5822659	-77	978	-77	-77	-99	-99	d	2	6	21	2	2	1	0	0	0	0	-99	6	6	2	2	1	1	1	1	1	1	7	7	7	5	5	4	5	4	5	3	4	4	4	-99	-99	Mozilla/5.0 (Windows NT 10.0; Win64; x64) AppleWebKit/537.36 (KHTML, like Gecko) Chrome/89.0.4389.114 Safari/537.36 Edg/89.0.774.68	https://deref-web.de/
1734	0	0	31	5822659	-77	1055	-77	-77	-99	-99	d	2	3	23	2	2	0	1	0	0	0	-99	6	6	4	5	4	4	4	4	4	4	7	7	7	4	4	5	4	5	4	4	4	3	3	-99	-99	Mozilla/5.0 (Macintosh; Intel Mac OS X 10_15_6) AppleWebKit/605.1.15 (KHTML, like Gecko) Version/14.0.3 Safari/605.1.15	-99
1735	0	0	31	5822659	-77	5003	-77	-77	-99	-99	d	2	4	30	1	1	1	0	0	0	0	-99	7	7	7	7	1	1	7	7	7	7	7	7	4	7	7	7	7	7	4	4	7	1	1	-99	Viel zu lang gestaltet.	Mozilla/5.0 (Linux; Android 8.0.0; G3421) AppleWebKit/537.36 (KHTML, like Gecko) Chrome/89.0.4389.105 Mobile Safari/537.36	-99
1737	0	0	31	5822659	-77	866	-77	-77	-99	-99	d	2	2	18	2	2	1	0	0	0	0	-99	2	1	1	1	1	1	1	1	1	1	7	7	7	7	7	7	7	7	7	7	7	5	5	-99	-99	Mozilla/5.0 (Windows NT 10.0; Win64; x64) AppleWebKit/537.36 (KHTML, like Gecko) Chrome/89.0.4389.114 Safari/537.36 Edg/89.0.774.68	-99
1736	0	0	31	5822659	-77	711	-77	-77	-99	-99	d	2	4	22	2	2	1	0	0	0	0	-99	7	7	5	5	2	1	2	2	2	2	7	7	7	4	7	7	5	7	7	5	7	4	4	-99	-99	Mozilla/5.0 (Linux; Android 10; SM-T830) AppleWebKit/537.36 (KHTML, like Gecko) Chrome/89.0.4389.105 Safari/537.36	-99
1738	0	0	31	5822659	-77	764	-77	-77	-99	-99	d	2	6	31	2	2	1	0	0	0	0	-99	7	7	7	7	2	1	7	4	1	2	7	7	7	7	5	4	6	5	7	4	7	7	4	-99	-99	Mozilla/5.0 (Macintosh; Intel Mac OS X 10_15_6) AppleWebKit/605.1.15 (KHTML, like Gecko) Version/14.0.3 Safari/605.1.15	http://medizinstudium.ruhr-uni-bochum.de/medidek/infoszumstudium/schwarzesbrett/Index.cfm?&msg=25680
1742	0	0	31	5822659	-77	1097	-77	-77	-99	-99	d	2	4	21	1	2	0	0	0	0	1	Freunde	5	7	6	7	2	1	4	1	1	1	7	7	4	7	1	4	7	7	4	4	4	2	2	-99	-99	Mozilla/5.0 (Linux; Android 10; SAMSUNG SM-A505FN) AppleWebKit/537.36 (KHTML, like Gecko) SamsungBrowser/13.2 Chrome/83.0.4103.106 Mobile Safari/537.36	-99
1739	0	0	31	5822659	-77	740	-77	-77	-99	-99	d	2	6	21	1	2	1	0	0	0	0	-99	6	7	6	6	7	5	6	4	2	2	7	7	4	6	7	2	7	7	7	1	5	5	5	-99	-99	Mozilla/5.0 (Windows NT 10.0; Win64; x64; rv:87.0) Gecko/20100101 Firefox/87.0	-99
1740	0	0	31	5822659	-77	1670	-77	-77	-99	-99	d	2	5	29	1	2	1	0	0	0	0	-99	6	6	5	6	2	1	1	1	1	1	7	7	7	7	7	7	7	7	6	6	6	7	7	-99	-99	Mozilla/5.0 (Windows NT 10.0; Win64; x64) AppleWebKit/537.36 (KHTML, like Gecko) Chrome/89.0.4389.114 Safari/537.36	-99
1741	0	0	31	5822659	-77	1319	-77	-77	-99	-99	d	2	4	29	1	2	1	0	0	0	0	-99	6	7	6	5	3	1	1	1	2	1	7	6	6	5	6	6	5	4	4	4	6	4	4	-99	-99	Mozilla/5.0 (Windows NT 10.0; Win64; x64; rv:87.0) Gecko/20100101 Firefox/87.0	-99
3185	0	0	31	5822659	-77	1040	-77	-77	-99	-99	d	2	7	24	2	2	1	0	0	0	0	-99	7	6	4	5	1	1	3	3	2	2	7	6	5	6	4	4	7	7	4	4	4	1	1	-99	-99	Mozilla/5.0 (Windows NT 10.0; Win64; x64; rv:87.0) Gecko/20100101 Firefox/87.0	https://deref-gmx.net/
1743	0	0	31	5822659	-77	2382	-77	-77	-99	-99	d	5	6	25	2	2	1	0	0	0	0	-99	4	4	6	5	4	4	4	4	4	4	5	5	5	4	4	4	4	4	4	4	4	4	4	-99	-99	Mozilla/5.0 (Linux; Android 9; ANE-LX1) AppleWebKit/537.36 (KHTML, like Gecko) Chrome/89.0.4389.105 Mobile Safari/537.36	-99
1744	0	0	31	5822659	-77	952	-77	-77	-99	-99	d	2	4	26	2	2	0	1	0	0	0	-99	2	2	4	5	1	1	1	1	1	1	7	7	7	3	5	3	2	3	3	3	5	1	1	-99	-99	Mozilla/5.0 (Linux; Android 8.0.0; SHIFT6m Build/O00623) AppleWebKit/537.36 (KHTML, like Gecko) Chrome/69.0.3497.128 Mobile Safari/537.36 (Ecosia android@69.0.3497.128)	https://webmail.stud.uni-giessen.de/horde/imp/smartmobile.php
1746	0	0	31	5822659	-77	1113	-77	-77	-99	-99	d	2	3	54	2	2	1	0	0	0	0	-99	3	3	3	7	7	3	3	2	6	3	7	7	7	7	7	7	7	7	2	7	2	7	7	-99	-99	Mozilla/5.0 (iPhone; CPU iPhone OS 14_4_2 like Mac OS X) AppleWebKit/605.1.15 (KHTML, like Gecko) Version/14.0.3 Mobile/15E148 Safari/604.1	-99
1747	0	0	31	5822659	-77	1465	-77	-77	-99	-99	d	3	12	26	1	2	1	0	0	0	0	-99	7	5	6	1	0	0	5	2	1	1	7	6	6	6	6	5	6	7	4	0	0	0	0	-99	-99	Mozilla/5.0 (Linux; Android 11; SM-G973F) AppleWebKit/537.36 (KHTML, like Gecko) Chrome/88.0.4324.181 Mobile Safari/537.36 (Ecosia android@88.0.4324.181)	-99
1748	0	0	31	5822659	-77	1042	-77	-77	-99	-99	d	2	8	21	2	2	1	0	0	0	0	-99	5	6	5	6	1	1	3	5	5	3	6	5	3	2	2	2	4	5	5	6	6	1	1	-99	-99	Mozilla/5.0 (Macintosh; Intel Mac OS X 10_15_6) AppleWebKit/605.1.15 (KHTML, like Gecko) Version/14.0.3 Safari/605.1.15	https://wm.hrz.uni-giessen.de/horde/imp/dynamic.php?page=mailbox
1749	0	0	31	5822659	-77	1109	-77	-77	-99	-99	d	2	10	24	2	2	1	0	0	0	0	-99	2	2	2	2	2	2	4	3	3	2	7	7	6	6	4	4	5	6	2	4	4	2	2	-99	-99	Mozilla/5.0 (Macintosh; Intel Mac OS X 10_15_6) AppleWebKit/605.1.15 (KHTML, like Gecko) Version/14.0.1 Safari/605.1.15	-99
1751	0	0	31	5822659	-77	968	-77	-77	-99	-99	d	2	7	24	2	2	0	1	0	0	0	-99	5	6	4	4	0	0	0	0	0	0	0	0	0	0	0	0	0	0	0	0	0	0	0	-99	-99	Mozilla/5.0 (iPhone; CPU iPhone OS 14_4_2 like Mac OS X) AppleWebKit/605.1.15 (KHTML, like Gecko) Version/14.0.3 Mobile/15E148 Safari/604.1	-99
1752	0	0	32	5822659	-77	-1	-77	-77	-99	-99	d	2	7	28	2	2	1	0	0	0	0	-99	6	7	4	5	5	7	7	5	6	3	7	7	7	7	6	3	6	6	4	6	7	3	3	-99	-99	Mozilla/5.0 (iPhone; CPU iPhone OS 14_1 like Mac OS X) AppleWebKit/605.1.15 (KHTML, like Gecko) Version/14.0 Mobile/15E148 Safari/604.1	-99
1755	0	0	31	5822659	-77	2054	-77	-77	-99	-99	d	2	2	41	2	3	0	1	0	0	0	-99	6	6	6	6	7	7	6	6	6	7	7	7	7	6	5	6	7	7	6	6	7	7	7	-99	-99	Mozilla/5.0 (Macintosh; Intel Mac OS X 10_15_7) AppleWebKit/537.36 (KHTML, like Gecko) Chrome/87.0.4280.141 Safari/537.36	-99
1753	0	0	31	5822659	-77	1198	-77	-77	-99	-99	d	2	5	28	2	2	0	1	0	0	0	-99	6	7	6	5	6	6	6	6	5	6	7	6	7	4	5	5	7	5	4	4	6	4	6	-99	-99	Mozilla/5.0 (iPhone; CPU iPhone OS 14_4_2 like Mac OS X) AppleWebKit/605.1.15 (KHTML, like Gecko) Version/14.0.3 Mobile/15E148 Safari/604.1	-99
1754	0	0	31	5822659	-77	1591	-77	-77	-99	-99	d	2	7	28	2	2	0	1	0	0	0	-99	5	3	4	5	6	5	6	5	2	2	7	5	5	4	1	3	4	4	2	3	2	1	1	-99	-99	Mozilla/5.0 (Linux; Android 11; SAMSUNG SM-N981B) AppleWebKit/537.36 (KHTML, like Gecko) SamsungBrowser/13.2 Chrome/83.0.4103.106 Mobile Safari/537.36	-99
1756	0	0	31	5812245	-77	10	-77	-77	-99	-99	d	1	-66	-66	-77	-77	-77	-77	-77	-77	-77	-66	-77	-77	-77	-77	-77	-77	-77	-77	-77	-77	-77	-77	-77	-77	-77	-77	-77	-77	-77	-77	-77	-77	-77	-66	-66	Mozilla/5.0 (Macintosh; Intel Mac OS X 10_15_6) AppleWebKit/605.1.15 (KHTML, like Gecko) Version/14.0.3 Safari/605.1.15	-99
1758	0	0	31	5822659	-77	845	-77	-77	-99	-99	d	2	7	25	2	2	0	1	0	0	0	-99	7	7	7	7	7	7	7	6	6	6	7	7	6	6	4	4	6	4	4	4	4	4	4	-99	-99	Mozilla/5.0 (Macintosh; Intel Mac OS X 10_15_6) AppleWebKit/605.1.15 (KHTML, like Gecko) Version/14.0.3 Safari/605.1.15	-99
1759	0	0	31	5822659	-77	1940	-77	-77	-99	-99	d	2	6	25	2	2	0	1	0	0	0	-99	6	7	7	5	7	7	7	6	6	4	7	5	6	4	3	4	5	4	3	5	3	3	3	Meine Uni unterrichtet sehr praxisorientierte sodass wir auch während der online Lehre Patientengespräche üben konnten. Es wäre gut einen Pol-Fall dazu zu haben um in einer Woche dieses wichtige Thema durcharbeiten zu können.	-99	Mozilla/5.0 (iPhone; CPU iPhone OS 14_4_2 like Mac OS X) AppleWebKit/605.1.15 (KHTML, like Gecko) Version/14.0.3 Mobile/15E148 Safari/604.1	-99
1762	0	0	31	5822659	-77	1458	-77	-77	-99	-99	d	2	5	23	1	2	0	1	0	0	0	-99	6	6	4	6	7	7	5	5	4	2	2	4	4	6	5	5	5	5	4	4	5	4	3	-99	-99	Mozilla/5.0 (Linux; Android 10; CLT-L29) AppleWebKit/537.36 (KHTML, like Gecko) Chrome/89.0.4389.105 Mobile Safari/537.36	-99
1764	0	0	31	5822659	-77	1777	-77	-77	-99	-99	d	2	7	21	2	2	1	0	0	0	0	-99	6	7	7	7	6	5	7	4	2	2	7	7	6	7	7	4	7	7	7	2	2	1	1	-99	-99	Mozilla/5.0 (Macintosh; Intel Mac OS X 10_14_6) AppleWebKit/605.1.15 (KHTML, like Gecko) Version/14.0.3 Safari/605.1.15	https://student.uniklinikum-leipzig.de/studium/allgemeines_interessantes.php
1766	0	0	31	5822659	-77	1269	-77	-77	-99	-99	d	2	4	20	2	2	1	0	0	0	0	-99	4	5	5	4	5	0	4	5	5	3	6	5	5	5	4	4	5	5	6	3	3	3	3	-99	-99	Mozilla/5.0 (iPhone; CPU iPhone OS 14_4_2 like Mac OS X) AppleWebKit/605.1.15 (KHTML, like Gecko) Version/14.0.3 Mobile/15E148 Safari/604.1	-99
1767	0	0	31	5822659	-77	639	-77	-77	-99	-99	d	2	3	27	2	2	1	0	0	0	0	-99	7	7	7	6	7	7	7	7	3	2	7	7	7	7	7	7	7	6	7	7	6	6	6	-99	-99	Mozilla/5.0 (Linux; Android 10; ONEPLUS A5010) AppleWebKit/537.36 (KHTML, like Gecko) Chrome/89.0.4389.105 Mobile Safari/537.36	-99
1768	0	0	31	5822659	-77	941	-77	-77	-99	-99	d	2	2	18	1	2	1	0	0	0	0	-99	7	6	5	5	5	5	4	4	4	4	6	6	6	6	5	5	6	6	5	5	5	2	2	-99	-99	Mozilla/5.0 (Windows NT 10.0; Win64; x64) AppleWebKit/537.36 (KHTML, like Gecko) Chrome/89.0.4389.114 Safari/537.36	-99
1769	0	0	31	5822659	-77	1916	-77	-77	-99	-99	d	2	2	23	2	2	0	1	0	0	0	-99	2	4	4	6	3	5	3	3	4	3	6	6	6	6	6	6	6	6	6	6	6	4	4	-99	-99	Mozilla/5.0 (iPhone; CPU iPhone OS 14_4_2 like Mac OS X) AppleWebKit/605.1.15 (KHTML, like Gecko) Version/14.0.3 Mobile/15E148 Safari/604.1	-99
1771	0	0	31	5812245	-77	17	-77	-77	-99	-99	d	1	-66	-66	-77	-77	-77	-77	-77	-77	-77	-66	-77	-77	-77	-77	-77	-77	-77	-77	-77	-77	-77	-77	-77	-77	-77	-77	-77	-77	-77	-77	-77	-77	-77	-66	-66	Mozilla/5.0 (Linux; Android 10; MI 9) AppleWebKit/537.36 (KHTML, like Gecko) Chrome/88.0.4324.181 Mobile Safari/537.36 (Ecosia android@88.0.4324.181)	https://wm.hrz.uni-giessen.de/
1789	0	0	31	5822659	-77	1013	-77	-77	-99	-99	d	2	2	25	2	2	0	1	0	0	0	-99	7	7	6	7	5	6	6	6	6	4	7	7	7	7	7	7	7	7	1	7	1	5	5	-99	Es sollte den Punkt geben bei dem Grund, wieso man noch nicht geimpft wurde, dass eine Covid-19 Erkrankung vorlag und man deshalb noch nicht geimpft werden kann.	Mozilla/5.0 (Macintosh; Intel Mac OS X 10_15_6) AppleWebKit/605.1.15 (KHTML, like Gecko) Version/14.0.3 Safari/605.1.15	-99
1773	0	0	31	5822659	-77	1186	-77	-77	-99	-99	d	2	4	23	2	2	0	1	0	1	0	-99	2	1	2	5	1	1	2	1	1	1	7	7	7	7	1	5	7	7	7	7	7	2	1	-99	-99	Mozilla/5.0 (Linux; Android 10; MAR-LX1A) AppleWebKit/537.36 (KHTML, like Gecko) Chrome/89.0.4389.105 Mobile Safari/537.36	-99
1774	0	0	31	5822659	-77	1452	-77	-77	-99	-99	d	2	3	26	2	2	1	1	0	0	0	-99	6	6	6	5	2	6	6	2	4	4	7	6	5	4	4	5	6	5	5	6	4	3	2	-99	-99	Mozilla/5.0 (Linux; Android 11; SAMSUNG SM-G970F) AppleWebKit/537.36 (KHTML, like Gecko) SamsungBrowser/13.2 Chrome/83.0.4103.106 Mobile Safari/537.36	-99
1777	0	0	31	5822659	-77	1184	-77	-77	-99	-99	d	2	3	27	2	2	0	1	0	0	0	-99	6	5	4	5	5	5	4	4	3	3	6	5	3	5	3	3	3	3	4	4	5	3	3	-99	-99	Mozilla/5.0 (Macintosh; Intel Mac OS X 10_15_3) AppleWebKit/605.1.15 (KHTML, like Gecko) Version/13.0.5 Safari/605.1.15	-99
1775	0	0	31	5822659	-77	980	-77	-77	-99	-99	d	2	6	28	1	2	1	0	0	0	0	-99	7	7	7	7	5	5	6	6	5	4	7	6	6	7	5	5	7	6	5	3	7	5	5	-99	-99	Mozilla/5.0 (Windows NT 10.0; Win64; x64; rv:87.0) Gecko/20100101 Firefox/87.0	-99
1776	0	0	31	5812245	-77	22	-77	-77	-99	-99	d	1	-66	-66	-77	-77	-77	-77	-77	-77	-77	-66	-77	-77	-77	-77	-77	-77	-77	-77	-77	-77	-77	-77	-77	-77	-77	-77	-77	-77	-77	-77	-77	-77	-77	-66	-66	Mozilla/5.0 (Macintosh; Intel Mac OS X 10_15_7) AppleWebKit/605.1.15 (KHTML, like Gecko) Version/14.0.3 Safari/605.1.15	-99
1779	0	0	31	5822659	-77	944	-77	-77	-99	-99	d	2	7	22	2	2	1	0	0	0	0	-99	5	7	5	4	3	2	5	2	2	2	5	5	1	5	1	3	5	5	4	7	5	5	5	-99	-99	Mozilla/5.0 (Windows NT 10.0; Win64; x64) AppleWebKit/537.36 (KHTML, like Gecko) Chrome/89.0.4389.114 Safari/537.36	-99
1781	0	0	31	5822659	-77	691	-77	-77	-99	-99	d	2	5	27	1	2	0	1	0	0	0	-99	7	7	6	6	6	7	5	5	4	3	7	7	7	7	7	7	7	5	4	4	6	4	4	-99	-99	Mozilla/5.0 (Windows NT 10.0; Win64; x64) AppleWebKit/537.36 (KHTML, like Gecko) Chrome/89.0.4389.114 Safari/537.36	-99
1782	0	0	31	5822659	-77	1373	-77	-77	-99	-99	d	2	7	25	2	2	0	1	0	0	0	-99	6	7	6	5	6	7	5	7	5	5	7	5	6	5	4	4	5	6	4	4	4	1	1	-99	-99	Mozilla/5.0 (iPhone; CPU iPhone OS 14_4_1 like Mac OS X) AppleWebKit/605.1.15 (KHTML, like Gecko) Version/14.0.3 Mobile/15E148 Safari/604.1	-99
1783	0	0	31	5822659	-77	928	-77	-77	-99	-99	d	2	5	22	2	2	0	0	0	0	1	Schwarzes Brett online	6	7	5	5	5	4	7	4	3	3	7	6	6	0	5	5	5	4	6	3	3	1	1	-99	-99	Mozilla/5.0 (Windows NT 10.0; Win64; x64) AppleWebKit/537.36 (KHTML, like Gecko) Chrome/89.0.4389.90 Safari/537.36 Edg/89.0.774.63	-99
1784	0	0	31	5822659	-77	871	-77	-77	-99	-99	d	2	9	25	2	2	0	1	0	0	0	-99	6	7	5	5	5	3	6	6	6	3	7	7	7	5	5	3	5	5	3	4	4	3	3	-99	-99	Mozilla/5.0 (Macintosh; Intel Mac OS X 10_13_6) AppleWebKit/605.1.15 (KHTML, like Gecko) Version/13.1.2 Safari/605.1.15	-99
1785	0	0	31	5822659	-77	960	-77	-77	-99	-99	d	2	5	21	2	2	1	0	0	0	0	-99	6	5	5	5	3	2	4	4	3	3	7	6	6	6	6	7	7	7	4	6	7	5	5	-99	-99	Mozilla/5.0 (iPhone; CPU iPhone OS 14_4_2 like Mac OS X) AppleWebKit/605.1.15 (KHTML, like Gecko) Mobile/15E148 Version/13.1 (Ecosia ios@4.1.10.875) Safari/604.1	-99
1786	0	0	31	5822659	-77	1378	-77	-77	-99	-99	d	2	3	24	2	2	0	1	0	0	0	-99	2	2	1	3	1	1	1	1	1	1	7	7	5	5	3	4	5	3	4	4	4	6	3	-99	-99	Mozilla/5.0 (Windows NT 10.0; Win64; x64; rv:87.0) Gecko/20100101 Firefox/87.0	-99
1787	0	0	31	5822659	-77	1019	-77	-77	-99	-99	d	2	5	30	2	2	1	0	0	0	0	-99	7	7	6	6	6	6	6	4	2	2	7	7	7	7	7	7	7	7	4	4	4	4	4	-99	-99	Mozilla/5.0 (Macintosh; Intel Mac OS X 10_15_7) AppleWebKit/605.1.15 (KHTML, like Gecko) Version/14.0.2 Safari/605.1.15	-99
1788	0	0	31	5822659	-77	1036	-77	-77	-99	-99	d	2	3	33	2	2	0	1	0	0	0	-99	2	1	2	4	3	2	3	1	1	1	6	6	6	6	4	3	6	4	6	3	4	3	3	-99	-99	Mozilla/5.0 (Macintosh; Intel Mac OS X 10_13_6) AppleWebKit/605.1.15 (KHTML, like Gecko) Version/13.1.2 Safari/605.1.15	-99
1790	0	0	32	5822659	-77	-1	-77	-77	-99	-99	d	2	10	23	1	2	1	0	0	0	0	-99	6	6	2	2	1	1	5	2	1	1	7	7	7	6	6	5	6	7	7	4	4	3	3	-99	-99	Mozilla/5.0 (Windows NT 10.0; Win64; x64) AppleWebKit/537.36 (KHTML, like Gecko) Chrome/89.0.4389.114 Safari/537.36	-99
1791	0	0	31	5822659	-77	1229	-77	-77	-99	-99	d	2	2	20	2	2	1	0	0	0	0	-99	5	5	5	4	3	4	1	1	1	1	7	7	7	4	4	4	4	6	6	5	4	5	4	-99	-99	Mozilla/5.0 (iPhone; CPU iPhone OS 14_4_2 like Mac OS X) AppleWebKit/605.1.15 (KHTML, like Gecko) Version/14.0.3 Mobile/15E148 Safari/604.1	-99
1793	0	0	31	5822659	-77	887	-77	-77	-99	-99	d	2	2	20	2	2	1	0	0	0	0	-99	6	7	6	6	0	0	0	0	0	0	0	0	0	0	0	0	0	0	0	0	0	0	0	-99	-99	Mozilla/5.0 (Windows NT 10.0; Win64; x64) AppleWebKit/537.36 (KHTML, like Gecko) Chrome/89.0.4389.114 Safari/537.36	https://wm.hrz.uni-giessen.de/
1794	0	0	31	5822659	-77	1233	-77	-77	-99	-99	d	2	1	20	1	2	1	1	0	0	0	-99	5	7	6	5	6	6	5	4	4	3	7	6	5	5	5	5	5	6	6	5	7	4	4	-99	-99	Mozilla/5.0 (iPhone; CPU iPhone OS 14_4 like Mac OS X) AppleWebKit/605.1.15 (KHTML, like Gecko) GSA/152.1.363973642 Mobile/15E148 Safari/604.1	-99
1795	0	0	31	5822659	-77	695	-77	-77	-99	-99	d	2	4	21	1	2	1	0	0	0	0	-99	6	6	5	4	5	3	4	4	3	2	6	4	4	4	3	5	4	6	5	3	4	2	2	-99	-99	Mozilla/5.0 (Windows NT 10.0; Win64; x64) AppleWebKit/537.36 (KHTML, like Gecko) Chrome/89.0.4389.114 Safari/537.36	-99
1796	0	0	31	5822659	-77	1026	-77	-77	-99	-99	d	2	4	22	2	2	0	1	0	0	0	-99	6	6	5	6	6	6	7	6	6	4	6	6	6	6	5	6	7	5	6	2	3	5	4	-99	-99	Mozilla/5.0 (Macintosh; Intel Mac OS X 10_15_7) AppleWebKit/605.1.15 (KHTML, like Gecko) Version/14.0.2 Safari/605.1.15	-99
1798	0	0	31	5822659	-77	920	-77	-77	-99	-99	d	2	5	28	1	2	0	1	0	0	0	-99	6	6	5	5	4	4	6	5	4	2	6	5	4	6	6	6	6	4	4	4	4	4	4	-99	-99	Mozilla/5.0 (Macintosh; Intel Mac OS X 10_15_6) AppleWebKit/605.1.15 (KHTML, like Gecko) Version/14.0.2 Safari/605.1.15	-99
1800	0	0	31	5822659	-77	2319	-77	-77	-99	-99	d	2	10	30	1	2	1	0	0	0	0	-99	5	5	4	4	1	1	4	3	1	1	7	7	7	7	5	5	7	7	4	5	5	3	3	Das Impfangebot erhielt ich im Rahmen meiner Famulatur durch Nachfrage bei der Praxisinhaberin (Allgemeinmedizin). Diese hatte zuvor eine kurzfristige Anfrage vom Impfzentrum erhalten, wer sich impfen lassen möchte. Letztendlich war ich der Einzige in der Praxis, der sich zu diesem Zeitpunkt hat impfen lassen wollen. Vor der Famulatur hatte ich große Sorge, dass ich unbemerkt mit SARS-Cov2 in Kon…	-99	Mozilla/5.0 (Windows NT 10.0; Win64; x64) AppleWebKit/537.36 (KHTML, like Gecko) Chrome/89.0.4389.90 Safari/537.36 Edg/89.0.774.63	-99
1802	0	0	31	5822659	-77	1282	-77	-77	-99	-99	d	2	8	24	2	2	1	0	0	0	0	-99	7	7	5	5	0	0	0	0	0	0	0	0	0	0	0	0	0	0	0	0	0	0	0	-99	-99	Mozilla/5.0 (Macintosh; Intel Mac OS X 10_15_6) AppleWebKit/605.1.15 (KHTML, like Gecko) Version/14.0.3 Safari/605.1.15	-99
1801	0	0	31	5822659	-77	962	-77	-77	-99	-99	d	2	2	20	2	2	1	1	0	0	0	-99	7	7	7	7	1	1	2	1	1	1	7	7	7	7	7	7	7	7	6	5	5	2	2	-99	-99	Mozilla/5.0 (iPhone; CPU iPhone OS 14_4_2 like Mac OS X) AppleWebKit/605.1.15 (KHTML, like Gecko) Version/14.0.3 Mobile/15E148 Safari/604.1	-99
1803	0	0	31	5822659	-77	1327	-77	-77	-99	-99	d	2	5	21	2	2	1	1	0	0	0	-99	5	5	2	2	2	2	2	2	2	2	7	6	6	6	6	6	6	6	7	1	1	4	4	-99	-99	Mozilla/5.0 (Linux; Android 9; SM-T825) AppleWebKit/537.36 (KHTML, like Gecko) Chrome/89.0.4389.105 Safari/537.36	https://wm.hrz.uni-giessen.de/
1804	0	0	31	5822659	-77	2327	-77	-77	-99	-99	dVielen Dank.	2	6	25	2	2	1	0	0	0	0	-99	7	7	7	4	4	2	7	7	5	3	7	5	7	7	5	7	7	5	5	3	7	2	2	-99	-99	Mozilla/5.0 (Windows NT 10.0; Win64; x64; rv:87.0) Gecko/20100101 Firefox/87.0	-99
1805	0	0	31	5822659	-77	918	-77	-77	-99	-99	d	2	9	23	2	2	0	1	0	0	0	-99	6	6	6	4	4	4	6	6	3	2	7	5	7	7	5	6	5	3	2	2	2	4	4	-99	-99	Mozilla/5.0 (Macintosh; Intel Mac OS X 10_12_6) AppleWebKit/605.1.15 (KHTML, like Gecko) Version/12.1.2 Safari/605.1.15	-99
1806	0	0	31	5812245	-77	23	-77	-77	-99	-99	d	1	-66	-66	-77	-77	-77	-77	-77	-77	-77	-66	-77	-77	-77	-77	-77	-77	-77	-77	-77	-77	-77	-77	-77	-77	-77	-77	-77	-77	-77	-77	-77	-77	-77	-66	-66	Mozilla/5.0 (iPhone; CPU iPhone OS 14_4_2 like Mac OS X) AppleWebKit/605.1.15 (KHTML, like Gecko) Version/14.0.3 Mobile/15E148 Safari/604.1	-99
1807	0	0	31	5822659	-77	1336	-77	-77	-99	-99	d	3	13	32	2	2	0	1	0	0	0	-99	6	6	6	5	3	4	5	5	4	2	5	4	5	5	5	4	5	5	6	5	5	4	4	-99	-99	Mozilla/5.0 (iPhone; CPU iPhone OS 14_4_1 like Mac OS X) AppleWebKit/605.1.15 (KHTML, like Gecko) Version/14.0.3 Mobile/15E148 Safari/604.1	-99
1809	0	0	31	5822659	-77	929	-77	-77	-99	-99	d	2	3	26	1	2	1	0	0	0	0	-99	6	6	4	5	2	2	3	2	2	2	3	2	5	5	2	5	5	5	2	6	3	1	2	-99	-99	Mozilla/5.0 (iPhone; CPU iPhone OS 14_4_1 like Mac OS X) AppleWebKit/605.1.15 (KHTML, like Gecko) Version/14.0.3 Mobile/15E148 Safari/604.1	-99
1810	0	0	31	5822659	-77	792	-77	-77	-99	-99	d	5	6	22	1	2	1	0	0	0	0	-99	2	5	4	4	1	1	1	1	1	4	7	7	7	7	7	7	6	6	6	2	3	2	2	-99	-99	Mozilla/5.0 (Macintosh; Intel Mac OS X 10_15_6) AppleWebKit/605.1.15 (KHTML, like Gecko) Version/14.0.3 Safari/605.1.15	-99
1811	0	0	31	5822659	-77	819	-77	-77	-99	-99	d	2	3	28	2	2	1	0	0	0	0	-99	5	4	3	5	1	1	2	2	2	2	7	7	7	7	7	7	7	7	7	7	7	7	7	-99	-99	Mozilla/5.0 (Linux; Android 10; SAMSUNG SM-A600FN) AppleWebKit/537.36 (KHTML, like Gecko) SamsungBrowser/13.2 Chrome/83.0.4103.106 Mobile Safari/537.36	-99
1812	0	0	31	5822659	-77	865	-77	-77	-99	-99	d	2	5	28	1	2	0	0	0	1	0	-99	6	6	6	6	6	6	6	5	3	3	6	5	5	5	3	4	5	5	6	2	3	4	5	-99	-99	Mozilla/5.0 (iPhone; CPU iPhone OS 14_4_1 like Mac OS X) AppleWebKit/605.1.15 (KHTML, like Gecko) Version/14.0.3 Mobile/15E148 Safari/604.1	-99
1814	0	0	31	5812245	-77	18	-77	-77	-99	-99	d	1	-66	-66	-77	-77	-77	-77	-77	-77	-77	-66	-77	-77	-77	-77	-77	-77	-77	-77	-77	-77	-77	-77	-77	-77	-77	-77	-77	-77	-77	-77	-77	-77	-77	-66	-66	Mozilla/5.0 (iPhone; CPU iPhone OS 14_4_2 like Mac OS X) AppleWebKit/605.1.15 (KHTML, like Gecko) Version/14.0.3 Mobile/15E148 Safari/604.1	-99
1815	0	0	31	5822659	-77	1393	-77	-77	-99	-99	d	2	2	27	2	2	1	0	0	0	0	-99	5	6	6	7	2	2	5	2	2	2	7	7	5	6	5	5	7	7	3	6	7	3	2	Studenten könnten Videos zur Impfauklärung entwickeln müssen, welche als Werbekampagne ausgerichtet werden sollen	-99	Mozilla/5.0 (Windows NT 10.0; Win64; x64; rv:87.0) Gecko/20100101 Firefox/87.0	-99
1816	0	0	31	5822659	-77	904	-77	-77	-99	-99	d	2	2	19	1	2	1	0	0	0	0	-99	7	7	6	6	5	4	7	6	5	1	7	7	7	4	7	7	7	7	4	7	7	6	6	-99	-99	Mozilla/5.0 (Linux; Android 11; SAMSUNG SM-T860) AppleWebKit/537.36 (KHTML, like Gecko) SamsungBrowser/13.2 Chrome/83.0.4103.106 Safari/537.36	-99
1817	0	0	32	5822659	-77	-1	-77	-77	-99	-99	d	2	4	29	2	2	1	1	0	0	0	-99	6	5	5	5	3	3	6	2	1	1	6	5	5	5	6	5	5	5	2	6	7	5	5	- Höhere Selbstsicherheit bei Aufklärungsgesprächen durch Übungen erhalten (z.B. durch Rollenspiele, Diagramme zum Zeigen) - Abrechnungen für längere Aufklärungsgespräche	Die Umfrage benötigte eine deutlich längere Bearbeitungszeit (35 Minuten).	Mozilla/5.0 (iPhone; CPU iPhone OS 12_5_1 like Mac OS X) AppleWebKit/605.1.15 (KHTML, like Gecko) Version/12.1.2 Mobile/15E148 Safari/604.1	-99
[truncated: 3,599 more rows]
[truncated: 46 more columns]
